# Supplementary material for: Oncogenic Herpesvirus Engages Endothelial Transcription Factors SOX18 and PROX1 to Increase Viral Genome Copies and Virus Production
Source: Oxford University Press journal article supplement (doi:10.1158/0008-5472.can-19-3103), 2020-06-09
Supplement: 00085472can193103-sup-230139_4_supp_6320223_qqzvq4.xlsx [file 00085472can193103-sup-230139_4_supp_6320223_qqzvq4.xlsx]

## Sheet: Experimental design
iSLK.219 were transduced with lentivirus expressing PROX1 or with a pSIN lentivirus control.
One day later, lytic cycle was induced by Dox treatment
Next day cells were harvested and RNA extracted.
After depletion of riboomal RNA (rRNA), RNA from three independent experiments was subjected to RNA-Seq.
FASTQ data was aligned to the annotated human reference genome hg38 and reads per each gene were quantified.
Differential gene expression (DGE) of the quantified genes is shown as PROX1 vs pSIN

## Sheet: Upregulated
GeneSymbol	Description	EntrezID	UniprotID	EnsemblID	GeneType	baseMean	log2FoldChange	lfcSE	stat	pvalue	FDR
FLT4	fms related tyrosine kinase 4 [Source:HGNC Symbol;Acc:HGNC:3767]	2324	P35916	ENSG00000037280	protein_coding	184.006	1.02232	0.130177	7.82606	5.03408e-15	5.88014e-13
TGFBR3	transforming growth factor beta receptor 3 [Source:HGNC Symbol;Acc:HGNC:11774]	7049		ENSG00000069702	protein_coding	185.973	1.187	0.125474	9.40941	4.98918e-21	1.06604e-18
SLC12A3	solute carrier family 12 member 3 [Source:HGNC Symbol;Acc:HGNC:10912]	6559	P55017	ENSG00000070915	protein_coding	144.882	1.3386	0.136296	9.73113	2.22119e-22	5.72316e-20
SYNJ2	synaptojanin 2 [Source:HGNC Symbol;Acc:HGNC:11504]	8871	O15056	ENSG00000078269	protein_coding	295.158	1.00175	0.105789	9.44881	3.42713e-21	7.50584e-19
SCTR	secretin receptor [Source:HGNC Symbol;Acc:HGNC:10608]	6344	P47872	ENSG00000080293	protein_coding	34.0205	1.4122	0.155885	8.26346	1.41512e-16	2.0662e-14
SLC4A11	solute carrier family 4 member 11 [Source:HGNC Symbol;Acc:HGNC:16438]	83959	Q8NBS3	ENSG00000088836	protein_coding	71.4034	1.53624	0.154732	9.63479	5.7009e-22	1.40684e-19
ANGPT2	angiopoietin 2 [Source:HGNC Symbol;Acc:HGNC:485]	285	O15123	ENSG00000091879	protein_coding	46.6683	1.10121	0.157762	6.92888	4.24184e-12	3.14921e-10
MSLN	mesothelin [Source:HGNC Symbol;Acc:HGNC:7371]	10232	Q13421	ENSG00000102854	protein_coding	68.2246	1.35998	0.155089	8.59369	8.42237e-18	1.37914e-15
NECAB2	N-terminal EF-hand calcium binding protein 2 [Source:HGNC Symbol;Acc:HGNC:23746]	54550	Q7Z6G3	ENSG00000103154	protein_coding	51.6627	1.07145	0.157556	6.73229	1.6701e-11	1.11262e-09
RHOV	ras homolog family member V [Source:HGNC Symbol;Acc:HGNC:18313]	171177	Q96L33	ENSG00000104140	protein_coding	42.2362	1.05621	0.157829	6.62274	3.52595e-11	2.26294e-09
MYH14	myosin heavy chain 14 [Source:HGNC Symbol;Acc:HGNC:23212]	79784	Q7Z406	ENSG00000105357	protein_coding	103.488	1.12229	0.142492	7.81321	5.57495e-15	6.34277e-13
VSIR	V-set immunoregulatory receptor [Source:HGNC Symbol;Acc:HGNC:30085]	64115	Q9H7M9	ENSG00000107738	protein_coding	311.871	1.33383	0.108896	12.1935	3.36641e-34	2.45762e-31
ADGRD1	adhesion G protein-coupled receptor D1 [Source:HGNC Symbol;Acc:HGNC:19893]	283383	Q6QNK2	ENSG00000111452	protein_coding	135.549	1.54063	0.142368	10.6695	1.41369e-26	5.50427e-24
SLC12A7	solute carrier family 12 member 7 [Source:HGNC Symbol;Acc:HGNC:10915]	10723	Q9Y666	ENSG00000113504	protein_coding	161.841	2.21631	0.14711	14.4886	1.43041e-47	3.13278e-44
STC2	stanniocalcin 2 [Source:HGNC Symbol;Acc:HGNC:11374]	8614	O76061	ENSG00000113739	protein_coding	305.795	1.06817	0.107708	9.8942	4.41108e-23	1.22677e-20
CCL20	C-C motif chemokine ligand 20 [Source:HGNC Symbol;Acc:HGNC:10619]	6364		ENSG00000115009	protein_coding	598.258	1.68948	0.0993271	16.9384	2.34535e-64	1.73339e-60
CHD5	chromodomain helicase DNA binding protein 5 [Source:HGNC Symbol;Acc:HGNC:16816]	26038	Q8TDI0	ENSG00000116254	protein_coding	36.6791	1.23508	0.156791	7.64941	2.01908e-14	2.11834e-12
PRAMEF12	PRAME family member 12 [Source:HGNC Symbol;Acc:HGNC:22125]	390999	O95522	ENSG00000116726	protein_coding	25.6631	1.21375	0.147247	5.9728	2.33221e-09	1.13193e-07
PROX1	prospero homeobox 1 [Source:HGNC Symbol;Acc:HGNC:9459]	5629		ENSG00000117707	protein_coding	171.826	3.04768	0.150018	16.7109	1.09182e-62	4.78245e-59
OLFM3	olfactomedin 3 [Source:HGNC Symbol;Acc:HGNC:17990]	118427	Q96PB7	ENSG00000118733	protein_coding	86.4115	1.38308	0.149504	9.09164	9.75587e-20	1.85796e-17
CALD1	caldesmon 1 [Source:HGNC Symbol;Acc:HGNC:1441]	800	Q05682	ENSG00000122786	protein_coding	46.3962	1.07611	0.157608	6.73487	1.64078e-11	1.09726e-09
PCK1	phosphoenolpyruvate carboxykinase 1 [Source:HGNC Symbol;Acc:HGNC:8724]	5105	P35558	ENSG00000124253	protein_coding	318.074	1.32214	0.103745	12.689	6.80303e-37	6.62199e-34
XG	Xg blood group [Source:HGNC Symbol;Acc:HGNC:12806]	7499	P55808	ENSG00000124343	protein_coding	62.1681	1.52402	0.157566	9.3876	6.13826e-21	1.29576e-18
KRT17	keratin 17 [Source:HGNC Symbol;Acc:HGNC:6427]	3872	Q04695	ENSG00000128422	protein_coding	525.438	4.25429	0.138422	24.4967	1.60061e-132	2.80443e-128
DLL4	delta like canonical Notch ligand 4 [Source:HGNC Symbol;Acc:HGNC:2910]	54567	Q9NR61	ENSG00000128917	protein_coding	54.43	1.93644	0.157884	9.99507	1.60179e-23	4.60083e-21
SULT4A1	sulfotransferase family 4A member 1 [Source:HGNC Symbol;Acc:HGNC:14903]	25830	Q9BR01	ENSG00000130540	protein_coding	43.211	1.46921	0.157858	8.80485	1.31027e-18	2.27299e-16
DSC1	desmocollin 1 [Source:HGNC Symbol;Acc:HGNC:3035]	1823	Q08554	ENSG00000134765	protein_coding	48.8167	1.31806	0.157869	8.13483	4.12527e-16	5.82894e-14
LUM	lumican [Source:HGNC Symbol;Acc:HGNC:6724]	4060	P51884	ENSG00000139329	protein_coding	129.871	2.7408	0.149489	15.6995	1.52493e-55	4.45304e-52
TMC6	transmembrane channel like 6 [Source:HGNC Symbol;Acc:HGNC:18021]	11322	Q7Z403	ENSG00000141524	protein_coding	146.16	1.63063	0.149145	10.8006	3.41932e-27	1.36159e-24
CARD14	caspase recruitment domain family member 14 [Source:HGNC Symbol;Acc:HGNC:16446]	79092		ENSG00000141527	protein_coding	75.8897	1.27372	0.15419	8.14709	3.72797e-16	5.31039e-14
TTYH2	tweety family member 2 [Source:HGNC Symbol;Acc:HGNC:13877]	94015	Q9BSA4	ENSG00000141540	protein_coding	141.872	1.69557	0.144387	11.5363	8.66111e-31	5.23281e-28
EIF4A3	eukaryotic translation initiation factor 4A3 [Source:HGNC Symbol;Acc:HGNC:18683]	9775	P38919	ENSG00000141543	protein_coding	9599.31	1.13113	0.100066	11.304	1.25341e-29	6.45913e-27
ABCG8	ATP binding cassette subfamily G member 8 [Source:HGNC Symbol;Acc:HGNC:13887]	64241		ENSG00000143921	protein_coding	98.589	2.20336	0.155872	12.9269	3.17431e-38	3.27159e-35
CNGA3	cyclic nucleotide gated channel alpha 3 [Source:HGNC Symbol;Acc:HGNC:2150]	1261	Q16281	ENSG00000144191	protein_coding	49.3428	1.62306	0.157863	9.59395	8.47787e-22	2.03481e-19
ACKR3	atypical chemokine receptor 3 [Source:HGNC Symbol;Acc:HGNC:23692]	57007		ENSG00000144476	protein_coding	99.6359	1.81654	0.151317	11.5838	4.97747e-31	3.11465e-28
PTGES	prostaglandin E synthase [Source:HGNC Symbol;Acc:HGNC:9599]	9536	O14684	ENSG00000148344	protein_coding	226.998	1.22176	0.117803	10.3212	5.6512e-25	1.8682e-22
FRMD1	FERM domain containing 1 [Source:HGNC Symbol;Acc:HGNC:21240]	79981		ENSG00000153303	protein_coding	19.4735	1.01128	0.145043	6.25952	3.86154e-10	2.13399e-08
ADPRHL1	ADP-ribosylhydrolase like 1 [Source:HGNC Symbol;Acc:HGNC:21303]	113622		ENSG00000153531	protein_coding	203.94	1.17721	0.12875	9.10598	8.54937e-20	1.64608e-17
GPR153	G protein-coupled receptor 153 [Source:HGNC Symbol;Acc:HGNC:23618]	387509	Q6NV75	ENSG00000158292	protein_coding	287.158	1.33108	0.116801	11.3437	7.97085e-30	4.23204e-27
MSX1	msh homeobox 1 [Source:HGNC Symbol;Acc:HGNC:7391]	4487	P28360	ENSG00000163132	protein_coding	1050.2	1.23147	0.0876419	14.0381	9.10745e-45	1.59572e-41
SLC51A	solute carrier family 51 alpha subunit [Source:HGNC Symbol;Acc:HGNC:29955]	200931		ENSG00000163959	protein_coding	161.526	1.39503	0.133043	10.3859	2.87432e-25	9.68481e-23
HEY1	hes related family bHLH transcription factor with YRPW motif 1 [Source:HGNC Symbol;Acc:HGNC:4880]	23462	Q9Y5J3	ENSG00000164683	protein_coding	1345.72	1.38801	0.0819285	16.9245	2.96797e-64	1.73339e-60
SERPINB9	serpin family B member 9 [Source:HGNC Symbol;Acc:HGNC:8955]	5272	P50453	ENSG00000170542	protein_coding	237.872	1.07651	0.112027	9.57826	9.86907e-22	2.30555e-19
TPPP	tubulin polymerization promoting protein [Source:HGNC Symbol;Acc:HGNC:24164]	11076	O94811	ENSG00000171368	protein_coding	235.61	1.11103	0.113664	9.74022	2.03112e-22	5.31154e-20
ISG20	interferon stimulated exonuclease gene 20 [Source:HGNC Symbol;Acc:HGNC:6130]	3669	Q96AZ6	ENSG00000172183	protein_coding	118.346	1.73319	0.145559	11.611	3.62236e-31	2.35064e-28
C2orf54	chromosome 2 open reading frame 54 [Source:HGNC Symbol;Acc:HGNC:26216]	79919	Q08AI8	ENSG00000172478	protein_coding	23.6424	1.07063	0.144419	6.22172	4.91721e-10	2.66732e-08
AGXT	alanine-glyoxylate aminotransferase [Source:HGNC Symbol;Acc:HGNC:341]	189	P21549	ENSG00000172482	protein_coding	19.0067	1.02921	0.144063	5.91136	3.39297e-09	1.58952e-07
FRG2C	FSHD region gene 2 family member C [Source:HGNC Symbol;Acc:HGNC:33626]	100288801	A6NGY1	ENSG00000172969	protein_coding	25.6216	1.33403	0.149695	6.8005	1.0426e-11	7.20457e-10
SPTBN2	spectrin beta, non-erythrocytic 2 [Source:HGNC Symbol;Acc:HGNC:11276]	6712	O15020	ENSG00000173898	protein_coding	496.02	1.3736	0.115415	11.8699	1.69691e-32	1.14352e-29
SLC6A19	solute carrier family 6 member 19 [Source:HGNC Symbol;Acc:HGNC:27960]	340024		ENSG00000174358	protein_coding	100.486	2.22427	0.152879	13.3699	9.0674e-41	1.13478e-37
FAM241A	family with sequence similarity 241 member A [Source:HGNC Symbol;Acc:HGNC:26813]		Q8N8J7	ENSG00000174749	protein_coding	166.724	1.02641	0.136858	7.47167	7.91807e-14	7.66478e-12
CA5A	carbonic anhydrase 5A [Source:HGNC Symbol;Acc:HGNC:1377]	763	P35218	ENSG00000174990	protein_coding	49.8701	1.54386	0.157928	9.27809	1.72551e-20	3.51542e-18
ERFE	erythroferrone [Source:HGNC Symbol;Acc:HGNC:26727]	151176	Q4G0M1	ENSG00000178752	protein_coding	158.494	1.73765	0.138177	12.3485	4.96357e-35	3.78116e-32
CDH5	cadherin 5 [Source:HGNC Symbol;Acc:HGNC:1764]	1003	P33151	ENSG00000179776	protein_coding	46.0584	1.09108	0.157671	6.8201	9.09748e-12	6.40149e-10
ZSCAN4	zinc finger and SCAN domain containing 4 [Source:HGNC Symbol;Acc:HGNC:23709]	201516	Q8NAM6	ENSG00000180532	protein_coding	25.0479	1.20215	0.148324	6.42896	1.28484e-10	7.63107e-09
PHLDA2	pleckstrin homology like domain family A member 2 [Source:HGNC Symbol;Acc:HGNC:12385]	7262	Q53GA4	ENSG00000181649	protein_coding	180.772	1.10374	0.137316	8.00712	1.17426e-15	1.58263e-13
TRIM49B	tripartite motif containing 49B [Source:HGNC Symbol;Acc:HGNC:42955]	283116	A6NDI0	ENSG00000182053	protein_coding	37.1798	1.48739	0.153603	7.58254	3.38856e-14	3.43185e-12
				ENSG00000184385		41.8349	1.74233	0.156969	8.59489	8.33456e-18	1.37764e-15
TNFAIP2	TNF alpha induced protein 2 [Source:HGNC Symbol;Acc:HGNC:11895]	7127		ENSG00000185215	protein_coding	1329.65	1.05938	0.078775	13.4413	3.4619e-41	4.66585e-38
NDUFA4L2	NDUFA4, mitochondrial complex associated like 2 [Source:HGNC Symbol;Acc:HGNC:29836]	56901	Q9NRX3	ENSG00000185633	protein_coding	140.568	1.08386	0.15408	7.49619	6.56983e-14	6.43073e-12
IKZF1	IKAROS family zinc finger 1 [Source:HGNC Symbol;Acc:HGNC:13176]	10320		ENSG00000185811	protein_coding	60.1549	1.45045	0.157259	8.98136	2.67447e-19	4.83087e-17
THBS2	thrombospondin 2 [Source:HGNC Symbol;Acc:HGNC:11786]	7058	P35442	ENSG00000186340	protein_coding	65.1644	1.10648	0.157437	6.98604	2.8275e-12	2.17283e-10
ESPN	espin [Source:HGNC Symbol;Acc:HGNC:13281]	83715		ENSG00000187017	protein_coding	85.0982	1.07747	0.151009	7.08005	1.44107e-12	1.17986e-10
WNT7B	Wnt family member 7B [Source:HGNC Symbol;Acc:HGNC:12787]	7477	P56706	ENSG00000188064	protein_coding	25.3003	1.14584	0.152861	7.07334	1.51246e-12	1.22685e-10
CACNA1H	calcium voltage-gated channel subunit alpha1 H [Source:HGNC Symbol;Acc:HGNC:1395]	8912	O95180	ENSG00000196557	protein_coding	29.1941	1.12669	0.151996	7.19392	6.29551e-13	5.43367e-11
				ENSG00000199377		1871.61	1.02138	0.14863	6.89356	5.4412e-12	3.93947e-10
TRIM49C	tripartite motif containing 49C [Source:HGNC Symbol;Acc:HGNC:38877]	642612	P0CI26	ENSG00000204449	protein_coding	35.7993	1.55456	0.153661	6.45088	1.112e-10	6.62701e-09
				ENSG00000206885		142.437	1.0556	0.134355	7.82083	5.24771e-15	6.02527e-13
				ENSG00000212443		429.778	1.04471	0.118154	8.83159	1.03197e-18	1.80812e-16
MUC5AC	mucin 5AC, oligomeric mucus/gel-forming [Source:HGNC Symbol;Acc:HGNC:7515]	4586	P98088	ENSG00000215182	protein_coding	26.0464	1.22778	0.147624	5.99338	2.0552e-09	1.01434e-07
				ENSG00000233518		25.971	1.04243	0.14798	6.8725	6.30874e-12	4.53014e-10
				ENSG00000236138		106.426	2.36356	0.153375	13.8571	1.15304e-43	1.83659e-40
				ENSG00000238363		132.462	1.03214	0.136252	7.54083	4.66977e-14	4.62254e-12
				ENSG00000242641		102.325	1.67424	0.149766	10.8977	1.18179e-27	4.93003e-25
				ENSG00000249620		33.3333	1.48769	0.152265	7.1349	9.68563e-13	8.08104e-11
AC233724.12				ENSG00000250782	protein_coding	37.2525	1.56045	0.15363	6.49459	8.32618e-11	5.1187e-09
				ENSG00000251733		105.142	1.00513	0.148554	6.74012	1.58253e-11	1.06644e-09
				ENSG00000252213		780.509	1.06306	0.100991	10.5198	7.00584e-26	2.45499e-23
				ENSG00000253978		51.1931	1.09026	0.157775	6.83978	7.93156e-12	5.60359e-10
				ENSG00000254764		24.5685	1.32813	0.150324	5.9757	2.29102e-09	1.11688e-07
KDM4F	lysine demethylase 4F [Source:HGNC Symbol;Acc:HGNC:52413]			ENSG00000255855	protein_coding	22.2544	1.1931	0.147033	5.81737	5.97792e-09	2.63762e-07
				ENSG00000257951		22.9195	1.18953	0.146836	5.84618	5.02995e-09	2.24249e-07
				ENSG00000258991		65.5818	2.07633	0.157804	11.0146	3.25153e-28	1.53185e-25
				ENSG00000259029		27.4958	1.27887	0.153733	7.54251	4.61001e-14	4.58932e-12
				ENSG00000259154		32.1689	1.14539	0.153618	7.3043	2.78716e-13	2.49153e-11
H3.Y	histone cluster 2, H3c pseudogene [Source:NCBI gene;Acc:391769]	391769		ENSG00000269466	protein_coding	62.9572	2.06925	0.157899	9.90159	4.09705e-23	1.15781e-20
				ENSG00000282842		20.8905	1.00269	0.141785	5.60658	2.06358e-08	8.21726e-07
AC233724.15				ENSG00000283740	protein_coding	56.2124	2.0464	0.157527	7.06575	1.59746e-12	1.28982e-10
AC233724.16				ENSG00000283776	protein_coding	23.2004	1.10416	0.144149	5.81721	5.98392e-09	2.63762e-07
AC106774.8	Putative TAF11-like protein ENSP00000332601 [Source:UniProtKB/Swiss-Prot;Acc:A6NLC8]		A6NLC8	ENSG00000284373	protein_coding	20.517	1.1297	0.144546	6.47467	9.50185e-11	5.78062e-09

## Sheet: Downregulated
GeneSymbol	Description	EntrezID	UniprotID	EnsemblID	GeneType	baseMean	log2FoldChange	lfcSE	stat	pvalue	FDR
RGS5	regulator of G protein signaling 5 [Source:HGNC Symbol;Acc:HGNC:10001]	8490	O15539	ENSG00000143248	protein_coding	2620.18	-1.02585	0.0717138	-14.2972	2.27943e-46	4.43755e-43

## Sheet: Unfiltered
GeneSymbol	Description	EntrezID	UniprotID	EnsemblID	GeneType	baseMean	log2FoldChange	lfcSE	stat	pvalue	FDR
TSPAN6	tetraspanin 6 [Source:HGNC Symbol;Acc:HGNC:11858]	7105	O43657	ENSG00000000003	protein_coding	2954.12	-0.00393878	0.0580959	-0.0677988	0.945946	0.985882
TNMD	tenomodulin [Source:HGNC Symbol;Acc:HGNC:17757]	64102	Q9H2S6	ENSG00000000005	protein_coding	0.176059	0.00862596	0.0243034	0.354932	0.722641
DPM1	dolichyl-phosphate mannosyltransferase subunit 1, catalytic [Source:HGNC Symbol;Acc:HGNC:3005]	8813	O60762	ENSG00000000419	protein_coding	995.484	0.0900656	0.0680306	1.32393	0.185526	0.511156
SCYL3	SCY1 like pseudokinase 3 [Source:HGNC Symbol;Acc:HGNC:19285]	57147	Q8IZE3	ENSG00000000457	protein_coding	305.564	-0.0183006	0.104819	-0.174606	0.861389	0.9613
C1orf112	chromosome 1 open reading frame 112 [Source:HGNC Symbol;Acc:HGNC:25565]	55732		ENSG00000000460	protein_coding	438.098	0.0187645	0.0921458	0.203649	0.838628	0.95499
FGR	FGR proto-oncogene, Src family tyrosine kinase [Source:HGNC Symbol;Acc:HGNC:3697]	2268	P09769	ENSG00000000938	protein_coding	1.27312	0.0490875	0.0545809	0.937357	0.348575
CFH	complement factor H [Source:HGNC Symbol;Acc:HGNC:4883]	3075	P08603	ENSG00000000971	protein_coding	3568.65	-0.0983479	0.0562622	-1.74802	0.0804604	0.311357
FUCA2	alpha-L-fucosidase 2 [Source:HGNC Symbol;Acc:HGNC:4008]	2519	Q9BTY2	ENSG00000001036	protein_coding	1252.7	-0.00323616	0.063135	-0.0512588	0.959119	0.989522
GCLC	glutamate-cysteine ligase catalytic subunit [Source:HGNC Symbol;Acc:HGNC:4311]	2729		ENSG00000001084	protein_coding	573.006	0.0183793	0.0814069	0.225778	0.821374	0.949864
NFYA	nuclear transcription factor Y subunit alpha [Source:HGNC Symbol;Acc:HGNC:7804]	4800	P23511	ENSG00000001167	protein_coding	346.321	-0.0895243	0.0983127	-0.910447	0.362587	0.717515
STPG1	sperm tail PG-rich repeat containing 1 [Source:HGNC Symbol;Acc:HGNC:28070]	90529	Q5TH74	ENSG00000001460	protein_coding	164.758	-0.154878	0.124706	-1.24121	0.214527	0.553382
NIPAL3	NIPA like domain containing 3 [Source:HGNC Symbol;Acc:HGNC:25233]	57185	Q6P499	ENSG00000001461	protein_coding	673.066	-0.0540649	0.0869668	-0.621628	0.534186	0.835903
LAS1L	LAS1 like, ribosome biogenesis factor [Source:HGNC Symbol;Acc:HGNC:25726]	81887	Q9Y4W2	ENSG00000001497	protein_coding	2323.52	0.109205	0.0548096	1.99249	0.0463169	0.217332
ENPP4	ectonucleotide pyrophosphatase/phosphodiesterase 4 [Source:HGNC Symbol;Acc:HGNC:3359]	22875	Q9Y6X5	ENSG00000001561	protein_coding	230.365	-0.0916917	0.112685	-0.813617	0.415864	0.762402
SEMA3F	semaphorin 3F [Source:HGNC Symbol;Acc:HGNC:10728]	6405		ENSG00000001617	protein_coding	255.71	-0.081773	0.109001	-0.750059	0.453219	0.787783
CFTR	cystic fibrosis transmembrane conductance regulator [Source:HGNC Symbol;Acc:HGNC:1884]	1080		ENSG00000001626	protein_coding	9.83616	-0.0520895	0.128551	-0.405595	0.68504	0.903334
ANKIB1	ankyrin repeat and IBR domain containing 1 [Source:HGNC Symbol;Acc:HGNC:22215]	54467	Q9P2G1	ENSG00000001629	protein_coding	1739.04	-0.0346556	0.0565902	-0.61239	0.54028	0.840211
CYP51A1	cytochrome P450 family 51 subfamily A member 1 [Source:HGNC Symbol;Acc:HGNC:2649]	1595		ENSG00000001630	protein_coding	180.626	0.0764106	0.122228	0.625255	0.531803	0.834616
KRIT1	KRIT1, ankyrin repeat containing [Source:HGNC Symbol;Acc:HGNC:1573]	889	O00522	ENSG00000001631	protein_coding	605.955	-0.0179968	0.0807278	-0.222922	0.823596	0.950984
RAD52	RAD52 homolog, DNA repair protein [Source:HGNC Symbol;Acc:HGNC:9824]	5893	P43351	ENSG00000002016	protein_coding	182.879	-0.113488	0.119985	-0.945567	0.344369	0.702328
				ENSG00000002079		1.99971	0.0195782	0.0683217	0.286524	0.774477
BAD	BCL2 associated agonist of cell death [Source:HGNC Symbol;Acc:HGNC:936]	572	Q92934	ENSG00000002330	protein_coding	527.699	-0.181464	0.0910582	-1.99236	0.0463317	0.217343
LAP3	leucine aminopeptidase 3 [Source:HGNC Symbol;Acc:HGNC:18449]	51056	P28838	ENSG00000002549	protein_coding	1916.2	0.124729	0.0568154	2.19539	0.0281354	0.154581
CD99	CD99 molecule (Xg blood group) [Source:HGNC Symbol;Acc:HGNC:7082]	4267	P14209	ENSG00000002586	protein_coding	1238.23	-0.0670547	0.0658005	-1.01904	0.308184	0.666793
HS3ST1	heparan sulfate-glucosamine 3-sulfotransferase 1 [Source:HGNC Symbol;Acc:HGNC:5194]	9957	O14792	ENSG00000002587	protein_coding	23.4488	-0.0234701	0.15136	-0.155027	0.8768	0.966582
AOC1	amine oxidase, copper containing 1 [Source:HGNC Symbol;Acc:HGNC:80]	26	P19801	ENSG00000002726	protein_coding	0.976878	0.0616606	0.0442049	1.60974	0.107454
WNT16	Wnt family member 16 [Source:HGNC Symbol;Acc:HGNC:16267]	51384		ENSG00000002745	protein_coding	0.949854	-0.0121003	0.0483624	-0.252007	0.801035
HECW1	HECT, C2 and WW domain containing E3 ubiquitin protein ligase 1 [Source:HGNC Symbol;Acc:HGNC:22195]	23072	Q76N89	ENSG00000002746	protein_coding	112.974	-0.163416	0.137673	-1.18629	0.235509	0.583559
MAD1L1	mitotic arrest deficient 1 like 1 [Source:HGNC Symbol;Acc:HGNC:6762]	8379	Q9Y6D9	ENSG00000002822	protein_coding	2118.59	0.237687	0.0690172	3.44387	0.000573452	0.00743705
LASP1	LIM and SH3 protein 1 [Source:HGNC Symbol;Acc:HGNC:6513]	3927	Q14847	ENSG00000002834	protein_coding	8424.75	0.041312	0.0456371	0.90523	0.365343	0.720367
SNX11	sorting nexin 11 [Source:HGNC Symbol;Acc:HGNC:14975]	29916		ENSG00000002919	protein_coding	454.416	-0.127689	0.0950293	-1.34355	0.179093	0.50054
TMEM176A	transmembrane protein 176A [Source:HGNC Symbol;Acc:HGNC:24930]	55365	Q96HP8	ENSG00000002933	protein_coding	0.533926	0.0179116	0.0363742	0.512028	0.608632
M6PR	mannose-6-phosphate receptor, cation dependent [Source:HGNC Symbol;Acc:HGNC:6752]	4074		ENSG00000003056	protein_coding	2636.3	-0.0808109	0.0519551	-1.55538	0.119856	0.39806
KLHL13	kelch like family member 13 [Source:HGNC Symbol;Acc:HGNC:22931]	90293		ENSG00000003096	protein_coding	0.774089	-0.00394692	0.0444734	-0.0877811	0.930051
CYP26B1	cytochrome P450 family 26 subfamily B member 1 [Source:HGNC Symbol;Acc:HGNC:20581]	56603	Q9NR63	ENSG00000003137	protein_coding	39.1649	0.357324	0.15751	2.27152	0.0231156	0.13468
ICA1	islet cell autoantigen 1 [Source:HGNC Symbol;Acc:HGNC:5343]	3382	Q05084	ENSG00000003147	protein_coding	2.46066	0.0816352	0.0770377	1.07483	0.282449
DBNDD1	dysbindin domain containing 1 [Source:HGNC Symbol;Acc:HGNC:28455]	79007	Q9H9R9	ENSG00000003249	protein_coding	43.4111	0.403272	0.157472	2.56	0.0104672	0.0744305
ALS2	ALS2, alsin Rho guanine nucleotide exchange factor [Source:HGNC Symbol;Acc:HGNC:443]	57679	Q96Q42	ENSG00000003393	protein_coding	1894.3	-0.0562355	0.0610365	-0.921332	0.356877	0.713038
CASP10	caspase 10 [Source:HGNC Symbol;Acc:HGNC:1500]	843	Q92851	ENSG00000003400	protein_coding	455.847	0.0567022	0.0911165	0.622301	0.533744	0.835871
CFLAR	CASP8 and FADD like apoptosis regulator [Source:HGNC Symbol;Acc:HGNC:1876]	8837	O15519	ENSG00000003402	protein_coding	1665.16	-0.095398	0.0576673	-1.65422	0.0980836	0.351149
TFPI	tissue factor pathway inhibitor [Source:HGNC Symbol;Acc:HGNC:11760]	7035	P10646	ENSG00000003436	protein_coding	745.297	-0.0724801	0.0779439	-0.929898	0.352424	0.709098
NDUFAF7	NADH:ubiquinone oxidoreductase complex assembly factor 7 [Source:HGNC Symbol;Acc:HGNC:28816]	55471		ENSG00000003509	protein_coding	381.915	0.157823	0.0953695	1.65501	0.0979234	0.350719
RBM5	RNA binding motif protein 5 [Source:HGNC Symbol;Acc:HGNC:9902]	10181	P52756	ENSG00000003756	protein_coding	1410.03	-0.0199861	0.0633053	-0.315708	0.752224	0.928068
MTMR7	myotubularin related protein 7 [Source:HGNC Symbol;Acc:HGNC:7454]	9108	Q9Y216	ENSG00000003987	protein_coding	22.1394	-0.0372514	0.152986	-0.243295	0.807777	0.946566
SLC7A2	solute carrier family 7 member 2 [Source:HGNC Symbol;Acc:HGNC:11060]	6542	P52569	ENSG00000003989	protein_coding	0.808262	-0.00332623	0.0450259	-0.0738222	0.941152
ARF5	ADP ribosylation factor 5 [Source:HGNC Symbol;Acc:HGNC:658]	381	P84085	ENSG00000004059	protein_coding	1147.42	-0.0690968	0.0688499	-1.00355	0.315597	0.674705
SARM1	sterile alpha and TIR motif containing 1 [Source:HGNC Symbol;Acc:HGNC:17074]	23098	Q6SZW1	ENSG00000004139	protein_coding	7.29288	0.0584435	0.117062	0.498856	0.617881	0.876722
POLDIP2	DNA polymerase delta interacting protein 2 [Source:HGNC Symbol;Acc:HGNC:23781]	26073	Q9Y2S7	ENSG00000004142	protein_coding	2145.63	-0.142529	0.0572394	-2.48996	0.0127758	0.0857312
PLXND1	plexin D1 [Source:HGNC Symbol;Acc:HGNC:9107]	23129	Q9Y4D7	ENSG00000004399	protein_coding	2654.24	-0.182447	0.0589451	-3.09506	0.00196772	0.0204729
AK2	adenylate kinase 2 [Source:HGNC Symbol;Acc:HGNC:362]	204	P54819	ENSG00000004455	protein_coding	3173.64	0.0866386	0.0538742	1.60817	0.107798	0.373119
CD38	CD38 molecule [Source:HGNC Symbol;Acc:HGNC:1667]	952	P28907	ENSG00000004468	protein_coding	1.19981	0.0445007	0.0524629	0.877118	0.380423
FKBP4	FK506 binding protein 4 [Source:HGNC Symbol;Acc:HGNC:3720]	2288	Q02790	ENSG00000004478	protein_coding	2497	0.071122	0.0563079	1.2631	0.206552	0.542497
KDM1A	lysine demethylase 1A [Source:HGNC Symbol;Acc:HGNC:29079]	23028		ENSG00000004487	protein_coding	4918.79	-0.0739094	0.0447318	-1.65227	0.0984797	0.352279
RBM6	RNA binding motif protein 6 [Source:HGNC Symbol;Acc:HGNC:9903]	10180	P78332	ENSG00000004534	protein_coding	939.212	0.116885	0.0679721	1.71969	0.0854892	0.322597
CAMKK1	calcium/calmodulin dependent protein kinase kinase 1 [Source:HGNC Symbol;Acc:HGNC:1469]	84254		ENSG00000004660	protein_coding	230.098	-0.199638	0.117599	-1.69633	0.0898242	0.332393
RECQL	RecQ like helicase [Source:HGNC Symbol;Acc:HGNC:9948]	5965	P46063	ENSG00000004700	protein_coding	1903.12	-0.0168192	0.0579075	-0.290449	0.771473	0.934267
VPS50	VPS50, EARP/GARPII complex subunit [Source:HGNC Symbol;Acc:HGNC:25956]	55610	Q96JG6	ENSG00000004766	protein_coding	495.046	-0.133929	0.0898465	-1.49042	0.136115	0.429474
HSPB6	heat shock protein family B (small) member 6 [Source:HGNC Symbol;Acc:HGNC:26511]	126393	O14558	ENSG00000004776	protein_coding	0.357867	0.00442381	0.0299821	0.147551	0.882697
ARHGAP33	Rho GTPase activating protein 33 [Source:HGNC Symbol;Acc:HGNC:23085]	115703	O14559	ENSG00000004777	protein_coding	25.3041	-0.0602721	0.15476	-0.389576	0.69685	0.907703
NDUFAB1	NADH:ubiquinone oxidoreductase subunit AB1 [Source:HGNC Symbol;Acc:HGNC:7694]	4706	O14561	ENSG00000004779	protein_coding	1194.91	-0.0254926	0.0665422	-0.383098	0.701647	0.909941
PDK4	pyruvate dehydrogenase kinase 4 [Source:HGNC Symbol;Acc:HGNC:8812]	5166	Q16654	ENSG00000004799	protein_coding	102.716	-0.110997	0.141262	-0.78521	0.43233	0.774525
SLC22A16	solute carrier family 22 member 16 [Source:HGNC Symbol;Acc:HGNC:20302]	85413		ENSG00000004809	protein_coding	0.152699	-0.00283079	0.0243034	-0.116473	0.907278
ZMYND10	zinc finger MYND-type containing 10 [Source:HGNC Symbol;Acc:HGNC:19412]	51364	O75800	ENSG00000004838	protein_coding	10.4444	-0.149009	0.124739	-1.20642	0.227655	0.571516
ABCB5	ATP binding cassette subfamily B member 5 [Source:HGNC Symbol;Acc:HGNC:46]	340273	Q2M3G0	ENSG00000004846	protein_coding	0.733051	0.0333553	0.0411477	0.832696	0.405016
ARX	aristaless related homeobox [Source:HGNC Symbol;Acc:HGNC:18060]	170302	Q96QS3	ENSG00000004848	protein_coding	1.53786	-0.0297269	0.0623537	-0.47993	0.631277
SLC25A13	solute carrier family 25 member 13 [Source:HGNC Symbol;Acc:HGNC:10983]	10165	Q9UJS0	ENSG00000004864	protein_coding	1347.58	-0.123127	0.0617876	-1.99265	0.0462994	0.217308
ST7	suppression of tumorigenicity 7 [Source:HGNC Symbol;Acc:HGNC:11351]	7982		ENSG00000004866	protein_coding	209.819	0.0588235	0.115513	0.509275	0.610559	0.873702
CDC27	cell division cycle 27 [Source:HGNC Symbol;Acc:HGNC:1728]	996	P30260	ENSG00000004897	protein_coding	2426.19	0.0946813	0.0531955	1.77989	0.0750939	0.298282
SLC4A1	solute carrier family 4 member 1 (Diego blood group) [Source:HGNC Symbol;Acc:HGNC:11027]	6521	P02730	ENSG00000004939	protein_coding	0.152699	-0.00283079	0.0243034	-0.116473	0.907278
CALCR	calcitonin receptor [Source:HGNC Symbol;Acc:HGNC:1440]	799		ENSG00000004948	protein_coding	6.26133	-0.0726403	0.111242	-0.6573	0.510988	0.821882
HCCS	holocytochrome c synthase [Source:HGNC Symbol;Acc:HGNC:4837]	3052	P53701	ENSG00000004961	protein_coding	431.076	-0.0638214	0.0937396	-0.680741	0.496035	0.814716
DVL2	dishevelled segment polarity protein 2 [Source:HGNC Symbol;Acc:HGNC:3086]	1856	O14641	ENSG00000004975	protein_coding	832.182	-0.255109	0.0717875	-3.55292	0.000380983	0.00531042
PRSS22	serine protease 22 [Source:HGNC Symbol;Acc:HGNC:14368]	64063	Q9GZN4	ENSG00000005001	protein_coding	0.176059	0.00862596	0.0243034	0.354932	0.722641
UPF1	UPF1, RNA helicase and ATPase [Source:HGNC Symbol;Acc:HGNC:9962]	5976	Q92900	ENSG00000005007	protein_coding	2779.34	-0.0550598	0.0489883	-1.12393	0.261044	0.613267
SKAP2	src kinase associated phosphoprotein 2 [Source:HGNC Symbol;Acc:HGNC:15687]	8935	O75563	ENSG00000005020	protein_coding	607.909	-0.120035	0.0814418	-1.47375	0.140549	0.437632
SLC25A5	solute carrier family 25 member 5 [Source:HGNC Symbol;Acc:HGNC:10991]	292	P05141	ENSG00000005022	protein_coding	3500.8	-0.0507616	0.0535583	-0.947771	0.343246	0.700724
MCUB	mitochondrial calcium uniporter dominant negative beta subunit [Source:HGNC Symbol;Acc:HGNC:26076]	55013	Q9NWR8	ENSG00000005059	protein_coding	623.736	-0.0660267	0.0802644	-0.822586	0.410743	0.759021
HOXA11	homeobox A11 [Source:HGNC Symbol;Acc:HGNC:5101]	3207		ENSG00000005073	protein_coding	55.9061	-0.115535	0.155563	-0.742541	0.45776	0.789954
POLR2J	RNA polymerase II subunit J [Source:HGNC Symbol;Acc:HGNC:9197]	5439	P52435	ENSG00000005075	protein_coding	241.902	-0.0960995	0.112039	-0.857552	0.39114	0.742427
DHX33	DEAH-box helicase 33 [Source:HGNC Symbol;Acc:HGNC:16718]	56919	Q9H6R0	ENSG00000005100	protein_coding	354.773	0.255625	0.0999474	2.55782	0.0105332	0.0747781
MEOX1	mesenchyme homeobox 1 [Source:HGNC Symbol;Acc:HGNC:7013]	4222	P50221	ENSG00000005102	protein_coding	9.24239	-0.0124836	0.123756	-0.101107	0.919465	0.979785
THSD7A	thrombospondin type 1 domain containing 7A [Source:HGNC Symbol;Acc:HGNC:22207]	221981	Q9UPZ6	ENSG00000005108	protein_coding	107.895	0.469036	0.139509	3.36029	0.000778597	0.00964085
LIG3	DNA ligase 3 [Source:HGNC Symbol;Acc:HGNC:6600]	3980	P49916	ENSG00000005156	protein_coding	477.805	-0.0383424	0.0866253	-0.442596	0.658058	0.89414
RPAP3	RNA polymerase II associated protein 3 [Source:HGNC Symbol;Acc:HGNC:26151]	79657	Q9H6T3	ENSG00000005175	protein_coding	1015.86	0.219401	0.0679559	3.2287	0.00124356	0.0141391
ACSM3	acyl-CoA synthetase medium chain family member 3 [Source:HGNC Symbol;Acc:HGNC:10522]	6296		ENSG00000005187	protein_coding	43.3083	-0.268961	0.157651	-1.70132	0.0888828	0.330265
REXO5	RNA exonuclease 5 [Source:HGNC Symbol;Acc:HGNC:24661]	81691		ENSG00000005189	protein_coding	148.251	-0.018837	0.133288	-0.141344	0.887598	0.970616
CIAPIN1	cytokine induced apoptosis inhibitor 1 [Source:HGNC Symbol;Acc:HGNC:28050]	57019	Q6FI81	ENSG00000005194	protein_coding	1502.85	-0.0190494	0.0638842	-0.298186	0.765561	0.932328
SPPL2B	signal peptide peptidase like 2B [Source:HGNC Symbol;Acc:HGNC:30627]	56928	Q8TCT7	ENSG00000005206	protein_coding	452.32	-0.176016	0.0990289	-1.77692	0.0755808	0.299329
FAM214B	family with sequence similarity 214 member B [Source:HGNC Symbol;Acc:HGNC:25666]	80256	Q7L5A3	ENSG00000005238	protein_coding	118.126	-0.175902	0.138845	-1.26636	0.205384	0.541053
COPZ2	coatomer protein complex subunit zeta 2 [Source:HGNC Symbol;Acc:HGNC:19356]	51226		ENSG00000005243	protein_coding	142.307	-0.214903	0.130984	-1.63962	0.101083	0.358446
PRKAR2B	protein kinase cAMP-dependent type II regulatory subunit beta [Source:HGNC Symbol;Acc:HGNC:9392]	5577	P31323	ENSG00000005249	protein_coding	7.33004	0.0875556	0.114705	0.766033	0.443656	0.782391
MSL3	MSL complex subunit 3 [Source:HGNC Symbol;Acc:HGNC:7370]	10943	Q8N5Y2	ENSG00000005302	protein_coding	417.607	-0.0795448	0.0940627	-0.845568	0.397794	0.747987
CREBBP	CREB binding protein [Source:HGNC Symbol;Acc:HGNC:2348]	1387	Q92793	ENSG00000005339	protein_coding	579.464	-0.0714232	0.0844705	-0.845447	0.397861	0.748034
TSPOAP1	TSPO associated protein 1 [Source:HGNC Symbol;Acc:HGNC:16831]	9256		ENSG00000005379	protein_coding	0.484468	-0.00478921	0.0352772	-0.132581	0.894525
MPO	myeloperoxidase [Source:HGNC Symbol;Acc:HGNC:7218]	4353	P05164	ENSG00000005381	protein_coding	0.215196	0.00862596	0.0243034	0.354932	0.722641
PON1	paraoxonase 1 [Source:HGNC Symbol;Acc:HGNC:9204]	5444	P27169	ENSG00000005421	protein_coding	8.95233	0.0956403	0.123108	0.778411	0.436327	0.777455
GCFC2	GC-rich sequence DNA-binding factor 2 [Source:HGNC Symbol;Acc:HGNC:1317]	6936		ENSG00000005436	protein_coding	511.482	0.0264131	0.0852082	0.309988	0.75657	0.929055
WDR54	WD repeat domain 54 [Source:HGNC Symbol;Acc:HGNC:25770]	84058		ENSG00000005448	protein_coding	135.758	0.141893	0.131582	1.07878	0.280684	0.637855
CROT	carnitine O-octanoyltransferase [Source:HGNC Symbol;Acc:HGNC:2366]	54677	Q9UKG9	ENSG00000005469	protein_coding	246.291	-0.23594	0.113182	-2.08359	0.0371977	0.188409
ABCB4	ATP binding cassette subfamily B member 4 [Source:HGNC Symbol;Acc:HGNC:45]	5244		ENSG00000005471	protein_coding	7.29275	0.235302	0.113756	2.10189	0.0355626	0.182564
KMT2E	lysine methyltransferase 2E [Source:HGNC Symbol;Acc:HGNC:18541]	55904	Q8IZD2	ENSG00000005483	protein_coding	548.736	0.0232948	0.082137	0.283619	0.776703	0.935825
RHBDD2	rhomboid domain containing 2 [Source:HGNC Symbol;Acc:HGNC:23082]	57414	Q6NTF9	ENSG00000005486	protein_coding	253.059	0.211014	0.107627	1.96099	0.0498797	0.227827
SOX8	SRY-box 8 [Source:HGNC Symbol;Acc:HGNC:11203]	30812	P57073	ENSG00000005513	protein_coding	0.285343	-0.00939388	0.0254535	-0.362042	0.717321
IBTK	inhibitor of Bruton tyrosine kinase [Source:HGNC Symbol;Acc:HGNC:17853]	25998	Q9P2D0	ENSG00000005700	protein_coding	3419.81	0.096938	0.0492003	1.97028	0.0488058	0.224797
ZNF195	zinc finger protein 195 [Source:HGNC Symbol;Acc:HGNC:12986]	7748		ENSG00000005801	protein_coding	495.44	-0.0492019	0.086327	-0.569901	0.568745	0.85507
MYCBP2	MYC binding protein 2, E3 ubiquitin protein ligase [Source:HGNC Symbol;Acc:HGNC:23386]	23077	O75592	ENSG00000005810	protein_coding	1477.44	0.0556379	0.0616797	0.902047	0.367032	0.721909
FBXL3	F-box and leucine rich repeat protein 3 [Source:HGNC Symbol;Acc:HGNC:13599]	26224	Q9UKT7	ENSG00000005812	protein_coding	1266.48	0.166243	0.0635403	2.61643	0.00888556	0.0661078
ITGAL	integrin subunit alpha L [Source:HGNC Symbol;Acc:HGNC:6148]	3683	P20701	ENSG00000005844	protein_coding	3.21827	0.0591097	0.0824802	0.727147	0.467136
PDK2	pyruvate dehydrogenase kinase 2 [Source:HGNC Symbol;Acc:HGNC:8810]	5164	Q15119	ENSG00000005882	protein_coding	239.07	-0.155894	0.110903	-1.40525	0.159948	0.469659
ITGA3	integrin subunit alpha 3 [Source:HGNC Symbol;Acc:HGNC:6139]	3675		ENSG00000005884	protein_coding	3275.84	0.0591441	0.053305	1.10955	0.267193	0.621052
ZFX	zinc finger protein, X-linked [Source:HGNC Symbol;Acc:HGNC:12869]	7543		ENSG00000005889	protein_coding	2161.75	0.0397944	0.0560973	0.709394	0.47808	0.803122
LAMP2	lysosomal associated membrane protein 2 [Source:HGNC Symbol;Acc:HGNC:6501]	3920	P13473	ENSG00000005893	protein_coding	3623.49	-0.213827	0.0505008	-4.23397	2.29605e-05	0.000469417
ITGA2B	integrin subunit alpha 2b [Source:HGNC Symbol;Acc:HGNC:6138]	3674		ENSG00000005961	protein_coding	10.4769	0.244086	0.129437	1.89857	0.0576211	0.25033
ASB4	ankyrin repeat and SOCS box containing 4 [Source:HGNC Symbol;Acc:HGNC:16009]	51666	Q9Y574	ENSG00000005981	protein_coding	1.25856	-0.00898956	0.0568204	-0.157762	0.874644
GDE1	glycerophosphodiester phosphodiesterase 1 [Source:HGNC Symbol;Acc:HGNC:29644]	51573	Q9NZC3	ENSG00000006007	protein_coding	2022.38	-0.216894	0.0636734	-3.4062	0.000658736	0.0083757
REX1BD	required for excision 1-B domain containing [Source:HGNC Symbol;Acc:HGNC:26098]	55049	Q96EN9	ENSG00000006015	protein_coding	1044.44	-0.213881	0.0684906	-3.12232	0.00179435	0.0189848
CRLF1	cytokine receptor like factor 1 [Source:HGNC Symbol;Acc:HGNC:2364]	9244	O75462	ENSG00000006016	protein_coding	9.93238	0.0244111	0.128448	0.190353	0.849032	0.958152
OSBPL7	oxysterol binding protein like 7 [Source:HGNC Symbol;Acc:HGNC:16387]	114881	Q9BZF2	ENSG00000006025	protein_coding	260.541	-0.181638	0.10772	-1.68538	0.091915	0.337195
TMEM98	transmembrane protein 98 [Source:HGNC Symbol;Acc:HGNC:24529]	26022	Q9Y2Y6	ENSG00000006042	protein_coding	0.357867	0.00442381	0.0299821	0.147551	0.882697
YBX2	Y-box binding protein 2 [Source:HGNC Symbol;Acc:HGNC:17948]	51087	Q9Y2T7	ENSG00000006047	protein_coding	0.400409	0.0203054	0.0288697	0.701584	0.482938
KRT33A	keratin 33A [Source:HGNC Symbol;Acc:HGNC:6450]	3883	O76009	ENSG00000006059	protein_coding	0
MAP3K14	mitogen-activated protein kinase kinase kinase 14 [Source:HGNC Symbol;Acc:HGNC:6853]	9020	Q99558	ENSG00000006062	protein_coding	123.033	0.0111261	0.13813	0.0805223	0.935822	0.983949
ABCC8	ATP binding cassette subfamily C member 8 [Source:HGNC Symbol;Acc:HGNC:59]	6833		ENSG00000006071	protein_coding	0.821595	0.0218977	0.0454988	0.481478	0.630177
CACNG3	calcium voltage-gated channel auxiliary subunit gamma 3 [Source:HGNC Symbol;Acc:HGNC:1407]	10368	O60359	ENSG00000006116	protein_coding	0
TMEM132A	transmembrane protein 132A [Source:HGNC Symbol;Acc:HGNC:31092]	54972		ENSG00000006118	protein_coding	848.706	-0.103103	0.0752744	-1.36963	0.170801	0.48819
AP2B1	adaptor related protein complex 2 beta 1 subunit [Source:HGNC Symbol;Acc:HGNC:563]	163		ENSG00000006125	protein_coding	2006.85	0.114998	0.0639258	1.79894	0.0720288	0.290838
TAC1	tachykinin precursor 1 [Source:HGNC Symbol;Acc:HGNC:11517]	6863	P20366	ENSG00000006128	protein_coding	0
ZNF263	zinc finger protein 263 [Source:HGNC Symbol;Acc:HGNC:13056]	10127		ENSG00000006194	protein_coding	1135.99	-0.0148941	0.0703209	-0.211805	0.832259	0.953162
CX3CL1	C-X3-C motif chemokine ligand 1 [Source:HGNC Symbol;Acc:HGNC:10647]	6376	P78423	ENSG00000006210	protein_coding	71.3951	-0.383074	0.150452	-2.53886	0.0111214	0.0777564
SPATA20	spermatogenesis associated 20 [Source:HGNC Symbol;Acc:HGNC:26125]	64847		ENSG00000006282	protein_coding	1441.59	-0.180074	0.0595466	-3.02383	0.00249597	0.0249042
CACNA1G	calcium voltage-gated channel subunit alpha1 G [Source:HGNC Symbol;Acc:HGNC:1394]	8913	O43497	ENSG00000006283	protein_coding	1.84793	0.1021	0.0612387	1.93936	0.0524574
TNFRSF12A	TNF receptor superfamily member 12A [Source:HGNC Symbol;Acc:HGNC:18152]	51330		ENSG00000006327	protein_coding	419.944	0.0600225	0.100912	0.594859	0.551938	0.845546
DLX6	distal-less homeobox 6 [Source:HGNC Symbol;Acc:HGNC:2919]	1750	P56179	ENSG00000006377	protein_coding	0.528178	0.0312935	0.0320819	0.925913	0.354491
MAP3K9	mitogen-activated protein kinase kinase kinase 9 [Source:HGNC Symbol;Acc:HGNC:6861]	4293	P80192	ENSG00000006432	protein_coding	772.111	-0.18858	0.0820623	-2.29771	0.0215783	0.128378
RALA	RAS like proto-oncogene A [Source:HGNC Symbol;Acc:HGNC:9839]	5898	P11233	ENSG00000006451	protein_coding	684.135	0.0502699	0.0894908	0.56171	0.574314	0.855894
BAIAP2L1	BAI1 associated protein 2 like 1 [Source:HGNC Symbol;Acc:HGNC:21649]	55971	Q9UHR4	ENSG00000006453	protein_coding	215.069	0.252536	0.118324	2.13432	0.0328162	0.172747
KDM7A	lysine demethylase 7A [Source:HGNC Symbol;Acc:HGNC:22224]	80853	Q6ZMT4	ENSG00000006459	protein_coding	331.06	-0.0567421	0.100278	-0.565849	0.571497	0.85539
ETV1	ETS variant 1 [Source:HGNC Symbol;Acc:HGNC:3490]	2115	P50549	ENSG00000006468	protein_coding	405.744	0.508824	0.0939542	5.41504	6.12745e-08	2.22737e-06
AGK	acylglycerol kinase [Source:HGNC Symbol;Acc:HGNC:21869]	55750	Q53H12	ENSG00000006530	protein_coding	837.294	0.0498398	0.071089	0.701108	0.483236	0.807359
ALDH3B1	aldehyde dehydrogenase 3 family member B1 [Source:HGNC Symbol;Acc:HGNC:410]	221	P43353	ENSG00000006534	protein_coding	567.731	-0.363597	0.0822728	-4.41683	1.00161e-05	0.000222423
TTC22	tetratricopeptide repeat domain 22 [Source:HGNC Symbol;Acc:HGNC:26067]	55001	Q5TAA0	ENSG00000006555	protein_coding	0
PHTF2	putative homeodomain transcription factor 2 [Source:HGNC Symbol;Acc:HGNC:13411]	57157	Q8N3S3	ENSG00000006576	protein_coding	556.961	-0.0806605	0.0860624	-0.937169	0.348672	0.706111
CCL26	C-C motif chemokine ligand 26 [Source:HGNC Symbol;Acc:HGNC:10625]	10344	Q9Y258	ENSG00000006606	protein_coding	5.54879	0.248759	0.101051	2.57306	0.0100804	0.0724438
FARP2	FERM, ARH/RhoGEF and pleckstrin domain protein 2 [Source:HGNC Symbol;Acc:HGNC:16460]	9855	O94887	ENSG00000006607	protein_coding	2091.73	0.045599	0.0543732	0.838639	0.401672	0.751329
USH1C	USH1 protein network component harmonin [Source:HGNC Symbol;Acc:HGNC:12597]	10083	Q9Y6N9	ENSG00000006611	protein_coding	0.520594	-0.00601041	0.0338692	-0.173985	0.861877
GGCT	gamma-glutamylcyclotransferase [Source:HGNC Symbol;Acc:HGNC:21705]	79017		ENSG00000006625	protein_coding	348.046	-0.0307965	0.106471	-0.289221	0.772412	0.934443
DBF4	DBF4 zinc finger [Source:HGNC Symbol;Acc:HGNC:17364]	10926	Q9UBU7	ENSG00000006634	protein_coding	472.572	0.134081	0.0908753	1.47547	0.140086	0.436656
TBXA2R	thromboxane A2 receptor [Source:HGNC Symbol;Acc:HGNC:11608]	6915	P21731	ENSG00000006638	protein_coding	4.74209	0.097085	0.0992761	0.980821	0.326681	0.686222
IFRD1	interferon related developmental regulator 1 [Source:HGNC Symbol;Acc:HGNC:5456]	3475		ENSG00000006652	protein_coding	940.045	0.291362	0.0726578	4.01023	6.06605e-05	0.00109458
LGALS14	galectin 14 [Source:HGNC Symbol;Acc:HGNC:30054]	56891	Q8TCE9	ENSG00000006659	protein_coding	0
COX10	COX10, heme A:farnesyltransferase cytochrome c oxidase assembly factor [Source:HGNC Symbol;Acc:HGNC:2260]	1352		ENSG00000006695	protein_coding	235.639	0.00372385	0.114314	0.0325789	0.97401	0.993368
GTF2IRD1	GTF2I repeat domain containing 1 [Source:HGNC Symbol;Acc:HGNC:4661]	9569	Q9UHL9	ENSG00000006704	protein_coding	426.353	0.0688519	0.0924896	0.744465	0.456595	0.789769
PAF1	PAF1 homolog, Paf1/RNA polymerase II complex component [Source:HGNC Symbol;Acc:HGNC:25459]	54623	Q8N7H5	ENSG00000006712	protein_coding	953.228	-0.00584623	0.0745193	-0.0784521	0.937468	0.983986
VPS41	VPS41, HOPS complex subunit [Source:HGNC Symbol;Acc:HGNC:12713]	27072	P49754	ENSG00000006715	protein_coding	3500.38	-0.130484	0.0478316	-2.72793	0.00637341	0.0512947
ARHGAP44	Rho GTPase activating protein 44 [Source:HGNC Symbol;Acc:HGNC:29096]	9912	Q17R89	ENSG00000006740	protein_coding	3.48879	-0.0478262	0.0861467	-0.560318	0.575262
ELAC2	elaC ribonuclease Z 2 [Source:HGNC Symbol;Acc:HGNC:14198]	60528	Q9BQ52	ENSG00000006744	protein_coding	1199.59	-0.0840173	0.0635861	-1.32125	0.186419	0.512514
SCIN	scinderin [Source:HGNC Symbol;Acc:HGNC:21695]	85477	Q9Y6U3	ENSG00000006747	protein_coding	2764.98	0.0304763	0.0501431	0.607793	0.543325	0.841164
ARSD	arylsulfatase D [Source:HGNC Symbol;Acc:HGNC:717]	414	P51689	ENSG00000006756	protein_coding	1198.9	-0.210978	0.0666704	-3.16417	0.00155525	0.017028
PNPLA4	patatin like phospholipase domain containing 4 [Source:HGNC Symbol;Acc:HGNC:24887]	8228	P41247	ENSG00000006757	protein_coding	96.165	-0.325504	0.148017	-2.1969	0.0280274	0.154037
MYH13	myosin heavy chain 13 [Source:HGNC Symbol;Acc:HGNC:7571]	8735	Q9UKX3	ENSG00000006788	protein_coding	0.142671	-0.00283079	0.0243034	-0.116473	0.907278
ADIPOR2	adiponectin receptor 2 [Source:HGNC Symbol;Acc:HGNC:24041]	79602	Q86V24	ENSG00000006831	protein_coding	1874.72	-0.00609868	0.0608217	-0.100273	0.920128	0.979944
CDKL3	cyclin dependent kinase like 3 [Source:HGNC Symbol;Acc:HGNC:15483]	51265		ENSG00000006837	protein_coding	14.1881	-0.05629	0.13394	-0.420058	0.674443	0.898694
UPP2	uridine phosphorylase 2 [Source:HGNC Symbol;Acc:HGNC:23061]	151531	O95045	ENSG00000007001	protein_coding	2.81589	-0.0149196	0.0789879	-0.187668	0.851137
PRSS21	serine protease 21 [Source:HGNC Symbol;Acc:HGNC:9485]	10942	Q9Y6M0	ENSG00000007038	protein_coding	4.49011	0.160825	0.0934203	1.77961	0.0751395	0.298282
MARK4	microtubule affinity regulating kinase 4 [Source:HGNC Symbol;Acc:HGNC:13538]	57787		ENSG00000007047	protein_coding	223.705	-0.0213805	0.12462	-0.171533	0.863804	0.961789
PROM1	prominin 1 [Source:HGNC Symbol;Acc:HGNC:9454]	8842		ENSG00000007062	protein_coding	0.200205	0.00862596	0.0243034	0.354932	0.722641
CCDC124	coiled-coil domain containing 124 [Source:HGNC Symbol;Acc:HGNC:25171]	115098	Q96CT7	ENSG00000007080	protein_coding	355.56	-0.23321	0.102777	-2.26809	0.023324	0.135294
CEACAM21	carcinoembryonic antigen related cell adhesion molecule 21 [Source:HGNC Symbol;Acc:HGNC:28834]	90273		ENSG00000007129	protein_coding	0
PAFAH1B1	platelet activating factor acetylhydrolase 1b regulatory subunit 1 [Source:HGNC Symbol;Acc:HGNC:8574]	5048		ENSG00000007168	protein_coding	2616.29	-0.0238815	0.0512216	-0.466239	0.641045	0.88696
NOS2	nitric oxide synthase 2 [Source:HGNC Symbol;Acc:HGNC:7873]	4843	P35228	ENSG00000007171	protein_coding	0.328758	0.00416899	0.0291134	0.143201	0.886132
DNAH9	dynein axonemal heavy chain 9 [Source:HGNC Symbol;Acc:HGNC:2953]	1770	Q9NYC9	ENSG00000007174	protein_coding	0.318731	0.00407857	0.0287987	0.141626	0.887375
KIAA0100	KIAA0100 [Source:HGNC Symbol;Acc:HGNC:28960]	9703	Q14667	ENSG00000007202	protein_coding	3671.34	-0.0824634	0.0490511	-1.68116	0.0927325	0.338846
SLC13A2	solute carrier family 13 member 2 [Source:HGNC Symbol;Acc:HGNC:10917]	9058	Q13183	ENSG00000007216	protein_coding	0.430392	0.0212819	0.0295496	0.746417	0.455416
GAS7	growth arrest specific 7 [Source:HGNC Symbol;Acc:HGNC:4169]	8522	O60861	ENSG00000007237	protein_coding	0.215196	0.00862596	0.0243034	0.354932	0.722641
TRAPPC6A	trafficking protein particle complex 6A [Source:HGNC Symbol;Acc:HGNC:23069]	79090	O75865	ENSG00000007255	protein_coding	328.304	-0.068107	0.104003	-0.654735	0.512639	0.822513
MATK	megakaryocyte-associated tyrosine kinase [Source:HGNC Symbol;Acc:HGNC:6906]	4145	P42679	ENSG00000007264	protein_coding	4.92772	-0.00567991	0.0994928	-0.0572928	0.954312	0.988071
CEACAM7	carcinoembryonic antigen related cell adhesion molecule 7 [Source:HGNC Symbol;Acc:HGNC:1819]	1087	Q14002	ENSG00000007306	protein_coding	0.215196	0.00862596	0.0243034	0.354932	0.722641
CD79B	CD79b molecule [Source:HGNC Symbol;Acc:HGNC:1699]	974	P40259	ENSG00000007312	protein_coding	1.43915	0.0669632	0.0596257	1.16802	0.2428
SCN4A	sodium voltage-gated channel alpha subunit 4 [Source:HGNC Symbol;Acc:HGNC:10591]	6329	P35499	ENSG00000007314	protein_coding	1.92146	0.0544783	0.0633048	0.877077	0.380445
ST7L	suppression of tumorigenicity 7 like [Source:HGNC Symbol;Acc:HGNC:18441]	54879	Q8TDW4	ENSG00000007341	protein_coding	366.109	0.0507385	0.0955579	0.531	0.595419	0.866501
TKTL1	transketolase like 1 [Source:HGNC Symbol;Acc:HGNC:11835]	8277	P51854	ENSG00000007350	protein_coding	0.774089	-0.00394692	0.0444734	-0.0877811	0.930051
PAX6	paired box 6 [Source:HGNC Symbol;Acc:HGNC:8620]	5080	P26367	ENSG00000007372	protein_coding	23.9874	-0.0290445	0.153508	-0.189102	0.850013	0.958432
RPUSD1	RNA pseudouridylate synthase domain containing 1 [Source:HGNC Symbol;Acc:HGNC:14173]	113000	Q9UJJ7	ENSG00000007376	protein_coding	903.626	0.12099	0.0760051	1.59188	0.111412	0.380214
RHBDF1	rhomboid 5 homolog 1 [Source:HGNC Symbol;Acc:HGNC:20561]	64285	Q96CC6	ENSG00000007384	protein_coding	419.868	0.0195508	0.092238	0.211972	0.832129	0.953146
LUC7L	LUC7 like [Source:HGNC Symbol;Acc:HGNC:6723]	55692		ENSG00000007392	protein_coding	1028.37	-0.0723744	0.0665552	-1.08738	0.276868	0.632959
CACNA2D2	calcium voltage-gated channel auxiliary subunit alpha2delta 2 [Source:HGNC Symbol;Acc:HGNC:1400]	9254		ENSG00000007402	protein_coding	8.97575	0.0252405	0.124626	0.202261	0.839713	0.95533
BAIAP3	BAI1 associated protein 3 [Source:HGNC Symbol;Acc:HGNC:948]	8938	O94812	ENSG00000007516	protein_coding	14.2958	0.0182282	0.138853	0.130866	0.895881	0.972838
TSR3	TSR3, acp transferase ribosome maturation factor [Source:HGNC Symbol;Acc:HGNC:14175]	115939	Q9UJK0	ENSG00000007520	protein_coding	948.977	-0.184504	0.0700543	-2.63338	0.00845408	0.0637672
PIGQ	phosphatidylinositol glycan anchor biosynthesis class Q [Source:HGNC Symbol;Acc:HGNC:14135]	9091		ENSG00000007541	protein_coding	778.279	-0.12694	0.0725708	-1.749	0.0802909	0.311096
CRAMP1	cramped chromatin regulator homolog 1 [Source:HGNC Symbol;Acc:HGNC:14122]	57585	Q96RY5	ENSG00000007545	protein_coding	361.625	-0.0126234	0.101401	-0.124476	0.900938	0.974223
TEAD3	TEA domain transcription factor 3 [Source:HGNC Symbol;Acc:HGNC:11716]	7005		ENSG00000007866	protein_coding	194.878	-0.129984	0.123192	-1.05501	0.291419	0.650182
SELE	selectin E [Source:HGNC Symbol;Acc:HGNC:10718]	6401		ENSG00000007908	protein_coding	0.715734	0.00821221	0.0382181	0.218102	0.82735
DNAJC11	DnaJ heat shock protein family (Hsp40) member C11 [Source:HGNC Symbol;Acc:HGNC:25570]	55735		ENSG00000007923	protein_coding	1384.43	-0.0910543	0.0619175	-1.47053	0.141418	0.439166
FMO3	flavin containing monooxygenase 3 [Source:HGNC Symbol;Acc:HGNC:3771]	2328	P31513	ENSG00000007933	protein_coding	0.615605	0.0401342	0.0360768	1.12278	0.26153
MYLIP	myosin regulatory light chain interacting protein [Source:HGNC Symbol;Acc:HGNC:21155]	29116	Q8WY64	ENSG00000007944	protein_coding	166.271	0.254775	0.124158	2.05232	0.040139	0.197772
NOX1	NADPH oxidase 1 [Source:HGNC Symbol;Acc:HGNC:7889]	27035	Q9Y5S8	ENSG00000007952	protein_coding	4.49597	0.00868463	0.0980698	0.0881701	0.929741	0.982444
E2F2	E2F transcription factor 2 [Source:HGNC Symbol;Acc:HGNC:3114]	1870	Q14209	ENSG00000007968	protein_coding	80.5129	0.111865	0.148716	0.752367	0.45183	0.787165
PSMB1	proteasome subunit beta 1 [Source:HGNC Symbol;Acc:HGNC:9537]	5689	P20618	ENSG00000008018	protein_coding	2396.26	-0.045197	0.0576919	-0.783411	0.433386	0.775306
SYN1	synapsin I [Source:HGNC Symbol;Acc:HGNC:11494]	6853	P17600	ENSG00000008056	protein_coding	2.85031	0.173639	0.0800198	2.25784	0.0239553
JARID2	jumonji and AT-rich interaction domain containing 2 [Source:HGNC Symbol;Acc:HGNC:6196]	3720	Q92833	ENSG00000008083	protein_coding	1588	0.105095	0.0631024	1.66554	0.0958054	0.34613
CDKL5	cyclin dependent kinase like 5 [Source:HGNC Symbol;Acc:HGNC:11411]	6792	O76039	ENSG00000008086	protein_coding	3514.98	-0.130577	0.0547356	-2.38558	0.0170524	0.107318
CAMK1G	calcium/calmodulin dependent protein kinase IG [Source:HGNC Symbol;Acc:HGNC:14585]	57172	Q96NX5	ENSG00000008118	protein_coding	0
CDK11A	cyclin dependent kinase 11A [Source:HGNC Symbol;Acc:HGNC:1730]	728642		ENSG00000008128	protein_coding	14.827	0.072404	0.14252	0.508577	0.611049	0.874133
NADK	NAD kinase [Source:HGNC Symbol;Acc:HGNC:29831]	65220	O95544	ENSG00000008130	protein_coding	933.433	0.0171056	0.0701695	0.24378	0.807401	0.946444
TFAP2B	transcription factor AP-2 beta [Source:HGNC Symbol;Acc:HGNC:11743]	7021		ENSG00000008196	protein_coding	1.76798	-0.037449	0.0611785	-0.626756	0.530819
TFAP2D	transcription factor AP-2 delta [Source:HGNC Symbol;Acc:HGNC:15581]	83741	Q7Z6R9	ENSG00000008197	protein_coding	0
DLEC1	deleted in lung and esophageal cancer 1 [Source:HGNC Symbol;Acc:HGNC:2899]	9940	Q9Y238	ENSG00000008226	protein_coding	20.8507	0.507741	0.148364	3.44207	0.000577285	0.00747016
CYTH3	cytohesin 3 [Source:HGNC Symbol;Acc:HGNC:9504]	9265	O43739	ENSG00000008256	protein_coding	5482.61	-0.117996	0.0471599	-2.50202	0.0123488	0.0837752
ADAM22	ADAM metallopeptidase domain 22 [Source:HGNC Symbol;Acc:HGNC:201]	53616	Q9P0K1	ENSG00000008277	protein_coding	312.427	-0.140764	0.108989	-1.29122	0.196626	0.527285
SYPL1	synaptophysin like 1 [Source:HGNC Symbol;Acc:HGNC:11507]	6856	Q16563	ENSG00000008282	protein_coding	589.62	-0.148059	0.0826919	-1.79017	0.0734263	0.294529
CYB561	cytochrome b561 [Source:HGNC Symbol;Acc:HGNC:2571]	1534	P49447	ENSG00000008283	protein_coding	1623.97	0.0531223	0.0568499	0.934449	0.350072	0.707232
SPAG9	sperm associated antigen 9 [Source:HGNC Symbol;Acc:HGNC:14524]	9043	O60271	ENSG00000008294	protein_coding	4642.17	-0.0458467	0.0433234	-1.05824	0.289946	0.649136
CELSR3	cadherin EGF LAG seven-pass G-type receptor 3 [Source:HGNC Symbol;Acc:HGNC:3230]	1951	Q9NYQ7	ENSG00000008300	protein_coding	71.2048	-0.0450341	0.150416	-0.299407	0.76463	0.931976
AASS	aminoadipate-semialdehyde synthase [Source:HGNC Symbol;Acc:HGNC:17366]	10157	Q9UDR5	ENSG00000008311	protein_coding	356.59	-0.113651	0.0963872	-1.17891	0.238432	0.58762
PLEKHG6	pleckstrin homology and RhoGEF domain containing G6 [Source:HGNC Symbol;Acc:HGNC:25562]	55200	Q3KR16	ENSG00000008323	protein_coding	8.59543	0.038432	0.122251	0.315561	0.752335	0.928068
SS18L2	SS18 like 2 [Source:HGNC Symbol;Acc:HGNC:15593]	51188	Q9UHA2	ENSG00000008324	protein_coding	208.029	0.165372	0.115432	1.43282	0.151909	0.457242
MPND	MPN domain containing [Source:HGNC Symbol;Acc:HGNC:25934]	84954	Q8N594	ENSG00000008382	protein_coding	139.259	-0.117594	0.133733	-0.879187	0.3793	0.732566
MGST1	microsomal glutathione S-transferase 1 [Source:HGNC Symbol;Acc:HGNC:7061]	4257		ENSG00000008394	protein_coding	805.342	-0.216631	0.0843208	-2.56868	0.0102088	0.0730073
CRY1	cryptochrome circadian regulator 1 [Source:HGNC Symbol;Acc:HGNC:2384]	1407	Q16526	ENSG00000008405	protein_coding	871.845	0.095702	0.0704921	1.35767	0.174568	0.493638
PGLYRP1	peptidoglycan recognition protein 1 [Source:HGNC Symbol;Acc:HGNC:8904]	8993	O75594	ENSG00000008438	protein_coding	2.15043	0.0185878	0.0708374	0.262162	0.793197
NFIX	nuclear factor I X [Source:HGNC Symbol;Acc:HGNC:7788]	4784	Q14938	ENSG00000008441	protein_coding	146.311	0.150953	0.129357	1.16722	0.243123	0.592292
ST3GAL1	ST3 beta-galactoside alpha-2,3-sialyltransferase 1 [Source:HGNC Symbol;Acc:HGNC:10862]	6482	Q11201	ENSG00000008513	protein_coding	145.267	0.076658	0.131808	0.581836	0.560677	0.849941
MMP25	matrix metallopeptidase 25 [Source:HGNC Symbol;Acc:HGNC:14246]	64386	Q9NPA2	ENSG00000008516	protein_coding	1.50048	-0.046555	0.0574627	-0.842303	0.399618
IL32	interleukin 32 [Source:HGNC Symbol;Acc:HGNC:16830]	9235	P24001	ENSG00000008517	protein_coding	38.3901	-0.161919	0.157898	-1.02447	0.305614	0.664186
PKD1	polycystin 1, transient receptor potential channel interacting [Source:HGNC Symbol;Acc:HGNC:9008]	5310	P98161	ENSG00000008710	protein_coding	1249.28	0.0368958	0.0704587	0.523654	0.600519	0.868237
MAPK8IP2	mitogen-activated protein kinase 8 interacting protein 2 [Source:HGNC Symbol;Acc:HGNC:6883]	23542	Q13387	ENSG00000008735	protein_coding	1.80222	-0.0122168	0.0646065	-0.190816	0.848669
MED24	mediator complex subunit 24 [Source:HGNC Symbol;Acc:HGNC:22963]	9862		ENSG00000008838	protein_coding	970.435	-0.0587283	0.0686649	-0.855266	0.392404	0.743437
RHOBTB2	Rho related BTB domain containing 2 [Source:HGNC Symbol;Acc:HGNC:18756]	23221	Q9BYZ6	ENSG00000008853	protein_coding	159.647	0.0946524	0.129521	0.730684	0.464972	0.794783
HEATR5B	HEAT repeat containing 5B [Source:HGNC Symbol;Acc:HGNC:29273]	54497		ENSG00000008869	protein_coding	1256.86	-0.0203475	0.0611536	-0.332726	0.739341	0.924097
SEC62	SEC62 homolog, preprotein translocation factor [Source:HGNC Symbol;Acc:HGNC:11846]	7095	Q99442	ENSG00000008952	protein_coding	3231.2	0.0143329	0.0486856	0.294396	0.768455	0.933232
RPS20	ribosomal protein S20 [Source:HGNC Symbol;Acc:HGNC:10405]	6224	P60866	ENSG00000008988	protein_coding	16409.6	-0.060878	0.0599068	-1.01621	0.30953	0.668228
CSDE1	cold shock domain containing E1 [Source:HGNC Symbol;Acc:HGNC:29905]	7812	O75534	ENSG00000009307	protein_coding	18854.6	0.0145002	0.03729	0.388849	0.697388	0.907998
UBE3C	ubiquitin protein ligase E3C [Source:HGNC Symbol;Acc:HGNC:16803]	9690	Q15386	ENSG00000009335	protein_coding	6554.38	0.0692447	0.0398438	1.73791	0.0822264	0.315302
REV3L	REV3 like, DNA directed polymerase zeta catalytic subunit [Source:HGNC Symbol;Acc:HGNC:9968]	5980		ENSG00000009413	protein_coding	857.94	0.2967	0.0792766	3.74265	0.000182087	0.00284091
TENM1	teneurin transmembrane protein 1 [Source:HGNC Symbol;Acc:HGNC:8117]	10178	Q9UKZ4	ENSG00000009694	protein_coding	120.746	-0.142495	0.137709	-1.03425	0.30102	0.659117
PAX7	paired box 7 [Source:HGNC Symbol;Acc:HGNC:8621]	5081	P23759	ENSG00000009709	protein_coding	0.142671	-0.00283079	0.0243034	-0.116473	0.907278
MASP2	mannan binding lectin serine peptidase 2 [Source:HGNC Symbol;Acc:HGNC:6902]	10747	O00187	ENSG00000009724	protein_coding	8.26052	0.101482	0.122327	0.830472	0.406272	0.754776
IYD	iodotyrosine deiodinase [Source:HGNC Symbol;Acc:HGNC:21071]	389434	Q6PHW0	ENSG00000009765	protein_coding	0
FAM76A	family with sequence similarity 76 member A [Source:HGNC Symbol;Acc:HGNC:28530]	199870	Q8TAV0	ENSG00000009780	protein_coding	245.162	-0.138919	0.112525	-1.2342	0.217129	0.557166
TRAF3IP3	TRAF3 interacting protein 3 [Source:HGNC Symbol;Acc:HGNC:30766]	80342		ENSG00000009790	protein_coding	0.789866	-0.0272804	0.0450456	-0.651915	0.514456
POMT2	protein O-mannosyltransferase 2 [Source:HGNC Symbol;Acc:HGNC:19743]	29954	Q9UKY4	ENSG00000009830	protein_coding	578.592	-0.0958666	0.0843489	-1.13648	0.255757	0.60711
VTA1	vesicle trafficking 1 [Source:HGNC Symbol;Acc:HGNC:20954]	51534	Q9NP79	ENSG00000009844	protein_coding	1095.76	0.100346	0.0668836	1.50038	0.133515	0.425082
MLXIPL	MLX interacting protein like [Source:HGNC Symbol;Acc:HGNC:12744]	51085	Q9NP71	ENSG00000009950	protein_coding	0.876802	0.0227605	0.0463454	0.498199	0.618344
BAZ1B	bromodomain adjacent to zinc finger domain 1B [Source:HGNC Symbol;Acc:HGNC:961]	9031	Q9UIG0	ENSG00000009954	protein_coding	2320.83	0.0459083	0.0509376	0.90127	0.367445	0.722413
RANBP9	RAN binding protein 9 [Source:HGNC Symbol;Acc:HGNC:13727]	10048	Q96S59	ENSG00000010017	protein_coding	939.764	0.0175232	0.068033	0.257571	0.796738	0.94297
ETV7	ETS variant 7 [Source:HGNC Symbol;Acc:HGNC:18160]	51513	Q9Y603	ENSG00000010030	protein_coding	2.112	-0.0110581	0.0725433	-0.152885	0.878489
SPRTN	SprT-like N-terminal domain [Source:HGNC Symbol;Acc:HGNC:25356]	83932	Q9H040	ENSG00000010072	protein_coding	615.69	0.128643	0.0861591	1.4932	0.135384	0.428274
METTL13	methyltransferase like 13 [Source:HGNC Symbol;Acc:HGNC:24248]	51603	Q8N6R0	ENSG00000010165	protein_coding	1592.29	0.000215723	0.0568596	0.00379363	0.996973	0.999447
DYRK4	dual specificity tyrosine phosphorylation regulated kinase 4 [Source:HGNC Symbol;Acc:HGNC:3095]	8798		ENSG00000010219	protein_coding	298.967	-0.208082	0.106215	-1.95828	0.0501974	0.228801
ZNF207	zinc finger protein 207 [Source:HGNC Symbol;Acc:HGNC:12998]	7756	O43670	ENSG00000010244	protein_coding	3408.6	0.102728	0.0456153	2.25207	0.0243179	0.139422
UQCRC1	ubiquinol-cytochrome c reductase core protein 1 [Source:HGNC Symbol;Acc:HGNC:12585]	7384	P31930	ENSG00000010256	protein_coding	3412.07	0.0101524	0.0494731	0.20521	0.837408	0.954663
STARD3NL	STARD3 N-terminal like [Source:HGNC Symbol;Acc:HGNC:19169]	83930	O95772	ENSG00000010270	protein_coding	2709.03	0.238327	0.0555825	4.28788	1.80384e-05	0.000376251
CD9	CD9 molecule [Source:HGNC Symbol;Acc:HGNC:1709]	928	P21926	ENSG00000010278	protein_coding	7.33101	0.133165	0.117215	1.13933	0.254566	0.605659
HHATL	hedgehog acyltransferase like [Source:HGNC Symbol;Acc:HGNC:13242]	57467		ENSG00000010282	protein_coding	0.376264	0.0227081	0.0305146	0.719179	0.47203
NCAPD2	non-SMC condensin I complex subunit D2 [Source:HGNC Symbol;Acc:HGNC:24305]	9918	Q15021	ENSG00000010292	protein_coding	3730.58	0.0125299	0.0604663	0.207219	0.835838	0.954295
IFFO1	intermediate filament family orphan 1 [Source:HGNC Symbol;Acc:HGNC:24970]	25900		ENSG00000010295	protein_coding	488.298	-0.108217	0.0873894	-1.23812	0.215672	0.555524
GIPR	gastric inhibitory polypeptide receptor [Source:HGNC Symbol;Acc:HGNC:4271]	2696	P48546	ENSG00000010310	protein_coding	10.9273	0.178558	0.127188	1.40557	0.159851	0.469529
PHF7	PHD finger protein 7 [Source:HGNC Symbol;Acc:HGNC:18458]	51533	Q9BWX1	ENSG00000010318	protein_coding	16.8726	-0.0725143	0.143317	-0.506457	0.612536	0.874317
SEMA3G	semaphorin 3G [Source:HGNC Symbol;Acc:HGNC:30400]	56920	Q9NS98	ENSG00000010319	protein_coding	5.90419	0.016633	0.106714	0.155673	0.876291	0.96651
NISCH	nischarin [Source:HGNC Symbol;Acc:HGNC:18006]	11188	Q9Y2I1	ENSG00000010322	protein_coding	1065.44	-0.181769	0.0667503	-2.72286	0.00647197	0.051921
STAB1	stabilin 1 [Source:HGNC Symbol;Acc:HGNC:18628]	23166	Q9NY15	ENSG00000010327	protein_coding	27.6393	0.4181	0.148694	2.82332	0.00475295	0.0409379
FUZ	fuzzy planar cell polarity protein [Source:HGNC Symbol;Acc:HGNC:26219]	80199		ENSG00000010361	protein_coding	74.0765	-0.0741436	0.151379	-0.489558	0.624447	0.879963
SLC6A13	solute carrier family 6 member 13 [Source:HGNC Symbol;Acc:HGNC:11046]	6540	Q9NSD5	ENSG00000010379	protein_coding	179.328	-0.425404	0.122131	-3.47671	0.000507606	0.0067428
IDS	iduronate 2-sulfatase [Source:HGNC Symbol;Acc:HGNC:5389]	3423	P22304	ENSG00000010404	protein_coding	326.27	0.033904	0.105217	0.32229	0.747233	0.927083
PRSS3	serine protease 3 [Source:HGNC Symbol;Acc:HGNC:9486]	5646	P35030	ENSG00000010438	protein_coding	0.269272	-0.0106743	0.0271206	-0.366322	0.714125
ZNF200	zinc finger protein 200 [Source:HGNC Symbol;Acc:HGNC:12993]	7752	P98182	ENSG00000010539	protein_coding	324.024	0.111741	0.0999858	1.11771	0.263691	0.616215
CD4	CD4 molecule [Source:HGNC Symbol;Acc:HGNC:1678]	920	P01730	ENSG00000010610	protein_coding	0.318731	0.00407857	0.0287987	0.141626	0.887375
LRRC23	leucine rich repeat containing 23 [Source:HGNC Symbol;Acc:HGNC:19138]	10233		ENSG00000010626	protein_coding	123.799	-0.454248	0.135874	-3.33423	0.000855355	0.0104364
BTK	Bruton tyrosine kinase [Source:HGNC Symbol;Acc:HGNC:1133]	695	Q06187	ENSG00000010671	protein_coding	3.35013	0.0736505	0.0853065	0.87377	0.382243
HFE	hemochromatosis [Source:HGNC Symbol;Acc:HGNC:4886]	3077	Q30201	ENSG00000010704	protein_coding	430.629	-0.0705194	0.0953765	-0.739251	0.459755	0.790905
SCMH1	Scm polycomb group protein homolog 1 [Source:HGNC Symbol;Acc:HGNC:19003]	22955	Q96GD3	ENSG00000010803	protein_coding	502.775	-0.0149379	0.0882933	-0.169195	0.865644	0.962545
FYN	FYN proto-oncogene, Src family tyrosine kinase [Source:HGNC Symbol;Acc:HGNC:4037]	2534	P06241	ENSG00000010810	protein_coding	2.41237	0.0782976	0.0761492	1.04019	0.29825
HIVEP2	human immunodeficiency virus type I enhancer binding protein 2 [Source:HGNC Symbol;Acc:HGNC:4921]	3097	P31629	ENSG00000010818	protein_coding	219.457	0.154296	0.12123	1.27295	0.203036	0.53769
FMO1	flavin containing monooxygenase 1 [Source:HGNC Symbol;Acc:HGNC:3769]	2326	Q01740	ENSG00000010932	protein_coding	18.1564	-0.0624922	0.146726	-0.426296	0.669892	0.89731
ELOA	elongin A [Source:HGNC Symbol;Acc:HGNC:11620]	6924	Q14241	ENSG00000011007	protein_coding	1036.62	0.23296	0.0658486	3.53803	0.000403119	0.00554399
LYPLA2	lysophospholipase II [Source:HGNC Symbol;Acc:HGNC:6738]	11313	O95372	ENSG00000011009	protein_coding	1058.05	-0.0338813	0.0679145	-0.498878	0.617865	0.876722
CLCN6	chloride voltage-gated channel 6 [Source:HGNC Symbol;Acc:HGNC:2024]	1185	P51797	ENSG00000011021	protein_coding	217.924	-0.167675	0.118878	-1.40967	0.158639	0.46747
MRC2	mannose receptor C type 2 [Source:HGNC Symbol;Acc:HGNC:16875]	9902	Q9UBG0	ENSG00000011028	protein_coding	3927.63	-0.385757	0.0547574	-7.04433	1.8636e-12	1.47082e-10
NME1-NME2	NME1-NME2 readthrough [Source:HGNC Symbol;Acc:HGNC:33531]	654364		ENSG00000011052	protein_coding	0
SLC6A7	solute carrier family 6 member 7 [Source:HGNC Symbol;Acc:HGNC:11054]	6534	Q99884	ENSG00000011083	protein_coding	2.26887	0.130204	0.072692	1.87694	0.0605262
TSPAN9	tetraspanin 9 [Source:HGNC Symbol;Acc:HGNC:21640]	10867		ENSG00000011105	protein_coding	549.686	-0.0395885	0.0814887	-0.485794	0.627113	0.881778
BTBD7	BTB domain containing 7 [Source:HGNC Symbol;Acc:HGNC:18269]	55727		ENSG00000011114	protein_coding	959.648	-0.0504236	0.0729064	-0.691614	0.489179	0.810284
APBA3	amyloid beta precursor protein binding family A member 3 [Source:HGNC Symbol;Acc:HGNC:580]	9546	O96018	ENSG00000011132	protein_coding	190.679	-0.0128186	0.121866	-0.105182	0.916232	0.978681
MKS1	Meckel syndrome, type 1 [Source:HGNC Symbol;Acc:HGNC:7121]	54903	Q9NXB0	ENSG00000011143	protein_coding	554.032	-0.21475	0.0822792	-2.60932	0.00907219	0.0670551
ABHD5	abhydrolase domain containing 5 [Source:HGNC Symbol;Acc:HGNC:21396]	51099		ENSG00000011198	protein_coding	280.826	0.078309	0.105225	0.744329	0.456678	0.789769
ANOS1	anosmin 1 [Source:HGNC Symbol;Acc:HGNC:6211]	3730	P23352	ENSG00000011201	protein_coding	0.152699	-0.00283079	0.0243034	-0.116473	0.907278
AKAP8L	A-kinase anchoring protein 8 like [Source:HGNC Symbol;Acc:HGNC:29857]	26993	Q9ULX6	ENSG00000011243	protein_coding	1089.16	-0.0276121	0.0647108	-0.426695	0.669601	0.897195
MBTD1	mbt domain containing 1 [Source:HGNC Symbol;Acc:HGNC:19866]	54799	Q05BQ5	ENSG00000011258	protein_coding	889.954	-0.0677479	0.0685849	-0.987757	0.323272	0.682112
UTP18	UTP18, small subunit processome component [Source:HGNC Symbol;Acc:HGNC:24274]	51096	Q9Y5J1	ENSG00000011260	protein_coding	1582.02	0.0826081	0.0603459	1.36893	0.171021	0.48854
RNF216	ring finger protein 216 [Source:HGNC Symbol;Acc:HGNC:21698]	54476	Q9NWF9	ENSG00000011275	protein_coding	2076.48	0.0937444	0.0553628	1.69329	0.0903994	0.333942
TTC19	tetratricopeptide repeat domain 19 [Source:HGNC Symbol;Acc:HGNC:26006]	54902	Q6DKK2	ENSG00000011295	protein_coding	872.452	0.0504479	0.0730661	0.690475	0.489896	0.810532
PTBP1	polypyrimidine tract binding protein 1 [Source:HGNC Symbol;Acc:HGNC:9583]	5725	P26599	ENSG00000011304	protein_coding	4558	0.121357	0.0519723	2.33506	0.0195404	0.11894
DPF1	double PHD fingers 1 [Source:HGNC Symbol;Acc:HGNC:20225]	8193	Q92782	ENSG00000011332	protein_coding	28.7826	0.199478	0.156271	1.27582	0.202017	0.536539
SYT7	synaptotagmin 7 [Source:HGNC Symbol;Acc:HGNC:11514]	9066	O43581	ENSG00000011347	protein_coding	2.22633	0.102855	0.071895	1.48692	0.137036
LARS2	leucyl-tRNA synthetase 2, mitochondrial [Source:HGNC Symbol;Acc:HGNC:17095]	23395	Q15031	ENSG00000011376	protein_coding	582.923	-0.0414544	0.0846766	-0.489521	0.624473	0.879963
PIK3C2A	phosphatidylinositol-4-phosphate 3-kinase catalytic subunit type 2 alpha [Source:HGNC Symbol;Acc:HGNC:8971]	5286	O00443	ENSG00000011405	protein_coding	2213.08	0.0247356	0.0561629	0.440427	0.659628	0.894305
PLAUR	plasminogen activator, urokinase receptor [Source:HGNC Symbol;Acc:HGNC:9053]	5329	Q03405	ENSG00000011422	protein_coding	117.932	0.238941	0.137355	1.7406	0.0817539	0.314194
ANLN	anillin actin binding protein [Source:HGNC Symbol;Acc:HGNC:14082]	54443	Q9NQW6	ENSG00000011426	protein_coding	5847.59	0.0869832	0.0461769	1.88371	0.0596047	0.256215
WIZ	widely interspaced zinc finger motifs [Source:HGNC Symbol;Acc:HGNC:30917]	58525	O95785	ENSG00000011451	protein_coding	361.898	-0.0255178	0.102871	-0.248058	0.804089	0.945316
RABGAP1	RAB GTPase activating protein 1 [Source:HGNC Symbol;Acc:HGNC:17155]	2844	Q9Y3P9	ENSG00000011454	protein_coding	492.496	-0.0416368	0.0858949	-0.484705	0.627886	0.881963
DCN	decorin [Source:HGNC Symbol;Acc:HGNC:2705]	1634	P07585	ENSG00000011465	protein_coding	14.7602	0.142649	0.142522	1.00121	0.316724	0.675297
QPCTL	glutaminyl-peptide cyclotransferase like [Source:HGNC Symbol;Acc:HGNC:25952]	54814	Q9NXS2	ENSG00000011478	protein_coding	272.758	0.242867	0.113118	2.14728	0.031771	0.169112
PPP5C	protein phosphatase 5 catalytic subunit [Source:HGNC Symbol;Acc:HGNC:9322]	5536	P53041	ENSG00000011485	protein_coding	889.321	0.0142763	0.0701721	0.203449	0.838784	0.95499
CEP68	centrosomal protein 68 [Source:HGNC Symbol;Acc:HGNC:29076]	23177	Q76N32	ENSG00000011523	protein_coding	500.445	-0.0411852	0.087341	-0.471541	0.637254	0.885786
MAP4K3	mitogen-activated protein kinase kinase kinase kinase 3 [Source:HGNC Symbol;Acc:HGNC:6865]	8491	Q8IVH8	ENSG00000011566	protein_coding	1068.81	0.0496242	0.0653321	0.759589	0.4475	0.784093
ZBTB32	zinc finger and BTB domain containing 32 [Source:HGNC Symbol;Acc:HGNC:16763]	27033	Q9Y2Y4	ENSG00000011590	protein_coding	6.10146	-0.0726359	0.106459	-0.682918	0.494659	0.814177
TYROBP	TYRO protein tyrosine kinase binding protein [Source:HGNC Symbol;Acc:HGNC:12449]	7305		ENSG00000011600	protein_coding	0
TMEM159	transmembrane protein 159 [Source:HGNC Symbol;Acc:HGNC:30136]	57146		ENSG00000011638	protein_coding	565.43	-0.54347	0.0831763	-6.52717	6.70241e-11	4.16429e-09
GABRA3	gamma-aminobutyric acid type A receptor alpha3 subunit [Source:HGNC Symbol;Acc:HGNC:4077]	2556	P34903	ENSG00000011677	protein_coding	0.367895	0.00450907	0.0302669	0.148979	0.88157
BRCA1	BRCA1, DNA repair associated [Source:HGNC Symbol;Acc:HGNC:1100]	672	P38398	ENSG00000012048	protein_coding	1281.97	0.0347702	0.0661848	0.525342	0.599346	0.867797
ERCC1	ERCC excision repair 1, endonuclease non-catalytic subunit [Source:HGNC Symbol;Acc:HGNC:3433]	2067	P07992	ENSG00000012061	protein_coding	1245.77	-0.0262077	0.0643373	-0.40735	0.683751	0.90272
CD22	CD22 molecule [Source:HGNC Symbol;Acc:HGNC:1643]	933		ENSG00000012124	protein_coding	1.51254	-0.0522597	0.0618991	-0.87566	0.381215
SEMA3B	semaphorin 3B [Source:HGNC Symbol;Acc:HGNC:10724]	7869		ENSG00000012171	protein_coding	48.9859	0.247052	0.156927	1.5746	0.115348	0.388239
MBTPS2	membrane bound transcription factor peptidase, site 2 [Source:HGNC Symbol;Acc:HGNC:15455]	51360	O43462	ENSG00000012174	protein_coding	223.725	-0.218623	0.113564	-1.92391	0.0543661	0.240742
PRICKLE3	prickle planar cell polarity protein 3 [Source:HGNC Symbol;Acc:HGNC:6645]	4007		ENSG00000012211	protein_coding	142.656	-0.15368	0.13181	-1.16525	0.243918	0.593486
LTF	lactotransferrin [Source:HGNC Symbol;Acc:HGNC:6720]	4057	P02788	ENSG00000012223	protein_coding	0
EXTL3	exostosin like glycosyltransferase 3 [Source:HGNC Symbol;Acc:HGNC:3518]	2137		ENSG00000012232	protein_coding	1095.99	0.0521254	0.0661345	0.788176	0.430593	0.773194
NR1H4	nuclear receptor subfamily 1 group H member 4 [Source:HGNC Symbol;Acc:HGNC:7967]	9971	Q96RI1	ENSG00000012504	protein_coding	2.62035	-0.0491622	0.0777235	-0.637804	0.523601
ELOVL5	ELOVL fatty acid elongase 5 [Source:HGNC Symbol;Acc:HGNC:21308]	60481	Q9NYP7	ENSG00000012660	protein_coding	3258.89	-0.0376387	0.052699	-0.714221	0.47509	0.801296
ALOX5	arachidonate 5-lipoxygenase [Source:HGNC Symbol;Acc:HGNC:435]	240	P09917	ENSG00000012779	protein_coding	1.07933	0.0571271	0.0490003	1.27195	0.203393
KDM5D	lysine demethylase 5D [Source:HGNC Symbol;Acc:HGNC:11115]	8284	Q9BY66	ENSG00000012817	protein_coding	0.142671	-0.00283079	0.0243034	-0.116473	0.907278
CALCOCO1	calcium binding and coiled-coil domain 1 [Source:HGNC Symbol;Acc:HGNC:29306]	57658	Q9P1Z2	ENSG00000012822	protein_coding	1205.54	-0.40762	0.0729147	-5.58883	2.28611e-08	8.98092e-07
UBR7	ubiquitin protein ligase E3 component n-recognin 7 (putative) [Source:HGNC Symbol;Acc:HGNC:20344]	55148	Q8N806	ENSG00000012963	protein_coding	535.632	-0.0261718	0.0836177	-0.312983	0.754293	0.928319
MAP4K5	mitogen-activated protein kinase kinase kinase kinase 5 [Source:HGNC Symbol;Acc:HGNC:6867]	11183		ENSG00000012983	protein_coding	658.176	0.0940958	0.0797393	1.18008	0.237969	0.587187
EHD3	EH domain containing 3 [Source:HGNC Symbol;Acc:HGNC:3244]	30845	Q9NZN3	ENSG00000013016	protein_coding	73.2151	-0.0345639	0.151551	-0.228149	0.819531	0.949418
PSMC4	proteasome 26S subunit, ATPase 4 [Source:HGNC Symbol;Acc:HGNC:9551]	5704	P43686	ENSG00000013275	protein_coding	2107.67	0.0914021	0.0607201	1.50533	0.13224	0.422499
MAN2B2	mannosidase alpha class 2B member 2 [Source:HGNC Symbol;Acc:HGNC:29623]	23324	Q9Y2E5	ENSG00000013288	protein_coding	793.032	-0.211649	0.0806176	-2.6249	0.00866748	0.0648156
SLC7A14	solute carrier family 7 member 14 [Source:HGNC Symbol;Acc:HGNC:29326]	57709	Q8TBB6	ENSG00000013293	protein_coding	0.655563	0.00793248	0.0413149	0.191205	0.848365
CLDN11	claudin 11 [Source:HGNC Symbol;Acc:HGNC:8514]	5010	O75508	ENSG00000013297	protein_coding	12.1274	0.271686	0.134125	2.03426	0.0419256	0.203851
SLC25A39	solute carrier family 25 member 39 [Source:HGNC Symbol;Acc:HGNC:24279]	51629	Q9BZJ4	ENSG00000013306	protein_coding	1547.14	-0.128736	0.0573634	-2.24411	0.0248255	0.141361
MVP	major vault protein [Source:HGNC Symbol;Acc:HGNC:7531]	9961		ENSG00000013364	protein_coding	4855.51	-0.209187	0.0470749	-4.44357	8.84783e-06	0.00020159
NUB1	negative regulator of ubiquitin like proteins 1 [Source:HGNC Symbol;Acc:HGNC:17623]	51667		ENSG00000013374	protein_coding	2143.43	0.00699852	0.0553611	0.126417	0.899402	0.973944
PGM3	phosphoglucomutase 3 [Source:HGNC Symbol;Acc:HGNC:8907]	5238		ENSG00000013375	protein_coding	1199.95	0.123222	0.0683425	1.80309	0.0713741	0.289142
RWDD2A	RWD domain containing 2A [Source:HGNC Symbol;Acc:HGNC:21385]	112611	Q9UIY3	ENSG00000013392	protein_coding	176.911	-0.207755	0.123238	-1.68451	0.092084	0.337462
CLK1	CDC like kinase 1 [Source:HGNC Symbol;Acc:HGNC:2068]	1195	P49759	ENSG00000013441	protein_coding	1249.76	0.186347	0.0750771	2.48212	0.0130605	0.0873073
POLR3B	RNA polymerase III subunit B [Source:HGNC Symbol;Acc:HGNC:30348]	55703	Q9NW08	ENSG00000013503	protein_coding	329.306	0.123228	0.103404	1.19174	0.233361	0.580144
ANGEL1	angel homolog 1 [Source:HGNC Symbol;Acc:HGNC:19961]	23357	Q9UNK9	ENSG00000013523	protein_coding	346.69	-0.225382	0.101262	-2.22462	0.0261067	0.146279
RNF14	ring finger protein 14 [Source:HGNC Symbol;Acc:HGNC:10058]	9604		ENSG00000013561	protein_coding	1015.3	-0.0807489	0.0702683	-1.14913	0.250503	0.601983
DNASE1L1	deoxyribonuclease 1 like 1 [Source:HGNC Symbol;Acc:HGNC:2957]	1774	P49184	ENSG00000013563	protein_coding	210.981	-0.161433	0.120501	-1.339	0.180572	0.502364
DDX11	DEAD/H-box helicase 11 [Source:HGNC Symbol;Acc:HGNC:2736]	1663	Q96FC9	ENSG00000013573	protein_coding	566.128	0.0130924	0.0808702	0.161896	0.871388	0.964496
HEBP1	heme binding protein 1 [Source:HGNC Symbol;Acc:HGNC:17176]	50865	Q9NRV9	ENSG00000013583	protein_coding	101.584	-0.194345	0.141072	-1.37639	0.168701	0.485105
GPRC5A	G protein-coupled receptor class C group 5 member A [Source:HGNC Symbol;Acc:HGNC:9836]	9052	Q8NFJ5	ENSG00000013588	protein_coding	1213.56	0.40351	0.0663784	6.07921	1.20773e-09	6.22192e-08
MAMLD1	mastermind like domain containing 1 [Source:HGNC Symbol;Acc:HGNC:2568]	10046	Q13495	ENSG00000013619	protein_coding	114.216	-0.161138	0.141566	-1.13789	0.255165	0.606368
CD6	CD6 molecule [Source:HGNC Symbol;Acc:HGNC:1691]	923	P30203	ENSG00000013725	protein_coding	0.518935	0.0176626	0.0361279	0.493566	0.621612
TACC3	transforming acidic coiled-coil containing protein 3 [Source:HGNC Symbol;Acc:HGNC:11524]	10460		ENSG00000013810	protein_coding	774.499	-0.0490382	0.14247	-0.344178	0.730712	0.921132
UFL1	UFM1 specific ligase 1 [Source:HGNC Symbol;Acc:HGNC:23039]	23376	O94874	ENSG00000014123	protein_coding	831.395	-0.100864	0.0715074	-1.41043	0.158412	0.46747
POLA2	DNA polymerase alpha 2, accessory subunit [Source:HGNC Symbol;Acc:HGNC:30073]	23649	Q14181	ENSG00000014138	protein_coding	479.198	0.0299256	0.0879986	0.340075	0.7338	0.922288
ZC3H3	zinc finger CCCH-type containing 3 [Source:HGNC Symbol;Acc:HGNC:28972]	23144	Q8IXZ2	ENSG00000014164	protein_coding	190.541	0.00815196	0.128077	0.0636504	0.949249	0.986128
CAPN1	calpain 1 [Source:HGNC Symbol;Acc:HGNC:1476]	823		ENSG00000014216	protein_coding	3155.22	0.00807596	0.0517246	0.156133	0.875928	0.96651
ACPP	acid phosphatase, prostate [Source:HGNC Symbol;Acc:HGNC:125]	55	P15309	ENSG00000014257	protein_coding	0
MDH1	malate dehydrogenase 1 [Source:HGNC Symbol;Acc:HGNC:6970]	4190	P40925	ENSG00000014641	protein_coding	4880.32	-0.0853429	0.0436687	-1.95431	0.0506651	0.22996
SLC30A9	solute carrier family 30 member 9 [Source:HGNC Symbol;Acc:HGNC:1329]	10463	Q6PML9	ENSG00000014824	protein_coding	2797.05	-0.0799128	0.0527047	-1.51622	0.129463	0.417046
MTMR11	myotubularin related protein 11 [Source:HGNC Symbol;Acc:HGNC:24307]	10903	A4FU01	ENSG00000014914	protein_coding	113.013	-0.457885	0.137438	-3.32086	0.000897402	0.0108288
COX15	COX15, cytochrome c oxidase assembly homolog [Source:HGNC Symbol;Acc:HGNC:2263]	1355	Q7KZN9	ENSG00000014919	protein_coding	1004.47	-0.142559	0.067415	-2.11445	0.0344768	0.179089
CCDC88C	coiled-coil domain containing 88C [Source:HGNC Symbol;Acc:HGNC:19967]	440193		ENSG00000015133	protein_coding	326.887	-0.0155389	0.100431	-0.154713	0.877048	0.966615
YAF2	YY1 associated factor 2 [Source:HGNC Symbol;Acc:HGNC:17363]	10138	Q8IY57	ENSG00000015153	protein_coding	376.784	0.120125	0.0944154	1.27244	0.203217	0.537754
ZMYND11	zinc finger MYND-type containing 11 [Source:HGNC Symbol;Acc:HGNC:16966]	10771		ENSG00000015171	protein_coding	2234.69	-0.0275516	0.053522	-0.51477	0.606714	0.871402
WAS	Wiskott-Aldrich syndrome [Source:HGNC Symbol;Acc:HGNC:12731]	7454		ENSG00000015285	protein_coding	0.848198	-0.0250641	0.0411662	-0.662426	0.507698
DPEP1	dipeptidase 1 [Source:HGNC Symbol;Acc:HGNC:3002]	1800		ENSG00000015413	protein_coding	74.7711	-0.544562	0.153742	-3.52584	0.000422146	0.00577525
BID	BH3 interacting domain death agonist [Source:HGNC Symbol;Acc:HGNC:1050]	637	P55957	ENSG00000015475	protein_coding	435.99	0.134604	0.0964142	1.39608	0.162691	0.474406
MATR3	matrin 3 [Source:HGNC Symbol;Acc:HGNC:6912]	9782	P43243	ENSG00000015479	protein_coding	167.419	-0.061243	0.124514	-0.491729	0.622911	0.8791
NPC1L1	NPC1 like intracellular cholesterol transporter 1 [Source:HGNC Symbol;Acc:HGNC:7898]	29881	Q9UHC9	ENSG00000015520	protein_coding	2.0859	-0.00959812	0.0717197	-0.133894	0.893487
XYLT2	xylosyltransferase 2 [Source:HGNC Symbol;Acc:HGNC:15517]	64132	Q9H1B5	ENSG00000015532	protein_coding	833.738	-0.211915	0.0766564	-2.76411	0.00570781	0.0469955
RGPD5	RANBP2-like and GRIP domain containing 5 [Source:HGNC Symbol;Acc:HGNC:32418]	84220	Q99666	ENSG00000015568	protein_coding	0.215196	0.00862596	0.0243034	0.354932	0.722641
STMN4	stathmin 4 [Source:HGNC Symbol;Acc:HGNC:16078]	81551	Q9H169	ENSG00000015592	protein_coding	0
NUDCD3	NudC domain containing 3 [Source:HGNC Symbol;Acc:HGNC:22208]	23386	Q8IVD9	ENSG00000015676	protein_coding	2100.04	-0.131321	0.061771	-2.12589	0.0335124	0.175695
ISL1	ISL LIM homeobox 1 [Source:HGNC Symbol;Acc:HGNC:6132]	3670	P61371	ENSG00000016082	protein_coding	4.7274	0.0453509	0.0978753	0.461268	0.644606	0.887982
CHDH	choline dehydrogenase [Source:HGNC Symbol;Acc:HGNC:24288]	55349	Q8NE62	ENSG00000016391	protein_coding	0.914808	-0.0117927	0.0478636	-0.246026	0.805662
IL20RA	interleukin 20 receptor subunit alpha [Source:HGNC Symbol;Acc:HGNC:6003]	53832	Q9UHF4	ENSG00000016402	protein_coding	0.176059	0.00862596	0.0243034	0.354932	0.722641
CLCA1	chloride channel accessory 1 [Source:HGNC Symbol;Acc:HGNC:2015]	1179	A8K7I4	ENSG00000016490	protein_coding	0.215196	0.00862596	0.0243034	0.354932	0.722641
CLCA4	chloride channel accessory 4 [Source:HGNC Symbol;Acc:HGNC:2018]	22802	Q14CN2	ENSG00000016602	protein_coding	0.215196	0.00862596	0.0243034	0.354932	0.722641
GLT8D1	glycosyltransferase 8 domain containing 1 [Source:HGNC Symbol;Acc:HGNC:24870]	55830	Q68CQ7	ENSG00000016864	protein_coding	662.111	-0.150762	0.0790402	-1.90721	0.0564936	0.247284
ATP2C1	ATPase secretory pathway Ca2+ transporting 1 [Source:HGNC Symbol;Acc:HGNC:13211]	27032		ENSG00000017260	protein_coding	2433.78	0.0519927	0.0497424	1.04525	0.295909	0.65404
IGF1	insulin like growth factor 1 [Source:HGNC Symbol;Acc:HGNC:5464]	3479	P05019	ENSG00000017427	protein_coding	1.33026	0.0526143	0.0540113	1.01896	0.308223
SLC38A5	solute carrier family 38 member 5 [Source:HGNC Symbol;Acc:HGNC:18070]	92745	Q8WUX1	ENSG00000017483	protein_coding	56.9214	0.079913	0.155731	0.513122	0.607866	0.872236
RALBP1	ralA binding protein 1 [Source:HGNC Symbol;Acc:HGNC:9841]	10928	Q15311	ENSG00000017797	protein_coding	8020.2	-0.198147	0.0451597	-4.38764	1.14589e-05	0.000251277
RUFY3	RUN and FYVE domain containing 3 [Source:HGNC Symbol;Acc:HGNC:30285]	22902		ENSG00000018189	protein_coding	727.107	-0.0636809	0.0762858	-0.8347	0.403887	0.752499
CNTN1	contactin 1 [Source:HGNC Symbol;Acc:HGNC:2171]	1272	Q12860	ENSG00000018236	protein_coding	16.4576	0.00290453	0.145549	0.0199775	0.984061	0.995583
SLC11A1	solute carrier family 11 member 1 [Source:HGNC Symbol;Acc:HGNC:10907]	6556	P49279	ENSG00000018280	protein_coding	12.9006	0.00904106	0.130253	0.069337	0.944721	0.985672
WWTR1	WW domain containing transcription regulator 1 [Source:HGNC Symbol;Acc:HGNC:24042]	25937	Q9GZV5	ENSG00000018408	protein_coding	5951.97	-0.232032	0.0509256	-4.55621	5.20838e-06	0.000125008
AGPS	alkylglycerone phosphate synthase [Source:HGNC Symbol;Acc:HGNC:327]	8540	O00116	ENSG00000018510	protein_coding	4906.36	-0.114552	0.0454737	-2.51907	0.0117666	0.0808647
				ENSG00000018607		0
CXorf56	chromosome X open reading frame 56 [Source:HGNC Symbol;Acc:HGNC:26239]	63932	Q9H5V9	ENSG00000018610	protein_coding	1002.24	-0.12794	0.0715629	-1.78763	0.0738365	0.295498
ATP1A2	ATPase Na+/K+ transporting subunit alpha 2 [Source:HGNC Symbol;Acc:HGNC:800]	477	P50993	ENSG00000018625	protein_coding	19.4397	-0.086812	0.147627	-0.588171	0.556417	0.847238
TTC27	tetratricopeptide repeat domain 27 [Source:HGNC Symbol;Acc:HGNC:25986]	55622		ENSG00000018699	protein_coding	1229.64	0.497866	0.0709979	7.01214	2.34706e-12	1.83584e-10
ZNF582	zinc finger protein 582 [Source:HGNC Symbol;Acc:HGNC:26421]	147948		ENSG00000018869	protein_coding	0.445331	-0.00454065	0.0344014	-0.128851	0.897476
VSIG2	V-set and immunoglobulin domain containing 2 [Source:HGNC Symbol;Acc:HGNC:17149]	23584	Q96IQ7	ENSG00000019102	protein_coding	1.5638	0.0578896	0.061718	0.952654	0.340765
PHLDB1	pleckstrin homology like domain family B member 1 [Source:HGNC Symbol;Acc:HGNC:23697]	23187	Q86UU1	ENSG00000019144	protein_coding	3119.14	-0.0220297	0.0542045	-0.40642	0.684434	0.903036
MARCO	macrophage receptor with collagenous structure [Source:HGNC Symbol;Acc:HGNC:6895]	8685	Q9UEW3	ENSG00000019169	protein_coding	0.176059	0.00862596	0.0243034	0.354932	0.722641
CYP24A1	cytochrome P450 family 24 subfamily A member 1 [Source:HGNC Symbol;Acc:HGNC:2602]	1591	Q07973	ENSG00000019186	protein_coding	2390.34	-0.155089	0.0567252	-2.73395	0.00625797	0.0506214
PRDM11	PR/SET domain 11 [Source:HGNC Symbol;Acc:HGNC:13996]	56981	Q9NQV5	ENSG00000019485	protein_coding	515.758	0.0585906	0.087273	0.671382	0.501977	0.817773
SYT13	synaptotagmin 13 [Source:HGNC Symbol;Acc:HGNC:14962]	57586	Q7L8C5	ENSG00000019505	protein_coding	0
SNAI2	snail family transcriptional repressor 2 [Source:HGNC Symbol;Acc:HGNC:11094]	6591		ENSG00000019549	protein_coding	500.553	0.337399	0.0877014	3.84745	0.000119352	0.00196354
CD74	CD74 molecule [Source:HGNC Symbol;Acc:HGNC:1697]	972	P04233	ENSG00000019582	protein_coding	344.155	0.0581975	0.104558	0.556669	0.577754	0.857044
HGF	hepatocyte growth factor [Source:HGNC Symbol;Acc:HGNC:4893]	3082		ENSG00000019991	protein_coding	1.1086	-0.0247429	0.0538885	-0.466937	0.640545
ZRANB1	zinc finger RANBP2-type containing 1 [Source:HGNC Symbol;Acc:HGNC:18224]	54764	Q9UGI0	ENSG00000019995	protein_coding	784.761	0.0487682	0.0733163	0.665185	0.505932	0.819169
NCDN	neurochondrin [Source:HGNC Symbol;Acc:HGNC:17597]	23154	Q9UBB6	ENSG00000020129	protein_coding	589.801	0.020166	0.0830729	0.24276	0.808191	0.946749
ADGRA2	adhesion G protein-coupled receptor A2 [Source:HGNC Symbol;Acc:HGNC:17849]	25960		ENSG00000020181	protein_coding	670.334	0.0890463	0.0871938	1.02129	0.307116	0.665761
				ENSG00000020219		0.411943	-0.0221762	0.0315214	-0.633306	0.526534
ZFP64	ZFP64 zinc finger protein [Source:HGNC Symbol;Acc:HGNC:15940]	55734	Q9NTW7	ENSG00000020256	protein_coding	417.268	0.170252	0.0910323	1.87041	0.0614268	0.261609
MNAT1	MNAT1, CDK activating kinase assembly factor [Source:HGNC Symbol;Acc:HGNC:7181]	4331	P51948	ENSG00000020426	protein_coding	468.074	0.0124483	0.0972027	0.128064	0.898098	0.973688
SAMD4A	sterile alpha motif domain containing 4A [Source:HGNC Symbol;Acc:HGNC:23023]	23034	Q9UPU9	ENSG00000020577	protein_coding	464.788	-0.0430006	0.0886344	-0.48514	0.627577	0.88192
RUNX3	runt related transcription factor 3 [Source:HGNC Symbol;Acc:HGNC:10473]	864	Q13761	ENSG00000020633	protein_coding	91.5483	-0.188007	0.146075	-1.28613	0.198399	0.529981
MRE11	MRE11 homolog, double strand break repair nuclease [Source:HGNC Symbol;Acc:HGNC:7230]	4361	P49959	ENSG00000020922	protein_coding	1559.12	0.0278541	0.0576641	0.483045	0.629064	0.882352
PLEKHB1	pleckstrin homology domain containing B1 [Source:HGNC Symbol;Acc:HGNC:19079]	58473	Q9UF11	ENSG00000021300	protein_coding	8.18891	-0.0118322	0.120618	-0.0983449	0.921658	0.980651
SERPINB1	serpin family B member 1 [Source:HGNC Symbol;Acc:HGNC:3311]	1992	P30740	ENSG00000021355	protein_coding	1389.05	0.00601401	0.064583	0.0931201	0.925808	0.981906
CYP3A43	cytochrome P450 family 3 subfamily A member 43 [Source:HGNC Symbol;Acc:HGNC:17450]	64816	Q9HB55	ENSG00000021461	protein_coding	0.285343	-0.00939388	0.0254535	-0.362042	0.717321
SLC7A9	solute carrier family 7 member 9 [Source:HGNC Symbol;Acc:HGNC:11067]	11136	P82251	ENSG00000021488	protein_coding	2.4369	0.0312081	0.0717506	0.438593	0.660956
SPAST	spastin [Source:HGNC Symbol;Acc:HGNC:11233]	6683	Q9UBP0	ENSG00000021574	protein_coding	1395.09	-0.0369067	0.0658399	-0.560544	0.575108	0.855906
NRXN3	neurexin 3 [Source:HGNC Symbol;Acc:HGNC:8010]	9369		ENSG00000021645	protein_coding	230.019	0.0753678	0.122053	0.617623	0.536824	0.837997
OSBPL5	oxysterol binding protein like 5 [Source:HGNC Symbol;Acc:HGNC:16392]	114879		ENSG00000021762	protein_coding	230.466	0.119599	0.117235	1.02022	0.307626	0.666299
AQR	aquarius intron-binding spliceosomal factor [Source:HGNC Symbol;Acc:HGNC:29513]	9716	O60306	ENSG00000021776	protein_coding	2636.17	-0.00119219	0.0505991	-0.0235618	0.981202	0.995112
CPS1	carbamoyl-phosphate synthase 1 [Source:HGNC Symbol;Acc:HGNC:2323]	1373		ENSG00000021826	protein_coding	371.431	-0.293645	0.101448	-2.89313	0.00381425	0.0344127
C8B	complement C8 beta chain [Source:HGNC Symbol;Acc:HGNC:1353]	732	P07358	ENSG00000021852	protein_coding	0
FHL1	four and a half LIM domains 1 [Source:HGNC Symbol;Acc:HGNC:3702]	2273	Q13642	ENSG00000022267	protein_coding	122.914	0.421282	0.140122	3.00525	0.00265364	0.0260473
RTF2	replication termination factor 2 [Source:HGNC Symbol;Acc:HGNC:15890]	51507	Q9BY42	ENSG00000022277	protein_coding	2505.66	-0.0678356	0.0565643	-1.19924	0.230433	0.576034
GABRA1	gamma-aminobutyric acid type A receptor alpha1 subunit [Source:HGNC Symbol;Acc:HGNC:4075]	2554	P14867	ENSG00000022355	protein_coding	0
NLRP2	NLR family pyrin domain containing 2 [Source:HGNC Symbol;Acc:HGNC:22948]	55655		ENSG00000022556	protein_coding	0.631418	0.00605782	0.0388458	0.153701	0.877845
SLC45A4	solute carrier family 45 member 4 [Source:HGNC Symbol;Acc:HGNC:29196]	57210	Q5BKX6	ENSG00000022567	protein_coding	1022.55	0.260761	0.0777545	3.3537	0.000797381	0.00982483
RNF10	ring finger protein 10 [Source:HGNC Symbol;Acc:HGNC:10055]	9921		ENSG00000022840	protein_coding	2417.33	0.0962097	0.0539929	1.78193	0.0747613	0.297635
ZNF839	zinc finger protein 839 [Source:HGNC Symbol;Acc:HGNC:20345]	55778	A8K0R7	ENSG00000022976	protein_coding	122.635	-0.0829273	0.134513	-0.616345	0.537667	0.838023
ZDHHC6	zinc finger DHHC-type containing 6 [Source:HGNC Symbol;Acc:HGNC:19160]	64429		ENSG00000023041	protein_coding	852.744	-0.0751168	0.0701253	-1.07111	0.284118	0.64241
GRAMD1B	GRAM domain containing 1B [Source:HGNC Symbol;Acc:HGNC:29214]	57476		ENSG00000023171	protein_coding	0.445331	-0.00454065	0.0344014	-0.128851	0.897476
RNH1	ribonuclease/angiogenin inhibitor 1 [Source:HGNC Symbol;Acc:HGNC:10074]	6050	P13489	ENSG00000023191	protein_coding	3649.41	-0.174246	0.0501931	-3.4714	0.000517747	0.00685673
NDUFS1	NADH:ubiquinone oxidoreductase core subunit S1 [Source:HGNC Symbol;Acc:HGNC:7707]	4719	P28331	ENSG00000023228	protein_coding	3954.45	-0.0326016	0.0525402	-0.620503	0.534927	0.836676
RB1CC1	RB1 inducible coiled-coil 1 [Source:HGNC Symbol;Acc:HGNC:15574]	9821	Q8TDY2	ENSG00000023287	protein_coding	3438.84	-0.0234811	0.0485913	-0.483235	0.628929	0.882352
ERP44	endoplasmic reticulum protein 44 [Source:HGNC Symbol;Acc:HGNC:18311]	23071	Q9BS26	ENSG00000023318	protein_coding	735.763	0.168772	0.0743828	2.26911	0.0232619	0.135173
ALAS1	5'-aminolevulinate synthase 1 [Source:HGNC Symbol;Acc:HGNC:396]	211	P13196	ENSG00000023330	protein_coding	698.782	-0.0118699	0.0786056	-0.151004	0.879972	0.968005
BIRC3	baculoviral IAP repeat containing 3 [Source:HGNC Symbol;Acc:HGNC:591]	330	Q13489	ENSG00000023445	protein_coding	262.656	0.521577	0.119276	4.37136	1.23476e-05	0.000269081
AKAP11	A-kinase anchoring protein 11 [Source:HGNC Symbol;Acc:HGNC:369]	11215	Q9UKA4	ENSG00000023516	protein_coding	1332.13	-0.0166057	0.0615867	-0.269629	0.787446	0.939327
GLRX2	glutaredoxin 2 [Source:HGNC Symbol;Acc:HGNC:16065]	51022		ENSG00000023572	protein_coding	458.373	0.0123035	0.0905475	0.135886	0.891911	0.972073
SNAPC1	small nuclear RNA activating complex polypeptide 1 [Source:HGNC Symbol;Acc:HGNC:11134]	6617	Q16533	ENSG00000023608	protein_coding	267.611	-0.216487	0.10757	-2.0114	0.0442827	0.211238
DERA	deoxyribose-phosphate aldolase [Source:HGNC Symbol;Acc:HGNC:24269]	51071	Q9Y315	ENSG00000023697	protein_coding	3892.28	-0.0928207	0.0573391	-1.61879	0.105492	0.368413
STRAP	serine/threonine kinase receptor associated protein [Source:HGNC Symbol;Acc:HGNC:30796]	11171		ENSG00000023734	protein_coding	3301.18	0.0241491	0.0458395	0.52682	0.598319	0.867666
ABCC2	ATP binding cassette subfamily C member 2 [Source:HGNC Symbol;Acc:HGNC:53]	1244	Q92887	ENSG00000023839	protein_coding	47.8052	0.731489	0.157245	4.63164	3.62789e-06	9.13279e-05
DEF6	DEF6, guanine nucleotide exchange factor [Source:HGNC Symbol;Acc:HGNC:2760]	50619	Q9H4E7	ENSG00000023892	protein_coding	3.5343	0.0748286	0.0886829	0.84551	0.397826
PLEKHO1	pleckstrin homology domain containing O1 [Source:HGNC Symbol;Acc:HGNC:24310]	51177		ENSG00000023902	protein_coding	174.714	0.286437	0.12465	2.29857	0.0215293	0.12813
GCLM	glutamate-cysteine ligase modifier subunit [Source:HGNC Symbol;Acc:HGNC:4312]	2730	P48507	ENSG00000023909	protein_coding	541.183	0.0782804	0.0876512	0.893082	0.371813	0.72634
UBR2	ubiquitin protein ligase E3 component n-recognin 2 [Source:HGNC Symbol;Acc:HGNC:21289]	23304	Q8IWV8	ENSG00000024048	protein_coding	994.352	0.115836	0.0665504	1.74063	0.0817479	0.314194
EHD2	EH domain containing 2 [Source:HGNC Symbol;Acc:HGNC:3243]	30846	Q9NZN4	ENSG00000024422	protein_coding	574.524	0.184195	0.0829264	2.22146	0.0263196	0.147127
DEPDC1	DEP domain containing 1 [Source:HGNC Symbol;Acc:HGNC:22949]	55635	Q5TB30	ENSG00000024526	protein_coding	2561.61	-0.0163162	0.0522395	-0.312333	0.754788	0.928319
CCDC28A	coiled-coil domain containing 28A [Source:HGNC Symbol;Acc:HGNC:21098]	25901	Q8IWP9	ENSG00000024862	protein_coding	376.21	-0.283858	0.0971244	-2.92102	0.00348882	0.0319872
RRAGD	Ras related GTP binding D [Source:HGNC Symbol;Acc:HGNC:19903]	58528	Q9NQL2	ENSG00000025039	protein_coding	14.3927	-0.104	0.142545	-0.730183	0.465278	0.794943
HSF2	heat shock transcription factor 2 [Source:HGNC Symbol;Acc:HGNC:5225]	3298	Q03933	ENSG00000025156	protein_coding	384.939	-0.0703533	0.097137	-0.724169	0.468962	0.797186
PHF20	PHD finger protein 20 [Source:HGNC Symbol;Acc:HGNC:16098]	51230	Q9BVI0	ENSG00000025293	protein_coding	1070.45	-0.0736938	0.0667108	-1.10463	0.269318	0.623434
HSD17B6	hydroxysteroid 17-beta dehydrogenase 6 [Source:HGNC Symbol;Acc:HGNC:23316]	8630	O14756	ENSG00000025423	protein_coding	4.72532	-0.0452886	0.0980516	-0.466122	0.641128	0.88696
NR1H3	nuclear receptor subfamily 1 group H member 3 [Source:HGNC Symbol;Acc:HGNC:7966]	10062	Q13133	ENSG00000025434	protein_coding	527.869	-0.0137822	0.084828	-0.162468	0.870937	0.964399
TYMP	thymidine phosphorylase [Source:HGNC Symbol;Acc:HGNC:3148]	1890	P19971	ENSG00000025708	protein_coding	41.8115	0.219881	0.157929	1.39212	0.163886	0.47659
NCAPH2	non-SMC condensin II complex subunit H2 [Source:HGNC Symbol;Acc:HGNC:25071]	29781	Q6IBW4	ENSG00000025770	protein_coding	830.901	0.0133636	0.0721268	0.185277	0.853012	0.959878
TOMM34	translocase of outer mitochondrial membrane 34 [Source:HGNC Symbol;Acc:HGNC:15746]	10953	Q15785	ENSG00000025772	protein_coding	1025.85	-0.0770476	0.0659412	-1.16839	0.242651	0.591552
SEC63	SEC63 homolog, protein translocation regulator [Source:HGNC Symbol;Acc:HGNC:21082]	11231	Q9UGP8	ENSG00000025796	protein_coding	370.47	0.240333	0.0950583	2.52869	0.0114489	0.0793389
KPNA6	karyopherin subunit alpha 6 [Source:HGNC Symbol;Acc:HGNC:6399]	23633	O60684	ENSG00000025800	protein_coding	2636.03	0.132344	0.0521824	2.53622	0.0112056	0.0781581
VIM	vimentin [Source:HGNC Symbol;Acc:HGNC:12692]	7431	P08670	ENSG00000026025	protein_coding	20323.9	0.0824129	0.0358928	2.29609	0.0216708	0.128623
RTEL1-TNFRSF6B	RTEL1-TNFRSF6B readthrough (NMD candidate) [Source:HGNC Symbol;Acc:HGNC:44095]			ENSG00000026036	protein_coding	30.88	0.111042	0.157067	0.706962	0.47959	0.804462
FAS	Fas cell surface death receptor [Source:HGNC Symbol;Acc:HGNC:11920]	355		ENSG00000026103	protein_coding	471.436	0.244471	0.0896875	2.72597	0.00641129	0.0515049
RNASET2	ribonuclease T2 [Source:HGNC Symbol;Acc:HGNC:21686]	8635		ENSG00000026297	protein_coding	2716.25	-0.0117432	0.0515282	-0.227898	0.819725	0.949453
CD44	CD44 molecule (Indian blood group) [Source:HGNC Symbol;Acc:HGNC:1681]	960	P16070	ENSG00000026508	protein_coding	583.279	0.273697	0.0840775	3.25542	0.00113224	0.0131464
KCNG1	potassium voltage-gated channel modifier subfamily G member 1 [Source:HGNC Symbol;Acc:HGNC:6248]	3755	Q9UIX4	ENSG00000026559	protein_coding	0
AGPAT4	1-acylglycerol-3-phosphate O-acyltransferase 4 [Source:HGNC Symbol;Acc:HGNC:20885]	56895	Q9NRZ5	ENSG00000026652	protein_coding	1155.48	-0.0237229	0.0670285	-0.353918	0.7234	0.918421
SLAMF7	SLAM family member 7 [Source:HGNC Symbol;Acc:HGNC:21394]	57823	Q9NQ25	ENSG00000026751	protein_coding	0.341796	0.0042845	0.0295105	0.145188	0.884562
BTN3A1	butyrophilin subfamily 3 member A1 [Source:HGNC Symbol;Acc:HGNC:1138]	11119	O00481	ENSG00000026950	protein_coding	908.835	0.164813	0.0741356	2.22327	0.0261973	0.1466
MIPEP	mitochondrial intermediate peptidase [Source:HGNC Symbol;Acc:HGNC:7104]	4285	Q99797	ENSG00000027001	protein_coding	946.364	-0.115846	0.0727568	-1.59214	0.111353	0.380192
PRKCH	protein kinase C eta [Source:HGNC Symbol;Acc:HGNC:9403]	5583		ENSG00000027075	protein_coding	200.557	-0.149916	0.117658	-1.27362	0.202797	0.537145
INSRR	insulin receptor related receptor [Source:HGNC Symbol;Acc:HGNC:6093]	3645	P14616	ENSG00000027644	protein_coding	0.341796	0.0042845	0.0295105	0.145188	0.884562
IFNGR1	interferon gamma receptor 1 [Source:HGNC Symbol;Acc:HGNC:5439]	3459	P15260	ENSG00000027697	protein_coding	480.736	-0.158484	0.0870296	-1.8207	0.0686526	0.281235
B4GALT7	beta-1,4-galactosyltransferase 7 [Source:HGNC Symbol;Acc:HGNC:930]	11285	Q9UBV7	ENSG00000027847	protein_coding	640.125	-0.117429	0.0811056	-1.44768	0.147707	0.450787
SH2D2A	SH2 domain containing 2A [Source:HGNC Symbol;Acc:HGNC:10821]	9047	Q9NP31	ENSG00000027869	protein_coding	1.13	0.0033679	0.0539155	0.0622422	0.95037
VRK2	vaccinia related kinase 2 [Source:HGNC Symbol;Acc:HGNC:12719]	7444	Q86Y07	ENSG00000028116	protein_coding	730.679	0.237504	0.0794761	2.98851	0.0028034	0.0271882
TNFRSF1B	TNF receptor superfamily member 1B [Source:HGNC Symbol;Acc:HGNC:11917]	7133	P20333	ENSG00000028137	protein_coding	0.797155	-0.00140076	0.0448333	-0.031159	0.975143
VEZT	vezatin, adherens junctions transmembrane protein [Source:HGNC Symbol;Acc:HGNC:18258]	55591	Q9HBM0	ENSG00000028203	protein_coding	1960.48	0.121641	0.0548058	2.21955	0.0264491	0.147725
POU2F2	POU class 2 homeobox 2 [Source:HGNC Symbol;Acc:HGNC:9213]	5452	P09086	ENSG00000028277	protein_coding	11.1368	0.214094	0.131246	1.63652	0.101731	0.359434
BRD9	bromodomain containing 9 [Source:HGNC Symbol;Acc:HGNC:25818]	65980		ENSG00000028310	protein_coding	1063.56	-0.0527155	0.0653074	-0.807178	0.419564	0.765508
SNX1	sorting nexin 1 [Source:HGNC Symbol;Acc:HGNC:11172]	6642		ENSG00000028528	protein_coding	673.321	-0.0686434	0.0868259	-0.790551	0.429206	0.772245
TBPL1	TATA-box binding protein like 1 [Source:HGNC Symbol;Acc:HGNC:11589]	9519		ENSG00000028839	protein_coding	279.423	0.303216	0.11032	2.74913	0.00597533	0.048728
ARNTL2	aryl hydrocarbon receptor nuclear translocator like 2 [Source:HGNC Symbol;Acc:HGNC:18984]	56938	Q8WYA1	ENSG00000029153	protein_coding	725.777	0.195745	0.0795332	2.46125	0.0138455	0.0915769
BCLAF1	BCL2 associated transcription factor 1 [Source:HGNC Symbol;Acc:HGNC:16863]	9774		ENSG00000029363	protein_coding	2675.8	0.0786295	0.0508736	1.5456	0.122202	0.402839
SLC39A9	solute carrier family 39 member 9 [Source:HGNC Symbol;Acc:HGNC:20182]	55334	Q9NUM3	ENSG00000029364	protein_coding	1745.84	-0.0686174	0.0572303	-1.19895	0.230547	0.576237
ANK1	ankyrin 1 [Source:HGNC Symbol;Acc:HGNC:492]	286	P16157	ENSG00000029534	protein_coding	1.80739	-0.0117485	0.0649697	-0.182584	0.855125
IBSP	integrin binding sialoprotein [Source:HGNC Symbol;Acc:HGNC:5341]	3381	P21815	ENSG00000029559	protein_coding	0.505603	-0.00590695	0.0335553	-0.172523	0.863026
TFB1M	transcription factor B1, mitochondrial [Source:HGNC Symbol;Acc:HGNC:17037]	51106	Q8WVM0	ENSG00000029639	protein_coding	137.933	-0.0804002	0.133471	-0.60237	0.546928	0.842497
RABEP1	rabaptin, RAB GTPase binding effector protein 1 [Source:HGNC Symbol;Acc:HGNC:17677]	9135		ENSG00000029725	protein_coding	1294.33	0.026474	0.0645945	0.409845	0.68192	0.902012
HMGB3	high mobility group box 3 [Source:HGNC Symbol;Acc:HGNC:5004]	3149		ENSG00000029993	protein_coding	2365.16	0.194139	0.0502772	3.86147	0.000112708	0.00187181
NUP160	nucleoporin 160 [Source:HGNC Symbol;Acc:HGNC:18017]	23279	Q12769	ENSG00000030066	protein_coding	995.477	0.216395	0.0701811	3.08353	0.00204564	0.0211455
BAK1	BCL2 antagonist/killer 1 [Source:HGNC Symbol;Acc:HGNC:949]	578	Q16611	ENSG00000030110	protein_coding	264.839	-0.0902941	0.108298	-0.833605	0.404504	0.753119
MUSK	muscle associated receptor tyrosine kinase [Source:HGNC Symbol;Acc:HGNC:7525]	4593	O15146	ENSG00000030304	protein_coding	0.715734	0.00821221	0.0382181	0.218102	0.82735
IKZF2	IKAROS family zinc finger 2 [Source:HGNC Symbol;Acc:HGNC:13177]	22807		ENSG00000030419	protein_coding	151.767	-0.28384	0.128615	-2.20423	0.0275081	0.151801
GRN	granulin precursor [Source:HGNC Symbol;Acc:HGNC:4601]	2896	P28799	ENSG00000030582	protein_coding	3983.23	-0.221485	0.055623	-3.98177	6.84029e-05	0.00121304
FAM13B	family with sequence similarity 13 member B [Source:HGNC Symbol;Acc:HGNC:1335]	51306	Q9NYF5	ENSG00000031003	protein_coding	1253.31	-0.0064199	0.0634324	-0.10121	0.919384	0.979785
ARHGAP31	Rho GTPase activating protein 31 [Source:HGNC Symbol;Acc:HGNC:29216]	57514	Q2M1Z3	ENSG00000031081	protein_coding	403.458	-0.376662	0.100613	-3.74133	0.000183049	0.00285084
CENPQ	centromere protein Q [Source:HGNC Symbol;Acc:HGNC:21347]	55166	Q7L2Z9	ENSG00000031691	protein_coding	258.864	0.107733	0.112084	0.961204	0.33645	0.693763
SARS	seryl-tRNA synthetase [Source:HGNC Symbol;Acc:HGNC:10537]	6301	P49591	ENSG00000031698	protein_coding	2887.33	0.0260198	0.0592004	0.43952	0.660285	0.894523
RANBP3	RAN binding protein 3 [Source:HGNC Symbol;Acc:HGNC:9850]	8498	Q9H6Z4	ENSG00000031823	protein_coding	1362.44	0.0132	0.0642156	0.205563	0.837133	0.954599
ARID4A	AT-rich interaction domain 4A [Source:HGNC Symbol;Acc:HGNC:9885]	5926	P29374	ENSG00000032219	protein_coding	371.408	0.021993	0.0955019	0.230282	0.817872	0.948798
EIPR1	EARP complex and GARP complex interacting protein 1 [Source:HGNC Symbol;Acc:HGNC:12383]	7260		ENSG00000032389	protein_coding	637.843	0.148871	0.0882569	1.68689	0.0916253	0.336706
PNPLA6	patatin like phospholipase domain containing 6 [Source:HGNC Symbol;Acc:HGNC:16268]	10908	Q8IY17	ENSG00000032444	protein_coding	1594.9	-0.0330715	0.0581604	-0.568618	0.569615	0.855144
IFT88	intraflagellar transport 88 [Source:HGNC Symbol;Acc:HGNC:20606]	8100	Q13099	ENSG00000032742	protein_coding	501.252	-0.152425	0.0870856	-1.75001	0.0801171	0.311055
ALG1	ALG1, chitobiosyldiphosphodolichol beta-mannosyltransferase [Source:HGNC Symbol;Acc:HGNC:18294]	56052	Q9BT22	ENSG00000033011	protein_coding	425.569	-0.064683	0.089906	-0.719371	0.471913	0.799103
ZCCHC8	zinc finger CCHC-type containing 8 [Source:HGNC Symbol;Acc:HGNC:25265]	55596	Q6NZY4	ENSG00000033030	protein_coding	948.447	0.209213	0.0700624	2.9863	0.00282379	0.0273497
ABCF2	ATP binding cassette subfamily F member 2 [Source:HGNC Symbol;Acc:HGNC:71]	10061	Q9UG63	ENSG00000033050	protein_coding	2715.01	0.0681187	0.051801	1.31502	0.188503	0.515815
CHPF2	chondroitin polymerizing factor 2 [Source:HGNC Symbol;Acc:HGNC:29270]	54480		ENSG00000033100	protein_coding	3416.56	-0.149947	0.0478563	-3.13321	0.00172903	0.0184571
LRRC7	leucine rich repeat containing 7 [Source:HGNC Symbol;Acc:HGNC:18531]	57554		ENSG00000033122	protein_coding	22.0868	0.132095	0.150756	0.874166	0.382028	0.734501
FUT8	fucosyltransferase 8 [Source:HGNC Symbol;Acc:HGNC:4019]	2530	Q9BYC5	ENSG00000033170	protein_coding	569.336	0.111955	0.0814893	1.37395	0.169456	0.486489
UBA6	ubiquitin like modifier activating enzyme 6 [Source:HGNC Symbol;Acc:HGNC:25581]	55236	A0AVT1	ENSG00000033178	protein_coding	3181.5	0.180355	0.0502014	3.59269	0.000327287	0.00465833
GAB2	GRB2 associated binding protein 2 [Source:HGNC Symbol;Acc:HGNC:14458]	9846	Q9UQC2	ENSG00000033327	protein_coding	650.969	-0.186952	0.083578	-2.23655	0.0253161	0.143137
ATP6V0A1	ATPase H+ transporting V0 subunit a1 [Source:HGNC Symbol;Acc:HGNC:865]	535	Q93050	ENSG00000033627	protein_coding	363.351	0.0327807	0.102014	0.321379	0.747923	0.927192
PIAS1	protein inhibitor of activated STAT 1 [Source:HGNC Symbol;Acc:HGNC:2752]	8554	O75925	ENSG00000033800	protein_coding	384.804	0.180518	0.0957967	1.88465	0.0594765	0.256055
SLC4A7	solute carrier family 4 member 7 [Source:HGNC Symbol;Acc:HGNC:11033]	9497		ENSG00000033867	protein_coding	2872.08	0.151121	0.0487326	3.1011	0.00192802	0.0201556
APBA2	amyloid beta precursor protein binding family A member 2 [Source:HGNC Symbol;Acc:HGNC:579]	321	Q99767	ENSG00000034053	protein_coding	12.4877	0.356496	0.135471	2.65339	0.00796874	0.0609446
MAP2K3	mitogen-activated protein kinase kinase 3 [Source:HGNC Symbol;Acc:HGNC:6843]	5606		ENSG00000034152	protein_coding	76.4319	0.102998	0.151434	0.680192	0.496383	0.814872
EFCAB1	EF-hand calcium binding domain 1 [Source:HGNC Symbol;Acc:HGNC:25678]	79645		ENSG00000034239	protein_coding	0.152699	-0.00283079	0.0243034	-0.116473	0.907278
TMSB10	thymosin beta 10 [Source:HGNC Symbol;Acc:HGNC:11879]	9168	P63313	ENSG00000034510	protein_coding	47147.4	-0.275231	0.0604387	-4.55387	5.26676e-06	0.000126236
ASTE1	asteroid homolog 1 [Source:HGNC Symbol;Acc:HGNC:25021]	28990		ENSG00000034533	protein_coding	193.981	-0.0167663	0.121444	-0.138075	0.890181	0.971518
RNF19A	ring finger protein 19A, RBR E3 ubiquitin protein ligase [Source:HGNC Symbol;Acc:HGNC:13432]	25897	Q9NV58	ENSG00000034677	protein_coding	1482.26	0.00137209	0.0632288	0.0217003	0.982687	0.995333
PEX3	peroxisomal biogenesis factor 3 [Source:HGNC Symbol;Acc:HGNC:8858]	8504		ENSG00000034693	protein_coding	473.367	-0.00750478	0.0921447	-0.0814472	0.935086	0.983648
GABARAPL2	GABA type A receptor associated protein like 2 [Source:HGNC Symbol;Acc:HGNC:13291]	11345	P60520	ENSG00000034713	protein_coding	932.868	-0.117095	0.0686607	-1.7053	0.0881378	0.328646
MYOC	myocilin [Source:HGNC Symbol;Acc:HGNC:7610]	4653		ENSG00000034971	protein_coding	8.12639	-0.053992	0.117638	-0.458397	0.646667	0.888578
SH3YL1	SH3 and SYLF domain containing 1 [Source:HGNC Symbol;Acc:HGNC:29546]	26751	Q96HL8	ENSG00000035115	protein_coding	246.183	-0.287546	0.113741	-2.52602	0.0115362	0.0796399
FAM136A	family with sequence similarity 136 member A [Source:HGNC Symbol;Acc:HGNC:25911]	84908	Q96C01	ENSG00000035141	protein_coding	1193.84	-0.00580592	0.0662192	-0.0876772	0.930133	0.982444
VCL	vinculin [Source:HGNC Symbol;Acc:HGNC:12665]	7414		ENSG00000035403	protein_coding	10760.7	-0.0703741	0.0371754	-1.89302	0.0583552	0.25233
DEPDC1B	DEP domain containing 1B [Source:HGNC Symbol;Acc:HGNC:24902]	55789	Q8WUY9	ENSG00000035499	protein_coding	535.598	0.397209	0.0848297	4.68271	2.83103e-06	7.316e-05
DAPK2	death associated protein kinase 2 [Source:HGNC Symbol;Acc:HGNC:2675]	23604		ENSG00000035664	protein_coding	5.2568	0.00976315	0.10322	0.0945348	0.924684	0.981573
NSMAF	neutral sphingomyelinase activation associated factor [Source:HGNC Symbol;Acc:HGNC:8017]	8439	Q92636	ENSG00000035681	protein_coding	870.941	0.0620468	0.0701318	0.884746	0.376294	0.729509
ADSS	adenylosuccinate synthase [Source:HGNC Symbol;Acc:HGNC:292]	159	P30520	ENSG00000035687	protein_coding	1483.84	0.178131	0.0631188	2.8222	0.00476956	0.0410046
STAP1	signal transducing adaptor family member 1 [Source:HGNC Symbol;Acc:HGNC:24133]	26228	Q9ULZ2	ENSG00000035720	protein_coding	1.03684	0.0642584	0.0450906	1.66575	0.0957637
TIMP2	TIMP metallopeptidase inhibitor 2 [Source:HGNC Symbol;Acc:HGNC:11821]	7077		ENSG00000035862	protein_coding	1537.68	0.0337161	0.0772445	0.436495	0.662477	0.895489
RFC1	replication factor C subunit 1 [Source:HGNC Symbol;Acc:HGNC:9969]	5981	P35251	ENSG00000035928	protein_coding	2584.18	0.0837556	0.0561917	1.49054	0.136083	0.429451
TBC1D23	TBC1 domain family member 23 [Source:HGNC Symbol;Acc:HGNC:25622]	55773		ENSG00000036054	protein_coding	1556.63	0.0312659	0.0585115	0.534359	0.593093	0.865439
CUL3	cullin 3 [Source:HGNC Symbol;Acc:HGNC:2553]	8452	Q13618	ENSG00000036257	protein_coding	1311.06	0.046922	0.0617014	0.760482	0.446967	0.783963
MYOM2	myomesin 2 [Source:HGNC Symbol;Acc:HGNC:7614]	9172	P54296	ENSG00000036448	protein_coding	1853.48	0.142268	0.0617837	2.30275	0.0212929	0.127184
OTC	ornithine carbamoyltransferase [Source:HGNC Symbol;Acc:HGNC:8512]	5009	P00480	ENSG00000036473	protein_coding	0
CYP46A1	cytochrome P450 family 46 subfamily A member 1 [Source:HGNC Symbol;Acc:HGNC:2641]	10858		ENSG00000036530	protein_coding	0.279299	-0.0109385	0.0274517	-0.383493	0.701354
AC118549.1	ZZ-type zinc finger-containing protein 3 [Source:UniProtKB/Swiss-Prot;Acc:Q8IYH5]	26009	Q8IYH5	ENSG00000036549	protein_coding	1316.03	-0.0191797	0.0637084	-0.30105	0.763376	0.931421
SLC18A1	solute carrier family 18 member A1 [Source:HGNC Symbol;Acc:HGNC:10934]	6570	P54219	ENSG00000036565	protein_coding	0.142671	-0.00283079	0.0243034	-0.116473	0.907278
USP2	ubiquitin specific peptidase 2 [Source:HGNC Symbol;Acc:HGNC:12618]	9099	O75604	ENSG00000036672	protein_coding	0.813226	-0.00240807	0.0470143	-0.0512908	0.959094
CASR	calcium sensing receptor [Source:HGNC Symbol;Acc:HGNC:1514]	846	P41180	ENSG00000036828	protein_coding	0.430392	0.0212819	0.0295496	0.746417	0.455416
TUBG2	tubulin gamma 2 [Source:HGNC Symbol;Acc:HGNC:12419]	27175	Q9NRH3	ENSG00000037042	protein_coding	83.4819	-0.137249	0.148591	-0.923251	0.355876	0.712293
RPL26L1	ribosomal protein L26 like 1 [Source:HGNC Symbol;Acc:HGNC:17050]	51121	Q9UNX3	ENSG00000037241	protein_coding	363.888	-0.025738	0.102591	-0.2509	0.801892	0.944673
FLT4	fms related tyrosine kinase 4 [Source:HGNC Symbol;Acc:HGNC:3767]	2324	P35916	ENSG00000037280	protein_coding	184.006	1.02232	0.130177	7.82606	5.03408e-15	5.88014e-13
NSUN2	NOP2/Sun RNA methyltransferase family member 2 [Source:HGNC Symbol;Acc:HGNC:25994]	54888	Q08J23	ENSG00000037474	protein_coding	2719.86	0.13322	0.0509861	2.61292	0.00897736	0.0665647
FBXO42	F-box protein 42 [Source:HGNC Symbol;Acc:HGNC:29249]	54455	Q6P3S6	ENSG00000037637	protein_coding	870.922	0.263455	0.0724277	3.63782	0.000274953	0.00401455
MFAP3	microfibril associated protein 3 [Source:HGNC Symbol;Acc:HGNC:7034]	4238		ENSG00000037749	protein_coding	1218.44	0.0565291	0.0645743	0.875433	0.381338	0.733968
MRI1	methylthioribose-1-phosphate isomerase 1 [Source:HGNC Symbol;Acc:HGNC:28469]	84245	Q9BV20	ENSG00000037757	protein_coding	2416.86	0.281047	0.0559475	5.02346	5.07488e-07	1.54638e-05
METTL1	methyltransferase like 1 [Source:HGNC Symbol;Acc:HGNC:7030]	4234	Q9UBP6	ENSG00000037897	protein_coding	247.322	0.11578	0.109285	1.05954	0.289353	0.648472
HOXC8	homeobox C8 [Source:HGNC Symbol;Acc:HGNC:5129]	3224	P31273	ENSG00000037965	protein_coding	0.142671	-0.00283079	0.0243034	-0.116473	0.907278
AGA	aspartylglucosaminidase [Source:HGNC Symbol;Acc:HGNC:318]	175	P20933	ENSG00000038002	protein_coding	600.948	0.000414546	0.0826593	0.0050146	0.995999	0.999193
PI4K2B	phosphatidylinositol 4-kinase type 2 beta [Source:HGNC Symbol;Acc:HGNC:18215]	55300	Q8TCG2	ENSG00000038210	protein_coding	455.723	0.292087	0.0904549	3.22928	0.00124102	0.0141194
BOD1L1	biorientation of chromosomes in cell division 1 like 1 [Source:HGNC Symbol;Acc:HGNC:31792]	259282	Q8NFC6	ENSG00000038219	protein_coding	1671.25	-0.0703722	0.0683162	-1.03006	0.302982	0.661006
MAT2B	methionine adenosyltransferase 2B [Source:HGNC Symbol;Acc:HGNC:6905]	27430	Q9NZL9	ENSG00000038274	protein_coding	1887.3	0.00111235	0.0535433	0.0207746	0.983425	0.995333
TLL1	tolloid like 1 [Source:HGNC Symbol;Acc:HGNC:11843]	7092	O43897	ENSG00000038295	protein_coding	334.639	-0.337733	0.102007	-3.30838	0.000938377	0.0112227
EDC4	enhancer of mRNA decapping 4 [Source:HGNC Symbol;Acc:HGNC:17157]	23644	Q6P2E9	ENSG00000038358	protein_coding	1398.98	0.019618	0.0625446	0.313661	0.753778	0.928319
TRIO	trio Rho guanine nucleotide exchange factor [Source:HGNC Symbol;Acc:HGNC:12303]	7204	O75962	ENSG00000038382	protein_coding	6308.78	0.024012	0.0471347	0.509436	0.610447	0.873702
VCAN	versican [Source:HGNC Symbol;Acc:HGNC:2464]	1462	P13611	ENSG00000038427	protein_coding	29957.8	-0.287118	0.05174	-5.54922	2.86944e-08	1.10253e-06
CLEC16A	C-type lectin domain containing 16A [Source:HGNC Symbol;Acc:HGNC:29013]	23274	Q2KHT3	ENSG00000038532	protein_coding	331.037	-0.0325629	0.100811	-0.322974	0.746715	0.927029
MSR1	macrophage scavenger receptor 1 [Source:HGNC Symbol;Acc:HGNC:7376]	4481	P21757	ENSG00000038945	protein_coding	518.072	-0.0838898	0.0843808	-0.994083	0.320183	0.679167
CDH1	cadherin 1 [Source:HGNC Symbol;Acc:HGNC:1748]	999	P12830	ENSG00000039068	protein_coding	9.87833	0.0470281	0.127395	0.369949	0.711421	0.913711
MTREX	Mtr4 exosome RNA helicase [Source:HGNC Symbol;Acc:HGNC:18734]	23517	P42285	ENSG00000039123	protein_coding	1270.69	0.0449678	0.061614	0.729836	0.465491	0.795151
DNAH5	dynein axonemal heavy chain 5 [Source:HGNC Symbol;Acc:HGNC:2950]	1767	Q8TE73	ENSG00000039139	protein_coding	104.399	0.0422482	0.141404	0.298765	0.765119	0.932049
ZFYVE16	zinc finger FYVE-type containing 16 [Source:HGNC Symbol;Acc:HGNC:20756]	9765	Q7Z3T8	ENSG00000039319	protein_coding	1149.45	0.0334766	0.0636965	0.525575	0.599184	0.867797
RIPOR1	RHO family interacting cell polarization regulator 1 [Source:HGNC Symbol;Acc:HGNC:25836]	79567		ENSG00000039523	protein_coding	183.2	-0.181402	0.120616	-1.50326	0.132773	0.423427
C6	complement C6 [Source:HGNC Symbol;Acc:HGNC:1339]	729	P13671	ENSG00000039537	protein_coding	0.400409	0.0203054	0.0288697	0.701584	0.482938
RAI14	retinoic acid induced 14 [Source:HGNC Symbol;Acc:HGNC:14873]	26064	Q9P0K7	ENSG00000039560	protein_coding	2418.75	-0.0447951	0.0522528	-0.85727	0.391296	0.742462
SOX30	SRY-box 30 [Source:HGNC Symbol;Acc:HGNC:30635]	11063	O94993	ENSG00000039600	protein_coding	0.455359	-0.00505729	0.0346217	-0.142877	0.886388
PNKP	polynucleotide kinase 3'-phosphatase [Source:HGNC Symbol;Acc:HGNC:9154]	11284		ENSG00000039650	protein_coding	532.074	-0.15752	0.0854988	-1.84197	0.0654795	0.272242
BEST2	bestrophin 2 [Source:HGNC Symbol;Acc:HGNC:17107]	54831	Q8NFU1	ENSG00000039987	protein_coding	0.933256	0.0514415	0.0479083	1.14239	0.253294
PHLPP2	PH domain and leucine rich repeat protein phosphatase 2 [Source:HGNC Symbol;Acc:HGNC:29149]	23035		ENSG00000040199	protein_coding	1420.14	-0.126287	0.073505	-1.71804	0.0857896	0.323122
SPDL1	spindle apparatus coiled-coil protein 1 [Source:HGNC Symbol;Acc:HGNC:26010]	54908	Q96EA4	ENSG00000040275	protein_coding	1650.92	0.205803	0.0593529	3.46756	0.000525211	0.00693769
STAU2	staufen double-stranded RNA binding protein 2 [Source:HGNC Symbol;Acc:HGNC:11371]	27067		ENSG00000040341	protein_coding	1741.85	0.0139172	0.0573793	0.242549	0.808355	0.946749
PQLC2	PQ loop repeat containing 2 [Source:HGNC Symbol;Acc:HGNC:26001]	54896	Q6ZP29	ENSG00000040487	protein_coding	402.619	-0.484322	0.0994006	-4.86741	1.13073e-06	3.16984e-05
CTNS	cystinosin, lysosomal cystine transporter [Source:HGNC Symbol;Acc:HGNC:2518]	1497	O60931	ENSG00000040531	protein_coding	297.966	-0.230847	0.104144	-2.21559	0.0267197	0.148715
RTN4R	reticulon 4 receptor [Source:HGNC Symbol;Acc:HGNC:18601]	65078		ENSG00000040608	protein_coding	14.4037	0.176979	0.141455	1.25296	0.210219	0.547613
PHF23	PHD finger protein 23 [Source:HGNC Symbol;Acc:HGNC:28428]	79142	Q9BUL5	ENSG00000040633	protein_coding	857.744	-0.134361	0.0774725	-1.73412	0.0828959	0.317053
CDH10	cadherin 10 [Source:HGNC Symbol;Acc:HGNC:1749]	1008	Q9Y6N8	ENSG00000040731	protein_coding	25.3263	0.358081	0.152619	2.35418	0.0185638	0.114648
INPP4A	inositol polyphosphate-4-phosphatase type I A [Source:HGNC Symbol;Acc:HGNC:6074]	3631	Q96PE3	ENSG00000040933	protein_coding	1027.59	0.081343	0.0686101	1.1856	0.235781	0.584068
RAB27B	RAB27B, member RAS oncogene family [Source:HGNC Symbol;Acc:HGNC:9767]	5874		ENSG00000041353	protein_coding	643.614	-0.131434	0.0803855	-1.63487	0.102076	0.360178
PSMA4	proteasome subunit alpha 4 [Source:HGNC Symbol;Acc:HGNC:9533]	5685		ENSG00000041357	protein_coding	3913.89	0.149743	0.0522108	2.86806	0.00412999	0.0367318
MYO16	myosin XVI [Source:HGNC Symbol;Acc:HGNC:29822]	23026	Q9Y6X6	ENSG00000041515	protein_coding	13.473	0.20007	0.140139	1.43003	0.15271	0.458941
LSG1	large 60S subunit nuclear export GTPase 1 [Source:HGNC Symbol;Acc:HGNC:25652]	55341	Q9H089	ENSG00000041802	protein_coding	1403.04	0.122071	0.0631267	1.93379	0.0531393	0.236729
PARP3	poly(ADP-ribose) polymerase family member 3 [Source:HGNC Symbol;Acc:HGNC:273]	10039	Q9Y6F1	ENSG00000041880	protein_coding	454.906	-0.0804206	0.0903881	-0.889608	0.373676	0.727869
TNC	tenascin C [Source:HGNC Symbol;Acc:HGNC:5318]	3371	P24821	ENSG00000041982	protein_coding	13.1589	0.192426	0.136753	1.41425	0.157289	0.46575
THAP3	THAP domain containing 3 [Source:HGNC Symbol;Acc:HGNC:20855]	90326	Q8WTV1	ENSG00000041988	protein_coding	346.94	-0.00212047	0.098257	-0.0215805	0.982783	0.995333
RIPOR3	RIPOR family member 3 [Source:HGNC Symbol;Acc:HGNC:16168]	140876	Q96MK2	ENSG00000042062	protein_coding	68.4179	0.0327774	0.151738	0.215915	0.829054	0.952325
TDP1	tyrosyl-DNA phosphodiesterase 1 [Source:HGNC Symbol;Acc:HGNC:18884]	55775		ENSG00000042088	protein_coding	636.394	-0.105693	0.079869	-1.32317	0.185778	0.511472
AIFM2	apoptosis inducing factor, mitochondria associated 2 [Source:HGNC Symbol;Acc:HGNC:21411]	84883	Q9BRQ8	ENSG00000042286	protein_coding	778.259	-0.0422206	0.0735378	-0.574114	0.565891	0.853197
C2orf83	chromosome 2 open reading frame 83 [Source:HGNC Symbol;Acc:HGNC:25344]	56918	Q53S99	ENSG00000042304	protein_coding	1.51168	0.092829	0.05998	1.75801	0.078745
SPATA7	spermatogenesis associated 7 [Source:HGNC Symbol;Acc:HGNC:20423]	55812	Q9P0W8	ENSG00000042317	protein_coding	143.216	-0.200005	0.131114	-1.52461	0.127355	0.412283
MED17	mediator complex subunit 17 [Source:HGNC Symbol;Acc:HGNC:2375]	9440	Q9NVC6	ENSG00000042429	protein_coding	309.114	-0.170434	0.109042	-1.56274	0.118115	0.394338
RETSAT	retinol saturase [Source:HGNC Symbol;Acc:HGNC:25991]	54884		ENSG00000042445	protein_coding	1025.09	-0.154988	0.0717557	-2.15972	0.030794	0.165697
CAPG	capping actin protein, gelsolin like [Source:HGNC Symbol;Acc:HGNC:1474]	822	P40121	ENSG00000042493	protein_coding	1563.78	-0.0936492	0.0740212	-1.26511	0.20583	0.541657
AP2S1	adaptor related protein complex 2 sigma 1 subunit [Source:HGNC Symbol;Acc:HGNC:565]	1175		ENSG00000042753	protein_coding	2651.24	-0.0261959	0.053498	-0.489658	0.624376	0.879963
USH2A	usherin [Source:HGNC Symbol;Acc:HGNC:12601]	7399	O75445	ENSG00000042781	protein_coding	11.6723	-0.0378279	0.134143	-0.282281	0.777728	0.936168
ZPBP	zona pellucida binding protein [Source:HGNC Symbol;Acc:HGNC:15662]	11055	Q9BS86	ENSG00000042813	protein_coding	0.29537	-0.0113483	0.0279572	-0.411234	0.680901
TG	thyroglobulin [Source:HGNC Symbol;Acc:HGNC:11764]	7038		ENSG00000042832	protein_coding	2.34531	-0.0012351	0.0678915	-0.0180839	0.985572
ADAM28	ADAM metallopeptidase domain 28 [Source:HGNC Symbol;Acc:HGNC:206]	10863	Q9UKQ2	ENSG00000042980	protein_coding	24.2514	-0.00737803	0.154245	-0.047877	0.961814	0.990027
BARX2	BARX homeobox 2 [Source:HGNC Symbol;Acc:HGNC:956]	8538	Q9UMQ3	ENSG00000043039	protein_coding	0.693915	0.0315161	0.0404204	0.790939	0.42898
DCUN1D1	defective in cullin neddylation 1 domain containing 1 [Source:HGNC Symbol;Acc:HGNC:18184]	54165	Q96GG9	ENSG00000043093	protein_coding	1798.51	-0.00796669	0.0557843	-0.142812	0.886438	0.970099
JADE2	jade family PHD finger 2 [Source:HGNC Symbol;Acc:HGNC:22984]	23338		ENSG00000043143	protein_coding	1300.77	-0.196985	0.0616184	-3.19654	0.00139085	0.0155316
ZIC2	Zic family member 2 [Source:HGNC Symbol;Acc:HGNC:12873]	7546	O95409	ENSG00000043355	protein_coding	166.656	0.50374	0.125863	4.00064	6.31715e-05	0.00113331
LCP2	lymphocyte cytosolic protein 2 [Source:HGNC Symbol;Acc:HGNC:6529]	3937	Q13094	ENSG00000043462	protein_coding	0.215196	0.00862596	0.0243034	0.354932	0.722641
TRIT1	tRNA isopentenyltransferase 1 [Source:HGNC Symbol;Acc:HGNC:20286]	54802	Q9H3H1	ENSG00000043514	protein_coding	816.12	-0.0576885	0.0754426	-0.764611	0.444503	0.782964
ADRB1	adrenoceptor beta 1 [Source:HGNC Symbol;Acc:HGNC:285]	153	P08588	ENSG00000043591	protein_coding	45.413	0.145562	0.157301	0.925396	0.35476	0.711309
GUCA2B	guanylate cyclase activator 2B [Source:HGNC Symbol;Acc:HGNC:4683]	2981	Q16661	ENSG00000044012	protein_coding	1.50165	0.0932625	0.059826	1.75546	0.0791807
CUL7	cullin 7 [Source:HGNC Symbol;Acc:HGNC:21024]	9820	Q14999	ENSG00000044090	protein_coding	998.731	-0.178735	0.0683162	-2.61596	0.00889765	0.0661697
CTNNA1	catenin alpha 1 [Source:HGNC Symbol;Acc:HGNC:2509]	1495		ENSG00000044115	protein_coding	20847.8	-0.0978842	0.0387482	-2.52616	0.0115317	0.0796399
PHKA2	phosphorylase kinase regulatory subunit alpha 2 [Source:HGNC Symbol;Acc:HGNC:8926]	5256	P46019	ENSG00000044446	protein_coding	752.858	-0.146638	0.0754318	-1.94377	0.0519233	0.23348
CNTLN	centlein [Source:HGNC Symbol;Acc:HGNC:23432]	54875	Q9NXG0	ENSG00000044459	protein_coding	620.305	0.0813668	0.0793038	1.02607	0.304857	0.663364
EPHA3	EPH receptor A3 [Source:HGNC Symbol;Acc:HGNC:3387]	2042	P29320	ENSG00000044524	protein_coding	58.6139	-0.305396	0.155682	-1.95705	0.0503416	0.229042
HSPA5	heat shock protein family A (Hsp70) member 5 [Source:HGNC Symbol;Acc:HGNC:5238]	3309	P11021	ENSG00000044574	protein_coding	4760.76	0.0943978	0.129688	0.727881	0.466686	0.795874
DSG2	desmoglein 2 [Source:HGNC Symbol;Acc:HGNC:3049]	1829	Q14126	ENSG00000046604	protein_coding	2763.87	0.0940584	0.0536967	1.75167	0.0798304	0.310617
GEMIN8	gem nuclear organelle associated protein 8 [Source:HGNC Symbol;Acc:HGNC:26044]	54960	Q9NWZ8	ENSG00000046647	protein_coding	385.51	-0.305136	0.095446	-3.19514	0.00139765	0.0155976
OFD1	OFD1, centriole and centriolar satellite protein [Source:HGNC Symbol;Acc:HGNC:2567]	8481	O75665	ENSG00000046651	protein_coding	728.081	-0.0772966	0.0745941	-1.03617	0.300123	0.658458
GPM6B	glycoprotein M6B [Source:HGNC Symbol;Acc:HGNC:4461]	2824	Q13491	ENSG00000046653	protein_coding	22.4101	0.0192668	0.153069	0.125892	0.899817	0.974033
MAGEC2	MAGE family member C2 [Source:HGNC Symbol;Acc:HGNC:13574]	51438	Q9UBF1	ENSG00000046774	protein_coding	0
PREX2	phosphatidylinositol-3,4,5-trisphosphate dependent Rac exchange factor 2 [Source:HGNC Symbol;Acc:HGNC:22950]	80243	Q70Z35	ENSG00000046889	protein_coding	6203.28	-0.074532	0.0513889	-1.45035	0.14696	0.449531
WDR37	WD repeat domain 37 [Source:HGNC Symbol;Acc:HGNC:31406]	22884	Q9Y2I8	ENSG00000047056	protein_coding	430.482	-0.136638	0.0959187	-1.42441	0.154329	0.461624
YTHDC2	YTH domain containing 2 [Source:HGNC Symbol;Acc:HGNC:24721]	64848	Q9H6S0	ENSG00000047188	protein_coding	1072.6	0.0138713	0.071825	0.193123	0.846863	0.957344
CTPS2	CTP synthase 2 [Source:HGNC Symbol;Acc:HGNC:2520]	56474	Q9NRF8	ENSG00000047230	protein_coding	1150.8	-0.033457	0.0648915	-0.515581	0.606147	0.871173
ATP6V1H	ATPase H+ transporting V1 subunit H [Source:HGNC Symbol;Acc:HGNC:18303]	51606	Q9UI12	ENSG00000047249	protein_coding	1359.48	-0.140844	0.0648647	-2.17125	0.0299126	0.162109
POLR2B	RNA polymerase II subunit B [Source:HGNC Symbol;Acc:HGNC:9188]	5431		ENSG00000047315	protein_coding	3511.38	0.0394318	0.0488434	0.807315	0.419485	0.765508
FAM214A	family with sequence similarity 214 member A [Source:HGNC Symbol;Acc:HGNC:25609]	56204	Q32MH5	ENSG00000047346	protein_coding	149.951	-0.103988	0.128128	-0.811261	0.417216	0.763596
ARAP2	ArfGAP with RhoGAP domain, ankyrin repeat and PH domain 2 [Source:HGNC Symbol;Acc:HGNC:16924]	116984	Q8WZ64	ENSG00000047365	protein_coding	617.446	-0.00591392	0.0861449	-0.0686504	0.945268	0.985675
TPR	translocated promoter region, nuclear basket protein [Source:HGNC Symbol;Acc:HGNC:12017]	7175	P12270	ENSG00000047410	protein_coding	8426.54	0.0846133	0.0412081	2.05332	0.0400412	0.197512
CP	ceruloplasmin [Source:HGNC Symbol;Acc:HGNC:2295]	1356		ENSG00000047457	protein_coding	62.0075	-0.490914	0.154523	-3.16384	0.00155702	0.017029
KIAA0556	KIAA0556 [Source:HGNC Symbol;Acc:HGNC:29068]	23247	O60303	ENSG00000047578	protein_coding	695.594	-0.0865518	0.0886101	-0.976749	0.328693	0.687853
DTNBP1	dystrobrevin binding protein 1 [Source:HGNC Symbol;Acc:HGNC:17328]	84062	Q96EV8	ENSG00000047579	protein_coding	82.8122	-0.0175453	0.150025	-0.116894	0.906944	0.976001
XK	X-linked Kx blood group [Source:HGNC Symbol;Acc:HGNC:12811]	7504	P51811	ENSG00000047597	protein_coding	59.7341	0.302859	0.153655	1.9709	0.048735	0.224529
ANO2	anoctamin 2 [Source:HGNC Symbol;Acc:HGNC:1183]	57101	Q9NQ90	ENSG00000047617	protein_coding	0.615605	0.0401342	0.0360768	1.12278	0.26153
C12orf4	chromosome 12 open reading frame 4 [Source:HGNC Symbol;Acc:HGNC:1184]	57102	Q9NQ89	ENSG00000047621	protein_coding	474.93	-0.00606757	0.0877326	-0.0691602	0.944862	0.985672
SCML1	Scm polycomb group protein like 1 [Source:HGNC Symbol;Acc:HGNC:10580]	6322	Q9UN30	ENSG00000047634	protein_coding	361.232	0.292061	0.0960313	3.0416	0.00235323	0.0237232
WWC3	WWC family member 3 [Source:HGNC Symbol;Acc:HGNC:29237]	55841	Q9ULE0	ENSG00000047644	protein_coding	2127.08	-0.0755353	0.0582049	-1.29773	0.19438	0.523637
ARHGAP6	Rho GTPase activating protein 6 [Source:HGNC Symbol;Acc:HGNC:676]	395	O43182	ENSG00000047648	protein_coding	4.9063	-0.073809	0.0983293	-0.751501	0.452351	0.787326
FAM184B	family with sequence similarity 184 member B [Source:HGNC Symbol;Acc:HGNC:29235]	27146	Q9ULE4	ENSG00000047662	protein_coding	4.34991	-0.00975939	0.0973928	-0.0999949	0.920348
MAP4	microtubule associated protein 4 [Source:HGNC Symbol;Acc:HGNC:6862]	4134		ENSG00000047849	protein_coding	2433.74	0.0251762	0.0557115	0.451909	0.651334	0.890869
GOPC	golgi associated PDZ and coiled-coil motif containing [Source:HGNC Symbol;Acc:HGNC:17643]	57120	Q9HD26	ENSG00000047932	protein_coding	974.898	0.0639611	0.0690599	0.926184	0.354351	0.710933
ROS1	ROS proto-oncogene 1, receptor tyrosine kinase [Source:HGNC Symbol;Acc:HGNC:10261]	6098	P08922	ENSG00000047936	protein_coding	2.28426	0.0194068	0.0694141	0.278424	0.780687
USP28	ubiquitin specific peptidase 28 [Source:HGNC Symbol;Acc:HGNC:12625]	57646	Q96RU2	ENSG00000048028	protein_coding	1335.11	0.0466641	0.0631622	0.738813	0.460021	0.791129
HDAC9	histone deacetylase 9 [Source:HGNC Symbol;Acc:HGNC:14065]	9734	Q9UKV0	ENSG00000048052	protein_coding	150.981	-0.023189	0.131741	-0.175981	0.860309	0.961196
TSPAN17	tetraspanin 17 [Source:HGNC Symbol;Acc:HGNC:13594]	26262		ENSG00000048140	protein_coding	1328.43	-0.16193	0.0629795	-2.57097	0.0101414	0.072753
NOP16	NOP16 nucleolar protein [Source:HGNC Symbol;Acc:HGNC:26934]	51491		ENSG00000048162	protein_coding	298.247	0.280946	0.104166	2.69734	0.0069896	0.0550403
CC2D2A	coiled-coil and C2 domain containing 2A [Source:HGNC Symbol;Acc:HGNC:29253]	57545		ENSG00000048342	protein_coding	430.99	-0.371287	0.0903726	-4.1054	4.03608e-05	0.000770328
RRM2B	ribonucleotide reductase regulatory TP53 inducible subunit M2B [Source:HGNC Symbol;Acc:HGNC:17296]	50484	Q7LG56	ENSG00000048392	protein_coding	1628.39	0.0947365	0.0585312	1.6186	0.105533	0.368483
ZNF800	zinc finger protein 800 [Source:HGNC Symbol;Acc:HGNC:27267]	168850	Q2TB10	ENSG00000048405	protein_coding	309.716	0.0302687	0.103503	0.292437	0.769953	0.933782
TNFRSF17	TNF receptor superfamily member 17 [Source:HGNC Symbol;Acc:HGNC:11913]	608	Q02223	ENSG00000048462	protein_coding	0.152699	-0.00283079	0.0243034	-0.116473	0.907278
SNX29	sorting nexin 29 [Source:HGNC Symbol;Acc:HGNC:30542]	92017		ENSG00000048471	protein_coding	771.459	-0.635095	0.0807946	-7.85356	4.04405e-15	4.85314e-13
LMO3	LIM domain only 3 [Source:HGNC Symbol;Acc:HGNC:6643]	55885	Q8TAP4	ENSG00000048540	protein_coding	21.1869	-0.06222	0.147113	-0.42286	0.672398	0.898426
MRPS10	mitochondrial ribosomal protein S10 [Source:HGNC Symbol;Acc:HGNC:14502]	55173	P82664	ENSG00000048544	protein_coding	677.621	-0.0629437	0.0784719	-0.802047	0.422526	0.767016
GUCA1A	guanylate cyclase activator 1A [Source:HGNC Symbol;Acc:HGNC:4678]	2978		ENSG00000048545	protein_coding	0
RSF1	remodeling and spacing factor 1 [Source:HGNC Symbol;Acc:HGNC:18118]	51773	Q96T23	ENSG00000048649	protein_coding	2161.92	0.0496487	0.0654193	0.758934	0.447892	0.784203
VPS13D	vacuolar protein sorting 13 homolog D [Source:HGNC Symbol;Acc:HGNC:23595]	55187	Q5THJ4	ENSG00000048707	protein_coding	1583.58	-0.0668846	0.0645715	-1.03581	0.300292	0.658665
CELF2	CUGBP Elav-like family member 2 [Source:HGNC Symbol;Acc:HGNC:2550]	10659		ENSG00000048740	protein_coding	0.453406	-0.00329244	0.0324609	-0.0987479	0.921338
FAM120A	family with sequence similarity 120A [Source:HGNC Symbol;Acc:HGNC:13247]	23196	Q9NZB2	ENSG00000048828	protein_coding	1438.76	0.122119	0.0659226	1.8525	0.0639535	0.26897
R3HDM1	R3H domain containing 1 [Source:HGNC Symbol;Acc:HGNC:9757]	23518	Q15032	ENSG00000048991	protein_coding	264.204	0.160682	0.106577	1.50797	0.131562	0.420868
COL9A2	collagen type IX alpha 2 chain [Source:HGNC Symbol;Acc:HGNC:2218]	1298	Q14055	ENSG00000049089	protein_coding	20.2556	0.463657	0.148722	3.13052	0.00174498	0.0185859
KITLG	KIT ligand [Source:HGNC Symbol;Acc:HGNC:6343]	4254		ENSG00000049130	protein_coding	362.948	0.479432	0.0956646	5.01129	5.40677e-07	1.63331e-05
ERCC8	ERCC excision repair 8, CSA ubiquitin ligase complex subunit [Source:HGNC Symbol;Acc:HGNC:3439]	1161		ENSG00000049167	protein_coding	217.045	0.0682823	0.11579	0.589836	0.5553	0.847004
ADAMTS6	ADAM metallopeptidase with thrombospondin type 1 motif 6 [Source:HGNC Symbol;Acc:HGNC:222]	11174	Q9UKP5	ENSG00000049192	protein_coding	212.955	0.210683	0.119352	1.76549	0.0774807	0.304313
H6PD	hexose-6-phosphate dehydrogenase/glucose 1-dehydrogenase [Source:HGNC Symbol;Acc:HGNC:4795]	9563	O95479	ENSG00000049239	protein_coding	1186.56	-0.250495	0.064285	-3.89608	9.77623e-05	0.00165817
VAMP3	vesicle associated membrane protein 3 [Source:HGNC Symbol;Acc:HGNC:12644]	9341	Q15836	ENSG00000049245	protein_coding	1731.87	0.0420805	0.0573225	0.734115	0.462878	0.793685
PER3	period circadian regulator 3 [Source:HGNC Symbol;Acc:HGNC:8847]	8863		ENSG00000049246	protein_coding	45.2193	-0.0167863	0.157299	-0.106707	0.915022	0.978585
UTS2	urotensin 2 [Source:HGNC Symbol;Acc:HGNC:12636]	10911		ENSG00000049247	protein_coding	0.376264	0.0227081	0.0305146	0.719179	0.47203
TNFRSF9	TNF receptor superfamily member 9 [Source:HGNC Symbol;Acc:HGNC:11924]	3604	Q07011	ENSG00000049249	protein_coding	4.53275	0.133632	0.0963629	1.41386	0.157403	0.465856
EPN3	epsin 3 [Source:HGNC Symbol;Acc:HGNC:18235]	55040	Q9H201	ENSG00000049283	protein_coding	4.57939	-0.0972438	0.0981502	-1.00246	0.31612	0.674798
LTBP1	latent transforming growth factor beta binding protein 1 [Source:HGNC Symbol;Acc:HGNC:6714]	4052	Q14766	ENSG00000049323	protein_coding	26.1708	0.276098	0.154697	1.78651	0.0740169	0.295882
RCN1	reticulocalbin 1 [Source:HGNC Symbol;Acc:HGNC:9934]	5954	Q15293	ENSG00000049449	protein_coding	2579.82	0.0245649	0.0501431	0.489896	0.624207	0.879907
ELN	elastin [Source:HGNC Symbol;Acc:HGNC:3327]	2006		ENSG00000049540	protein_coding	13.3713	-0.162546	0.135973	-1.20098	0.229759	0.574989
RFC2	replication factor C subunit 2 [Source:HGNC Symbol;Acc:HGNC:9970]	5982	P35250	ENSG00000049541	protein_coding	503.325	0.0217827	0.087589	0.248689	0.803601	0.945277
ARID1B	AT-rich interaction domain 1B [Source:HGNC Symbol;Acc:HGNC:18040]	57492	Q8NFD5	ENSG00000049618	protein_coding	525.227	0.0579014	0.0892506	0.648783	0.516479	0.82407
CLPTM1L	CLPTM1 like [Source:HGNC Symbol;Acc:HGNC:24308]	81037	Q96KA5	ENSG00000049656	protein_coding	6677.34	0.471084	0.0500459	9.41305	4.81966e-21	1.04253e-18
NEDD4L	neural precursor cell expressed, developmentally down-regulated 4-like, E3 ubiquitin protein ligase [Source:HGNC Symbol;Acc:HGNC:7728]	23327	Q96PU5	ENSG00000049759	protein_coding	1895.19	-0.0735762	0.0629198	-1.16935	0.242262	0.591324
FOXP3	forkhead box P3 [Source:HGNC Symbol;Acc:HGNC:6106]	50943	Q9BZS1	ENSG00000049768	protein_coding	1.88181	-0.0261402	0.0674826	-0.388525	0.697627
PPP1R3F	protein phosphatase 1 regulatory subunit 3F [Source:HGNC Symbol;Acc:HGNC:14944]	89801	Q6ZSY5	ENSG00000049769	protein_coding	245.937	0.0604567	0.112122	0.539192	0.589754	0.862816
HEXB	hexosaminidase subunit beta [Source:HGNC Symbol;Acc:HGNC:4879]	3074		ENSG00000049860	protein_coding	1380.5	-0.141228	0.0627623	-2.25008	0.0244439	0.139961
PTCD2	pentatricopeptide repeat domain 2 [Source:HGNC Symbol;Acc:HGNC:25734]	79810	Q8WV60	ENSG00000049883	protein_coding	125.009	0.0734231	0.141839	0.517644	0.604707	0.87064
NEXMIF	neurite extension and migration factor [Source:HGNC Symbol;Acc:HGNC:29433]	340533	Q5QGS0	ENSG00000050030	protein_coding	0
JKAMP	JNK1/MAPK8 associated membrane protein [Source:HGNC Symbol;Acc:HGNC:20184]	51528	Q9P055	ENSG00000050130	protein_coding	656.508	-0.0782851	0.0828031	-0.945374	0.344468	0.702447
DKK3	dickkopf WNT signaling pathway inhibitor 3 [Source:HGNC Symbol;Acc:HGNC:2893]	27122	Q9UBP4	ENSG00000050165	protein_coding	4011	0.796954	0.0498754	15.9779	1.82156e-57	6.38312e-54
ARHGEF5	Rho guanine nucleotide exchange factor 5 [Source:HGNC Symbol;Acc:HGNC:13209]	7984		ENSG00000050327	protein_coding	179.159	0.0852434	0.120695	0.706409	0.479934	0.804681
NFE2L3	nuclear factor, erythroid 2 like 3 [Source:HGNC Symbol;Acc:HGNC:7783]	9603	Q9Y4A8	ENSG00000050344	protein_coding	143.558	0.0194496	0.130745	0.148734	0.881764	0.968445
MCUR1	mitochondrial calcium uniporter regulator 1 [Source:HGNC Symbol;Acc:HGNC:21097]	63933	Q96AQ8	ENSG00000050393	protein_coding	1047.3	0.0737569	0.0661537	1.11497	0.264862	0.617846
LIMA1	LIM domain and actin binding 1 [Source:HGNC Symbol;Acc:HGNC:24636]	51474		ENSG00000050405	protein_coding	1176.99	0.194691	0.0655212	2.97156	0.00296294	0.0283681
LETMD1	LETM1 domain containing 1 [Source:HGNC Symbol;Acc:HGNC:24241]	25875		ENSG00000050426	protein_coding	361.729	-0.22506	0.100693	-2.23418	0.0254714	0.143639
SLC4A8	solute carrier family 4 member 8 [Source:HGNC Symbol;Acc:HGNC:11034]	9498	Q2Y0W8	ENSG00000050438	protein_coding	6.89014	0.0685903	0.109087	0.629792	0.528831	0.832712
LAMC3	laminin subunit gamma 3 [Source:HGNC Symbol;Acc:HGNC:6494]	10319	Q9Y6N6	ENSG00000050555	protein_coding	0.411943	-0.0221762	0.0315214	-0.633306	0.526534
PTGER3	prostaglandin E receptor 3 [Source:HGNC Symbol;Acc:HGNC:9595]	5733	P43115	ENSG00000050628	protein_coding	2.69338	0.113899	0.0771134	1.52573	0.127076
TNIP3	TNFAIP3 interacting protein 3 [Source:HGNC Symbol;Acc:HGNC:19315]	79931	Q96KP6	ENSG00000050730	protein_coding	1.86388	-0.000916457	0.0654546	-0.0138529	0.988947
MAPK9	mitogen-activated protein kinase 9 [Source:HGNC Symbol;Acc:HGNC:6886]	5601	P45984	ENSG00000050748	protein_coding	778.811	-0.00442738	0.0770741	-0.057441	0.954194	0.988071
COL23A1	collagen type XXIII alpha 1 chain [Source:HGNC Symbol;Acc:HGNC:22990]	91522	Q86Y22	ENSG00000050767	protein_coding	0.341796	0.0042845	0.0295105	0.145188	0.884562
BCAR1	BCAR1, Cas family scaffolding protein [Source:HGNC Symbol;Acc:HGNC:971]	9564	P56945	ENSG00000050820	protein_coding	1968.05	0.1658	0.0599179	2.76719	0.00565425	0.0467082
FAM160A2	family with sequence similarity 160 member A2 [Source:HGNC Symbol;Acc:HGNC:25378]	84067	Q8N612	ENSG00000051009	protein_coding	442.048	-0.182625	0.0911578	-2.00293	0.0451844	0.214314
HERPUD1	homocysteine inducible ER protein with ubiquitin like domain 1 [Source:HGNC Symbol;Acc:HGNC:13744]	9709	Q15011	ENSG00000051108	protein_coding	1136.41	0.260422	0.0671196	3.8802	0.000104369	0.0017449
HOMER3	homer scaffolding protein 3 [Source:HGNC Symbol;Acc:HGNC:17514]	9454	Q9NSC5	ENSG00000051128	protein_coding	413.085	-0.183338	0.0907707	-2.01916	0.0434703	0.208898
RAD51	RAD51 recombinase [Source:HGNC Symbol;Acc:HGNC:9817]	5888		ENSG00000051180	protein_coding	243.401	0.254538	0.10998	2.31486	0.0206207	0.123848
POLQ	DNA polymerase theta [Source:HGNC Symbol;Acc:HGNC:9186]	10721	O75417	ENSG00000051341	protein_coding	668.131	0.042439	0.0785714	0.540156	0.58909	0.862276
PIK3CB	phosphatidylinositol-4,5-bisphosphate 3-kinase catalytic subunit beta [Source:HGNC Symbol;Acc:HGNC:8976]	5291	P42338	ENSG00000051382	protein_coding	489.643	-0.0685086	0.0884717	-0.774254	0.438781	0.778678
CYBA	cytochrome b-245 alpha chain [Source:HGNC Symbol;Acc:HGNC:2577]	1535	P13498	ENSG00000051523	protein_coding	3293.68	0.101421	0.0550174	1.84345	0.0652626	0.271543
THOC3	THO complex 3 [Source:HGNC Symbol;Acc:HGNC:19072]	84321		ENSG00000051596	protein_coding	368.362	0.0956311	0.100467	0.951888	0.341154	0.698544
HEBP2	heme binding protein 2 [Source:HGNC Symbol;Acc:HGNC:15716]	23593		ENSG00000051620	protein_coding	597.654	-0.041046	0.0810829	-0.506209	0.61271	0.874423
MPHOSPH9	M-phase phosphoprotein 9 [Source:HGNC Symbol;Acc:HGNC:7215]	10198		ENSG00000051825	protein_coding	1223.34	0.0700353	0.0636134	1.10096	0.270914	0.625624
PLEKHA5	pleckstrin homology domain containing A5 [Source:HGNC Symbol;Acc:HGNC:30036]	54477	Q9HAU0	ENSG00000052126	protein_coding	1695.11	-0.040145	0.0577886	-0.694681	0.487255	0.809443
PRSS8	serine protease 8 [Source:HGNC Symbol;Acc:HGNC:9491]	5652	Q16651	ENSG00000052344	protein_coding	0.494495	-0.00531371	0.0354795	-0.146574	0.883468
SIKE1	suppressor of IKBKE 1 [Source:HGNC Symbol;Acc:HGNC:26119]	80143	Q9BRV8	ENSG00000052723	protein_coding	1218.76	0.107479	0.0624482	1.72116	0.0852214	0.322289
RRP12	ribosomal RNA processing 12 homolog [Source:HGNC Symbol;Acc:HGNC:29100]	23223	Q5JTH9	ENSG00000052749	protein_coding	1454.01	0.219724	0.0637689	3.44572	0.000569548	0.00739189
FNIP2	folliculin interacting protein 2 [Source:HGNC Symbol;Acc:HGNC:29280]	57600	Q9P278	ENSG00000052795	protein_coding	342.359	0.0150455	0.100149	0.150239	0.880576	0.968111
MSMO1	methylsterol monooxygenase 1 [Source:HGNC Symbol;Acc:HGNC:10545]	6307	Q15800	ENSG00000052802	protein_coding	1611.86	-0.109438	0.0638902	-1.71286	0.0867383	0.325675
TTC17	tetratricopeptide repeat domain 17 [Source:HGNC Symbol;Acc:HGNC:25596]	55761	Q96AE7	ENSG00000052841	protein_coding	2554.56	-0.104499	0.0541803	-1.9287	0.0537677	0.238557
ALX4	ALX homeobox 4 [Source:HGNC Symbol;Acc:HGNC:450]	60529	Q9H161	ENSG00000052850	protein_coding	2.73034	0.00775809	0.0783683	0.0997578	0.920537
FSTL4	follistatin like 4 [Source:HGNC Symbol;Acc:HGNC:21389]	23105	Q6MZW2	ENSG00000053108	protein_coding	6.04778	0.250548	0.10307	2.54265	0.0110014	0.077212
FOXN3	forkhead box N3 [Source:HGNC Symbol;Acc:HGNC:1928]	1112		ENSG00000053254	protein_coding	3.38513	0.0101694	0.0772732	0.132165	0.894854
METTL24	methyltransferase like 24 [Source:HGNC Symbol;Acc:HGNC:21566]	728464	Q5JXM2	ENSG00000053328	protein_coding	0
AKR7A2	aldo-keto reductase family 7 member A2 [Source:HGNC Symbol;Acc:HGNC:389]	8574	O43488	ENSG00000053371	protein_coding	1492.94	-0.164978	0.0613997	-2.68678	0.00721443	0.0564556
MRTO4	MRT4 homolog, ribosome maturation factor [Source:HGNC Symbol;Acc:HGNC:18477]	51154	Q9UKD2	ENSG00000053372	protein_coding	1337.37	0.0468786	0.0639792	0.732715	0.463732	0.794316
NNAT	neuronatin [Source:HGNC Symbol;Acc:HGNC:7860]	4826	Q16517	ENSG00000053438	protein_coding	16.1703	0.0321725	0.144	0.22354	0.823115	0.950804
USE1	unconventional SNARE in the ER 1 [Source:HGNC Symbol;Acc:HGNC:30882]	55850		ENSG00000053501	protein_coding	218.291	-0.182988	0.119256	-1.53336	0.125188	0.407774
MCF2L2	MCF.2 cell line derived transforming sequence-like 2 [Source:HGNC Symbol;Acc:HGNC:30319]	23101	Q86YR7	ENSG00000053524	protein_coding	13.2054	0.111321	0.131906	0.846134	0.397478	0.747795
NRIP2	nuclear receptor interacting protein 2 [Source:HGNC Symbol;Acc:HGNC:23078]	83714	Q9BQI9	ENSG00000053702	protein_coding	14.095	-0.0107737	0.138274	-0.0779355	0.937879	0.983986
LAMA3	laminin subunit alpha 3 [Source:HGNC Symbol;Acc:HGNC:6483]	3909	Q16787	ENSG00000053747	protein_coding	731.143	0.0932463	0.0795864	1.17166	0.241332	0.590073
AP5M1	adaptor related protein complex 5 mu 1 subunit [Source:HGNC Symbol;Acc:HGNC:20192]	55745	Q9H0R1	ENSG00000053770	protein_coding	618.378	-0.0141017	0.0805901	-0.174974	0.8611	0.961222
ANAPC4	anaphase promoting complex subunit 4 [Source:HGNC Symbol;Acc:HGNC:19990]	29945	Q9UJX5	ENSG00000053900	protein_coding	603.935	0.0844809	0.0819643	1.03074	0.302662	0.66075
KCNQ1	potassium voltage-gated channel subfamily Q member 1 [Source:HGNC Symbol;Acc:HGNC:6294]	3784		ENSG00000053918	protein_coding	1.78212	0.0806477	0.0613621	1.40108	0.16119
TRAPPC3	trafficking protein particle complex 3 [Source:HGNC Symbol;Acc:HGNC:19942]	27095	O43617	ENSG00000054116	protein_coding	1800.5	-0.148949	0.0584669	-2.54745	0.0108514	0.0764795
THRAP3	thyroid hormone receptor associated protein 3 [Source:HGNC Symbol;Acc:HGNC:22964]	9967	Q9Y2W1	ENSG00000054118	protein_coding	4737.32	-0.0662921	0.0432403	-1.5331	0.125252	0.407774
PHPT1	phosphohistidine phosphatase 1 [Source:HGNC Symbol;Acc:HGNC:30033]	29085	Q9NRX4	ENSG00000054148	protein_coding	768.439	-0.0110185	0.076389	-0.144239	0.885312	0.969651
ENTPD2	ectonucleoside triphosphate diphosphohydrolase 2 [Source:HGNC Symbol;Acc:HGNC:3364]	954	Q9Y5L3	ENSG00000054179	protein_coding	9.67403	0.320498	0.125316	2.59672	0.0094118	0.0689063
LY75	lymphocyte antigen 75 [Source:HGNC Symbol;Acc:HGNC:6729]	4065	O60449	ENSG00000054219	protein_coding	0.84574	0.0230186	0.0458849	0.504572	0.613859
ARID4B	AT-rich interaction domain 4B [Source:HGNC Symbol;Acc:HGNC:15550]	51742		ENSG00000054267	protein_coding	2154.67	0.0787097	0.0539205	1.45976	0.144357	0.445138
OPN3	opsin 3 [Source:HGNC Symbol;Acc:HGNC:14007]	23596	Q9H1Y3	ENSG00000054277	protein_coding	262.082	-0.0399007	0.111075	-0.359223	0.719428	0.916446
SDCCAG8	serologically defined colon cancer antigen 8 [Source:HGNC Symbol;Acc:HGNC:10671]	10806	Q86SQ7	ENSG00000054282	protein_coding	348.053	-0.149757	0.0989298	-1.51328	0.130208	0.418447
PTPRN	protein tyrosine phosphatase, receptor type N [Source:HGNC Symbol;Acc:HGNC:9676]	5798	Q16849	ENSG00000054356	protein_coding	0.974346	0.0454567	0.0461729	1.10569	0.268859
HHAT	hedgehog acyltransferase [Source:HGNC Symbol;Acc:HGNC:18270]	55733	Q5VTY9	ENSG00000054392	protein_coding	341.887	0.0207145	0.0988629	0.209548	0.83402	0.953842
KIF1B	kinesin family member 1B [Source:HGNC Symbol;Acc:HGNC:16636]	23095	O60333	ENSG00000054523	protein_coding	711.143	-0.0693914	0.0769159	-0.902112	0.366997	0.721909
FOXC1	forkhead box C1 [Source:HGNC Symbol;Acc:HGNC:3800]	2296	Q12948	ENSG00000054598	protein_coding	993.904	0.168068	0.0729996	2.30242	0.0213113	0.127184
TBC1D22A	TBC1 domain family member 22A [Source:HGNC Symbol;Acc:HGNC:1309]	25771	Q8WUA7	ENSG00000054611	protein_coding	892.547	0.03804	0.0790997	0.480896	0.63059	0.882615
SYNE2	spectrin repeat containing nuclear envelope protein 2 [Source:HGNC Symbol;Acc:HGNC:17084]	23224	Q8WXH0	ENSG00000054654	protein_coding	13964.4	-0.149511	0.0594434	-2.51518	0.011897	0.0815219
PLEKHH1	pleckstrin homology, MyTH4 and FERM domain containing H1 [Source:HGNC Symbol;Acc:HGNC:17733]	57475	Q9ULM0	ENSG00000054690	protein_coding	51.1637	-0.134952	0.156289	-0.863251	0.388	0.739652
ATP9A	ATPase phospholipid transporting 9A (putative) [Source:HGNC Symbol;Acc:HGNC:13540]	10079		ENSG00000054793	protein_coding	792.265	0.105963	0.0771167	1.37414	0.169398	0.486401
SPO11	SPO11, initiator of meiotic double stranded breaks [Source:HGNC Symbol;Acc:HGNC:11250]	23626	Q9Y5K1	ENSG00000054796	protein_coding	0
CBLN4	cerebellin 4 precursor [Source:HGNC Symbol;Acc:HGNC:16231]	140689	Q9NTU7	ENSG00000054803	protein_coding	0.176059	0.00862596	0.0243034	0.354932	0.722641
CHRDL2	chordin like 2 [Source:HGNC Symbol;Acc:HGNC:24168]	25884		ENSG00000054938	protein_coding	99.8811	0.673121	0.143762	4.6741	2.95244e-06	7.585e-05
FAM168A	family with sequence similarity 168 member A [Source:HGNC Symbol;Acc:HGNC:28999]	23201	Q92567	ENSG00000054965	protein_coding	2116.19	0.0122783	0.0664352	0.184817	0.853372	0.959878
RELT	RELT, TNF receptor [Source:HGNC Symbol;Acc:HGNC:13764]	84957	Q969Z4	ENSG00000054967	protein_coding	248.342	0.163009	0.109618	1.48738	0.136913	0.431031
GALC	galactosylceramidase [Source:HGNC Symbol;Acc:HGNC:4115]	2581		ENSG00000054983	protein_coding	0.200205	0.00862596	0.0243034	0.354932	0.722641
NOP58	NOP58 ribonucleoprotein [Source:HGNC Symbol;Acc:HGNC:29926]	51602	Q9Y2X3	ENSG00000055044	protein_coding	1690.48	0.311741	0.0588873	5.29398	1.19683e-07	4.11979e-06
SZRD1	SUZ RNA binding domain containing 1 [Source:HGNC Symbol;Acc:HGNC:30232]	26099	Q7Z422	ENSG00000055070	protein_coding	1113.49	0.0610223	0.0684044	0.892082	0.372349	0.726866
KCNH2	potassium voltage-gated channel subfamily H member 2 [Source:HGNC Symbol;Acc:HGNC:6251]	3757	Q12809	ENSG00000055118	protein_coding	5.81861	0.273517	0.103663	2.74381	0.00607311	0.0494227
CUL1	cullin 1 [Source:HGNC Symbol;Acc:HGNC:2551]	8454	Q13616	ENSG00000055130	protein_coding	1598.86	0.0963934	0.0612024	1.57503	0.11525	0.388239
FAM114A2	family with sequence similarity 114 member A2 [Source:HGNC Symbol;Acc:HGNC:1333]	10827	Q9NRY5	ENSG00000055147	protein_coding	480.374	-0.10401	0.0873064	-1.19118	0.233585	0.580351
CYFIP2	cytoplasmic FMR1 interacting protein 2 [Source:HGNC Symbol;Acc:HGNC:13760]	26999	Q96F07	ENSG00000055163	protein_coding	252.4	-0.0757828	0.111235	-0.681184	0.495755	0.814716
TAB2	TGF-beta activated kinase 1/MAP3K7 binding protein 2 [Source:HGNC Symbol;Acc:HGNC:17075]	23118		ENSG00000055208	protein_coding	706.106	0.121883	0.0759985	1.60383	0.108751	0.374969
GINM1	glycoprotein integral membrane 1 [Source:HGNC Symbol;Acc:HGNC:21074]	116254	Q9NU53	ENSG00000055211	protein_coding	500.994	-0.189342	0.0846994	-2.23491	0.025423	0.143458
EIF2AK2	eukaryotic translation initiation factor 2 alpha kinase 2 [Source:HGNC Symbol;Acc:HGNC:9437]	5610	P19525	ENSG00000055332	protein_coding	2570.63	0.309889	0.0540672	5.73166	9.94539e-09	4.2192e-07
USP36	ubiquitin specific peptidase 36 [Source:HGNC Symbol;Acc:HGNC:20062]	57602		ENSG00000055483	protein_coding	648.273	0.0523394	0.0797402	0.656383	0.511578	0.822139
KMT2C	lysine methyltransferase 2C [Source:HGNC Symbol;Acc:HGNC:13726]	58508		ENSG00000055609	protein_coding	1020.49	0.0355007	0.0715398	0.496246	0.619721	0.877755
MCOLN3	mucolipin 3 [Source:HGNC Symbol;Acc:HGNC:13358]	55283	Q8TDD5	ENSG00000055732	protein_coding	0.981996	-0.0136592	0.0488188	-0.283526	0.776774
CCDC85A	coiled-coil domain containing 85A [Source:HGNC Symbol;Acc:HGNC:29400]	114800	Q96PX6	ENSG00000055813	protein_coding	34.4958	-0.194418	0.157212	-1.23774	0.215813	0.555584
PUM2	pumilio RNA binding family member 2 [Source:HGNC Symbol;Acc:HGNC:14958]	23369	Q8TB72	ENSG00000055917	protein_coding	1404.75	-0.0550221	0.0679537	-0.809676	0.418127	0.764398
MRPL43	mitochondrial ribosomal protein L43 [Source:HGNC Symbol;Acc:HGNC:14517]	84545		ENSG00000055950	protein_coding	962.301	-0.129581	0.0711734	-1.8205	0.0686835	0.281235
ITIH4	inter-alpha-trypsin inhibitor heavy chain family member 4 [Source:HGNC Symbol;Acc:HGNC:6169]	3700	Q14624	ENSG00000055955	protein_coding	9.60329	0.147256	0.127484	1.15574	0.247789	0.598258
ITIH1	inter-alpha-trypsin inhibitor heavy chain 1 [Source:HGNC Symbol;Acc:HGNC:6166]	3697	P19827	ENSG00000055957	protein_coding	0.78251	0.0517622	0.0405652	1.38061	0.1674
HPF1	histone PARylation factor 1 [Source:HGNC Symbol;Acc:HGNC:26051]	54969	Q9NWY4	ENSG00000056050	protein_coding	308.971	0.0403379	0.102634	0.393038	0.694292	0.90655
ZFR	zinc finger RNA binding protein [Source:HGNC Symbol;Acc:HGNC:17277]	51663	Q96KR1	ENSG00000056097	protein_coding	4047.68	0.146478	0.0439174	3.33534	0.000851939	0.010402
ZNF280C	zinc finger protein 280C [Source:HGNC Symbol;Acc:HGNC:25955]	55609	Q8ND82	ENSG00000056277	protein_coding	276.833	0.157664	0.105571	1.49369	0.135258	0.428239
NPFFR2	neuropeptide FF receptor 2 [Source:HGNC Symbol;Acc:HGNC:4525]	10886	Q9Y5X5	ENSG00000056291	protein_coding	124.705	-0.0140227	0.133739	-0.10484	0.916503	0.978742
PHF21B	PHD finger protein 21B [Source:HGNC Symbol;Acc:HGNC:25161]	112885		ENSG00000056487	protein_coding	38.799	-0.0854775	0.157917	-0.541307	0.588296	0.861906
TRAF1	TNF receptor associated factor 1 [Source:HGNC Symbol;Acc:HGNC:12031]	7185	Q13077	ENSG00000056558	protein_coding	4.23324	0.00135578	0.0942144	0.0143719	0.988533
RC3H2	ring finger and CCCH-type domains 2 [Source:HGNC Symbol;Acc:HGNC:21461]	54542	Q9HBD1	ENSG00000056586	protein_coding	1078.36	-0.0260814	0.0644641	-0.404585	0.685783	0.903904
IL17RB	interleukin 17 receptor B [Source:HGNC Symbol;Acc:HGNC:18015]	55540	Q9NRM6	ENSG00000056736	protein_coding	27.6451	-0.079532	0.155764	-0.510262	0.609868	0.873426
TRAF3IP2	TRAF3 interacting protein 2 [Source:HGNC Symbol;Acc:HGNC:1343]	10758	O43734	ENSG00000056972	protein_coding	172.343	0.1715	0.124159	1.38145	0.167139	0.482606
GYG2	glycogenin 2 [Source:HGNC Symbol;Acc:HGNC:4700]	8908	O15488	ENSG00000056998	protein_coding	457.727	-0.0363995	0.0917567	-0.396681	0.691603	0.904797
DCBLD2	discoidin, CUB and LCCL domain containing 2 [Source:HGNC Symbol;Acc:HGNC:24627]	131566	Q96PD2	ENSG00000057019	protein_coding	5235.67	-0.21013	0.0467077	-4.49872	6.83632e-06	0.000159705
SERPINB3	serpin family B member 3 [Source:HGNC Symbol;Acc:HGNC:10569]	6317	P29508	ENSG00000057149	protein_coding	0
SOAT1	sterol O-acyltransferase 1 [Source:HGNC Symbol;Acc:HGNC:11177]	6646	P35610	ENSG00000057252	protein_coding	3092.67	0.151853	0.050978	2.97884	0.00289339	0.0278208
PKP2	plakophilin 2 [Source:HGNC Symbol;Acc:HGNC:9024]	5318	Q99959	ENSG00000057294	protein_coding	370.657	0.026002	0.0946086	0.274851	0.783431	0.938909
MSH4	mutS homolog 4 [Source:HGNC Symbol;Acc:HGNC:7327]	4438	O15457	ENSG00000057468	protein_coding	3.02219	0.0355783	0.083584	0.426031	0.670085
F7	coagulation factor VII [Source:HGNC Symbol;Acc:HGNC:3544]	2155	P08709	ENSG00000057593	protein_coding	0.576469	0.0385934	0.0354297	1.07148	0.283955
GDI2	GDP dissociation inhibitor 2 [Source:HGNC Symbol;Acc:HGNC:4227]	2665	P50395	ENSG00000057608	protein_coding	9994.78	-0.0351133	0.0433506	-0.809984	0.417949	0.76417
PRDM1	PR/SET domain 1 [Source:HGNC Symbol;Acc:HGNC:9346]	639	O75626	ENSG00000057657	protein_coding	14.9424	0.0417201	0.141306	0.294538	0.768347	0.933232
ATG5	autophagy related 5 [Source:HGNC Symbol;Acc:HGNC:589]	9474		ENSG00000057663	protein_coding	1135.42	0.126026	0.0684872	1.84021	0.0657371	0.272934
TMCC3	transmembrane and coiled-coil domain family 3 [Source:HGNC Symbol;Acc:HGNC:29199]	57458	Q9ULS5	ENSG00000057704	protein_coding	1.01265	0.0350649	0.0493212	0.722143	0.470207
PITHD1	PITH domain containing 1 [Source:HGNC Symbol;Acc:HGNC:25022]	57095	Q9GZP4	ENSG00000057757	protein_coding	1192.3	0.0775915	0.0682435	1.13702	0.25553	0.606974
MTA3	metastasis associated 1 family member 3 [Source:HGNC Symbol;Acc:HGNC:23784]	57504		ENSG00000057935	protein_coding	557.665	-0.0710414	0.084194	-0.843706	0.398834	0.74842
USP13	ubiquitin specific peptidase 13 [Source:HGNC Symbol;Acc:HGNC:12611]	8975	Q92995	ENSG00000058056	protein_coding	1029.25	-0.207549	0.0707212	-2.93431	0.00334285	0.0309077
ATP11B	ATPase phospholipid transporting 11B (putative) [Source:HGNC Symbol;Acc:HGNC:13553]	23200	Q9Y2G3	ENSG00000058063	protein_coding	1876.63	0.0971531	0.0568535	1.70887	0.0874752	0.327503
LAMC2	laminin subunit gamma 2 [Source:HGNC Symbol;Acc:HGNC:6493]	3918	Q13753	ENSG00000058085	protein_coding	366.857	-0.0445858	0.10305	-0.432613	0.665296	0.895907
CDK14	cyclin dependent kinase 14 [Source:HGNC Symbol;Acc:HGNC:8883]	5218		ENSG00000058091	protein_coding	690.099	-0.0221362	0.0786193	-0.281568	0.778274	0.93634
SEC61A1	Sec61 translocon alpha 1 subunit [Source:HGNC Symbol;Acc:HGNC:18276]	29927		ENSG00000058262	protein_coding	6699.76	0.0709945	0.0416859	1.70309	0.0885507	0.329615
PPP1R12A	protein phosphatase 1 regulatory subunit 12A [Source:HGNC Symbol;Acc:HGNC:7618]	4659	O14974	ENSG00000058272	protein_coding	3547.11	0.0299222	0.0470404	0.636097	0.524713	0.829138
RASGRF1	Ras protein specific guanine nucleotide releasing factor 1 [Source:HGNC Symbol;Acc:HGNC:9875]	5923	Q13972	ENSG00000058335	protein_coding	0.799893	-0.0247573	0.0427409	-0.626549	0.530955
CAMK2B	calcium/calmodulin dependent protein kinase II beta [Source:HGNC Symbol;Acc:HGNC:1461]	816	Q13554	ENSG00000058404	protein_coding	2.64622	0.0264745	0.075341	0.350807	0.725733
CROCC	ciliary rootlet coiled-coil, rootletin [Source:HGNC Symbol;Acc:HGNC:21299]	9696	Q5TZA2	ENSG00000058453	protein_coding	755.429	-0.164849	0.0839301	-1.96374	0.0495599	0.226682
POLR3E	RNA polymerase III subunit E [Source:HGNC Symbol;Acc:HGNC:30347]	55718	Q9NVU0	ENSG00000058600	protein_coding	1013.96	0.0341039	0.067704	0.503727	0.614453	0.875342
ATP2B4	ATPase plasma membrane Ca2+ transporting 4 [Source:HGNC Symbol;Acc:HGNC:817]	493	P23634	ENSG00000058668	protein_coding	673.506	0.216954	0.0803433	2.70063	0.00692077	0.0546528
ZC3H11A	zinc finger CCCH-type containing 11A [Source:HGNC Symbol;Acc:HGNC:29093]	9877		ENSG00000058673	protein_coding	18.8142	0.127554	0.14797	0.860883	0.389302	0.740444
RIOK2	RIO kinase 2 [Source:HGNC Symbol;Acc:HGNC:18999]	55781	Q9BVS4	ENSG00000058729	protein_coding	836.45	0.164299	0.0743142	2.21098	0.027037	0.150148
YIPF1	Yip1 domain family member 1 [Source:HGNC Symbol;Acc:HGNC:25231]	54432	Q9Y548	ENSG00000058799	protein_coding	382.674	-0.0701202	0.0940597	-0.745444	0.456003	0.789645
NDC1	NDC1 transmembrane nucleoporin [Source:HGNC Symbol;Acc:HGNC:25525]	55706	Q9BTX1	ENSG00000058804	protein_coding	2215.68	0.100994	0.0554486	1.82141	0.0685443	0.280993
DGKG	diacylglycerol kinase gamma [Source:HGNC Symbol;Acc:HGNC:2853]	1608	P49619	ENSG00000058866	protein_coding	198.611	0.152122	0.12076	1.25994	0.207692	0.543368
FLYWCH1	FLYWCH-type zinc finger 1 [Source:HGNC Symbol;Acc:HGNC:25404]	84256	Q4VC44	ENSG00000059122	protein_coding	596.717	-0.0518022	0.0805518	-0.643046	0.520194	0.826677
UNKL	unkempt family like zinc finger [Source:HGNC Symbol;Acc:HGNC:14184]	64718		ENSG00000059145	protein_coding	318.464	-0.124104	0.102626	-1.20898	0.226672	0.570221
TBXAS1	thromboxane A synthase 1 [Source:HGNC Symbol;Acc:HGNC:11609]	6916	P24557	ENSG00000059377	protein_coding	45.873	0.308866	0.157397	1.96363	0.0495727	0.226682
PARP12	poly(ADP-ribose) polymerase family member 12 [Source:HGNC Symbol;Acc:HGNC:21919]	64761	Q9H0J9	ENSG00000059378	protein_coding	989.642	0.539787	0.0677101	7.97182	1.56356e-15	2.03716e-13
ALDH18A1	aldehyde dehydrogenase 18 family member A1 [Source:HGNC Symbol;Acc:HGNC:9722]	5832	P54886	ENSG00000059573	protein_coding	5123.23	0.0134775	0.047025	0.286604	0.774415	0.935567
TARBP1	TAR (HIV-1) RNA binding protein 1 [Source:HGNC Symbol;Acc:HGNC:11568]	6894	Q13395	ENSG00000059588	protein_coding	933.404	-0.105721	0.0683788	-1.54601	0.122102	0.402663
GATB	glutamyl-tRNA amidotransferase subunit B [Source:HGNC Symbol;Acc:HGNC:8849]	5188	O75879	ENSG00000059691	protein_coding	281.667	-0.148624	0.105171	-1.41274	0.157733	0.466461
MXD1	MAX dimerization protein 1 [Source:HGNC Symbol;Acc:HGNC:6761]	4084		ENSG00000059728	protein_coding	135.651	-0.00870958	0.13777	-0.0632099	0.949599	0.986128
CDK17	cyclin dependent kinase 17 [Source:HGNC Symbol;Acc:HGNC:8750]	5128	Q00537	ENSG00000059758	protein_coding	1636.29	-0.0454588	0.0575145	-0.790385	0.429303	0.772324
DNAJC25	DnaJ heat shock protein family (Hsp40) member C25 [Source:HGNC Symbol;Acc:HGNC:34187]	548645	Q9H1X3	ENSG00000059769	protein_coding	154.539	-0.131184	0.126088	-1.0399	0.298388	0.656708
SLC2A3	solute carrier family 2 member 3 [Source:HGNC Symbol;Acc:HGNC:11007]	6515	P11169	ENSG00000059804	protein_coding	4.92408	0.118254	0.0965631	1.23589	0.216499	0.556511
PSD	pleckstrin and Sec7 domain containing [Source:HGNC Symbol;Acc:HGNC:9507]	5662	A5PKW4	ENSG00000059915	protein_coding	11.877	0.00201717	0.133527	0.0150598	0.987984	0.99686
CTDP1	CTD phosphatase subunit 1 [Source:HGNC Symbol;Acc:HGNC:2498]	9150	Q9Y5B0	ENSG00000060069	protein_coding	666.017	-0.00648296	0.0781175	-0.0829883	0.933861	0.983596
YBX3	Y-box binding protein 3 [Source:HGNC Symbol;Acc:HGNC:2428]	8531	P16989	ENSG00000060138	protein_coding	5377.32	-0.107033	0.0610399	-1.75348	0.0795203	0.309782
STYK1	serine/threonine/tyrosine kinase 1 [Source:HGNC Symbol;Acc:HGNC:18889]	55359	Q6J9G0	ENSG00000060140	protein_coding	62.8864	0.0834801	0.154116	0.541439	0.588205	0.861844
WNK1	WNK lysine deficient protein kinase 1 [Source:HGNC Symbol;Acc:HGNC:14540]	65125		ENSG00000060237	protein_coding	1804.83	0.0841002	0.0604183	1.39199	0.163926	0.476625
				ENSG00000060303		2.67867	-0.05059	0.0804646	-0.6371	0.52406
CCAR1	cell division cycle and apoptosis regulator 1 [Source:HGNC Symbol;Acc:HGNC:24236]	55749		ENSG00000060339	protein_coding	2076.91	0.147278	0.0546521	2.69488	0.00704144	0.0553491
OGFR	opioid growth factor receptor [Source:HGNC Symbol;Acc:HGNC:15768]	11054	Q9NZT2	ENSG00000060491	protein_coding	1702.41	0.156888	0.057987	2.70563	0.00681747	0.0540009
GNA15	G protein subunit alpha 15 [Source:HGNC Symbol;Acc:HGNC:4383]	2769	P30679	ENSG00000060558	protein_coding	0.1266	-0.00283079	0.0243034	-0.116473	0.907278
CREB3L3	cAMP responsive element binding protein 3 like 3 [Source:HGNC Symbol;Acc:HGNC:18855]	84699	Q68CJ9	ENSG00000060566	protein_coding	0
PIGV	phosphatidylinositol glycan anchor biosynthesis class V [Source:HGNC Symbol;Acc:HGNC:26031]	55650		ENSG00000060642	protein_coding	271.104	-0.220378	0.107994	-2.0398	0.04137	0.201963
PTPRU	protein tyrosine phosphatase, receptor type U [Source:HGNC Symbol;Acc:HGNC:9683]	10076	Q92729	ENSG00000060656	protein_coding	18.6123	0.24292	0.148095	1.64069	0.100862	0.357805
SNRNP40	small nuclear ribonucleoprotein U5 subunit 40 [Source:HGNC Symbol;Acc:HGNC:30857]	9410	Q96DI7	ENSG00000060688	protein_coding	1783.59	0.147336	0.0579037	2.54455	0.0109418	0.076931
RIMBP2	RIMS binding protein 2 [Source:HGNC Symbol;Acc:HGNC:30339]	23504	O15034	ENSG00000060709	protein_coding	9.92996	-0.0637819	0.128453	-0.49566	0.620135	0.877763
COL11A1	collagen type XI alpha 1 chain [Source:HGNC Symbol;Acc:HGNC:2186]	1301	P12107	ENSG00000060718	protein_coding	10.3488	0.0498186	0.129851	0.384399	0.700683	0.909699
QSER1	glutamine and serine rich 1 [Source:HGNC Symbol;Acc:HGNC:26154]	79832	Q2KHR3	ENSG00000060749	protein_coding	846.433	0.150208	0.0710512	2.11419	0.0344994	0.179154
MPC1	mitochondrial pyruvate carrier 1 [Source:HGNC Symbol;Acc:HGNC:21606]	51660	Q9Y5U8	ENSG00000060762	protein_coding	278.245	-0.0361118	0.10796	-0.334425	0.738059	0.923549
ACAA1	acetyl-CoA acyltransferase 1 [Source:HGNC Symbol;Acc:HGNC:82]	30	P09110	ENSG00000060971	protein_coding	233.539	-0.0129321	0.114278	-0.113156	0.909907	0.976701
BCAT1	branched chain amino acid transaminase 1 [Source:HGNC Symbol;Acc:HGNC:976]	586	P54687	ENSG00000060982	protein_coding	4519.55	0.173773	0.0456459	3.80701	0.000140656	0.00226719
HDAC7	histone deacetylase 7 [Source:HGNC Symbol;Acc:HGNC:14067]	51564	Q8WUI4	ENSG00000061273	protein_coding	672.239	0.161953	0.0789167	2.05236	0.040135	0.197772
LZTS1	leucine zipper tumor suppressor 1 [Source:HGNC Symbol;Acc:HGNC:13861]	11178	Q9Y250	ENSG00000061337	protein_coding	19.2618	-0.0392696	0.14967	-0.262624	0.79284	0.94127
PRDM6	PR/SET domain 6 [Source:HGNC Symbol;Acc:HGNC:9350]	93166	Q9NQX0	ENSG00000061455	protein_coding	46.7831	-0.23479	0.15717	-1.49155	0.135818	0.429078
WNT8A	Wnt family member 8A [Source:HGNC Symbol;Acc:HGNC:12788]	7478		ENSG00000061492	protein_coding	0
SPAG4	sperm associated antigen 4 [Source:HGNC Symbol;Acc:HGNC:11214]	6676	Q9NPE6	ENSG00000061656	protein_coding	360.029	-0.270645	0.110309	-2.45292	0.0141702	0.0931967
NCKAP1	NCK associated protein 1 [Source:HGNC Symbol;Acc:HGNC:7666]	10787	Q9Y2A7	ENSG00000061676	protein_coding	5826.01	0.0194192	0.0440807	0.440538	0.659548	0.894305
MRPS35	mitochondrial ribosomal protein S35 [Source:HGNC Symbol;Acc:HGNC:16635]	60488	P82673	ENSG00000061794	protein_coding	2427.63	0.149866	0.0562269	2.66543	0.00768895	0.0594782
GUCY1B1	guanylate cyclase 1 soluble subunit beta 1 [Source:HGNC Symbol;Acc:HGNC:4687]	2983		ENSG00000061918	protein_coding	860.453	-0.147481	0.0783522	-1.88217	0.0598128	0.256784
SFSWAP	splicing factor SWAP [Source:HGNC Symbol;Acc:HGNC:10790]	6433	Q12872	ENSG00000061936	protein_coding	934.081	-0.0180637	0.0756246	-0.238863	0.811211	0.947622
TNK2	tyrosine kinase non receptor 2 [Source:HGNC Symbol;Acc:HGNC:19297]	10188		ENSG00000061938	protein_coding	185.837	-0.279461	0.124127	-2.24889	0.0245198	0.140213
MON2	MON2 homolog, regulator of endosome-to-Golgi trafficking [Source:HGNC Symbol;Acc:HGNC:29177]	23041		ENSG00000061987	protein_coding	1156.81	0.0339059	0.0712621	0.475789	0.634225	0.884439
CDH3	cadherin 3 [Source:HGNC Symbol;Acc:HGNC:1762]	1001	P22223	ENSG00000062038	protein_coding	0
ARSF	arylsulfatase F [Source:HGNC Symbol;Acc:HGNC:721]	416	P54793	ENSG00000062096	protein_coding	0
GPBP1	GC-rich promoter binding protein 1 [Source:HGNC Symbol;Acc:HGNC:29520]	65056		ENSG00000062194	protein_coding	2143.94	0.0927045	0.0558916	1.65867	0.0971821	0.349493
DGAT2	diacylglycerol O-acyltransferase 2 [Source:HGNC Symbol;Acc:HGNC:16940]	84649		ENSG00000062282	protein_coding	19.146	0.428264	0.146102	2.9416	0.00326525	0.0304149
ZNF112	zinc finger protein 112 [Source:HGNC Symbol;Acc:HGNC:12892]	7771	Q9UJU3	ENSG00000062370	protein_coding	185.739	-0.139088	0.121783	-1.14188	0.253505	0.604279
CS	citrate synthase [Source:HGNC Symbol;Acc:HGNC:2422]	1431		ENSG00000062485	protein_coding	804.391	0.0757769	0.0726355	1.04328	0.296816	0.65504
LTK	leukocyte receptor tyrosine kinase [Source:HGNC Symbol;Acc:HGNC:6721]	4058	P29376	ENSG00000062524	protein_coding	2.82508	0.160235	0.0769237	2.19621	0.0280768
MRPS24	mitochondrial ribosomal protein S24 [Source:HGNC Symbol;Acc:HGNC:14510]	64951	Q96EL2	ENSG00000062582	protein_coding	79.6694	0.0216162	0.150129	0.144043	0.885467	0.969651
ELMO2	engulfment and cell motility 2 [Source:HGNC Symbol;Acc:HGNC:17233]	63916	Q96JJ3	ENSG00000062598	protein_coding	452.663	-0.102992	0.094434	-1.09052	0.275484	0.631527
WAPL	WAPL cohesin release factor [Source:HGNC Symbol;Acc:HGNC:23293]	23063	Q7Z5K2	ENSG00000062650	protein_coding	2919.57	0.0923637	0.0502597	1.83774	0.0661006	0.273946
VMP1	vacuole membrane protein 1 [Source:HGNC Symbol;Acc:HGNC:29559]	81671	Q96GC9	ENSG00000062716	protein_coding	9125.51	-0.01421	0.0384373	-0.369692	0.711612	0.913711
APPBP2	amyloid beta precursor protein binding protein 2 [Source:HGNC Symbol;Acc:HGNC:622]	10513	Q92624	ENSG00000062725	protein_coding	6584.37	-0.0333066	0.0455156	-0.731764	0.464312	0.794533
POLD1	DNA polymerase delta 1, catalytic subunit [Source:HGNC Symbol;Acc:HGNC:9175]	5424		ENSG00000062822	protein_coding	1536.64	0.158601	0.0613677	2.58448	0.00975269	0.0705811
SEZ6	seizure related 6 homolog [Source:HGNC Symbol;Acc:HGNC:15955]	124925	Q53EL9	ENSG00000063015	protein_coding	7.55825	0.0435059	0.116598	0.37399	0.708412	0.913111
EIF4B	eukaryotic translation initiation factor 4B [Source:HGNC Symbol;Acc:HGNC:3285]	1975	P23588	ENSG00000063046	protein_coding	14615.5	-0.0924176	0.0527649	-1.75149	0.0798608	0.310666
SLC6A16	solute carrier family 6 member 16 [Source:HGNC Symbol;Acc:HGNC:13622]	28968	Q9GZN6	ENSG00000063127	protein_coding	2.29584	-0.0163469	0.0723726	-0.228246	0.819455
BICRA	BRD4 interacting chromatin remodeling complex associated protein [Source:HGNC Symbol;Acc:HGNC:4332]	29998	Q9NZM4	ENSG00000063169	protein_coding	26.0402	-0.143908	0.154149	-0.932985	0.350828	0.70792
SPHK2	sphingosine kinase 2 [Source:HGNC Symbol;Acc:HGNC:18859]	56848	Q9NRA0	ENSG00000063176	protein_coding	173.178	0.0498777	0.12229	0.407874	0.683366	0.90262
RPL18	ribosomal protein L18 [Source:HGNC Symbol;Acc:HGNC:10310]	6141	Q07020	ENSG00000063177	protein_coding	12290.5	0.0262027	0.0476464	0.549942	0.582359	0.859388
CA11	carbonic anhydrase 11 [Source:HGNC Symbol;Acc:HGNC:1370]	770	O75493	ENSG00000063180	protein_coding	31.2756	0.419132	0.156114	2.68471	0.00725938	0.0567566
ISOC2	isochorismatase domain containing 2 [Source:HGNC Symbol;Acc:HGNC:26278]	79763	Q96AB3	ENSG00000063241	protein_coding	1626.16	-0.0620199	0.058969	-1.05171	0.29293	0.651732
U2AF2	U2 small nuclear RNA auxiliary factor 2 [Source:HGNC Symbol;Acc:HGNC:23156]	11338	P26368	ENSG00000063244	protein_coding	3930.44	-0.0232952	0.0451624	-0.515807	0.605989	0.871147
EPN1	epsin 1 [Source:HGNC Symbol;Acc:HGNC:21604]	29924	Q9Y6I3	ENSG00000063245	protein_coding	691.306	-0.0781182	0.0795721	-0.981704	0.326246	0.685483
MED29	mediator complex subunit 29 [Source:HGNC Symbol;Acc:HGNC:23074]	55588		ENSG00000063322	protein_coding	744.237	-0.124709	0.0742028	-1.6805	0.0928607	0.338961
AHRR	aryl-hydrocarbon receptor repressor [Source:HGNC Symbol;Acc:HGNC:346]	57491	A9YTQ3	ENSG00000063438	protein_coding	63.0178	0.468083	0.154035	3.03659	0.00239274	0.0240523
GSC2	goosecoid homeobox 2 [Source:HGNC Symbol;Acc:HGNC:4613]	2928	O15499	ENSG00000063515	protein_coding	0.152699	-0.00283079	0.0243034	-0.116473	0.907278
ZNF275	zinc finger protein 275 [Source:HGNC Symbol;Acc:HGNC:13069]	10838		ENSG00000063587	protein_coding	374.98	0.00742678	0.0989163	0.0750823	0.940149	0.984583
MTMR1	myotubularin related protein 1 [Source:HGNC Symbol;Acc:HGNC:7449]	8776		ENSG00000063601	protein_coding	786.193	0.114322	0.0744212	1.53625	0.124477	0.406701
GPC1	glypican 1 [Source:HGNC Symbol;Acc:HGNC:4449]	2817	P35052	ENSG00000063660	protein_coding	1998.81	0.454773	0.0595001	7.6432	2.11881e-14	2.20974e-12
ADCK1	aarF domain containing kinase 1 [Source:HGNC Symbol;Acc:HGNC:19038]	57143	Q86TW2	ENSG00000063761	protein_coding	108.498	-0.0532315	0.144025	-0.369586	0.711691	0.913711
HAGH	hydroxyacylglutathione hydrolase [Source:HGNC Symbol;Acc:HGNC:4805]	3029		ENSG00000063854	protein_coding	674.915	-0.416703	0.081613	-5.10327	3.33829e-07	1.04821e-05
RNF4	ring finger protein 4 [Source:HGNC Symbol;Acc:HGNC:10067]	6047		ENSG00000063978	protein_coding	1867.16	-0.0298879	0.0595374	-0.502007	0.615662	0.875854
CASP8	caspase 8 [Source:HGNC Symbol;Acc:HGNC:1509]	841	Q14790	ENSG00000064012	protein_coding	2411.32	0.0705569	0.0552081	1.27803	0.20124	0.53496
LIMCH1	LIM and calponin homology domains 1 [Source:HGNC Symbol;Acc:HGNC:29191]	22998	Q9UPQ0	ENSG00000064042	protein_coding	1127.58	-0.0587502	0.0645234	-0.910496	0.362561	0.717515
INTS13	integrator complex subunit 13 [Source:HGNC Symbol;Acc:HGNC:20174]	55726		ENSG00000064102	protein_coding	826.403	-0.0151493	0.0736665	-0.20565	0.837064	0.954599
TM7SF3	transmembrane 7 superfamily member 3 [Source:HGNC Symbol;Acc:HGNC:23049]	51768	Q9NS93	ENSG00000064115	protein_coding	2606.41	-0.000290072	0.0538102	-0.00539097	0.995699	0.99912
DLX3	distal-less homeobox 3 [Source:HGNC Symbol;Acc:HGNC:2916]	1747	O60479	ENSG00000064195	protein_coding	0
SPA17	sperm autoantigenic protein 17 [Source:HGNC Symbol;Acc:HGNC:11210]	53340	Q15506	ENSG00000064199	protein_coding	47.2067	-0.204159	0.157496	-1.29432	0.195556	0.525317
TSPAN32	tetraspanin 32 [Source:HGNC Symbol;Acc:HGNC:13410]	10077		ENSG00000064201	protein_coding	7.23606	-0.0114734	0.116677	-0.0982353	0.921745	0.980684
WISP2	WNT1 inducible signaling pathway protein 2 [Source:HGNC Symbol;Acc:HGNC:12770]	8839	O76076	ENSG00000064205	protein_coding	40.7257	0.239953	0.157928	1.51772	0.129084	0.416134
DMRT3	doublesex and mab-3 related transcription factor 3 [Source:HGNC Symbol;Acc:HGNC:13909]	58524	Q9NQL9	ENSG00000064218	protein_coding	0.215196	0.00862596	0.0243034	0.354932	0.722641
ST3GAL6	ST3 beta-galactoside alpha-2,3-sialyltransferase 6 [Source:HGNC Symbol;Acc:HGNC:18080]	10402	Q9Y274	ENSG00000064225	protein_coding	123.035	0.0881758	0.139145	0.633517	0.526396	0.830003
ATP2C2	ATPase secretory pathway Ca2+ transporting 2 [Source:HGNC Symbol;Acc:HGNC:29103]	9914	O75185	ENSG00000064270	protein_coding	11.4856	-0.0645253	0.127829	-0.505553	0.61317	0.874795
NGFR	nerve growth factor receptor [Source:HGNC Symbol;Acc:HGNC:7809]	4804	P08138	ENSG00000064300	protein_coding	3.04731	0.0313235	0.0818694	0.383811	0.701118
CDON	cell adhesion associated, oncogene regulated [Source:HGNC Symbol;Acc:HGNC:17104]	50937	Q4KMG0	ENSG00000064309	protein_coding	60.3077	-0.0295024	0.1546	-0.190913	0.848594	0.95802
TAF2	TATA-box binding protein associated factor 2 [Source:HGNC Symbol;Acc:HGNC:11536]	6873	Q6P1X5	ENSG00000064313	protein_coding	1582.23	0.126907	0.0563784	2.25105	0.0243826	0.139656
HIPK2	homeodomain interacting protein kinase 2 [Source:HGNC Symbol;Acc:HGNC:14402]	28996	Q9H2X6	ENSG00000064393	protein_coding	826.587	0.360378	0.0769686	4.68227	2.83713e-06	7.32096e-05
TNPO3	transportin 3 [Source:HGNC Symbol;Acc:HGNC:17103]	23534	Q9Y5L0	ENSG00000064419	protein_coding	3535.79	-0.116457	0.048334	-2.40939	0.0159791	0.102179
BORCS8-MEF2B	BORCS8-MEF2B readthrough [Source:HGNC Symbol;Acc:HGNC:39979]	4207		ENSG00000064489	protein_coding	0.152699	-0.00283079	0.0243034	-0.116473	0.907278
RFXANK	regulatory factor X associated ankyrin containing protein [Source:HGNC Symbol;Acc:HGNC:9987]	8625		ENSG00000064490	protein_coding	804.505	-0.0885639	0.077399	-1.14419	0.252545	0.603458
TMEM161A	transmembrane protein 161A [Source:HGNC Symbol;Acc:HGNC:26020]	54929	Q9NX61	ENSG00000064545	protein_coding	558.874	0.0475257	0.0846701	0.561337	0.574568	0.855894
LPAR2	lysophosphatidic acid receptor 2 [Source:HGNC Symbol;Acc:HGNC:3168]	9170	Q9HBW0	ENSG00000064547	protein_coding	17.0643	0.0200295	0.144785	0.138158	0.890115	0.971518
CTSA	cathepsin A [Source:HGNC Symbol;Acc:HGNC:9251]	5476		ENSG00000064601	protein_coding	1575.58	-0.326905	0.0679771	-4.80843	1.52121e-06	4.17107e-05
SUGP2	SURP and G-patch domain containing 2 [Source:HGNC Symbol;Acc:HGNC:18641]	10147		ENSG00000064607	protein_coding	1472.71	-0.0618479	0.0623255	-0.992323	0.32104	0.67988
SLC12A2	solute carrier family 12 member 2 [Source:HGNC Symbol;Acc:HGNC:10911]	6558	P55011	ENSG00000064651	protein_coding	1019.04	0.164863	0.0668652	2.46573	0.0136735	0.0906447
SNX24	sorting nexin 24 [Source:HGNC Symbol;Acc:HGNC:21533]	28966	Q9Y343	ENSG00000064652	protein_coding	297.812	-0.221227	0.102431	-2.15864	0.030878	0.165955
EYA2	EYA transcriptional coactivator and phosphatase 2 [Source:HGNC Symbol;Acc:HGNC:3520]	2139	O00167	ENSG00000064655	protein_coding	0.152699	-0.00283079	0.0243034	-0.116473	0.907278
CNN2	calponin 2 [Source:HGNC Symbol;Acc:HGNC:2156]	1265	Q99439	ENSG00000064666	protein_coding	1992.19	-0.0231076	0.0529165	-0.436679	0.662344	0.895489
ABCA7	ATP binding cassette subfamily A member 7 [Source:HGNC Symbol;Acc:HGNC:37]	10347		ENSG00000064687	protein_coding	241.297	-0.0595993	0.113374	-0.525585	0.599177	0.867797
SNCAIP	synuclein alpha interacting protein [Source:HGNC Symbol;Acc:HGNC:11139]	9627		ENSG00000064692	protein_coding	0.341796	0.0042845	0.0295105	0.145188	0.884562
DDX20	DEAD-box helicase 20 [Source:HGNC Symbol;Acc:HGNC:2743]	11218	Q9UHI6	ENSG00000064703	protein_coding	762.482	0.0790377	0.0766906	1.03063	0.302713	0.66075
BTBD1	BTB domain containing 1 [Source:HGNC Symbol;Acc:HGNC:1120]	53339	Q9H0C5	ENSG00000064726	protein_coding	2496.63	0.0121984	0.0508318	0.239974	0.810351	0.947622
FAR2	fatty acyl-CoA reductase 2 [Source:HGNC Symbol;Acc:HGNC:25531]	55711		ENSG00000064763	protein_coding	74.7241	-0.0561247	0.150761	-0.372021	0.709877	0.913478
BCAS1	breast carcinoma amplified sequence 1 [Source:HGNC Symbol;Acc:HGNC:974]	8537		ENSG00000064787	protein_coding	20.8481	0.141556	0.151089	0.938246	0.348118	0.705861
POU1F1	POU class 1 homeobox 1 [Source:HGNC Symbol;Acc:HGNC:9210]	5449	P28069	ENSG00000064835	protein_coding	0.318731	0.00407857	0.0287987	0.141626	0.887375
CHI3L2	chitinase 3 like 2 [Source:HGNC Symbol;Acc:HGNC:1933]	1117	Q15782	ENSG00000064886	protein_coding	0.647194	-0.0153755	0.0391961	-0.410951	0.681108
SBNO2	strawberry notch homolog 2 [Source:HGNC Symbol;Acc:HGNC:29158]	22904	Q9Y2G9	ENSG00000064932	protein_coding	1042.26	0.0463094	0.0688725	0.672397	0.501331	0.817497
PMS1	PMS1 homolog 1, mismatch repair system component [Source:HGNC Symbol;Acc:HGNC:9121]	5378	P54277	ENSG00000064933	protein_coding	380.473	0.0998083	0.0940901	1.06089	0.288741	0.648179
HMG20B	high mobility group 20B [Source:HGNC Symbol;Acc:HGNC:5002]	10362		ENSG00000064961	protein_coding	629.434	-0.147869	0.0786719	-1.87929	0.0602043	0.257781
CALCRL	calcitonin receptor like receptor [Source:HGNC Symbol;Acc:HGNC:16709]	10203	Q16602	ENSG00000064989	protein_coding	312.044	-0.49055	0.115737	-4.23405	2.29517e-05	0.000469417
TAF11	TATA-box binding protein associated factor 11 [Source:HGNC Symbol;Acc:HGNC:11544]	6882	Q15544	ENSG00000064995	protein_coding	266.487	0.0155774	0.106129	0.146772	0.883312	0.968617
ANKS1A	ankyrin repeat and sterile alpha motif domain containing 1A [Source:HGNC Symbol;Acc:HGNC:20961]	23294	Q92625	ENSG00000064999	protein_coding	794.369	-0.229593	0.0748505	-3.06674	0.00216406	0.0221635
AP3D1	adaptor related protein complex 3 delta 1 subunit [Source:HGNC Symbol;Acc:HGNC:568]	8943	O14617	ENSG00000065000	protein_coding	3657.67	-0.123168	0.0535188	-2.30136	0.0213712	0.127449
ZNF76	zinc finger protein 76 [Source:HGNC Symbol;Acc:HGNC:13149]	7629		ENSG00000065029	protein_coding	414.637	-0.181402	0.0910688	-1.99136	0.0464409	0.217565
SLC9A3R2	SLC9A3 regulator 2 [Source:HGNC Symbol;Acc:HGNC:11076]	9351		ENSG00000065054	protein_coding	744.154	0.482561	0.0825199	5.8475	4.99023e-09	2.23545e-07
NTHL1	nth like DNA glycosylase 1 [Source:HGNC Symbol;Acc:HGNC:8028]	4913	P78549	ENSG00000065057	protein_coding	374.702	-0.0306755	0.101776	-0.301365	0.763136	0.931421
UHRF1BP1	UHRF1 binding protein 1 [Source:HGNC Symbol;Acc:HGNC:21216]	54887	Q6BDS2	ENSG00000065060	protein_coding	580.252	-0.118741	0.0868804	-1.36649	0.171786	0.489487
GNAI3	G protein subunit alpha i3 [Source:HGNC Symbol;Acc:HGNC:4387]	2773	P08754	ENSG00000065135	protein_coding	4218.97	0.184811	0.0471252	3.92175	8.79098e-05	0.00151155
IPO5	importin 5 [Source:HGNC Symbol;Acc:HGNC:6402]	3843		ENSG00000065150	protein_coding	6638.81	0.203354	0.0453468	4.48445	7.31032e-06	0.000169648
OAT	ornithine aminotransferase [Source:HGNC Symbol;Acc:HGNC:8091]	4942	P04181	ENSG00000065154	protein_coding	3904.76	-0.00241262	0.049438	-0.0488014	0.961078	0.989949
WDR3	WD repeat domain 3 [Source:HGNC Symbol;Acc:HGNC:12755]	10885	Q9UNX4	ENSG00000065183	protein_coding	1557.77	0.188272	0.0583719	3.22553	0.0012574	0.014278
PKN2	protein kinase N2 [Source:HGNC Symbol;Acc:HGNC:9406]	5586		ENSG00000065243	protein_coding	575.205	0.00855834	0.0810687	0.105569	0.915924	0.978605
WDR18	WD repeat domain 18 [Source:HGNC Symbol;Acc:HGNC:17956]	57418	Q9BV38	ENSG00000065268	protein_coding	330.511	0.102642	0.0988472	1.03848	0.299045	0.65741
TRAM2	translocation associated membrane protein 2 [Source:HGNC Symbol;Acc:HGNC:16855]	9697	Q15035	ENSG00000065308	protein_coding	1197.54	0.200073	0.0684831	2.92166	0.00348168	0.0319552
NTN1	netrin 1 [Source:HGNC Symbol;Acc:HGNC:8029]	9423	O95631	ENSG00000065320	protein_coding	5.00319	0.183646	0.0980607	1.92137	0.0546855	0.241671
GLP2R	glucagon like peptide 2 receptor [Source:HGNC Symbol;Acc:HGNC:4325]	9340		ENSG00000065325	protein_coding	15.9771	0.606835	0.142263	4.29245	1.76713e-05	0.000369914
MCM10	minichromosome maintenance 10 replication initiation factor [Source:HGNC Symbol;Acc:HGNC:18043]	55388	Q7L590	ENSG00000065328	protein_coding	848.346	0.174615	0.0733619	2.38033	0.017297	0.108546
DGKA	diacylglycerol kinase alpha [Source:HGNC Symbol;Acc:HGNC:2849]	1606		ENSG00000065357	protein_coding	134.159	0.374842	0.131337	2.85425	0.00431385	0.0380771
ERBB3	erb-b2 receptor tyrosine kinase 3 [Source:HGNC Symbol;Acc:HGNC:3431]	2065		ENSG00000065361	protein_coding	61.308	0.30458	0.15371	1.98247	0.0474263	0.22053
ROPN1	rhophilin associated tail protein 1 [Source:HGNC Symbol;Acc:HGNC:17692]	54763	Q9HAT0	ENSG00000065371	protein_coding	0
ANKRD44	ankyrin repeat domain 44 [Source:HGNC Symbol;Acc:HGNC:25259]	91526		ENSG00000065413	protein_coding	326.371	-0.232529	0.0996149	-2.33311	0.0196421	0.119414
KARS	lysyl-tRNA synthetase [Source:HGNC Symbol;Acc:HGNC:6215]	3735	Q15046	ENSG00000065427	protein_coding	4931.06	0.0297996	0.0491036	0.606874	0.543935	0.841164
ADAT1	adenosine deaminase, tRNA specific 1 [Source:HGNC Symbol;Acc:HGNC:228]	23536		ENSG00000065457	protein_coding	450.774	-0.173124	0.0894304	-1.93542	0.0529394	0.235988
PDIA5	protein disulfide isomerase family A member 5 [Source:HGNC Symbol;Acc:HGNC:24811]	10954	Q14554	ENSG00000065485	protein_coding	1211.68	0.120275	0.066758	1.80174	0.0715864	0.289602
TBC1D22B	TBC1 domain family member 22B [Source:HGNC Symbol;Acc:HGNC:21602]	55633	Q9NU19	ENSG00000065491	protein_coding	249.789	-0.0300099	0.114112	-0.262991	0.792558	0.941132
NDUFB4	NADH:ubiquinone oxidoreductase subunit B4 [Source:HGNC Symbol;Acc:HGNC:7699]	4710	O95168	ENSG00000065518	protein_coding	1072.14	0.089163	0.0686343	1.29918	0.193882	0.523019
SPEN	spen family transcriptional repressor [Source:HGNC Symbol;Acc:HGNC:17575]	23013	Q96T58	ENSG00000065526	protein_coding	375.462	0.0824658	0.0987391	0.835231	0.403587	0.752341
MYLK	myosin light chain kinase [Source:HGNC Symbol;Acc:HGNC:7590]	4638	Q15746	ENSG00000065534	protein_coding	2021.08	-0.0189719	0.0585453	-0.324054	0.745897	0.926668
ZC3H15	zinc finger CCCH-type containing 15 [Source:HGNC Symbol;Acc:HGNC:29528]	55854	Q8WU90	ENSG00000065548	protein_coding	1593.79	0.0859705	0.0616975	1.39344	0.163486	0.4759
MAP2K4	mitogen-activated protein kinase kinase 4 [Source:HGNC Symbol;Acc:HGNC:6844]	6416	P45985	ENSG00000065559	protein_coding	1045.88	0.133978	0.0665669	2.01277	0.0441393	0.210849
TMEM206	transmembrane protein 206 [Source:HGNC Symbol;Acc:HGNC:25593]	55248	Q9H813	ENSG00000065600	protein_coding	503.509	0.122611	0.0906515	1.3527	0.176152	0.49604
SNAP91	synaptosome associated protein 91 [Source:HGNC Symbol;Acc:HGNC:14986]	9892		ENSG00000065609	protein_coding	0.305398	-0.00985477	0.0260662	-0.394137	0.69348
SLK	STE20 like kinase [Source:HGNC Symbol;Acc:HGNC:11088]	9748	Q9H2G2	ENSG00000065613	protein_coding	2559.47	-0.0155215	0.0504443	-0.307696	0.758314	0.929842
CYB5R4	cytochrome b5 reductase 4 [Source:HGNC Symbol;Acc:HGNC:20147]	51167	Q7L1T6	ENSG00000065615	protein_coding	625.699	0.168021	0.0865261	1.94195	0.0521428	0.234075
COL17A1	collagen type XVII alpha 1 chain [Source:HGNC Symbol;Acc:HGNC:2194]	1308	Q9UMD9	ENSG00000065618	protein_coding	7.021	0.0944841	0.115077	0.820765	0.41178	0.759711
GSTO2	glutathione S-transferase omega 2 [Source:HGNC Symbol;Acc:HGNC:23064]	119391	Q9H4Y5	ENSG00000065621	protein_coding	20.8689	-0.00777824	0.151532	-0.0513294	0.959063	0.989522
SEC61A2	Sec61 translocon alpha 2 subunit [Source:HGNC Symbol;Acc:HGNC:17702]	55176		ENSG00000065665	protein_coding	161.706	-0.0705793	0.126496	-0.557928	0.576893	0.856443
PRKCQ	protein kinase C theta [Source:HGNC Symbol;Acc:HGNC:9410]	5588	Q04759	ENSG00000065675	protein_coding	81.3715	-0.0825103	0.150933	-0.546208	0.584923	0.86023
TLE2	transducin like enhancer of split 2 [Source:HGNC Symbol;Acc:HGNC:11838]	7089	Q04725	ENSG00000065717	protein_coding	5.58395	0.0687136	0.105612	0.652239	0.514247	0.823369
ASB1	ankyrin repeat and SOCS box containing 1 [Source:HGNC Symbol;Acc:HGNC:16011]	51665	Q9Y576	ENSG00000065802	protein_coding	622.973	-0.11579	0.081609	-1.41873	0.155978	0.464422
FAM107B	family with sequence similarity 107 member B [Source:HGNC Symbol;Acc:HGNC:23726]	83641	Q9H098	ENSG00000065809	protein_coding	1504.67	0.00154027	0.0588888	0.0261553	0.979133	0.99456
ME1	malic enzyme 1 [Source:HGNC Symbol;Acc:HGNC:6983]	4199	P48163	ENSG00000065833	protein_coding	328.369	0.0142208	0.102972	0.138109	0.890154	0.971518
TBC1D1	TBC1 domain family member 1 [Source:HGNC Symbol;Acc:HGNC:11578]	23216	Q86TI0	ENSG00000065882	protein_coding	1568.7	-0.0388526	0.058741	-0.661413	0.508347	0.820914
CDK13	cyclin dependent kinase 13 [Source:HGNC Symbol;Acc:HGNC:1733]	8621	Q14004	ENSG00000065883	protein_coding	2101.75	-0.0164151	0.0552578	-0.297065	0.766417	0.932981
MTHFD2	methylenetetrahydrofolate dehydrogenase (NADP+ dependent) 2, methenyltetrahydrofolate cyclohydrolase [Source:HGNC Symbol;Acc:HGNC:7434]	10797	P13995	ENSG00000065911	protein_coding	2065.97	0.547179	0.0653808	8.36881	5.82041e-17	8.86777e-15
SLC9A7	solute carrier family 9 member A7 [Source:HGNC Symbol;Acc:HGNC:17123]	84679	Q96T83	ENSG00000065923	protein_coding	362.906	0.021058	0.101183	0.208113	0.83514	0.954007
FOXJ2	forkhead box J2 [Source:HGNC Symbol;Acc:HGNC:24818]	55810	Q9P0K8	ENSG00000065970	protein_coding	170.354	-0.136916	0.135678	-1.00886	0.31304	0.672319
YBX1	Y-box binding protein 1 [Source:HGNC Symbol;Acc:HGNC:8014]	4904	P67809	ENSG00000065978	protein_coding	15523.7	0.131122	0.0437249	2.99881	0.0027104	0.0264562
PDE4A	phosphodiesterase 4A [Source:HGNC Symbol;Acc:HGNC:8780]	5141	P27815	ENSG00000065989	protein_coding	51.9072	-0.0196078	0.155989	-0.125685	0.899981	0.974105
PPP2R5A	protein phosphatase 2 regulatory subunit B'alpha [Source:HGNC Symbol;Acc:HGNC:9309]	5525	Q15172	ENSG00000066027	protein_coding	1042.86	0.0994714	0.0694051	1.43322	0.151796	0.457136
CTNNA2	catenin alpha 2 [Source:HGNC Symbol;Acc:HGNC:2510]	1496	P26232	ENSG00000066032	protein_coding	64.6299	-0.484954	0.15449	-3.12564	0.00177416	0.0188394
ELAVL1	ELAV like RNA binding protein 1 [Source:HGNC Symbol;Acc:HGNC:3312]	1994	Q15717	ENSG00000066044	protein_coding	1623.15	0.0567694	0.0567593	1.00019	0.317219	0.675804
TIE1	tyrosine kinase with immunoglobulin like and EGF like domains 1 [Source:HGNC Symbol;Acc:HGNC:11809]	7075	P35590	ENSG00000066056	protein_coding	13.8085	0.0114577	0.137277	0.0837182	0.93328	0.983596
DIP2B	disco interacting protein 2 homolog B [Source:HGNC Symbol;Acc:HGNC:29284]	57609	Q9P265	ENSG00000066084	protein_coding	1764.61	-0.181259	0.0637302	-2.84401	0.004455	0.039044
SMARCD1	SWI/SNF related, matrix associated, actin dependent regulator of chromatin, subfamily d, member 1 [Source:HGNC Symbol;Acc:HGNC:11106]	6602	Q96GM5	ENSG00000066117	protein_coding	790.154	-0.0659629	0.0731489	-0.901721	0.367205	0.722169
KDM4A	lysine demethylase 4A [Source:HGNC Symbol;Acc:HGNC:22978]	9682	O75164	ENSG00000066135	protein_coding	1347.53	-0.0424685	0.0602428	-0.704947	0.480844	0.80559
NFYC	nuclear transcription factor Y subunit gamma [Source:HGNC Symbol;Acc:HGNC:7806]	4802	Q13952	ENSG00000066136	protein_coding	499.659	-0.0716448	0.0999136	-0.716973	0.473391	0.799988
ZMYND12	zinc finger MYND-type containing 12 [Source:HGNC Symbol;Acc:HGNC:21192]	84217	Q9H0C1	ENSG00000066185	protein_coding	3.79155	-0.049456	0.0919442	-0.539967	0.58922
SLC9A3	solute carrier family 9 member A3 [Source:HGNC Symbol;Acc:HGNC:11073]	6550		ENSG00000066230	protein_coding	178.647	0.100958	0.120385	0.83875	0.401609	0.751292
NGEF	neuronal guanine nucleotide exchange factor [Source:HGNC Symbol;Acc:HGNC:7807]	25791	Q8N5V2	ENSG00000066248	protein_coding	8.75184	0.340333	0.120042	2.89407	0.00380282	0.0343627
ASPM	abnormal spindle microtubule assembly [Source:HGNC Symbol;Acc:HGNC:19048]	259266	Q8IZT6	ENSG00000066279	protein_coding	5397.38	0.0873827	0.0550416	1.58759	0.11238	0.382331
CD84	CD84 molecule [Source:HGNC Symbol;Acc:HGNC:1704]	8832	Q9UIB8	ENSG00000066294	protein_coding	1.55846	0.0292072	0.0614734	0.479357	0.631685
ELOVL1	ELOVL fatty acid elongase 1 [Source:HGNC Symbol;Acc:HGNC:14418]	64834	Q9BW60	ENSG00000066322	protein_coding	1013.88	-0.112191	0.0740569	-1.51485	0.12981	0.417608
SPI1	Spi-1 proto-oncogene [Source:HGNC Symbol;Acc:HGNC:11241]	6688	P17947	ENSG00000066336	protein_coding	0.200205	0.00862596	0.0243034	0.354932	0.722641
ZNRD1	zinc ribbon domain containing 1 [Source:HGNC Symbol;Acc:HGNC:13182]	30834	Q9P1U0	ENSG00000066379	protein_coding	246.089	0.208371	0.111429	1.87058	0.061403	0.261571
MPPED2	metallophosphoesterase domain containing 2 [Source:HGNC Symbol;Acc:HGNC:1180]	744	Q15777	ENSG00000066382	protein_coding	0
CLDN18	claudin 18 [Source:HGNC Symbol;Acc:HGNC:2039]	51208	P56856	ENSG00000066405	protein_coding	29.7485	0.22157	0.156685	1.4148	0.157126	0.46546
ZBTB11	zinc finger and BTB domain containing 11 [Source:HGNC Symbol;Acc:HGNC:16740]	27107	O95625	ENSG00000066422	protein_coding	987.128	0.118186	0.0701627	1.68451	0.0920841	0.337462
ATXN3	ataxin 3 [Source:HGNC Symbol;Acc:HGNC:7106]	4287		ENSG00000066427	protein_coding	506.793	-0.00174671	0.0859037	-0.0203332	0.983778	0.995539
GOLGA5	golgin A5 [Source:HGNC Symbol;Acc:HGNC:4428]	9950	Q8TBA6	ENSG00000066455	protein_coding	1127.67	-0.0567788	0.0657809	-0.863116	0.388074	0.739688
FGFR2	fibroblast growth factor receptor 2 [Source:HGNC Symbol;Acc:HGNC:3689]	2263	P21802	ENSG00000066468	protein_coding	0.4059	-0.0217471	0.0313676	-0.623855	0.532723
LRRC40	leucine rich repeat containing 40 [Source:HGNC Symbol;Acc:HGNC:26004]	55631	Q9H9A6	ENSG00000066557	protein_coding	897.922	0.104859	0.0689405	1.52107	0.128242	0.414356
ISOC1	isochorismatase domain containing 1 [Source:HGNC Symbol;Acc:HGNC:24254]	51015		ENSG00000066583	protein_coding	638.425	0.152142	0.0793055	1.91853	0.0550444	0.242198
EML1	echinoderm microtubule associated protein like 1 [Source:HGNC Symbol;Acc:HGNC:3330]	2009		ENSG00000066629	protein_coding	426.763	0.105431	0.0894585	1.17866	0.238533	0.58762
TRMT11	tRNA methyltransferase 11 homolog [Source:HGNC Symbol;Acc:HGNC:21080]	60487	Q7Z4G4	ENSG00000066651	protein_coding	322.373	0.0850139	0.104422	0.814174	0.415546	0.762402
THUMPD1	THUMP domain containing 1 [Source:HGNC Symbol;Acc:HGNC:23807]	55623	Q9NXG2	ENSG00000066654	protein_coding	2249.18	0.00863502	0.0530579	0.162747	0.870717	0.964355
MSANTD3	Myb/SANT DNA binding domain containing 3 [Source:HGNC Symbol;Acc:HGNC:23370]	91283	Q96H12	ENSG00000066697	protein_coding	1065.98	-0.00570245	0.0671463	-0.0849263	0.93232	0.983218
KIF26A	kinesin family member 26A [Source:HGNC Symbol;Acc:HGNC:20226]	26153	Q9ULI4	ENSG00000066735	protein_coding	18.4533	0.547404	0.146168	3.76227	0.000168378	0.0026578
ATG2B	autophagy related 2B [Source:HGNC Symbol;Acc:HGNC:20187]	55102	Q96BY7	ENSG00000066739	protein_coding	965.638	-0.158927	0.0700659	-2.26802	0.0233277	0.135294
ARFGEF1	ADP ribosylation factor guanine nucleotide exchange factor 1 [Source:HGNC Symbol;Acc:HGNC:15772]	10565		ENSG00000066777	protein_coding	3005.54	-0.0090544	0.0472663	-0.191561	0.848086	0.957923
ACSM2B	acyl-CoA synthetase medium chain family member 2B [Source:HGNC Symbol;Acc:HGNC:30931]	348158	Q68CK6	ENSG00000066813	protein_coding	0.965051	-0.0119412	0.0485723	-0.248458	0.80378
ZFAT	zinc finger and AT-hook domain containing [Source:HGNC Symbol;Acc:HGNC:19899]	57623		ENSG00000066827	protein_coding	322.583	0.0312507	0.106026	0.29476	0.768177	0.933232
MTFR1	mitochondrial fission regulator 1 [Source:HGNC Symbol;Acc:HGNC:29510]	9650		ENSG00000066855	protein_coding	1198.95	0.00196493	0.0646023	0.0304158	0.975735	0.993961
STAG3	stromal antigen 3 [Source:HGNC Symbol;Acc:HGNC:11356]	10734	Q9UJ98	ENSG00000066923	protein_coding	10.741	-0.184275	0.124674	-1.4977	0.13421	0.426305
FECH	ferrochelatase [Source:HGNC Symbol;Acc:HGNC:3647]	2235	P22830	ENSG00000066926	protein_coding	972.061	0.0449278	0.0676052	0.664567	0.506328	0.819309
MYO9A	myosin IXA [Source:HGNC Symbol;Acc:HGNC:7608]	4649	B2RTY4	ENSG00000066933	protein_coding	1400.98	-0.237427	0.0599831	-3.95776	7.56549e-05	0.00132954
DDX3Y	DEAD-box helicase 3, Y-linked [Source:HGNC Symbol;Acc:HGNC:2699]	8653	O15523	ENSG00000067048	protein_coding	0.900948	0.0217018	0.0446045	0.49721	0.619041
PFKP	phosphofructokinase, platelet [Source:HGNC Symbol;Acc:HGNC:8878]	5214		ENSG00000067057	protein_coding	6652.64	0.137574	0.0466528	2.94891	0.00318898	0.0299272
IDI1	isopentenyl-diphosphate delta isomerase 1 [Source:HGNC Symbol;Acc:HGNC:5387]	3422		ENSG00000067064	protein_coding	1922	0.0468145	0.0564429	0.82942	0.406867	0.75532
SP100	SP100 nuclear antigen [Source:HGNC Symbol;Acc:HGNC:11206]	6672	P23497	ENSG00000067066	protein_coding	1187.93	0.0671681	0.064599	1.0398	0.298435	0.65673
KLF6	Kruppel like factor 6 [Source:HGNC Symbol;Acc:HGNC:2235]	1316	Q99612	ENSG00000067082	protein_coding	1378.56	0.00326548	0.0862724	0.0378503	0.969807	0.99186
PLPP1	phospholipid phosphatase 1 [Source:HGNC Symbol;Acc:HGNC:9228]	8611	O14494	ENSG00000067113	protein_coding	3453.51	0.351158	0.0500569	7.01524	2.29548e-12	1.80355e-10
NEO1	neogenin 1 [Source:HGNC Symbol;Acc:HGNC:7754]	4756	Q92859	ENSG00000067141	protein_coding	331.292	-0.149293	0.100839	-1.48005	0.13886	0.434459
TRAM1	translocation associated membrane protein 1 [Source:HGNC Symbol;Acc:HGNC:20568]	23471		ENSG00000067167	protein_coding	13195.9	0.0573799	0.0418319	1.37168	0.170163	0.487525
PHKA1	phosphorylase kinase regulatory subunit alpha 1 [Source:HGNC Symbol;Acc:HGNC:8925]	5255	P46020	ENSG00000067177	protein_coding	345.326	-0.0420349	0.0978802	-0.429445	0.667599	0.896872
TNFRSF1A	TNF receptor superfamily member 1A [Source:HGNC Symbol;Acc:HGNC:11916]	7132		ENSG00000067182	protein_coding	913.223	-0.0621061	0.0707568	-0.8777	0.380107	0.73306
CACNB1	calcium voltage-gated channel auxiliary subunit beta 1 [Source:HGNC Symbol;Acc:HGNC:1401]	782	Q02641	ENSG00000067191	protein_coding	70.6161	-0.00238151	0.153651	-0.0154983	0.987635	0.996844
EVI5	ecotropic viral integration site 5 [Source:HGNC Symbol;Acc:HGNC:3501]	7813	O60447	ENSG00000067208	protein_coding	487.247	0.026384	0.0890369	0.296324	0.766983	0.933151
STOML1	stomatin like 1 [Source:HGNC Symbol;Acc:HGNC:14560]	9399	Q9UBI4	ENSG00000067221	protein_coding	189.713	-0.270094	0.1227	-2.19953	0.0278404	0.153249
PKM	pyruvate kinase M1/2 [Source:HGNC Symbol;Acc:HGNC:9021]	5315	P14618	ENSG00000067225	protein_coding	60687.5	-0.0944405	0.0437761	-2.15735	0.0309785	0.166301
DHX29	DExH-box helicase 29 [Source:HGNC Symbol;Acc:HGNC:15815]	54505	Q7Z478	ENSG00000067248	protein_coding	896.76	0.023508	0.0733061	0.320685	0.748449	0.927449
DNTTIP2	deoxynucleotidyltransferase terminal interacting protein 2 [Source:HGNC Symbol;Acc:HGNC:24013]	30836	Q5QJE6	ENSG00000067334	protein_coding	929.113	0.14044	0.0753519	1.86387	0.06234	0.263958
METTL22	methyltransferase like 22 [Source:HGNC Symbol;Acc:HGNC:28368]			ENSG00000067365	protein_coding	273.276	-0.0946269	0.112404	-0.841859	0.399867	0.749256
TP53BP1	tumor protein p53 binding protein 1 [Source:HGNC Symbol;Acc:HGNC:11999]	7158	Q12888	ENSG00000067369	protein_coding	3352.28	-0.00961931	0.0463323	-0.207616	0.835529	0.95426
TRO	trophinin [Source:HGNC Symbol;Acc:HGNC:12326]	7216		ENSG00000067445	protein_coding	766.958	0.0478639	0.0804262	0.595146	0.551746	0.84538
RRP15	ribosomal RNA processing 15 homolog [Source:HGNC Symbol;Acc:HGNC:24255]	51018	Q9Y3B9	ENSG00000067533	protein_coding	933.868	0.189259	0.0674382	2.80658	0.00500697	0.0425654
RHOA	ras homolog family member A [Source:HGNC Symbol;Acc:HGNC:667]	387	P61586	ENSG00000067560	protein_coding	6693.44	0.113574	0.0457015	2.48513	0.0129503	0.0866702
DHX8	DEAH-box helicase 8 [Source:HGNC Symbol;Acc:HGNC:2749]	1659		ENSG00000067596	protein_coding	1685.89	0.0760615	0.0612375	1.24209	0.214202	0.553137
				ENSG00000067601		28.9818	0.0684818	0.156274	0.438578	0.660967	0.894755
PRKCZ	protein kinase C zeta [Source:HGNC Symbol;Acc:HGNC:9412]	5590	Q05513	ENSG00000067606	protein_coding	317.58	0.0321682	0.106765	0.301298	0.763188	0.931421
ZFY	zinc finger protein, Y-linked [Source:HGNC Symbol;Acc:HGNC:12870]	7544	P08048	ENSG00000067646	protein_coding	0
IARS2	isoleucyl-tRNA synthetase 2, mitochondrial [Source:HGNC Symbol;Acc:HGNC:29685]	55699	Q9NSE4	ENSG00000067704	protein_coding	5266.57	-0.110246	0.0429883	-2.56453	0.0103315	0.0737045
SYT1	synaptotagmin 1 [Source:HGNC Symbol;Acc:HGNC:11509]	6857	P21579	ENSG00000067715	protein_coding	33.4989	0.36633	0.156611	2.33948	0.0193107	0.118095
NAV3	neuron navigator 3 [Source:HGNC Symbol;Acc:HGNC:15998]	89795		ENSG00000067798	protein_coding	1212.81	-0.142139	0.0782913	-1.81546	0.0694525	0.283655
IDH3G	isocitrate dehydrogenase 3 (NAD(+)) gamma [Source:HGNC Symbol;Acc:HGNC:5386]	3421	P51553	ENSG00000067829	protein_coding	639.348	-0.130367	0.0792599	-1.64455	0.100062	0.356339
ROGDI	rogdi homolog [Source:HGNC Symbol;Acc:HGNC:29478]	79641	Q9GZN7	ENSG00000067836	protein_coding	188.738	-0.207715	0.130433	-1.59141	0.111517	0.380214
PDZD4	PDZ domain containing 4 [Source:HGNC Symbol;Acc:HGNC:21167]	57595	Q76G19	ENSG00000067840	protein_coding	24.9515	0.824444	0.152002	5.40917	6.3316e-08	2.29681e-06
ATP2B3	ATPase plasma membrane Ca2+ transporting 3 [Source:HGNC Symbol;Acc:HGNC:816]	492	Q16720	ENSG00000067842	protein_coding	0.328758	0.00416899	0.0291134	0.143201	0.886132
ROCK1	Rho associated coiled-coil containing protein kinase 1 [Source:HGNC Symbol;Acc:HGNC:10251]	6093	Q13464	ENSG00000067900	protein_coding	1443.37	0.117558	0.0642031	1.83106	0.0670922	0.276659
CBFB	core-binding factor beta subunit [Source:HGNC Symbol;Acc:HGNC:1539]	865		ENSG00000067955	protein_coding	2313.44	0.166872	0.0510063	3.27165	0.00106922	0.0125478
PDK3	pyruvate dehydrogenase kinase 3 [Source:HGNC Symbol;Acc:HGNC:8811]	5165	Q15120	ENSG00000067992	protein_coding	21	0.119432	0.150318	0.795938	0.426068	0.770158
HYAL2	hyaluronoglucosaminidase 2 [Source:HGNC Symbol;Acc:HGNC:5321]	8692	Q12891	ENSG00000068001	protein_coding	366.433	-0.0281705	0.097526	-0.288838	0.772705	0.934596
HDAC4	histone deacetylase 4 [Source:HGNC Symbol;Acc:HGNC:14063]	9759	P56524	ENSG00000068024	protein_coding	418.302	0.298996	0.102098	2.92841	0.00340701	0.0314345
RASSF1	Ras association domain family member 1 [Source:HGNC Symbol;Acc:HGNC:9882]	11186	Q9NS23	ENSG00000068028	protein_coding	204.28	-0.0744196	0.119127	-0.624508	0.532294	0.83462
FGFR3	fibroblast growth factor receptor 3 [Source:HGNC Symbol;Acc:HGNC:3690]	2261	P22607	ENSG00000068078	protein_coding	1487.23	0.0991014	0.0614368	1.61308	0.106727	0.370436
IFI35	interferon induced protein 35 [Source:HGNC Symbol;Acc:HGNC:5399]	3430	P80217	ENSG00000068079	protein_coding	662.053	0.0437778	0.0779421	0.561701	0.57432	0.855894
HEATR6	HEAT repeat containing 6 [Source:HGNC Symbol;Acc:HGNC:24076]	63897	Q6AI08	ENSG00000068097	protein_coding	621.755	0.0399384	0.0792576	0.503924	0.614315	0.875216
COASY	Coenzyme A synthase [Source:HGNC Symbol;Acc:HGNC:29932]	80347		ENSG00000068120	protein_coding	373.071	-0.258928	0.100989	-2.56257	0.01039	0.0740317
PLEKHH3	pleckstrin homology, MyTH4 and FERM domain containing H3 [Source:HGNC Symbol;Acc:HGNC:26105]	79990	Q7Z736	ENSG00000068137	protein_coding	262.178	0.163575	0.114843	1.42428	0.154364	0.461624
MEF2A	myocyte enhancer factor 2A [Source:HGNC Symbol;Acc:HGNC:6993]	4205		ENSG00000068305	protein_coding	506.404	-0.107162	0.0925585	-1.15756	0.247042	0.597272
OTUD5	OTU deubiquitinase 5 [Source:HGNC Symbol;Acc:HGNC:25402]	55593		ENSG00000068308	protein_coding	1714.19	-0.0351991	0.0574094	-0.61312	0.539797	0.839711
TFE3	transcription factor binding to IGHM enhancer 3 [Source:HGNC Symbol;Acc:HGNC:11752]	7030	P19532	ENSG00000068323	protein_coding	502.274	-0.153297	0.0951946	-1.61016	0.107363	0.372182
TBC1D25	TBC1 domain family member 25 [Source:HGNC Symbol;Acc:HGNC:8092]	4943	Q3MII6	ENSG00000068354	protein_coding	180.214	-0.210096	0.126741	-1.65636	0.097649	0.350322
ACSL4	acyl-CoA synthetase long chain family member 4 [Source:HGNC Symbol;Acc:HGNC:3571]	2182	O60488	ENSG00000068366	protein_coding	2536.76	0.0239399	0.0503744	0.475241	0.634615	0.884503
INPP5A	inositol polyphosphate-5-phosphatase A [Source:HGNC Symbol;Acc:HGNC:6076]	3632	Q14642	ENSG00000068383	protein_coding	357.038	-0.027581	0.0965533	-0.285651	0.775146	0.935654
GPKOW	G-patch domain and KOW motifs [Source:HGNC Symbol;Acc:HGNC:30677]	27238	Q92917	ENSG00000068394	protein_coding	1032.61	0.0198798	0.0697233	0.285125	0.775548	0.93571
GRIPAP1	GRIP1 associated protein 1 [Source:HGNC Symbol;Acc:HGNC:18706]	56850		ENSG00000068400	protein_coding	808.71	-0.127345	0.072307	-1.76101	0.0782374	0.306187
FTSJ1	FtsJ RNA methyltransferase homolog 1 [Source:HGNC Symbol;Acc:HGNC:13254]	24140	Q9UET6	ENSG00000068438	protein_coding	4644.94	0.174109	0.0471039	3.69632	0.000218747	0.00329834
PRR11	proline rich 11 [Source:HGNC Symbol;Acc:HGNC:25619]	55771	Q96HE9	ENSG00000068489	protein_coding	1455.63	-0.0912408	0.0767477	-1.18878	0.234526	0.581782
REEP1	receptor accessory protein 1 [Source:HGNC Symbol;Acc:HGNC:25786]	65055	Q9H902	ENSG00000068615	protein_coding	2.96835	-0.010937	0.0820022	-0.134156	0.893279
ATP11A	ATPase phospholipid transporting 11A [Source:HGNC Symbol;Acc:HGNC:13552]	23250	P98196	ENSG00000068650	protein_coding	486.991	0.17445	0.091017	1.9167	0.0552763	0.243053
POLR1A	RNA polymerase I subunit A [Source:HGNC Symbol;Acc:HGNC:17264]	25885	O95602	ENSG00000068654	protein_coding	1269.13	0.118207	0.065293	1.81044	0.0702282	0.285905
LAPTM4A	lysosomal protein transmembrane 4 alpha [Source:HGNC Symbol;Acc:HGNC:6924]	9741	Q15012	ENSG00000068697	protein_coding	1786.13	-0.0270412	0.0639977	-0.42254	0.672631	0.898449
TTC7A	tetratricopeptide repeat domain 7A [Source:HGNC Symbol;Acc:HGNC:19750]	57217		ENSG00000068724	protein_coding	477.318	0.105967	0.0928153	1.14182	0.253528	0.604279
IP6K2	inositol hexakisphosphate kinase 2 [Source:HGNC Symbol;Acc:HGNC:17313]	51447	Q9UHH9	ENSG00000068745	protein_coding	1037.09	0.0225797	0.0690975	0.326782	0.743833	0.926012
STON1-GTF2A1L	STON1-GTF2A1L readthrough [Source:HGNC Symbol;Acc:HGNC:30651]	286749		ENSG00000068781	protein_coding	0
SRBD1	S1 RNA binding domain 1 [Source:HGNC Symbol;Acc:HGNC:25521]	55133	Q8N5C6	ENSG00000068784	protein_coding	594.816	0.0179586	0.083645	0.214695	0.830005	0.952484
KIF2A	kinesin family member 2A [Source:HGNC Symbol;Acc:HGNC:6318]	3796	O00139	ENSG00000068796	protein_coding	782.162	0.191707	0.0746056	2.5698	0.0101757	0.0728634
RASGRP2	RAS guanyl releasing protein 2 [Source:HGNC Symbol;Acc:HGNC:9879]	10235	Q7LDG7	ENSG00000068831	protein_coding	10.049	0.210655	0.12924	1.63684	0.101664	0.359278
PSME4	proteasome activator subunit 4 [Source:HGNC Symbol;Acc:HGNC:20635]	23198	Q14997	ENSG00000068878	protein_coding	1542.27	0.220454	0.0625289	3.52578	0.000422241	0.00577525
IFT80	intraflagellar transport 80 [Source:HGNC Symbol;Acc:HGNC:29262]	57560	Q9P2H3	ENSG00000068885	protein_coding	335.073	-0.0899869	0.0998147	-0.901418	0.367366	0.722405
SIRT2	sirtuin 2 [Source:HGNC Symbol;Acc:HGNC:10886]	22933	Q8IXJ6	ENSG00000068903	protein_coding	790.901	-0.175864	0.077353	-2.27325	0.0230109	0.134346
ERLEC1	endoplasmic reticulum lectin 1 [Source:HGNC Symbol;Acc:HGNC:25222]	27248	Q96DZ1	ENSG00000068912	protein_coding	2196.86	-0.0867916	0.0536568	-1.61751	0.105768	0.369008
PPP2R5B	protein phosphatase 2 regulatory subunit B'beta [Source:HGNC Symbol;Acc:HGNC:9310]	5526		ENSG00000068971	protein_coding	142.269	-0.134928	0.129802	-1.03903	0.298792	0.657185
PYGM	glycogen phosphorylase, muscle associated [Source:HGNC Symbol;Acc:HGNC:9726]	5837	P11217	ENSG00000068976	protein_coding	3.81354	0.0156425	0.0870531	0.17817	0.858589
PAGE1	PAGE family member 1 [Source:HGNC Symbol;Acc:HGNC:4107]	8712	O75459	ENSG00000068985	protein_coding	0
PITX1	paired like homeodomain 1 [Source:HGNC Symbol;Acc:HGNC:9004]	5307	P78337	ENSG00000069011	protein_coding	271.186	0.513897	0.115183	4.46049	8.17712e-06	0.000187774
TRPC7	transient receptor potential cation channel subfamily C member 7 [Source:HGNC Symbol;Acc:HGNC:20754]	57113	Q9HCX4	ENSG00000069018	protein_coding	75.5938	-0.360703	0.14893	-2.41539	0.0157185	0.10088
MAST4	microtubule associated serine/threonine kinase family member 4 [Source:HGNC Symbol;Acc:HGNC:19037]	375449		ENSG00000069020	protein_coding	0.860783	0.0468324	0.038787	1.35302	0.176051
ADGRF5	adhesion G protein-coupled receptor F5 [Source:HGNC Symbol;Acc:HGNC:19030]	221395	Q8IZF2	ENSG00000069122	protein_coding	12.1655	-0.132444	0.133811	-0.992348	0.321028	0.67988
SDK2	sidekick cell adhesion molecule 2 [Source:HGNC Symbol;Acc:HGNC:19308]	54549	Q58EX2	ENSG00000069188	protein_coding	1.97667	0.0590934	0.0658956	0.916644	0.359329
ADAM7	ADAM metallopeptidase domain 7 [Source:HGNC Symbol;Acc:HGNC:214]	8756	Q9H2U9	ENSG00000069206	protein_coding	0.553108	0.0156079	0.034654	0.496407	0.619607
NUP133	nucleoporin 133 [Source:HGNC Symbol;Acc:HGNC:18016]	55746	Q8WUM0	ENSG00000069248	protein_coding	2830.8	0.00590147	0.0495445	0.119115	0.905184	0.975084
NUCKS1	nuclear casein kinase and cyclin dependent kinase substrate 1 [Source:HGNC Symbol;Acc:HGNC:29923]	64710	Q9H1E3	ENSG00000069275	protein_coding	18650.1	0.067498	0.036305	1.85919	0.0629999	0.265641
VPS35	VPS35, retromer complex component [Source:HGNC Symbol;Acc:HGNC:13487]	55737	Q96QK1	ENSG00000069329	protein_coding	6448.66	-0.0409293	0.0429544	-0.952855	0.340664	0.698428
DNAJA2	DnaJ heat shock protein family (Hsp40) member A2 [Source:HGNC Symbol;Acc:HGNC:14884]	10294	O60884	ENSG00000069345	protein_coding	3276.61	0.141278	0.0547487	2.5805	0.00986578	0.0711644
BCL3	B cell CLL/lymphoma 3 [Source:HGNC Symbol;Acc:HGNC:998]	602	P20749	ENSG00000069399	protein_coding	23.1038	0.145553	0.152279	0.957649	0.33824	0.695708
KCNAB2	potassium voltage-gated channel subfamily A regulatory beta subunit 2 [Source:HGNC Symbol;Acc:HGNC:6229]	8514		ENSG00000069424	protein_coding	75.0986	0.221154	0.151433	1.45989	0.144321	0.445108
ABCC9	ATP binding cassette subfamily C member 9 [Source:HGNC Symbol;Acc:HGNC:60]	10060	O60706	ENSG00000069431	protein_coding	19.6468	-0.255282	0.148441	-1.71959	0.0855079	0.322597
GAL	galanin and GMAP prepropeptide [Source:HGNC Symbol;Acc:HGNC:4114]	51083	P22466	ENSG00000069482	protein_coding	0
CLEC2D	C-type lectin domain family 2 member D [Source:HGNC Symbol;Acc:HGNC:14351]	29121		ENSG00000069493	protein_coding	41.5877	-0.162862	0.157632	-1.03191	0.302113	0.660262
FUNDC1	FUN14 domain containing 1 [Source:HGNC Symbol;Acc:HGNC:28746]	139341	Q8IVP5	ENSG00000069509	protein_coding	253.82	0.073918	0.109896	0.672732	0.501118	0.817467
MAOB	monoamine oxidase B [Source:HGNC Symbol;Acc:HGNC:6834]	4129	P27338	ENSG00000069535	protein_coding	0
RORA	RAR related orphan receptor A [Source:HGNC Symbol;Acc:HGNC:10258]	6095	P35398	ENSG00000069667	protein_coding	8.14714	0.105703	0.115522	0.921278	0.356906	0.713038
DRD4	dopamine receptor D4 [Source:HGNC Symbol;Acc:HGNC:3025]	1815	P21917	ENSG00000069696	protein_coding	3.82689	0.0934069	0.0911083	1.03383	0.301214
TGFBR3	transforming growth factor beta receptor 3 [Source:HGNC Symbol;Acc:HGNC:11774]	7049		ENSG00000069702	protein_coding	185.973	1.187	0.125474	9.40941	4.98918e-21	1.06604e-18
				ENSG00000069712		0
PLA2G10	phospholipase A2 group X [Source:HGNC Symbol;Acc:HGNC:9029]	8399	O15496	ENSG00000069764	protein_coding	1.18054	0.0213489	0.0499651	0.430144	0.667091
HES2	hes family bHLH transcription factor 2 [Source:HGNC Symbol;Acc:HGNC:16005]	54626	Q9Y543	ENSG00000069812	protein_coding	17.4063	0.505722	0.142976	3.57405	0.000351504	0.00495471
ATP1B3	ATPase Na+/K+ transporting subunit beta 3 [Source:HGNC Symbol;Acc:HGNC:806]	483		ENSG00000069849	protein_coding	1041.61	0.0670905	0.067576	0.992835	0.32079	0.679797
NEDD4	neural precursor cell expressed, developmentally down-regulated 4, E3 ubiquitin protein ligase [Source:HGNC Symbol;Acc:HGNC:7727]	4734		ENSG00000069869	protein_coding	3879.1	0.193145	0.0488354	3.95507	7.65111e-05	0.00133991
PIGB	phosphatidylinositol glycan anchor biosynthesis class B [Source:HGNC Symbol;Acc:HGNC:8959]	9488		ENSG00000069943	protein_coding	250.585	-0.0721023	0.109314	-0.659539	0.50955	0.821072
MAPK6	mitogen-activated protein kinase 6 [Source:HGNC Symbol;Acc:HGNC:6879]	5597	Q16659	ENSG00000069956	protein_coding	3529.63	0.00215564	0.0455764	0.0472969	0.962277	0.99007
GNB5	G protein subunit beta 5 [Source:HGNC Symbol;Acc:HGNC:4401]	10681	O14775	ENSG00000069966	protein_coding	543.776	0.202016	0.0851297	2.3732	0.0176346	0.110191
RAB27A	RAB27A, member RAS oncogene family [Source:HGNC Symbol;Acc:HGNC:9766]	5873	P51159	ENSG00000069974	protein_coding	134.563	0.0406311	0.134839	0.301284	0.763198	0.931421
HDHD5	haloacid dehalogenase like hydrolase domain containing 5 [Source:HGNC Symbol;Acc:HGNC:1843]	27440	Q9BXW7	ENSG00000069998	protein_coding	442.878	-0.0237492	0.0929643	-0.255475	0.798356	0.943605
UFD1	ubiquitin recognition factor in ER associated degradation 1 [Source:HGNC Symbol;Acc:HGNC:12520]	7353	Q92890	ENSG00000070010	protein_coding	600.671	-0.00333736	0.0816971	-0.0408497	0.967416	0.991241
LRP6	LDL receptor related protein 6 [Source:HGNC Symbol;Acc:HGNC:6698]	4040	O75581	ENSG00000070018	protein_coding	4059.48	-0.100228	0.0513603	-1.95144	0.0510046	0.230739
GUCY2C	guanylate cyclase 2C [Source:HGNC Symbol;Acc:HGNC:4688]	2984	P25092	ENSG00000070019	protein_coding	1.59732	0.000932634	0.0578079	0.0161058	0.98715
SCT	secretin [Source:HGNC Symbol;Acc:HGNC:10607]	6343	P09683	ENSG00000070031	protein_coding	2.86656	0.0477975	0.0816773	0.585882	0.557955
PHRF1	PHD and ring finger domains 1 [Source:HGNC Symbol;Acc:HGNC:24351]	57661	Q9P1Y6	ENSG00000070047	protein_coding	1747.16	0.030048	0.0624136	0.481436	0.630206	0.882418
ELP1	elongator complex protein 1 [Source:HGNC Symbol;Acc:HGNC:5959]	8518		ENSG00000070061	protein_coding	1034.12	-0.0325973	0.0657293	-0.495926	0.619947	0.877755
NUCB2	nucleobindin 2 [Source:HGNC Symbol;Acc:HGNC:8044]	4925		ENSG00000070081	protein_coding	763.785	0.163821	0.0752285	2.17776	0.0294242	0.159974
PFN2	profilin 2 [Source:HGNC Symbol;Acc:HGNC:8882]	5217	P35080	ENSG00000070087	protein_coding	1137.62	0.0666803	0.068825	0.968847	0.332622	0.690587
PTPN3	protein tyrosine phosphatase, non-receptor type 3 [Source:HGNC Symbol;Acc:HGNC:9655]	5774	P26045	ENSG00000070159	protein_coding	521.318	-0.0962041	0.0859405	-1.11931	0.263007	0.615487
SPTB	spectrin beta, erythrocytic [Source:HGNC Symbol;Acc:HGNC:11274]	6710	P11277	ENSG00000070182	protein_coding	12.7042	-0.197552	0.13773	-1.43612	0.150967	0.455518
DAPP1	dual adaptor of phosphotyrosine and 3-phosphoinositides 1 [Source:HGNC Symbol;Acc:HGNC:16500]	27071		ENSG00000070190	protein_coding	0.543081	0.0159838	0.0344165	0.493483	0.621672
FGF10	fibroblast growth factor 10 [Source:HGNC Symbol;Acc:HGNC:3666]	2255	O15520	ENSG00000070193	protein_coding	0
SLC44A1	solute carrier family 44 member 1 [Source:HGNC Symbol;Acc:HGNC:18798]	23446	Q8WWI5	ENSG00000070214	protein_coding	1650.52	-0.119118	0.0579263	-2.0563	0.039754	0.196538
TMEM260	transmembrane protein 260 [Source:HGNC Symbol;Acc:HGNC:20185]	54916		ENSG00000070269	protein_coding	344.048	-0.172987	0.0976675	-1.77056	0.076634	0.302411
SMG6	SMG6, nonsense mediated mRNA decay factor [Source:HGNC Symbol;Acc:HGNC:17809]	23293	Q86US8	ENSG00000070366	protein_coding	423.376	-0.0262458	0.0899232	-0.291865	0.770389	0.933915
EXOC5	exocyst complex component 5 [Source:HGNC Symbol;Acc:HGNC:10696]	10640	O00471	ENSG00000070367	protein_coding	1796.06	0.0621298	0.0579046	1.07299	0.283276	0.641003
CLTCL1	clathrin heavy chain like 1 [Source:HGNC Symbol;Acc:HGNC:2093]	8218	P53675	ENSG00000070371	protein_coding	283.084	-0.0205437	0.105659	-0.194418	0.845848	0.957159
FGF22	fibroblast growth factor 22 [Source:HGNC Symbol;Acc:HGNC:3679]	27006		ENSG00000070388	protein_coding	3.28499	0.0732574	0.0862392	0.856276	0.391845
FSTL3	follistatin like 3 [Source:HGNC Symbol;Acc:HGNC:3973]	10272	O95633	ENSG00000070404	protein_coding	782.554	0.128783	0.0833598	1.54494	0.12236	0.403136
DGCR2	DiGeorge syndrome critical region gene 2 [Source:HGNC Symbol;Acc:HGNC:2845]	9993		ENSG00000070413	protein_coding	1787.71	-0.167245	0.0651795	-2.56583	0.0102928	0.0734883
RNF126	ring finger protein 126 [Source:HGNC Symbol;Acc:HGNC:21151]	55658		ENSG00000070423	protein_coding	388.591	0.0498099	0.100957	0.493429	0.62171	0.87858
MNT	MAX network transcriptional repressor [Source:HGNC Symbol;Acc:HGNC:7188]	4335	Q99583	ENSG00000070444	protein_coding	130.831	-0.0519994	0.139972	-0.371312	0.710405	0.913542
ZXDC	ZXD family zinc finger C [Source:HGNC Symbol;Acc:HGNC:28160]	79364	Q2QGD7	ENSG00000070476	protein_coding	544.059	-0.0888818	0.0837848	-1.06075	0.288801	0.648231
JMJD6	arginine demethylase and lysine hydroxylase [Source:HGNC Symbol;Acc:HGNC:19355]	23210	Q6NYC1	ENSG00000070495	protein_coding	1076.15	0.153231	0.0659175	2.32469	0.0200884	0.121578
POLB	DNA polymerase beta [Source:HGNC Symbol;Acc:HGNC:9174]	5423		ENSG00000070501	protein_coding	218.152	-0.000895974	0.113952	-0.00786356	0.993726	0.998628
ST6GALNAC1	ST6 N-acetylgalactosaminide alpha-2,6-sialyltransferase 1 [Source:HGNC Symbol;Acc:HGNC:23614]	55808		ENSG00000070526	protein_coding	0
WIPI1	WD repeat domain, phosphoinositide interacting 1 [Source:HGNC Symbol;Acc:HGNC:25471]	55062		ENSG00000070540	protein_coding	762.551	-0.172936	0.0851875	-2.02992	0.0423648	0.205332
FRMPD1	FERM and PDZ domain containing 1 [Source:HGNC Symbol;Acc:HGNC:29159]	22844	Q5SYB0	ENSG00000070601	protein_coding	1.30115	0.056006	0.0563972	1.02908	0.303441
GBA2	glucosylceramidase beta 2 [Source:HGNC Symbol;Acc:HGNC:18986]	57704	Q9HCG7	ENSG00000070610	protein_coding	679.605	-0.206986	0.0769602	-2.68895	0.00716771	0.0561401
NDST1	N-deacetylase and N-sulfotransferase 1 [Source:HGNC Symbol;Acc:HGNC:7680]	3340		ENSG00000070614	protein_coding	7782.03	-0.157652	0.0546794	-2.88319	0.00393671	0.0352094
ASNS	asparagine synthetase (glutamine-hydrolyzing) [Source:HGNC Symbol;Acc:HGNC:753]	440	P08243	ENSG00000070669	protein_coding	11.2386	0.0868196	0.131949	0.657078	0.511131	0.821882
AP3M2	adaptor related protein complex 3 mu 2 subunit [Source:HGNC Symbol;Acc:HGNC:570]	10947	P53677	ENSG00000070718	protein_coding	281.935	-0.206636	0.108725	-1.89985	0.0574534	0.250097
CNGB1	cyclic nucleotide gated channel beta 1 [Source:HGNC Symbol;Acc:HGNC:2151]	1258	Q14028	ENSG00000070729	protein_coding	4.4694	0.236087	0.094799	2.59236	0.00953186	0.0693797
ST6GALNAC2	ST6 N-acetylgalactosaminide alpha-2,6-sialyltransferase 2 [Source:HGNC Symbol;Acc:HGNC:10867]	10610	Q9UJ37	ENSG00000070731	protein_coding	0.644456	0.00905896	0.0390933	0.229881	0.818184
CHAT	choline O-acetyltransferase [Source:HGNC Symbol;Acc:HGNC:1912]	1103	P28329	ENSG00000070748	protein_coding	2.07471	0.107261	0.0677667	1.67911	0.0931314
PABPC1	poly(A) binding protein cytoplasmic 1 [Source:HGNC Symbol;Acc:HGNC:8554]	26986		ENSG00000070756	protein_coding	4969.82	-0.0300602	0.0646655	-0.464854	0.642036	0.887409
TESK2	testis-specific kinase 2 [Source:HGNC Symbol;Acc:HGNC:11732]	10420	Q96S53	ENSG00000070759	protein_coding	16.5297	0.0744544	0.142999	0.522277	0.601478	0.868993
CFAP20	cilia and flagella associated protein 20 [Source:HGNC Symbol;Acc:HGNC:29523]	29105	Q9Y6A4	ENSG00000070761	protein_coding	787.603	-0.00265413	0.0791283	-0.0335415	0.973243	0.993262
CSNK2A2	casein kinase 2 alpha 2 [Source:HGNC Symbol;Acc:HGNC:2459]	1459	P19784	ENSG00000070770	protein_coding	952.887	-0.117763	0.0681806	-1.72709	0.0841507	0.319789
PTPN21	protein tyrosine phosphatase, non-receptor type 21 [Source:HGNC Symbol;Acc:HGNC:9651]	11099	Q16825	ENSG00000070778	protein_coding	172.862	-0.107844	0.121891	-0.884502	0.376425	0.729612
EIF2B3	eukaryotic translation initiation factor 2B subunit gamma [Source:HGNC Symbol;Acc:HGNC:3259]	8891		ENSG00000070785	protein_coding	432.903	0.062385	0.0945682	0.659721	0.509433	0.821072
CAMK2A	calcium/calmodulin dependent protein kinase II alpha [Source:HGNC Symbol;Acc:HGNC:1460]	815	Q9UQM7	ENSG00000070808	protein_coding	0.421971	-0.0260781	0.0339428	-0.696091	0.486372
TCOF1	treacle ribosome biogenesis factor 1 [Source:HGNC Symbol;Acc:HGNC:11654]	6949	Q13428	ENSG00000070814	protein_coding	1476.56	0.0197722	0.0672311	0.294092	0.768688	0.933241
CDC42	cell division cycle 42 [Source:HGNC Symbol;Acc:HGNC:1736]	998	P60953	ENSG00000070831	protein_coding	9502.94	0.0987748	0.0476194	2.07426	0.038055	0.191268
OSBPL3	oxysterol binding protein like 3 [Source:HGNC Symbol;Acc:HGNC:16370]	26031	Q9H4L5	ENSG00000070882	protein_coding	286.138	0.828859	0.107997	7.66542	1.7824e-14	1.90424e-12
EPHA8	EPH receptor A8 [Source:HGNC Symbol;Acc:HGNC:3391]	2046	P29322	ENSG00000070886	protein_coding	0
SLC12A3	solute carrier family 12 member 3 [Source:HGNC Symbol;Acc:HGNC:10912]	6559	P55017	ENSG00000070915	protein_coding	144.882	1.3386	0.136296	9.73113	2.22119e-22	5.72316e-20
RAD18	RAD18, E3 ubiquitin protein ligase [Source:HGNC Symbol;Acc:HGNC:18278]	56852		ENSG00000070950	protein_coding	1253.2	0.083312	0.0626332	1.33021	0.18345	0.507456
ATP2B1	ATPase plasma membrane Ca2+ transporting 1 [Source:HGNC Symbol;Acc:HGNC:814]	490	P20020	ENSG00000070961	protein_coding	2554.29	-0.115966	0.0534673	-2.16886	0.0300933	0.162786
TRPM5	transient receptor potential cation channel subfamily M member 5 [Source:HGNC Symbol;Acc:HGNC:14323]	29850		ENSG00000070985	protein_coding	1.97308	0.082966	0.0680932	1.26131	0.207198
NCK2	NCK adaptor protein 2 [Source:HGNC Symbol;Acc:HGNC:7665]	8440	O43639	ENSG00000071051	protein_coding	920.013	0.411968	0.0713234	5.77605	7.64763e-09	3.30035e-07
MAP4K4	mitogen-activated protein kinase kinase kinase kinase 4 [Source:HGNC Symbol;Acc:HGNC:6866]	9448		ENSG00000071054	protein_coding	6414.38	-0.0628078	0.0449004	-1.39882	0.161866	0.473439
MGAT4A	mannosyl (alpha-1,3-)-glycoprotein beta-1,4-N-acetylglucosaminyltransferase, isozyme A [Source:HGNC Symbol;Acc:HGNC:7047]	11320	Q9UM21	ENSG00000071073	protein_coding	7.86944	-0.132928	0.119374	-1.11725	0.263888	0.616314
RPL31	ribosomal protein L31 [Source:HGNC Symbol;Acc:HGNC:10334]	6160	P62899	ENSG00000071082	protein_coding	18766.4	-0.0917566	0.0526156	-1.7439	0.0811762	0.313073
WDR1	WD repeat domain 1 [Source:HGNC Symbol;Acc:HGNC:12754]	9948	O75083	ENSG00000071127	protein_coding	6334.11	0.0214843	0.0444144	0.483724	0.628582	0.882341
SNX13	sorting nexin 13 [Source:HGNC Symbol;Acc:HGNC:21335]	23161	Q9Y5W8	ENSG00000071189	protein_coding	1238.37	-0.0281594	0.0629804	-0.447109	0.654796	0.892677
MS4A12	membrane spanning 4-domains A12 [Source:HGNC Symbol;Acc:HGNC:13370]	54860		ENSG00000071203	protein_coding	0.176059	0.00862596	0.0243034	0.354932	0.722641
ARHGAP10	Rho GTPase activating protein 10 [Source:HGNC Symbol;Acc:HGNC:26099]	79658	A1A4S6	ENSG00000071205	protein_coding	763.068	0.0354607	0.0730211	0.485637	0.627224	0.881778
RPS6KA2	ribosomal protein S6 kinase A2 [Source:HGNC Symbol;Acc:HGNC:10431]	6196	Q15349	ENSG00000071242	protein_coding	7.82295	-0.117045	0.119458	-0.988197	0.323056	0.682112
ING3	inhibitor of growth family member 3 [Source:HGNC Symbol;Acc:HGNC:14587]	54556	Q9NXR8	ENSG00000071243	protein_coding	294.494	0.0861616	0.111494	0.772914	0.439573	0.7795
VASH1	vasohibin 1 [Source:HGNC Symbol;Acc:HGNC:19964]	22846	Q7L8A9	ENSG00000071246	protein_coding	84.9813	-0.189169	0.149327	-1.26495	0.205888	0.541671
LMCD1	LIM and cysteine rich domains 1 [Source:HGNC Symbol;Acc:HGNC:6633]	29995	Q9NZU5	ENSG00000071282	protein_coding	2544.7	0.366712	0.0574527	6.38291	1.73759e-10	1.01144e-08
BUD23	BUD23, rRNA methyltransferase and ribosome maturation factor [Source:HGNC Symbol;Acc:HGNC:16405]	114049	O43709	ENSG00000071462	protein_coding	975.095	-0.111506	0.0671434	-1.66059	0.0967961	0.348668
SEL1L	SEL1L ERAD E3 ligase adaptor subunit [Source:HGNC Symbol;Acc:HGNC:10717]	6400	Q9UBV2	ENSG00000071537	protein_coding	2861.75	-0.0529752	0.0494448	-1.07139	0.283995	0.642296
TRIP13	thyroid hormone receptor interactor 13 [Source:HGNC Symbol;Acc:HGNC:12307]	9319	Q15645	ENSG00000071539	protein_coding	1675.18	0.0752181	0.0589236	1.27655	0.201763	0.536106
ATP6AP1	ATPase H+ transporting accessory protein 1 [Source:HGNC Symbol;Acc:HGNC:868]	537	Q15904	ENSG00000071553	protein_coding	1780.62	-0.164276	0.0595845	-2.75688	0.00583565	0.0478681
TCF3	transcription factor 3 [Source:HGNC Symbol;Acc:HGNC:11633]	6929		ENSG00000071564	protein_coding	2122.75	0.310781	0.0607067	5.11945	3.06424e-07	9.72618e-06
TRIB2	tribbles pseudokinase 2 [Source:HGNC Symbol;Acc:HGNC:30809]	28951	Q92519	ENSG00000071575	protein_coding	0.367895	0.00450907	0.0302669	0.148979	0.88157
DAZAP1	DAZ associated protein 1 [Source:HGNC Symbol;Acc:HGNC:2683]	26528	Q96EP5	ENSG00000071626	protein_coding	2873.73	0.0138854	0.0526501	0.263729	0.791989	0.94103
MBD3	methyl-CpG binding domain protein 3 [Source:HGNC Symbol;Acc:HGNC:6918]	53615	O95983	ENSG00000071655	protein_coding	1078.61	-0.0224661	0.0763591	-0.294214	0.768594	0.933232
PRLH	prolactin releasing hormone [Source:HGNC Symbol;Acc:HGNC:17945]	51052	P81277	ENSG00000071677	protein_coding	0.152699	-0.00283079	0.0243034	-0.116473	0.907278
HLTF	helicase like transcription factor [Source:HGNC Symbol;Acc:HGNC:11099]	6596		ENSG00000071794	protein_coding	2977.65	0.379752	0.0523788	7.25016	4.16278e-13	3.65294e-11
FAM50A	family with sequence similarity 50 member A [Source:HGNC Symbol;Acc:HGNC:18786]	9130	Q14320	ENSG00000071859	protein_coding	1803.86	-0.218482	0.058418	-3.73969	0.00018425	0.00285938
FAM3A	family with sequence similarity 3 member A [Source:HGNC Symbol;Acc:HGNC:13749]	60343	P98173	ENSG00000071889	protein_coding	879.779	-0.256712	0.0708569	-3.62216	0.000292152	0.00422691
CPSF1	cleavage and polyadenylation specific factor 1 [Source:HGNC Symbol;Acc:HGNC:2324]	29894		ENSG00000071894	protein_coding	1646.9	-0.0806315	0.0638071	-1.26362	0.206367	0.542254
MYO3B	myosin IIIB [Source:HGNC Symbol;Acc:HGNC:15576]	140469	Q8WXR4	ENSG00000071909	protein_coding	1.68934	0.0358761	0.060131	0.602712	0.546701
CYBRD1	cytochrome b reductase 1 [Source:HGNC Symbol;Acc:HGNC:20797]	79901	Q53TN4	ENSG00000071967	protein_coding	2754.53	0.0031412	0.0534249	0.0587968	0.953114	0.9876
CDH19	cadherin 19 [Source:HGNC Symbol;Acc:HGNC:1758]	28513	Q9H159	ENSG00000071991	protein_coding	0.924887	0.022908	0.0445765	0.527892	0.597574
PDCD2	programmed cell death 2 [Source:HGNC Symbol;Acc:HGNC:8762]	5134	Q16342	ENSG00000071994	protein_coding	926.215	-0.00697892	0.0699401	-0.0997851	0.920515	0.980089
SLC6A15	solute carrier family 6 member 15 [Source:HGNC Symbol;Acc:HGNC:13621]	55117	Q9H2J7	ENSG00000072041	protein_coding	378.229	0.138819	0.0963435	1.44092	0.149606	0.453582
RDH11	retinol dehydrogenase 11 (all-trans/9-cis/11-cis) [Source:HGNC Symbol;Acc:HGNC:17964]	51109	Q8TC12	ENSG00000072042	protein_coding	1607.44	-0.0574119	0.0703422	-0.816182	0.414396	0.762031
PRKACA	protein kinase cAMP-activated catalytic subunit alpha [Source:HGNC Symbol;Acc:HGNC:9380]	5566	P17612	ENSG00000072062	protein_coding	134.444	0.0528101	0.132252	0.399389	0.689607	0.904658
ADGRL1	adhesion G protein-coupled receptor L1 [Source:HGNC Symbol;Acc:HGNC:20973]	22859	O94910	ENSG00000072071	protein_coding	106.604	0.122806	0.140897	0.871806	0.383314	0.735575
SPP2	secreted phosphoprotein 2 [Source:HGNC Symbol;Acc:HGNC:11256]	6694	Q13103	ENSG00000072080	protein_coding	0
ACTN1	actinin alpha 1 [Source:HGNC Symbol;Acc:HGNC:163]	87	P12814	ENSG00000072110	protein_coding	5014.17	0.0820636	0.0550192	1.49155	0.135817	0.429078
ZFYVE26	zinc finger FYVE-type containing 26 [Source:HGNC Symbol;Acc:HGNC:20761]	23503	Q68DK2	ENSG00000072121	protein_coding	789.359	-0.226612	0.0734225	-3.08581	0.00202999	0.0210334
RPS6KA6	ribosomal protein S6 kinase A6 [Source:HGNC Symbol;Acc:HGNC:10435]	27330	Q9UK32	ENSG00000072133	protein_coding	249.837	0.256833	0.113095	2.27177	0.0231003	0.134644
EPN2	epsin 2 [Source:HGNC Symbol;Acc:HGNC:18639]	22905		ENSG00000072134	protein_coding	200.345	0.00126431	0.119853	0.0105485	0.991584	0.997912
PTPN18	protein tyrosine phosphatase, non-receptor type 18 [Source:HGNC Symbol;Acc:HGNC:9649]	26469	Q99952	ENSG00000072135	protein_coding	240.812	0.0654858	0.111907	0.585296	0.558349	0.848334
LIMS2	LIM zinc finger domain containing 2 [Source:HGNC Symbol;Acc:HGNC:16084]	55679		ENSG00000072163	protein_coding	7.65427	0.018786	0.118511	0.15891	0.87374	0.965825
ASIC4	acid sensing ion channel subunit family member 4 [Source:HGNC Symbol;Acc:HGNC:21263]	55515	Q96FT7	ENSG00000072182	protein_coding	0.773795	-0.0239862	0.0426454	-0.604335	0.545621
SPEG	SPEG complex locus [Source:HGNC Symbol;Acc:HGNC:16901]	10290	Q15772	ENSG00000072195	protein_coding	17.0704	-0.0269462	0.145789	-0.184936	0.853279	0.959878
LNX1	ligand of numb-protein X 1 [Source:HGNC Symbol;Acc:HGNC:6657]	84708	Q8TBB1	ENSG00000072201	protein_coding	15.6518	0.139972	0.144482	0.969861	0.332116	0.690348
ALDH3A2	aldehyde dehydrogenase 3 family member A2 [Source:HGNC Symbol;Acc:HGNC:403]	224		ENSG00000072210	protein_coding	566.57	-0.0855665	0.0854141	-1.00169	0.316492	0.675181
TFRC	transferrin receptor [Source:HGNC Symbol;Acc:HGNC:11763]	7037		ENSG00000072274	protein_coding	3982.39	0.47539	0.0526502	9.02922	1.72906e-19	3.18894e-17
SREBF1	sterol regulatory element binding transcription factor 1 [Source:HGNC Symbol;Acc:HGNC:11289]	6720		ENSG00000072310	protein_coding	449.682	0.112218	0.0888702	1.26283	0.206652	0.542664
TRPC5	transient receptor potential cation channel subfamily C member 5 [Source:HGNC Symbol;Acc:HGNC:12337]	7224	Q9UL62	ENSG00000072315	protein_coding	1.24435	-0.0318592	0.0550171	-0.594078	0.55246
AFF4	AF4/FMR2 family member 4 [Source:HGNC Symbol;Acc:HGNC:17869]	27125	Q9UHB7	ENSG00000072364	protein_coding	3139.52	0.0164414	0.0564908	0.291048	0.771014	0.934265
UBE2D1	ubiquitin conjugating enzyme E2 D1 [Source:HGNC Symbol;Acc:HGNC:12474]	7321	P51668	ENSG00000072401	protein_coding	557.822	0.151828	0.0825879	1.83859	0.0659749	0.273597
MPP5	membrane palmitoylated protein 5 [Source:HGNC Symbol;Acc:HGNC:18669]	64398	Q8N3R9	ENSG00000072415	protein_coding	1659.56	-0.0535245	0.0583713	-0.916949	0.35917	0.715521
RHOBTB1	Rho related BTB domain containing 1 [Source:HGNC Symbol;Acc:HGNC:18738]	9886	O94844	ENSG00000072422	protein_coding	3051.56	-0.386619	0.0659032	-5.86603	4.46359e-09	2.01563e-07
SMC1A	structural maintenance of chromosomes 1A [Source:HGNC Symbol;Acc:HGNC:11111]	8243	Q14683	ENSG00000072501	protein_coding	2170.66	0.0877846	0.0551607	1.59147	0.111504	0.380214
HSD17B10	hydroxysteroid 17-beta dehydrogenase 10 [Source:HGNC Symbol;Acc:HGNC:4800]	3028	Q99714	ENSG00000072506	protein_coding	1460.48	-0.0205158	0.0646695	-0.31724	0.751061	0.928068
MARK2	microtubule affinity regulating kinase 2 [Source:HGNC Symbol;Acc:HGNC:3332]	2011	Q7KZI7	ENSG00000072518	protein_coding	536.415	-0.0458391	0.0861859	-0.531845	0.594833	0.866501
HMMR	hyaluronan mediated motility receptor [Source:HGNC Symbol;Acc:HGNC:5012]	3161		ENSG00000072571	protein_coding	2359.11	-0.107952	0.055538	-1.94371	0.0519302	0.23348
CHFR	checkpoint with forkhead and ring finger domains [Source:HGNC Symbol;Acc:HGNC:20455]	55743	Q96EP1	ENSG00000072609	protein_coding	347.908	-0.202901	0.0969531	-2.0919	0.0364474	0.1858
TRHDE	thyrotropin releasing hormone degrading enzyme [Source:HGNC Symbol;Acc:HGNC:30748]	29953	Q9UKU6	ENSG00000072657	protein_coding	4.06536	-0.0121826	0.0944069	-0.129144	0.897244
P4HA2	prolyl 4-hydroxylase subunit alpha 2 [Source:HGNC Symbol;Acc:HGNC:8547]	8974	O15460	ENSG00000072682	protein_coding	2430.06	-0.00842916	0.0535247	-0.157482	0.874865	0.966188
FCGR2B	Fc fragment of IgG receptor IIb [Source:HGNC Symbol;Acc:HGNC:3618]	2213	P31994	ENSG00000072694	protein_coding	0
NFATC3	nuclear factor of activated T cells 3 [Source:HGNC Symbol;Acc:HGNC:7777]	4775		ENSG00000072736	protein_coding	342.411	0.149777	0.0990454	1.5123	0.130458	0.419019
TRNT1	tRNA nucleotidyl transferase 1 [Source:HGNC Symbol;Acc:HGNC:17341]	51095	Q96Q11	ENSG00000072756	protein_coding	138.03	0.00491964	0.133947	0.0367179	0.97071	0.992345
ACADVL	acyl-CoA dehydrogenase very long chain [Source:HGNC Symbol;Acc:HGNC:92]	37	P49748	ENSG00000072778	protein_coding	6565.26	-0.0425931	0.0418868	-1.01686	0.30922	0.6679
STK10	serine/threonine kinase 10 [Source:HGNC Symbol;Acc:HGNC:11388]	6793	O94804	ENSG00000072786	protein_coding	1001.97	0.441489	0.070171	6.29163	3.14146e-10	1.76575e-08
FBXW11	F-box and WD repeat domain containing 11 [Source:HGNC Symbol;Acc:HGNC:13607]	23291	Q9UKB1	ENSG00000072803	protein_coding	1682.67	0.105531	0.0579674	1.82059	0.0686697	0.281235
ACAP1	ArfGAP with coiled-coil, ankyrin repeat and PH domains 1 [Source:HGNC Symbol;Acc:HGNC:16467]	9744	Q15027	ENSG00000072818	protein_coding	69.9888	0.482284	0.152747	3.1547	0.00160664	0.0174303
CRMP1	collapsin response mediator protein 1 [Source:HGNC Symbol;Acc:HGNC:2365]	1400	Q14194	ENSG00000072832	protein_coding	96.6214	-0.168432	0.143287	-1.17495	0.240017	0.588755
EVC	EvC ciliary complex subunit 1 [Source:HGNC Symbol;Acc:HGNC:3497]	2121	P57679	ENSG00000072840	protein_coding	868.783	-0.207676	0.0706185	-2.94033	0.00327865	0.0304642
DERL2	derlin 2 [Source:HGNC Symbol;Acc:HGNC:17943]	51009	Q9GZP9	ENSG00000072849	protein_coding	1001.81	-0.0663546	0.0712391	-0.931431	0.351631	0.70864
SIDT1	SID1 transmembrane family member 1 [Source:HGNC Symbol;Acc:HGNC:25967]	54847	Q9NXL6	ENSG00000072858	protein_coding	1.275	0.0158894	0.0544444	0.288936	0.77263
NDE1	nudE neurodevelopment protein 1 [Source:HGNC Symbol;Acc:HGNC:17619]	54820	Q9NXR1	ENSG00000072864	protein_coding	553.963	0.143476	0.0858194	1.67187	0.0945499	0.342839
MRVI1	murine retrovirus integration site 1 homolog [Source:HGNC Symbol;Acc:HGNC:7237]	10335	Q9Y6F6	ENSG00000072952	protein_coding	0.328758	0.00416899	0.0291134	0.143201	0.886132
TMEM38A	transmembrane protein 38A [Source:HGNC Symbol;Acc:HGNC:28462]	79041	Q9H6F2	ENSG00000072954	protein_coding	33.5942	-0.103089	0.156721	-0.657447	0.510893	0.821882
AP1M1	adaptor related protein complex 1 mu 1 subunit [Source:HGNC Symbol;Acc:HGNC:13667]	8907	Q9BXS5	ENSG00000072958	protein_coding	1224.79	-0.0692999	0.0643715	-1.07652	0.281695	0.63924
PVR	poliovirus receptor [Source:HGNC Symbol;Acc:HGNC:9705]	5817		ENSG00000073008	protein_coding	2347.22	-0.101607	0.0526432	-1.93009	0.0535963	0.238219
XRCC1	X-ray repair cross complementing 1 [Source:HGNC Symbol;Acc:HGNC:12828]	7515	P18887	ENSG00000073050	protein_coding	385.885	-0.191705	0.095265	-2.01176	0.0442451	0.211116
SCARB1	scavenger receptor class B member 1 [Source:HGNC Symbol;Acc:HGNC:1664]	949	Q8WTV0	ENSG00000073060	protein_coding	1108.29	0.442971	0.0754273	5.87275	4.2863e-09	1.9456e-07
CYP2W1	cytochrome P450 family 2 subfamily W member 1 [Source:HGNC Symbol;Acc:HGNC:20243]	54905	Q8TAV3	ENSG00000073067	protein_coding	8.32129	0.231975	0.119469	1.95618	0.0504436	0.229386
MCM2	minichromosome maintenance complex component 2 [Source:HGNC Symbol;Acc:HGNC:6944]	4171	P49736	ENSG00000073111	protein_coding	4580.19	0.118746	0.0552282	2.1501	0.0315473	0.168229
MOV10L1	Mov10 RISC complex RNA helicase like 1 [Source:HGNC Symbol;Acc:HGNC:7201]	54456	Q9BXT6	ENSG00000073146	protein_coding	0.342876	0.00429397	0.0295428	0.14535	0.884435
PANX2	pannexin 2 [Source:HGNC Symbol;Acc:HGNC:8600]	56666	Q96RD6	ENSG00000073150	protein_coding	1.14927	0.02431	0.0518833	0.468205	0.639638
SELENOO	selenoprotein O [Source:HGNC Symbol;Acc:HGNC:30395]	83642	Q9BVL4	ENSG00000073169	protein_coding	377.67	-0.133205	0.10333	-1.28895	0.197415	0.528319
TP63	tumor protein p63 [Source:HGNC Symbol;Acc:HGNC:15979]	8626	Q9H3D4	ENSG00000073282	protein_coding	1.36473	0.0799614	0.056433	1.59639	0.110401
ALPK1	alpha kinase 1 [Source:HGNC Symbol;Acc:HGNC:20917]	80216	Q96QP1	ENSG00000073331	protein_coding	377.635	-0.244429	0.0939116	-2.60157	0.00927985	0.0681443
LLGL2	LLGL2, scribble cell polarity complex component [Source:HGNC Symbol;Acc:HGNC:6629]	3993		ENSG00000073350	protein_coding	819.307	0.115576	0.0746438	1.54839	0.121529	0.401454
PDE8A	phosphodiesterase 8A [Source:HGNC Symbol;Acc:HGNC:8793]	5151	O60658	ENSG00000073417	protein_coding	584.96	0.0859113	0.0820603	1.04698	0.295108	0.65376
CLCN4	chloride voltage-gated channel 4 [Source:HGNC Symbol;Acc:HGNC:2022]	1183	P51793	ENSG00000073464	protein_coding	165.086	0.154686	0.127608	1.21211	0.225469	0.568942
NLE1	notchless homolog 1 [Source:HGNC Symbol;Acc:HGNC:19889]	54475	Q9NVX2	ENSG00000073536	protein_coding	633.448	0.0243763	0.0803521	0.30338	0.7616	0.931314
SDHA	succinate dehydrogenase complex flavoprotein subunit A [Source:HGNC Symbol;Acc:HGNC:10680]	6389	P31040	ENSG00000073578	protein_coding	4513.41	0.104083	0.0493858	2.10755	0.0350698	0.180776
SMARCE1	SWI/SNF related, matrix associated, actin dependent regulator of chromatin, subfamily e, member 1 [Source:HGNC Symbol;Acc:HGNC:11109]	6605	Q969G3	ENSG00000073584	protein_coding	1288.22	-0.0453737	0.0619915	-0.731921	0.464217	0.794447
FNDC8	fibronectin type III domain containing 8 [Source:HGNC Symbol;Acc:HGNC:25286]	54752	Q8TC99	ENSG00000073598	protein_coding	0
GSDMB	gasdermin B [Source:HGNC Symbol;Acc:HGNC:23690]	55876	Q8TAX9	ENSG00000073605	protein_coding	50.9954	-0.179551	0.157087	-1.14249	0.253251	0.604279
KDM5A	lysine demethylase 5A [Source:HGNC Symbol;Acc:HGNC:9886]	5927	P29375	ENSG00000073614	protein_coding	2336.65	0.0180955	0.0531142	0.340692	0.733336	0.922183
ADAM11	ADAM metallopeptidase domain 11 [Source:HGNC Symbol;Acc:HGNC:189]	4185	O75078	ENSG00000073670	protein_coding	9.80487	-0.00457087	0.127753	-0.0357067	0.971516	0.992475
PPP2R3A	protein phosphatase 2 regulatory subunit B''alpha [Source:HGNC Symbol;Acc:HGNC:9307]	5523	Q06190	ENSG00000073711	protein_coding	1149.52	-0.0285795	0.0655289	-0.436138	0.662737	0.895489
FERMT2	fermitin family member 2 [Source:HGNC Symbol;Acc:HGNC:15767]	10979	Q96AC1	ENSG00000073712	protein_coding	3796.36	0.165219	0.0492392	3.3555	0.000792213	0.0097749
ABCB11	ATP binding cassette subfamily B member 11 [Source:HGNC Symbol;Acc:HGNC:42]	8647	O95342	ENSG00000073734	protein_coding	0.1266	-0.00283079	0.0243034	-0.116473	0.907278
DHRS9	dehydrogenase/reductase 9 [Source:HGNC Symbol;Acc:HGNC:16888]	10170	Q9BPW9	ENSG00000073737	protein_coding	1.59111	-0.0257325	0.0621272	-0.42145	0.673427
CD5L	CD5 molecule like [Source:HGNC Symbol;Acc:HGNC:1690]	922	O43866	ENSG00000073754	protein_coding	0.4154	0.0241033	0.0314289	0.781378	0.43458
PTGS2	prostaglandin-endoperoxide synthase 2 [Source:HGNC Symbol;Acc:HGNC:9605]	5743	P35354	ENSG00000073756	protein_coding	13.2261	0.216545	0.136663	1.59051	0.111719	0.380626
IGF2BP2	insulin like growth factor 2 mRNA binding protein 2 [Source:HGNC Symbol;Acc:HGNC:28867]	10644	Q9Y6M1	ENSG00000073792	protein_coding	871.807	-0.0129159	0.0783265	-0.164891	0.86903	0.963793
MAP3K13	mitogen-activated protein kinase kinase kinase 13 [Source:HGNC Symbol;Acc:HGNC:6852]	9175		ENSG00000073803	protein_coding	438.664	-0.048298	0.0919482	-0.525219	0.599431	0.867797
ST6GAL1	ST6 beta-galactoside alpha-2,6-sialyltransferase 1 [Source:HGNC Symbol;Acc:HGNC:10860]	6480	P15907	ENSG00000073849	protein_coding	6.27955	-0.0606599	0.108719	-0.557516	0.577175	0.856606
TBX21	T-box 21 [Source:HGNC Symbol;Acc:HGNC:11599]	30009	Q9UL17	ENSG00000073861	protein_coding	0.29537	-0.0113483	0.0279572	-0.411234	0.680901
				ENSG00000073905		8.63187	0.050972	0.124833	0.408448	0.682945	0.902521
FRY	FRY microtubule binding protein [Source:HGNC Symbol;Acc:HGNC:20367]	10129		ENSG00000073910	protein_coding	2.67984	-0.0271204	0.077757	-0.349061	0.727043
PICALM	phosphatidylinositol binding clathrin assembly protein [Source:HGNC Symbol;Acc:HGNC:15514]	8301	Q13492	ENSG00000073921	protein_coding	4846.51	0.00228153	0.0461037	0.0494866	0.960532	0.989949
NSF	N-ethylmaleimide sensitive factor, vesicle fusing ATPase [Source:HGNC Symbol;Acc:HGNC:8016]	4905	P46459	ENSG00000073969	protein_coding	802.233	0.104131	0.0727586	1.43122	0.152367	0.458146
GLI2	GLI family zinc finger 2 [Source:HGNC Symbol;Acc:HGNC:4318]	2736		ENSG00000074047	protein_coding	14.5309	-0.0924429	0.139522	-0.661842	0.508073	0.820914
CLASP1	cytoplasmic linker associated protein 1 [Source:HGNC Symbol;Acc:HGNC:17088]	23332		ENSG00000074054	protein_coding	1140.44	-0.0461801	0.0666762	-0.692579	0.488574	0.810153
MRPS34	mitochondrial ribosomal protein S34 [Source:HGNC Symbol;Acc:HGNC:16618]	65993		ENSG00000074071	protein_coding	1122.63	-0.054539	0.0659145	-0.827385	0.408019	0.756497
NOTCH3	notch 3 [Source:HGNC Symbol;Acc:HGNC:7883]	4854	Q9UM47	ENSG00000074181	protein_coding	21.4929	0.438415	0.149301	2.94477	0.00323191	0.030196
CLNS1A	chloride nucleotide-sensitive channel 1A [Source:HGNC Symbol;Acc:HGNC:2080]	1207		ENSG00000074201	protein_coding	3623.03	-0.0517734	0.0471515	-1.09802	0.272197	0.627274
PPP2R2C	protein phosphatase 2 regulatory subunit Bgamma [Source:HGNC Symbol;Acc:HGNC:9306]	5522	Q9Y2T4	ENSG00000074211	protein_coding	1.00802	-0.0404409	0.0479829	-0.915978	0.359678
TEAD2	TEA domain transcription factor 2 [Source:HGNC Symbol;Acc:HGNC:11715]	8463	Q15562	ENSG00000074219	protein_coding	114.462	0.0940844	0.140598	0.669644	0.503085	0.818075
EED	embryonic ectoderm development [Source:HGNC Symbol;Acc:HGNC:3188]	8726	O75530	ENSG00000074266	protein_coding	602.786	0.200936	0.0792753	2.53485	0.0112496	0.0784338
CDHR2	cadherin related family member 2 [Source:HGNC Symbol;Acc:HGNC:18231]	54825	Q9BYE9	ENSG00000074276	protein_coding	3.27409	0.00146043	0.0749027	0.019557	0.984397
SNCB	synuclein beta [Source:HGNC Symbol;Acc:HGNC:11140]	6620	Q16143	ENSG00000074317	protein_coding	0
TSG101	tumor susceptibility 101 [Source:HGNC Symbol;Acc:HGNC:15971]	7251		ENSG00000074319	protein_coding	1007.55	0.00250184	0.0658191	0.0380109	0.969679	0.99186
NCBP3	nuclear cap binding subunit 3 [Source:HGNC Symbol;Acc:HGNC:24612]	55421	Q53F19	ENSG00000074356	protein_coding	983.444	-0.0073355	0.0675788	-0.108546	0.913563	0.978395
ATP2A3	ATPase sarcoplasmic/endoplasmic reticulum Ca2+ transporting 3 [Source:HGNC Symbol;Acc:HGNC:813]	489	Q93084	ENSG00000074370	protein_coding	14.2002	0.495314	0.133117	3.8057	0.000141406	0.00227509
CA12	carbonic anhydrase 12 [Source:HGNC Symbol;Acc:HGNC:1371]	771	O43570	ENSG00000074410	protein_coding	4.16289	0.0794505	0.0931161	0.852902	0.393714
MGLL	monoglyceride lipase [Source:HGNC Symbol;Acc:HGNC:17038]	11343	Q99685	ENSG00000074416	protein_coding	1595.25	0.139619	0.0570272	2.44837	0.0143502	0.0941687
NTN4	netrin 4 [Source:HGNC Symbol;Acc:HGNC:13658]	59277	Q9HB63	ENSG00000074527	protein_coding	688.146	-0.162663	0.0804604	-2.02135	0.043244	0.208262
BCS1L	BCS1 homolog, ubiquinol-cytochrome c reductase complex chaperone [Source:HGNC Symbol;Acc:HGNC:1020]	617		ENSG00000074582	protein_coding	298	-0.0673017	0.104499	-0.643952	0.519606	0.82649
NUAK1	NUAK family kinase 1 [Source:HGNC Symbol;Acc:HGNC:14311]	9891	O60285	ENSG00000074590	protein_coding	1981.34	-0.0256344	0.060976	-0.420405	0.67419	0.898622
DPP8	dipeptidyl peptidase 8 [Source:HGNC Symbol;Acc:HGNC:16490]	54878	Q6V1X1	ENSG00000074603	protein_coding	888.69	-0.0608752	0.0698164	-0.871905	0.38326	0.735575
SLC24A1	solute carrier family 24 member 1 [Source:HGNC Symbol;Acc:HGNC:10975]	9187		ENSG00000074621	protein_coding	371.03	-0.223821	0.100055	-2.23613	0.0253434	0.143239
ZNF532	zinc finger protein 532 [Source:HGNC Symbol;Acc:HGNC:30940]	55205	Q9HCE3	ENSG00000074657	protein_coding	830.184	0.126806	0.0715719	1.77184	0.0764214	0.301776
SCARF1	scavenger receptor class F member 1 [Source:HGNC Symbol;Acc:HGNC:16820]	8578	Q14162	ENSG00000074660	protein_coding	22.8227	0.0855894	0.152585	0.561747	0.574288	0.855894
LMAN1	lectin, mannose binding 1 [Source:HGNC Symbol;Acc:HGNC:6631]	3998	P49257	ENSG00000074695	protein_coding	4901.83	0.122269	0.0448028	2.72907	0.00635139	0.0511838
HACD3	3-hydroxyacyl-CoA dehydratase 3 [Source:HGNC Symbol;Acc:HGNC:24175]	51495		ENSG00000074696	protein_coding	6926.18	0.0619895	0.0432791	1.43233	0.152051	0.457588
IPCEF1	interaction protein for cytohesin exchange factors 1 [Source:HGNC Symbol;Acc:HGNC:21204]	26034	Q8WWN9	ENSG00000074706	protein_coding	25.9224	0.0363065	0.154719	0.234717	0.814429	0.94821
ZZEF1	zinc finger ZZ-type and EF-hand domain containing 1 [Source:HGNC Symbol;Acc:HGNC:29027]	23140	O43149	ENSG00000074755	protein_coding	1019.14	-0.155384	0.0708206	-2.19383	0.0282479	0.154908
NOX3	NADPH oxidase 3 [Source:HGNC Symbol;Acc:HGNC:7890]	50508	Q9HBY0	ENSG00000074771	protein_coding	0.200205	0.00862596	0.0243034	0.354932	0.722641
ENO1	enolase 1 [Source:HGNC Symbol;Acc:HGNC:3350]	2023		ENSG00000074800	protein_coding	41632.2	-0.150678	0.048653	-3.09699	0.00195496	0.0203886
SLC12A1	solute carrier family 12 member 1 [Source:HGNC Symbol;Acc:HGNC:10910]	6557		ENSG00000074803	protein_coding	0.648274	-0.0166771	0.0391773	-0.427695	0.668873
MYDGF	myeloid derived growth factor [Source:HGNC Symbol;Acc:HGNC:16948]	56005		ENSG00000074842	protein_coding	1197.11	-0.0307418	0.0668672	-0.459731	0.645709	0.888307
ANO8	anoctamin 8 [Source:HGNC Symbol;Acc:HGNC:29329]	57719		ENSG00000074855	protein_coding	107.525	-0.102955	0.139665	-0.736791	0.461249	0.792154
TUBE1	tubulin epsilon 1 [Source:HGNC Symbol;Acc:HGNC:20775]	51175	Q9UJT0	ENSG00000074935	protein_coding	166.534	0.181486	0.123542	1.46955	0.141683	0.439827
ARHGEF10L	Rho guanine nucleotide exchange factor 10 like [Source:HGNC Symbol;Acc:HGNC:25540]	55160	Q9HCE6	ENSG00000074964	protein_coding	1270.61	-0.0747515	0.0606781	-1.23189	0.217989	0.558471
TXK	TXK tyrosine kinase [Source:HGNC Symbol;Acc:HGNC:12434]	7294	P42681	ENSG00000074966	protein_coding	8.21956	0.030752	0.121224	0.25364	0.799774	0.943973
WSCD2	WSC domain containing 2 [Source:HGNC Symbol;Acc:HGNC:29117]	9671	Q2TBF2	ENSG00000075035	protein_coding	0
KCNQ2	potassium voltage-gated channel subfamily Q member 2 [Source:HGNC Symbol;Acc:HGNC:6296]	3785	O43526	ENSG00000075043	protein_coding	5.06421	0.0797854	0.100786	0.792825	0.42788	0.771125
TACR2	tachykinin receptor 2 [Source:HGNC Symbol;Acc:HGNC:11527]	6865		ENSG00000075073	protein_coding	4.17759	0.199566	0.0936443	2.20593	0.0273888
ACTR6	ARP6 actin related protein 6 homolog [Source:HGNC Symbol;Acc:HGNC:24025]	64431		ENSG00000075089	protein_coding	527.271	0.16826	0.0863577	1.94854	0.0513506	0.231706
TIPIN	TIMELESS interacting protein [Source:HGNC Symbol;Acc:HGNC:30750]	54962	Q9BVW5	ENSG00000075131	protein_coding	303.609	0.266666	0.101192	2.63574	0.00839545	0.0634311
SRI	sorcin [Source:HGNC Symbol;Acc:HGNC:11292]	6717	P30626	ENSG00000075142	protein_coding	1665.59	0.0104833	0.0594484	0.176341	0.860026	0.961002
EIF4G3	eukaryotic translation initiation factor 4 gamma 3 [Source:HGNC Symbol;Acc:HGNC:3298]	8672	O43432	ENSG00000075151	protein_coding	1049.42	-0.0129571	0.0706216	-0.183474	0.854426	0.960086
NUP37	nucleoporin 37 [Source:HGNC Symbol;Acc:HGNC:29929]	79023	Q8NFH4	ENSG00000075188	protein_coding	647.405	0.0226118	0.0781538	0.289325	0.772333	0.934443
SEMA3A	semaphorin 3A [Source:HGNC Symbol;Acc:HGNC:10723]	10371	Q14563	ENSG00000075213	protein_coding	209.325	-0.185182	0.118393	-1.56326	0.117991	0.394001
GTSE1	G2 and S-phase expressed 1 [Source:HGNC Symbol;Acc:HGNC:13698]	51512	Q9NYZ3	ENSG00000075218	protein_coding	357.731	0.0644994	0.0997426	0.64664	0.517865	0.82524
SEMA3C	semaphorin 3C [Source:HGNC Symbol;Acc:HGNC:10725]	10512	Q99985	ENSG00000075223	protein_coding	1744.83	0.440877	0.0563752	7.8205	5.26149e-15	6.02527e-13
TTC38	tetratricopeptide repeat domain 38 [Source:HGNC Symbol;Acc:HGNC:26082]	55020		ENSG00000075234	protein_coding	696.33	0.271319	0.0793504	3.41942	0.000627545	0.00806101
ACAT1	acetyl-CoA acetyltransferase 1 [Source:HGNC Symbol;Acc:HGNC:93]	38	P24752	ENSG00000075239	protein_coding	1869.33	-0.0314663	0.0558551	-0.563353	0.573195	0.855751
GRAMD4	GRAM domain containing 4 [Source:HGNC Symbol;Acc:HGNC:29113]	23151		ENSG00000075240	protein_coding	301.736	0.152296	0.101423	1.50183	0.133142	0.424218
CELSR1	cadherin EGF LAG seven-pass G-type receptor 1 [Source:HGNC Symbol;Acc:HGNC:1850]	9620	Q9NYQ6	ENSG00000075275	protein_coding	928.366	-0.141961	0.0872353	-1.62714	0.103707	0.363994
WNT8B	Wnt family member 8B [Source:HGNC Symbol;Acc:HGNC:12789]	7479	Q93098	ENSG00000075290	protein_coding	1.55465	0.0574731	0.0616346	0.946182	0.344056
ZNF638	zinc finger protein 638 [Source:HGNC Symbol;Acc:HGNC:17894]	27332		ENSG00000075292	protein_coding	4536.26	0.00963715	0.0440668	0.218694	0.826889	0.951552
SLC25A40	solute carrier family 25 member 40 [Source:HGNC Symbol;Acc:HGNC:29680]	55972	Q8TBP6	ENSG00000075303	protein_coding	282.095	-0.0836394	0.112548	-0.743023	0.457468	0.78984
TIMM21	translocase of inner mitochondrial membrane 21 [Source:HGNC Symbol;Acc:HGNC:25010]	29090	Q9BVV7	ENSG00000075336	protein_coding	348.747	-0.172588	0.0979104	-1.76211	0.0780511	0.305662
ADD2	adducin 2 [Source:HGNC Symbol;Acc:HGNC:244]	119	P35612	ENSG00000075340	protein_coding	0.367895	0.00450907	0.0302669	0.148979	0.88157
FGF4	fibroblast growth factor 4 [Source:HGNC Symbol;Acc:HGNC:3682]	2249	P08620	ENSG00000075388	protein_coding	0.1266	-0.00283079	0.0243034	-0.116473	0.907278
RASAL2	RAS protein activator like 2 [Source:HGNC Symbol;Acc:HGNC:9874]	9462	Q9UJF2	ENSG00000075391	protein_coding	1423.24	0.170386	0.0653735	2.60642	0.00914936	0.0674648
VPS9D1	VPS9 domain containing 1 [Source:HGNC Symbol;Acc:HGNC:13526]	9605		ENSG00000075399	protein_coding	276.039	-0.190941	0.108802	-1.75412	0.0794106	0.309465
ZNF37A	zinc finger protein 37A [Source:HGNC Symbol;Acc:HGNC:13102]	7587		ENSG00000075407	protein_coding	622.933	0.0830657	0.0843305	0.985058	0.324596	0.683734
MARK3	microtubule affinity regulating kinase 3 [Source:HGNC Symbol;Acc:HGNC:6897]	4140		ENSG00000075413	protein_coding	1164.66	0.146881	0.0651783	2.25361	0.0242207	0.139047
SLC25A3	solute carrier family 25 member 3 [Source:HGNC Symbol;Acc:HGNC:10989]	5250	Q00325	ENSG00000075415	protein_coding	12754.4	-0.0533286	0.0439765	-1.21266	0.22526	0.568761
FNDC3B	fibronectin type III domain containing 3B [Source:HGNC Symbol;Acc:HGNC:24670]	64778	Q53EP0	ENSG00000075420	protein_coding	3992.02	0.0229273	0.0521506	0.43964	0.660198	0.894523
FOSL2	FOS like 2, AP-1 transcription factor subunit [Source:HGNC Symbol;Acc:HGNC:3798]	2355	P15408	ENSG00000075426	protein_coding	5202.08	-0.236732	0.0560058	-4.22683	2.37004e-05	0.000483417
CACNG5	calcium voltage-gated channel auxiliary subunit gamma 5 [Source:HGNC Symbol;Acc:HGNC:1409]	27091	Q9UF02	ENSG00000075429	protein_coding	0
CACNG4	calcium voltage-gated channel auxiliary subunit gamma 4 [Source:HGNC Symbol;Acc:HGNC:1408]	27092	Q9UBN1	ENSG00000075461	protein_coding	0.215196	0.00862596	0.0243034	0.354932	0.722641
FRYL	FRY like transcription coactivator [Source:HGNC Symbol;Acc:HGNC:29127]	285527	O94915	ENSG00000075539	protein_coding	3625.87	-0.0943994	0.0479694	-1.96789	0.0490811	0.225709
TMEM131	transmembrane protein 131 [Source:HGNC Symbol;Acc:HGNC:30366]	23505	Q92545	ENSG00000075568	protein_coding	392.447	-0.11306	0.0935385	-1.2085	0.226853	0.570422
FSCN1	fascin actin-bundling protein 1 [Source:HGNC Symbol;Acc:HGNC:11148]	6624	Q16658	ENSG00000075618	protein_coding	2107.18	0.333835	0.057744	5.78145	7.40589e-09	3.20531e-07
ACTB	actin beta [Source:HGNC Symbol;Acc:HGNC:132]	60	P60709	ENSG00000075624	protein_coding	16320.1	-0.000986348	0.0415735	-0.0237257	0.981071	0.995042
MOCOS	molybdenum cofactor sulfurase [Source:HGNC Symbol;Acc:HGNC:18234]	55034	Q96EN8	ENSG00000075643	protein_coding	567.463	-0.00533591	0.0883488	-0.0603927	0.951843	0.987135
PLD1	phospholipase D1 [Source:HGNC Symbol;Acc:HGNC:9067]	5337	Q13393	ENSG00000075651	protein_coding	4143.61	-0.282901	0.0533482	-5.30271	1.14094e-07	3.95067e-06
ATP12A	ATPase H+/K+ transporting non-gastric alpha2 subunit [Source:HGNC Symbol;Acc:HGNC:13816]	479	P54707	ENSG00000075673	protein_coding	0.510566	-0.00619985	0.0357947	-0.169948	0.865051
WDR62	WD repeat domain 62 [Source:HGNC Symbol;Acc:HGNC:24502]	284403	O43379	ENSG00000075702	protein_coding	302.431	0.0592216	0.104307	0.567774	0.570188	0.855144
DLG1	discs large MAGUK scaffold protein 1 [Source:HGNC Symbol;Acc:HGNC:2900]	1739	Q12959	ENSG00000075711	protein_coding	2093.81	0.106663	0.0528085	2.01983	0.0434009	0.208679
RAB7A	RAB7A, member RAS oncogene family [Source:HGNC Symbol;Acc:HGNC:9788]	7879	P51149	ENSG00000075785	protein_coding	648.386	-0.127003	0.0968065	-1.3118	0.189588	0.517089
BCAP29	B cell receptor associated protein 29 [Source:HGNC Symbol;Acc:HGNC:24131]	55973	Q9UHQ4	ENSG00000075790	protein_coding	909.073	0.199279	0.0709711	2.80809	0.00498371	0.0423881
SEC31B	SEC31 homolog B, COPII coat complex component [Source:HGNC Symbol;Acc:HGNC:23197]	25956	Q9NQW1	ENSG00000075826	protein_coding	192.974	-0.369353	0.126022	-2.9278	0.00341368	0.0314796
SART3	squamous cell carcinoma antigen recognized by T cells 3 [Source:HGNC Symbol;Acc:HGNC:16860]	9733	Q15020	ENSG00000075856	protein_coding	2092.88	0.0472765	0.0533861	0.885565	0.375852	0.729321
ARHGAP15	Rho GTPase activating protein 15 [Source:HGNC Symbol;Acc:HGNC:21030]	55843		ENSG00000075884	protein_coding	1.30917	0.0161076	0.0542509	0.295691	0.767466
TUBA3D	tubulin alpha 3d [Source:HGNC Symbol;Acc:HGNC:24071]	113457	Q13748	ENSG00000075886	protein_coding	4.16396	0.0175381	0.0936708	0.187688	0.851121
PAX2	paired box 2 [Source:HGNC Symbol;Acc:HGNC:8616]	5076	Q02962	ENSG00000075891	protein_coding	0.571932	-0.0147425	0.0376152	-0.359453	0.719256
EXOSC7	exosome component 7 [Source:HGNC Symbol;Acc:HGNC:28112]	23016	Q15024	ENSG00000075914	protein_coding	456.561	-0.0466421	0.0903931	-0.515986	0.605864	0.871147
KIFAP3	kinesin associated protein 3 [Source:HGNC Symbol;Acc:HGNC:17060]	22920	Q92845	ENSG00000075945	protein_coding	752.309	-0.0264075	0.0762098	-0.346512	0.728958	0.920577
MKRN2	makorin ring finger protein 2 [Source:HGNC Symbol;Acc:HGNC:7113]	23609	Q9H000	ENSG00000075975	protein_coding	2702.05	-0.0572138	0.0498792	-1.14703	0.251369	0.602361
MCM6	minichromosome maintenance complex component 6 [Source:HGNC Symbol;Acc:HGNC:6949]	4175	Q14566	ENSG00000076003	protein_coding	1570.29	0.174163	0.0677929	2.56909	0.0101966	0.07295
REXO2	RNA exonuclease 2 [Source:HGNC Symbol;Acc:HGNC:17851]	25996	Q9Y3B8	ENSG00000076043	protein_coding	2138.69	-0.278239	0.0612561	-4.54188	5.57541e-06	0.000132367
RBM7	RNA binding motif protein 7 [Source:HGNC Symbol;Acc:HGNC:9904]	10179	Q9Y580	ENSG00000076053	protein_coding	435.872	0.110577	0.0911208	1.21356	0.224916	0.568242
RBMS2	RNA binding motif single stranded interacting protein 2 [Source:HGNC Symbol;Acc:HGNC:9909]	5939	Q15434	ENSG00000076067	protein_coding	503.288	0.102169	0.0872936	1.17042	0.24183	0.590702
BAZ2A	bromodomain adjacent to zinc finger domain 2A [Source:HGNC Symbol;Acc:HGNC:962]	11176		ENSG00000076108	protein_coding	549.3	0.123675	0.089245	1.38591	0.165773	0.479609
PTPN23	protein tyrosine phosphatase, non-receptor type 23 [Source:HGNC Symbol;Acc:HGNC:14406]	25930		ENSG00000076201	protein_coding	113.247	-0.0655497	0.139247	-0.470645	0.637895	0.885884
MLH1	mutL homolog 1 [Source:HGNC Symbol;Acc:HGNC:7127]	4292	P40692	ENSG00000076242	protein_coding	919.54	0.0580675	0.0713977	0.813322	0.416034	0.762402
UNG	uracil DNA glycosylase [Source:HGNC Symbol;Acc:HGNC:12572]	7374	P13051	ENSG00000076248	protein_coding	1037.21	0.0439769	0.0679148	0.647535	0.517286	0.824617
FMO4	flavin containing monooxygenase 4 [Source:HGNC Symbol;Acc:HGNC:3772]	2329	P31512	ENSG00000076258	protein_coding	23.1395	-0.0230888	0.153488	-0.150437	0.88042	0.968108
KLHL20	kelch like family member 20 [Source:HGNC Symbol;Acc:HGNC:25056]	27252	Q9Y2M5	ENSG00000076321	protein_coding	476.1	0.156266	0.0902778	1.7311	0.0834341	0.318347
RGS11	regulator of G protein signaling 11 [Source:HGNC Symbol;Acc:HGNC:9993]	8786	O94810	ENSG00000076344	protein_coding	1.14003	0.00304887	0.0558587	0.0544944	0.956541
SLC46A1	solute carrier family 46 member 1 [Source:HGNC Symbol;Acc:HGNC:30521]	113235	Q96NT5	ENSG00000076351	protein_coding	108.059	-0.103216	0.139949	-0.7374	0.460879	0.791869
PLXNA2	plexin A2 [Source:HGNC Symbol;Acc:HGNC:9100]	5362	O75051	ENSG00000076356	protein_coding	164.558	-0.434022	0.127379	-3.40015	0.000673496	0.00855096
SPAG5	sperm associated antigen 5 [Source:HGNC Symbol;Acc:HGNC:13452]	10615	Q96R06	ENSG00000076382	protein_coding	1660.01	0.0326111	0.0578579	0.563641	0.572998	0.855737
ANKRD13A	ankyrin repeat domain 13A [Source:HGNC Symbol;Acc:HGNC:21268]	88455		ENSG00000076513	protein_coding	1500.25	-0.00235149	0.0591294	-0.0397691	0.968277	0.991445
TPD52	tumor protein D52 [Source:HGNC Symbol;Acc:HGNC:12005]	7163	P55327	ENSG00000076554	protein_coding	230.007	-0.0458408	0.11622	-0.394449	0.69325	0.905909
ACACB	acetyl-CoA carboxylase beta [Source:HGNC Symbol;Acc:HGNC:85]	32	O00763	ENSG00000076555	protein_coding	34.71	-0.189915	0.157634	-1.2028	0.229052	0.573892
TRAF4	TNF receptor associated factor 4 [Source:HGNC Symbol;Acc:HGNC:12034]	9618	Q9BUZ4	ENSG00000076604	protein_coding	920.714	0.141234	0.0693719	2.03599	0.0417517	0.203316
PAG1	phosphoprotein membrane anchor with glycosphingolipid microdomains 1 [Source:HGNC Symbol;Acc:HGNC:30043]	55824	Q9NWQ8	ENSG00000076641	protein_coding	9.30419	-0.0686253	0.125417	-0.547955	0.583723	0.859794
GPATCH1	G-patch domain containing 1 [Source:HGNC Symbol;Acc:HGNC:24658]	55094	Q9BRR8	ENSG00000076650	protein_coding	237.376	-0.0263781	0.118065	-0.223364	0.823252	0.950885
ICAM3	intercellular adhesion molecule 3 [Source:HGNC Symbol;Acc:HGNC:5346]	3385	P32942	ENSG00000076662	protein_coding	0.1266	-0.00283079	0.0243034	-0.116473	0.907278
NT5C2	5'-nucleotidase, cytosolic II [Source:HGNC Symbol;Acc:HGNC:8022]	22978	P49902	ENSG00000076685	protein_coding	1269.8	-0.207519	0.064472	-3.2184	0.0012891	0.0146095
MCAM	melanoma cell adhesion molecule [Source:HGNC Symbol;Acc:HGNC:6934]	4162	P43121	ENSG00000076706	protein_coding	799.093	0.258778	0.0749523	3.45286	0.000554685	0.00725812
GPC4	glypican 4 [Source:HGNC Symbol;Acc:HGNC:4452]	2239	O75487	ENSG00000076716	protein_coding	593.654	-0.342668	0.0902325	-3.79601	0.000147042	0.00235448
MBNL3	muscleblind like splicing regulator 3 [Source:HGNC Symbol;Acc:HGNC:20564]	55796		ENSG00000076770	protein_coding	2.66102	0.00567504	0.0793712	0.0716483	0.942882
CAMSAP3	calmodulin regulated spectrin associated protein family member 3 [Source:HGNC Symbol;Acc:HGNC:29307]	57662	Q9P1Y5	ENSG00000076826	protein_coding	149.441	0.104615	0.130848	0.799603	0.423941	0.768095
RAP1GAP	RAP1 GTPase activating protein [Source:HGNC Symbol;Acc:HGNC:9858]	5909		ENSG00000076864	protein_coding	1.4297	0.038828	0.0565052	0.702784	0.48219
XAB2	XPA binding protein 2 [Source:HGNC Symbol;Acc:HGNC:14089]	56949	Q9HCS7	ENSG00000076924	protein_coding	282.679	-0.0846446	0.108892	-0.777077	0.437113	0.778082
ARHGEF1	Rho guanine nucleotide exchange factor 1 [Source:HGNC Symbol;Acc:HGNC:681]	9138	Q92888	ENSG00000076928	protein_coding	1282.35	-0.114281	0.0661148	-1.72841	0.0839149	0.319508
STXBP2	syntaxin binding protein 2 [Source:HGNC Symbol;Acc:HGNC:11445]	6813		ENSG00000076944	protein_coding	417.074	-0.242708	0.0937468	-2.58793	0.00965556	0.0700808
MAP2K7	mitogen-activated protein kinase kinase 7 [Source:HGNC Symbol;Acc:HGNC:6847]	5609	O14733	ENSG00000076984	protein_coding	568.776	-0.0405627	0.0839429	-0.483186	0.628964	0.882352
NMRK2	nicotinamide riboside kinase 2 [Source:HGNC Symbol;Acc:HGNC:17871]	27231	Q9NPI5	ENSG00000077009	protein_coding	0.502864	0.0183366	0.0357245	0.488751	0.625018
DGKD	diacylglycerol kinase delta [Source:HGNC Symbol;Acc:HGNC:2851]	8527	Q16760	ENSG00000077044	protein_coding	645.865	0.107275	0.0845028	1.26953	0.204253	0.54002
CTTNBP2	cortactin binding protein 2 [Source:HGNC Symbol;Acc:HGNC:15679]	83992	Q8WZ74	ENSG00000077063	protein_coding	115.666	-0.210369	0.137846	-1.52455	0.127372	0.412283
ACTL6B	actin like 6B [Source:HGNC Symbol;Acc:HGNC:160]	51412	O94805	ENSG00000077080	protein_coding	0
RARB	retinoic acid receptor beta [Source:HGNC Symbol;Acc:HGNC:9865]	5915		ENSG00000077092	protein_coding	31.9742	0.970487	0.156477	6.12781	8.90957e-10	4.67379e-08
TOP2B	DNA topoisomerase II beta [Source:HGNC Symbol;Acc:HGNC:11990]	7155		ENSG00000077097	protein_coding	6389.72	0.0108027	0.0416711	0.259237	0.795452	0.942605
TM9SF3	transmembrane 9 superfamily member 3 [Source:HGNC Symbol;Acc:HGNC:21529]	56889	Q9HD45	ENSG00000077147	protein_coding	6660.43	-0.00450969	0.0438892	-0.102752	0.91816	0.97936
NFKB2	nuclear factor kappa B subunit 2 [Source:HGNC Symbol;Acc:HGNC:7795]	4791		ENSG00000077150	protein_coding	305.778	0.189503	0.104282	1.81746	0.069146	0.282732
UBE2T	ubiquitin conjugating enzyme E2 T [Source:HGNC Symbol;Acc:HGNC:25009]	29089		ENSG00000077152	protein_coding	669.608	-0.0232248	0.0805352	-0.288381	0.773055	0.934891
PPP1R12B	protein phosphatase 1 regulatory subunit 12B [Source:HGNC Symbol;Acc:HGNC:7619]	4660		ENSG00000077157	protein_coding	295.025	0.00467916	0.106474	0.0439501	0.964944	0.990483
DNAJC10	DnaJ heat shock protein family (Hsp40) member C10 [Source:HGNC Symbol;Acc:HGNC:24637]	54431	Q8IXB1	ENSG00000077232	protein_coding	6389.3	0.145537	0.0423518	3.43641	0.000589478	0.00761108
GTF3C1	general transcription factor IIIC subunit 1 [Source:HGNC Symbol;Acc:HGNC:4664]	2975	Q12789	ENSG00000077235	protein_coding	3495.76	0.067628	0.0503983	1.34188	0.179635	0.501298
IL4R	interleukin 4 receptor [Source:HGNC Symbol;Acc:HGNC:6015]	3566		ENSG00000077238	protein_coding	678.221	-0.184257	0.0787055	-2.34071	0.0192473	0.11779
USP33	ubiquitin specific peptidase 33 [Source:HGNC Symbol;Acc:HGNC:20059]	23032	Q8TEY7	ENSG00000077254	protein_coding	2609.54	0.0161688	0.0511948	0.31583	0.752132	0.928068
PAK3	p21 (RAC1) activated kinase 3 [Source:HGNC Symbol;Acc:HGNC:8592]	5063	O75914	ENSG00000077264	protein_coding	404.513	0.177083	0.0965061	1.83501	0.0665041	0.274945
CAPN6	calpain 6 [Source:HGNC Symbol;Acc:HGNC:1483]	827	Q9Y6Q1	ENSG00000077274	protein_coding	0.29537	-0.0113483	0.0279572	-0.411234	0.680901
DCX	doublecortin [Source:HGNC Symbol;Acc:HGNC:2714]	1641	O43602	ENSG00000077279	protein_coding	0.215196	0.00862596	0.0243034	0.354932	0.722641
SNRPA	small nuclear ribonucleoprotein polypeptide A [Source:HGNC Symbol;Acc:HGNC:11151]	6626		ENSG00000077312	protein_coding	740.256	0.0515854	0.0752036	0.685948	0.492746	0.812527
SPAG6	sperm associated antigen 6 [Source:HGNC Symbol;Acc:HGNC:11215]	9576	O75602	ENSG00000077327	protein_coding	0.706607	-0.0188158	0.038271	-0.50098	0.616385
EXOSC5	exosome component 5 [Source:HGNC Symbol;Acc:HGNC:24662]	56915	Q9NQT4	ENSG00000077348	protein_coding	338.301	-0.05384	0.0993822	-0.54172	0.588011	0.861633
DYNC1I2	dynein cytoplasmic 1 intermediate chain 2 [Source:HGNC Symbol;Acc:HGNC:2964]	1781		ENSG00000077380	protein_coding	2473.17	-0.0870381	0.0497832	-1.74831	0.0804112	0.311356
APBB1IP	amyloid beta precursor protein binding family B member 1 interacting protein [Source:HGNC Symbol;Acc:HGNC:17379]	54518	Q7Z5R6	ENSG00000077420	protein_coding	2.08439	0.0530744	0.0720737	0.742359	0.45787
LRCH4	leucine rich repeats and calponin homology domain containing 4 [Source:HGNC Symbol;Acc:HGNC:6691]	4034		ENSG00000077454	protein_coding	50.6649	-0.0556811	0.156345	-0.356148	0.72173	0.917532
FAM76B	family with sequence similarity 76 member B [Source:HGNC Symbol;Acc:HGNC:28492]	143684	Q5HYJ3	ENSG00000077458	protein_coding	600.191	0.00503335	0.080039	0.0628848	0.949858	0.986128
SIRT6	sirtuin 6 [Source:HGNC Symbol;Acc:HGNC:14934]	51548		ENSG00000077463	protein_coding	181.037	-0.0457971	0.122181	-0.374826	0.70779	0.913111
TYR	tyrosinase [Source:HGNC Symbol;Acc:HGNC:12442]	7299	P14679	ENSG00000077498	protein_coding	0.428014	-0.0198713	0.0294915	-0.604151	0.545743
POLD3	DNA polymerase delta 3, accessory subunit [Source:HGNC Symbol;Acc:HGNC:20932]	10714		ENSG00000077514	protein_coding	2035.78	0.225487	0.0535261	4.21275	2.52278e-05	0.000510412
ACTN2	actinin alpha 2 [Source:HGNC Symbol;Acc:HGNC:164]	88	P35609	ENSG00000077522	protein_coding	4.52559	-0.0379101	0.0974333	-0.391136	0.695696	0.907009
CAPZB	capping actin protein of muscle Z-line beta subunit [Source:HGNC Symbol;Acc:HGNC:1491]	832		ENSG00000077549	protein_coding	1442.17	0.0103978	0.0600751	0.173081	0.862587	0.96172
GPR137B	G protein-coupled receptor 137B [Source:HGNC Symbol;Acc:HGNC:11862]	7107		ENSG00000077585	protein_coding	396.65	-0.071147	0.100322	-0.709179	0.478213	0.803122
NAALAD2	N-acetylated alpha-linked acidic dipeptidase 2 [Source:HGNC Symbol;Acc:HGNC:14526]	10003		ENSG00000077616	protein_coding	37.9401	0.109465	0.157922	0.692881	0.488384	0.810153
JADE1	jade family PHD finger 1 [Source:HGNC Symbol;Acc:HGNC:30027]	79960	Q6IE81	ENSG00000077684	protein_coding	1440.31	-0.0614681	0.0582236	-1.0557	0.291105	0.650176
SLC25A43	solute carrier family 25 member 43 [Source:HGNC Symbol;Acc:HGNC:30557]	203427	Q8WUT9	ENSG00000077713	protein_coding	364.613	0.184432	0.0980421	1.88151	0.0599026	0.256866
UBE2A	ubiquitin conjugating enzyme E2 A [Source:HGNC Symbol;Acc:HGNC:12472]	7319	P49459	ENSG00000077721	protein_coding	1171.32	0.017363	0.0649228	0.267443	0.789128	0.93999
FGFR1	fibroblast growth factor receptor 1 [Source:HGNC Symbol;Acc:HGNC:3688]	2260	P11362	ENSG00000077782	protein_coding	917.63	0.12472	0.0697141	1.78909	0.0736003	0.295092
FKBP6	FK506 binding protein 6 [Source:HGNC Symbol;Acc:HGNC:3722]	8468	O75344	ENSG00000077800	protein_coding	0.693915	0.0315161	0.0404204	0.790939	0.42898
SMC1B	structural maintenance of chromosomes 1B [Source:HGNC Symbol;Acc:HGNC:11112]	27127	Q8NDV3	ENSG00000077935	protein_coding	1.49459	-0.0159324	0.0571665	-0.283772	0.776585
FBLN1	fibulin 1 [Source:HGNC Symbol;Acc:HGNC:3600]	2192		ENSG00000077942	protein_coding	3.5991	0.123655	0.0859093	1.48606	0.137264
ITGA8	integrin subunit alpha 8 [Source:HGNC Symbol;Acc:HGNC:6144]	8516	P53708	ENSG00000077943	protein_coding	0.200205	0.00862596	0.0243034	0.354932	0.722641
CST7	cystatin F [Source:HGNC Symbol;Acc:HGNC:2479]	8530	O76096	ENSG00000077984	protein_coding	2.54185	0.144745	0.074639	2.04287	0.0410649
MAP2	microtubule associated protein 2 [Source:HGNC Symbol;Acc:HGNC:6839]	4133	P11137	ENSG00000078018	protein_coding	330.984	0.342982	0.115969	2.95759	0.00310053	0.0293805
PIAS2	protein inhibitor of activated STAT 2 [Source:HGNC Symbol;Acc:HGNC:17311]	9063	O75928	ENSG00000078043	protein_coding	569.352	-0.124887	0.0823944	-1.51555	0.129634	0.41729
AMPH	amphiphysin [Source:HGNC Symbol;Acc:HGNC:471]	273	P49418	ENSG00000078053	protein_coding	7.37133	0.140676	0.1159	1.21365	0.224882	0.568242
ARAF	A-Raf proto-oncogene, serine/threonine kinase [Source:HGNC Symbol;Acc:HGNC:646]	369	P10398	ENSG00000078061	protein_coding	503.498	-0.0436175	0.0871398	-0.500514	0.616713	0.876601
MCCC1	methylcrotonoyl-CoA carboxylase 1 [Source:HGNC Symbol;Acc:HGNC:6936]	56922	Q96RQ3	ENSG00000078070	protein_coding	1532.68	-0.321305	0.0607944	-5.28427	1.2621e-07	4.31901e-06
LAMP3	lysosomal associated membrane protein 3 [Source:HGNC Symbol;Acc:HGNC:14582]	27074	Q9UQV4	ENSG00000078081	protein_coding	0.600768	-0.0359522	0.0360054	-0.920741	0.357186
FAP	fibroblast activation protein alpha [Source:HGNC Symbol;Acc:HGNC:3590]	2191		ENSG00000078098	protein_coding	3.83815	0.00744094	0.0912824	0.0817594	0.934838
NEBL	nebulette [Source:HGNC Symbol;Acc:HGNC:16932]	10529	O76041	ENSG00000078114	protein_coding	451.801	0.00557516	0.0918815	0.0606746	0.951618	0.987131
ACER3	alkaline ceramidase 3 [Source:HGNC Symbol;Acc:HGNC:16066]	55331		ENSG00000078124	protein_coding	1304.68	0.0597421	0.0660221	0.904918	0.365509	0.720374
UBE2K	ubiquitin conjugating enzyme E2 K [Source:HGNC Symbol;Acc:HGNC:4914]	3093	P61086	ENSG00000078140	protein_coding	1465.91	0.0861488	0.0677026	1.27249	0.203198	0.537754
PIK3C3	phosphatidylinositol 3-kinase catalytic subunit type 3 [Source:HGNC Symbol;Acc:HGNC:8974]	5289	Q8NEB9	ENSG00000078142	protein_coding	1249.96	-0.155237	0.0681984	-2.27611	0.0228394	0.133523
N4BP2	NEDD4 binding protein 2 [Source:HGNC Symbol;Acc:HGNC:29851]	55728	Q86UW6	ENSG00000078177	protein_coding	2228.01	0.0844613	0.0528648	1.5977	0.110109	0.377761
TIGAR	TP53 induced glycolysis regulatory phosphatase [Source:HGNC Symbol;Acc:HGNC:1185]	57103		ENSG00000078237	protein_coding	512.199	0.118362	0.0894118	1.32383	0.185559	0.511156
TULP3	tubby like protein 3 [Source:HGNC Symbol;Acc:HGNC:12425]	7289	O75386	ENSG00000078246	protein_coding	1608.06	-0.147444	0.0622903	-2.36696	0.017935	0.111591
SYNJ2	synaptojanin 2 [Source:HGNC Symbol;Acc:HGNC:11504]	8871	O15056	ENSG00000078269	protein_coding	295.158	1.00175	0.105789	9.44881	3.42713e-21	7.50584e-19
ADCY2	adenylate cyclase 2 [Source:HGNC Symbol;Acc:HGNC:233]	108	Q08462	ENSG00000078295	protein_coding	1.67663	0.10466	0.0619313	1.89524	0.0580603
PPP2R5C	protein phosphatase 2 regulatory subunit B'gamma [Source:HGNC Symbol;Acc:HGNC:9311]	5527		ENSG00000078304	protein_coding	2394.12	0.0520941	0.0534671	0.974322	0.329897	0.689129
				ENSG00000078319		63.1037	-0.0240346	0.153065	-0.156948	0.875286	0.966466
RBFOX1	RNA binding fox-1 homolog 1 [Source:HGNC Symbol;Acc:HGNC:18222]	54715		ENSG00000078328	protein_coding	0.285343	-0.00939388	0.0254535	-0.362042	0.717321
GNB1	G protein subunit beta 1 [Source:HGNC Symbol;Acc:HGNC:4396]	2782	P62873	ENSG00000078369	protein_coding	2339.48	-0.0776034	0.0595565	-1.303	0.192575	0.521031
HOXA9	homeobox A9 [Source:HGNC Symbol;Acc:HGNC:5109]	3205	P31269	ENSG00000078399	protein_coding	268.108	-0.295506	0.107056	-2.758	0.00581559	0.0477483
EDN1	endothelin 1 [Source:HGNC Symbol;Acc:HGNC:3176]	1906	P05305	ENSG00000078401	protein_coding	169.852	-0.351913	0.13527	-2.59981	0.00932745	0.0683792
MLLT10	MLLT10, histone lysine methyltransferase DOT1L cofactor [Source:HGNC Symbol;Acc:HGNC:16063]	8028	P55197	ENSG00000078403	protein_coding	665.152	0.0135211	0.0769657	0.175675	0.86055	0.961222
ZCWPW1	zinc finger CW-type and PWWP domain containing 1 [Source:HGNC Symbol;Acc:HGNC:23486]	55063	Q9H0M4	ENSG00000078487	protein_coding	17.2558	-0.0270217	0.147434	-0.183101	0.854719	0.960086
ADCYAP1R1	ADCYAP receptor type I [Source:HGNC Symbol;Acc:HGNC:242]	117	P41586	ENSG00000078549	protein_coding	3.07661	0.185318	0.0822724	2.35789	0.0183791
FGF20	fibroblast growth factor 20 [Source:HGNC Symbol;Acc:HGNC:3677]	26281	Q9NP95	ENSG00000078579	protein_coding	6.32875	0.0208201	0.110045	0.188723	0.85031	0.958518
P2RY10	P2Y receptor family member 10 [Source:HGNC Symbol;Acc:HGNC:19906]	27334	O00398	ENSG00000078589	protein_coding	0.376264	0.0227081	0.0305146	0.719179	0.47203
ITM2A	integral membrane protein 2A [Source:HGNC Symbol;Acc:HGNC:6173]	9452	O43736	ENSG00000078596	protein_coding	14.991	0.0305837	0.139545	0.218888	0.826737	0.951549
NRDC	nardilysin convertase [Source:HGNC Symbol;Acc:HGNC:7995]	4898		ENSG00000078618	protein_coding	2186.05	-0.0118732	0.0690604	-0.171923	0.863498	0.961789
VDAC3	voltage dependent anion channel 3 [Source:HGNC Symbol;Acc:HGNC:12674]	7419		ENSG00000078668	protein_coding	1767.37	-0.0669423	0.0552149	-1.21237	0.22537	0.568814
PCM1	pericentriolar material 1 [Source:HGNC Symbol;Acc:HGNC:8727]	5108	Q15154	ENSG00000078674	protein_coding	2764.31	-0.0350048	0.0495462	-0.706503	0.479876	0.804681
TNRC6C	trinucleotide repeat containing 6C [Source:HGNC Symbol;Acc:HGNC:29318]	57690		ENSG00000078687	protein_coding	0.391255	0.0232577	0.0308782	0.742954	0.45751
CBFA2T2	CBFA2/RUNX1 translocation partner 2 [Source:HGNC Symbol;Acc:HGNC:1536]	9139	O43439	ENSG00000078699	protein_coding	259.649	-0.0345745	0.117045	-0.295415	0.767677	0.933232
BRINP1	BMP/retinoic acid inducible neural specific 1 [Source:HGNC Symbol;Acc:HGNC:2687]	1620	O60477	ENSG00000078725	protein_coding	940.491	-0.534311	0.0767877	-6.9546	3.53553e-12	2.64726e-10
ITCH	itchy E3 ubiquitin protein ligase [Source:HGNC Symbol;Acc:HGNC:13890]	83737	Q96J02	ENSG00000078747	protein_coding	6161.67	0.00651306	0.0438566	0.148508	0.881942	0.968445
PKD2L2	polycystin 2 like 2, transient receptor potential cation channel [Source:HGNC Symbol;Acc:HGNC:9012]	27039		ENSG00000078795	protein_coding	5.77994	0.08599	0.105253	0.819318	0.412605	0.76048
TP53INP2	tumor protein p53 inducible nuclear protein 2 [Source:HGNC Symbol;Acc:HGNC:16104]	58476	Q8IXH6	ENSG00000078804	protein_coding	95.6342	0.123884	0.149231	0.830815	0.406078	0.754717
SDF4	stromal cell derived factor 4 [Source:HGNC Symbol;Acc:HGNC:24188]	51150	Q9BRK5	ENSG00000078808	protein_coding	3363.55	-0.0920672	0.0459777	-2.00241	0.045241	0.214408
MYH7B	myosin heavy chain 7B [Source:HGNC Symbol;Acc:HGNC:15906]	57644	A7E2Y1	ENSG00000078814	protein_coding	30.3359	-0.0243143	0.156806	-0.154858	0.876933	0.966582
BPIFB2	BPI fold containing family B member 2 [Source:HGNC Symbol;Acc:HGNC:16177]	80341	Q8N4F0	ENSG00000078898	protein_coding	0
TP73	tumor protein p73 [Source:HGNC Symbol;Acc:HGNC:12003]	7161	O15350	ENSG00000078900	protein_coding	6.99251	0.286248	0.11356	2.56967	0.0101794	0.0728634
TOLLIP	toll interacting protein [Source:HGNC Symbol;Acc:HGNC:16476]	54472	Q9H0E2	ENSG00000078902	protein_coding	734.536	-0.239418	0.080688	-2.96663	0.00301087	0.0287328
UBE2D4	ubiquitin conjugating enzyme E2 D4 (putative) [Source:HGNC Symbol;Acc:HGNC:21647]	51619		ENSG00000078967	protein_coding	213.9	-0.0863725	0.115548	-0.747263	0.454905	0.788995
CLUL1	clusterin like 1 [Source:HGNC Symbol;Acc:HGNC:2096]	27098		ENSG00000079101	protein_coding	7.28089	0.0688699	0.117163	0.589482	0.555538	0.847189
RUNX1T1	RUNX1 translocation partner 1 [Source:HGNC Symbol;Acc:HGNC:1535]	862	Q06455	ENSG00000079102	protein_coding	10.3397	0.0413099	0.129938	0.318475	0.750125	0.927846
CDH17	cadherin 17 [Source:HGNC Symbol;Acc:HGNC:1756]	1015	Q12864	ENSG00000079112	protein_coding	30.1118	0.0224858	0.15693	0.143312	0.886043	0.969875
THOC1	THO complex 1 [Source:HGNC Symbol;Acc:HGNC:19070]	9984		ENSG00000079134	protein_coding	922.325	0.0561977	0.0689958	0.81452	0.415347	0.762369
FKBP7	FK506 binding protein 7 [Source:HGNC Symbol;Acc:HGNC:3723]	51661	Q9Y680	ENSG00000079150	protein_coding	155.422	-0.107077	0.132626	-0.807447	0.419409	0.765465
OSBPL6	oxysterol binding protein like 6 [Source:HGNC Symbol;Acc:HGNC:16388]	114880	Q9BZF3	ENSG00000079156	protein_coding	207.499	0.589038	0.117346	5.01715	5.24448e-07	1.59276e-05
SLC1A3	solute carrier family 1 member 3 [Source:HGNC Symbol;Acc:HGNC:10941]	6507	P43003	ENSG00000079215	protein_coding	48.3933	0.056404	0.156532	0.360389	0.718556	0.916005
XRCC5	X-ray repair cross complementing 5 [Source:HGNC Symbol;Acc:HGNC:12833]	7520	P13010	ENSG00000079246	protein_coding	14217.5	0.0990477	0.0433871	2.28289	0.022437	0.131875
LXN	latexin [Source:HGNC Symbol;Acc:HGNC:13347]	56925		ENSG00000079257	protein_coding	259.286	-0.231725	0.111037	-2.08581	0.0369958	0.187613
SP140	SP140 nuclear body protein [Source:HGNC Symbol;Acc:HGNC:17133]	11262		ENSG00000079263	protein_coding	22.2363	-0.00805911	0.15153	-0.0530985	0.957653	0.989097
MKNK1	MAP kinase interacting serine/threonine kinase 1 [Source:HGNC Symbol;Acc:HGNC:7110]	8569	Q9BUB5	ENSG00000079277	protein_coding	429.381	0.161607	0.0923762	1.74973	0.0801647	0.311055
TNS1	tensin 1 [Source:HGNC Symbol;Acc:HGNC:11973]	7145		ENSG00000079308	protein_coding	35.0343	-0.166433	0.157255	-1.05904	0.289584	0.648657
REXO1	RNA exonuclease 1 homolog [Source:HGNC Symbol;Acc:HGNC:24616]	57455	Q8N1G1	ENSG00000079313	protein_coding	126.904	0.0810296	0.138505	0.585039	0.558521	0.848509
SAR1A	secretion associated Ras related GTPase 1A [Source:HGNC Symbol;Acc:HGNC:10534]	56681	Q9NR31	ENSG00000079332	protein_coding	5179.07	0.047858	0.0455994	1.04954	0.293931	0.652803
CDC14A	cell division cycle 14A [Source:HGNC Symbol;Acc:HGNC:1718]	8556		ENSG00000079335	protein_coding	177.316	0.0452247	0.125079	0.361561	0.71768	0.915518
RAPGEF3	Rap guanine nucleotide exchange factor 3 [Source:HGNC Symbol;Acc:HGNC:16629]	10411	O95398	ENSG00000079337	protein_coding	230.082	0.280483	0.115472	2.42902	0.0151399	0.098065
CEACAM1	carcinoembryonic antigen related cell adhesion molecule 1 [Source:HGNC Symbol;Acc:HGNC:1814]	634	P13688	ENSG00000079385	protein_coding	2.02799	0.0591199	0.0673582	0.902441	0.366823
SENP1	SUMO1/sentrin specific peptidase 1 [Source:HGNC Symbol;Acc:HGNC:17927]	29843		ENSG00000079387	protein_coding	508.634	0.0915697	0.0867694	1.05533	0.291273	0.650176
DUSP13	dual specificity phosphatase 13 [Source:HGNC Symbol;Acc:HGNC:19681]	51207	Q9UII6	ENSG00000079393	protein_coding	2.50378	-0.0407096	0.0761817	-0.538193	0.590444
CIC	capicua transcriptional repressor [Source:HGNC Symbol;Acc:HGNC:14214]	23152		ENSG00000079432	protein_coding	386.296	-0.0151465	0.102874	-0.147235	0.882947	0.968523
LIPE	lipase E, hormone sensitive type [Source:HGNC Symbol;Acc:HGNC:6621]	3991	Q05469	ENSG00000079435	protein_coding	10.2505	0.234481	0.126635	1.85863	0.0630789	0.265866
FDFT1	farnesyl-diphosphate farnesyltransferase 1 [Source:HGNC Symbol;Acc:HGNC:3629]	2222		ENSG00000079459	protein_coding	1345.89	-0.112706	0.061662	-1.82771	0.0675938	0.278138
PAFAH1B3	platelet activating factor acetylhydrolase 1b catalytic subunit 3 [Source:HGNC Symbol;Acc:HGNC:8576]	5050	Q15102	ENSG00000079462	protein_coding	490.783	0.00238951	0.0889861	0.026854	0.978576	0.994411
OPHN1	oligophrenin 1 [Source:HGNC Symbol;Acc:HGNC:8148]	4983	O60890	ENSG00000079482	protein_coding	618.296	-0.00953423	0.0787642	-0.121049	0.903652	0.97483
AFM	afamin [Source:HGNC Symbol;Acc:HGNC:316]	173	P43652	ENSG00000079557	protein_coding	10.0327	-0.0482371	0.128969	-0.373357	0.708883	0.913174
KIF22	kinesin family member 22 [Source:HGNC Symbol;Acc:HGNC:6391]	3835	Q14807	ENSG00000079616	protein_coding	1496.82	0.0747687	0.0610243	1.22524	0.220485	0.562602
SCGN	secretagogin, EF-hand calcium binding protein [Source:HGNC Symbol;Acc:HGNC:16941]	10590	O76038	ENSG00000079689	protein_coding	6.45365	-0.0596003	0.108	-0.553119	0.580182	0.858416
CARMIL1	capping protein regulator and myosin 1 linker 1 [Source:HGNC Symbol;Acc:HGNC:21581]	55604		ENSG00000079691	protein_coding	4482.58	-0.169252	0.0522099	-3.24171	0.00118817	0.0136421
PGM1	phosphoglucomutase 1 [Source:HGNC Symbol;Acc:HGNC:8905]	5236	P36871	ENSG00000079739	protein_coding	6046.05	-0.0271053	0.0477668	-0.567452	0.570407	0.855144
DDX1	DEAD-box helicase 1 [Source:HGNC Symbol;Acc:HGNC:2734]	1653	Q92499	ENSG00000079785	protein_coding	1236.67	0.083518	0.0624027	1.33841	0.180761	0.502589
DNM2	dynamin 2 [Source:HGNC Symbol;Acc:HGNC:2974]	1785	P50570	ENSG00000079805	protein_coding	4152.87	-0.0614395	0.0458367	-1.34039	0.18012	0.501731
EPB41L2	erythrocyte membrane protein band 4.1 like 2 [Source:HGNC Symbol;Acc:HGNC:3379]	2037		ENSG00000079819	protein_coding	1905.35	0.0128699	0.131339	0.0979895	0.921941	0.980713
RIMS1	regulating synaptic membrane exocytosis 1 [Source:HGNC Symbol;Acc:HGNC:17282]	22999	Q86UR5	ENSG00000079841	protein_coding	116.71	0.18751	0.139116	1.34824	0.177581	0.497982
MOXD1	monooxygenase DBH like 1 [Source:HGNC Symbol;Acc:HGNC:21063]	26002	Q6UVY6	ENSG00000079931	protein_coding	181.291	-0.0206773	0.121429	-0.170275	0.864794	0.962388
STX7	syntaxin 7 [Source:HGNC Symbol;Acc:HGNC:11442]	8417	O15400	ENSG00000079950	protein_coding	1102.63	-0.409289	0.0713798	-5.73229	9.90854e-09	4.21377e-07
RABL2B	RAB, member of RAS oncogene family like 2B [Source:HGNC Symbol;Acc:HGNC:9800]	11158	Q9UNT1	ENSG00000079974	protein_coding	56.4476	-0.151423	0.155716	-0.971904	0.331098	0.690205
KEAP1	kelch like ECH associated protein 1 [Source:HGNC Symbol;Acc:HGNC:23177]	9817	Q14145	ENSG00000079999	protein_coding	1885.92	-0.0244076	0.0546947	-0.446248	0.655418	0.893015
DDX43	DEAD-box helicase 43 [Source:HGNC Symbol;Acc:HGNC:18677]	55510	Q9NXZ2	ENSG00000080007	protein_coding	1.4798	0.00551082	0.0569395	0.096702	0.922963
PTPRH	protein tyrosine phosphatase, receptor type H [Source:HGNC Symbol;Acc:HGNC:9672]	5794	Q9HD43	ENSG00000080031	protein_coding	60.4232	0.170052	0.153556	1.10771	0.267986	0.622069
DCT	dopachrome tautomerase [Source:HGNC Symbol;Acc:HGNC:2709]	1638	P40126	ENSG00000080166	protein_coding	4.18722	0.164103	0.0900373	1.89	0.0587585
SLC35C2	solute carrier family 35 member C2 [Source:HGNC Symbol;Acc:HGNC:17117]	51006	Q9NQQ7	ENSG00000080189	protein_coding	1051.46	-0.13749	0.0654127	-2.10174	0.0355764	0.182582
CRYBG3	crystallin beta-gamma domain containing 3 [Source:HGNC Symbol;Acc:HGNC:34427]	131544	Q68DQ2	ENSG00000080200	protein_coding	1304.68	-0.0118497	0.0637092	-0.185997	0.852447	0.959633
EPHA6	EPH receptor A6 [Source:HGNC Symbol;Acc:HGNC:19296]	285220		ENSG00000080224	protein_coding	95.6306	0.0591904	0.142951	0.414123	0.678784	0.900521
SCTR	secretin receptor [Source:HGNC Symbol;Acc:HGNC:10608]	6344	P47872	ENSG00000080293	protein_coding	34.0205	1.4122	0.155885	8.26346	1.41512e-16	2.0662e-14
RFX3	regulatory factor X3 [Source:HGNC Symbol;Acc:HGNC:9984]	5991	P48380	ENSG00000080298	protein_coding	151.618	-0.185836	0.13279	-1.39882	0.161866	0.473439
RIF1	replication timing regulatory factor 1 [Source:HGNC Symbol;Acc:HGNC:23207]	55183	Q5UIP0	ENSG00000080345	protein_coding	6945.25	-0.103849	0.0480865	-2.15963	0.0308016	0.165697
RAB21	RAB21, member RAS oncogene family [Source:HGNC Symbol;Acc:HGNC:18263]	23011	Q9UL25	ENSG00000080371	protein_coding	2004.55	0.0420672	0.0539321	0.780007	0.435387	0.777216
SLC4A4	solute carrier family 4 member 4 [Source:HGNC Symbol;Acc:HGNC:11030]	8671	Q9Y6R1	ENSG00000080493	protein_coding	2723.56	-0.537746	0.0661622	-8.12641	4.42206e-16	6.14912e-14
SMARCA2	SWI/SNF related, matrix associated, actin dependent regulator of chromatin, subfamily a, member 2 [Source:HGNC Symbol;Acc:HGNC:11098]	6595		ENSG00000080503	protein_coding	1599.9	0.0780564	0.059071	1.32141	0.186365	0.512514
RDH8	retinol dehydrogenase 8 (all-trans) [Source:HGNC Symbol;Acc:HGNC:14423]	50700		ENSG00000080511	protein_coding	0.215196	0.00862596	0.0243034	0.354932	0.722641
SESN1	sestrin 1 [Source:HGNC Symbol;Acc:HGNC:21595]	27244	Q9Y6P5	ENSG00000080546	protein_coding	503.989	0.18395	0.0907132	2.02787	0.0425732	0.206
MID2	midline 2 [Source:HGNC Symbol;Acc:HGNC:7096]	11043		ENSG00000080561	protein_coding	364.075	0.0298743	0.0987446	0.302578	0.762212	0.931421
PIH1D3	PIH1 domain containing 3 [Source:HGNC Symbol;Acc:HGNC:28570]	139212	Q9NQM4	ENSG00000080572	protein_coding	0.411943	-0.0221762	0.0315214	-0.633306	0.526534
COL5A3	collagen type V alpha 3 chain [Source:HGNC Symbol;Acc:HGNC:14864]	50509	P25940	ENSG00000080573	protein_coding	105.966	0.182226	0.141902	1.28503	0.19878	0.530676
SRCAP	Snf2 related CREBBP activator protein [Source:HGNC Symbol;Acc:HGNC:16974]	10847		ENSG00000080603	protein_coding	30.6223	0.12293	0.156364	0.786821	0.431387	0.77385
PUM3	pumilio RNA binding family member 3 [Source:HGNC Symbol;Acc:HGNC:29676]	9933		ENSG00000080608	protein_coding	1948.36	0.0832847	0.0542177	1.53615	0.124502	0.406701
CPB2	carboxypeptidase B2 [Source:HGNC Symbol;Acc:HGNC:2300]	1361		ENSG00000080618	protein_coding	0.88683	0.0242249	0.0483837	0.508619	0.611019
CHRNA3	cholinergic receptor nicotinic alpha 3 subunit [Source:HGNC Symbol;Acc:HGNC:1957]	1136	P32297	ENSG00000080644	protein_coding	4.08985	-0.092498	0.0939831	-0.99686	0.318832
KCNN2	potassium calcium-activated channel subfamily N member 2 [Source:HGNC Symbol;Acc:HGNC:6291]	3781	Q9H2S1	ENSG00000080709	protein_coding	0.215196	0.00862596	0.0243034	0.354932	0.722641
CNOT4	CCR4-NOT transcription complex subunit 4 [Source:HGNC Symbol;Acc:HGNC:7880]	4850	O95628	ENSG00000080802	protein_coding	119.38	0.0862401	0.138384	0.623549	0.532924	0.834736
PSEN1	presenilin 1 [Source:HGNC Symbol;Acc:HGNC:9508]	5663		ENSG00000080815	protein_coding	1649.05	-0.188836	0.0593946	-3.17914	0.00147714	0.0162838
CPOX	coproporphyrinogen oxidase [Source:HGNC Symbol;Acc:HGNC:2321]	1371		ENSG00000080819	protein_coding	2009.72	0.230597	0.0558655	4.12778	3.66283e-05	0.000706789
CLDND1	claudin domain containing 1 [Source:HGNC Symbol;Acc:HGNC:1322]	56650		ENSG00000080822	protein_coding	2530.33	0.341373	0.0545412	6.25906	3.87312e-10	2.13399e-08
MOK	MOK protein kinase [Source:HGNC Symbol;Acc:HGNC:9833]	5891		ENSG00000080823	protein_coding	452.63	-0.0368054	0.0906885	-0.405819	0.684876	0.903252
HSP90AA1	heat shock protein 90 alpha family class A member 1 [Source:HGNC Symbol;Acc:HGNC:5253]	3320	P07900	ENSG00000080824	protein_coding	13352.7	0.104895	0.102476	1.02361	0.306022	0.664742
RBL1	RB transcriptional corepressor like 1 [Source:HGNC Symbol;Acc:HGNC:9893]	5933	P28749	ENSG00000080839	protein_coding	413.884	0.157036	0.0931235	1.68649	0.0917023	0.336908
DLGAP4	DLG associated protein 4 [Source:HGNC Symbol;Acc:HGNC:24476]	22839	Q9Y2H0	ENSG00000080845	protein_coding	200.065	-0.194717	0.116988	-1.66341	0.0962305	0.347139
IGSF9B	immunoglobulin superfamily member 9B [Source:HGNC Symbol;Acc:HGNC:32326]	22997	Q9UPX0	ENSG00000080854	protein_coding	0.352904	0.00438114	0.0298384	0.146831	0.883265
CFHR2	complement factor H related 2 [Source:HGNC Symbol;Acc:HGNC:4890]	3080		ENSG00000080910	protein_coding	0
				ENSG00000080947		79.1713	-0.237429	0.149143	-1.58962	0.111921	0.38114
NDC80	NDC80, kinetochore complex component [Source:HGNC Symbol;Acc:HGNC:16909]	10403	O14777	ENSG00000080986	protein_coding	1763.16	0.0494965	0.0578231	0.856003	0.391996	0.742986
AP4E1	adaptor related protein complex 4 epsilon 1 subunit [Source:HGNC Symbol;Acc:HGNC:573]	23431		ENSG00000081014	protein_coding	690.78	0.00308912	0.0755414	0.0408931	0.967381	0.991241
RSBN1	round spermatid basic protein 1 [Source:HGNC Symbol;Acc:HGNC:25642]	54665	Q5VWQ0	ENSG00000081019	protein_coding	481.584	0.0116073	0.0939759	0.123506	0.901706	0.974632
MAGI3	membrane associated guanylate kinase, WW and PDZ domain containing 3 [Source:HGNC Symbol;Acc:HGNC:29647]	260425	Q5TCQ9	ENSG00000081026	protein_coding	364.636	0.040308	0.0978992	0.411748	0.680524	0.901449
CXCL2	C-X-C motif chemokine ligand 2 [Source:HGNC Symbol;Acc:HGNC:4603]	2920	P19875	ENSG00000081041	protein_coding	211.044	0.299364	0.119271	2.51022	0.0120657	0.0823223
AFP	alpha fetoprotein [Source:HGNC Symbol;Acc:HGNC:317]	174	P02771	ENSG00000081051	protein_coding	275.298	-0.0997311	0.11115	-0.897041	0.369697	0.724792
COL4A4	collagen type IV alpha 4 chain [Source:HGNC Symbol;Acc:HGNC:2206]	1286	P53420	ENSG00000081052	protein_coding	4.05319	-0.130636	0.0903497	-1.49856	0.133987
TCF7	transcription factor 7 [Source:HGNC Symbol;Acc:HGNC:11639]	6932	P36402	ENSG00000081059	protein_coding	25.6532	0.0850864	0.154071	0.552146	0.580848	0.858714
OSTM1	osteopetrosis associated transmembrane protein 1 [Source:HGNC Symbol;Acc:HGNC:21652]	28962	Q86WC4	ENSG00000081087	protein_coding	1485.74	-0.099113	0.0582559	-1.70127	0.0888923	0.330265
CDH7	cadherin 7 [Source:HGNC Symbol;Acc:HGNC:1766]	1005	Q9ULB5	ENSG00000081138	protein_coding	0.305398	-0.00985477	0.0260662	-0.394137	0.69348
IMPG2	interphotoreceptor matrix proteoglycan 2 [Source:HGNC Symbol;Acc:HGNC:18362]	50939	Q9BZV3	ENSG00000081148	protein_coding	5.80321	0.0166896	0.100743	0.164936	0.868995	0.963793
PCNP	PEST proteolytic signal containing nuclear protein [Source:HGNC Symbol;Acc:HGNC:30023]	57092	Q8WW12	ENSG00000081154	protein_coding	1318.42	0.232997	0.0730095	3.19141	0.00141582	0.0157303
EXD2	exonuclease 3'-5' domain containing 2 [Source:HGNC Symbol;Acc:HGNC:20217]	55218	Q9NVH0	ENSG00000081177	protein_coding	613.85	-0.180476	0.0805877	-2.2391	0.0251495	0.142742
ARG2	arginase 2 [Source:HGNC Symbol;Acc:HGNC:664]	384	P78540	ENSG00000081181	protein_coding	211.795	0.00388893	0.121067	0.0321219	0.974375	0.993368
MEF2C	myocyte enhancer factor 2C [Source:HGNC Symbol;Acc:HGNC:6996]	4208	Q06413	ENSG00000081189	protein_coding	116.961	0.176308	0.136245	1.29425	0.19558	0.525317
PTPRC	protein tyrosine phosphatase, receptor type C [Source:HGNC Symbol;Acc:HGNC:9666]	5788		ENSG00000081237	protein_coding	6.67839	0.0558463	0.11058	0.507736	0.611638	0.874133
CACNA1S	calcium voltage-gated channel subunit alpha1 S [Source:HGNC Symbol;Acc:HGNC:1397]	779		ENSG00000081248	protein_coding	185.982	-0.216484	0.122805	-1.76157	0.0781419	0.30592
PKP1	plakophilin 1 [Source:HGNC Symbol;Acc:HGNC:9023]	5317	Q13835	ENSG00000081277	protein_coding	1.4546	-0.0226085	0.0563182	-0.400804	0.688565
UBA5	ubiquitin like modifier activating enzyme 5 [Source:HGNC Symbol;Acc:HGNC:23230]	79876	Q9GZZ9	ENSG00000081307	protein_coding	523.392	0.0851326	0.085417	0.996706	0.318907	0.677914
STK17B	serine/threonine kinase 17b [Source:HGNC Symbol;Acc:HGNC:11396]	9262	O94768	ENSG00000081320	protein_coding	1433.8	0.101534	0.0650762	1.56027	0.118696	0.395524
CDC14B	cell division cycle 14B [Source:HGNC Symbol;Acc:HGNC:1719]	8555	O60729	ENSG00000081377	protein_coding	593.541	0.0157542	0.0832034	0.189355	0.849815	0.958432
ZNF510	zinc finger protein 510 [Source:HGNC Symbol;Acc:HGNC:29161]	22869	Q9Y2H8	ENSG00000081386	protein_coding	126.124	-0.0184226	0.134388	-0.137089	0.89096	0.971946
LRP2	LDL receptor related protein 2 [Source:HGNC Symbol;Acc:HGNC:6694]	4036	P98164	ENSG00000081479	protein_coding	2.25972	0.12309	0.0709156	1.83485	0.0665277
ZNF506	zinc finger protein 506 [Source:HGNC Symbol;Acc:HGNC:23780]	440515	Q5JVG8	ENSG00000081665	protein_coding	10.2955	0.0578388	0.127786	0.454196	0.649688	0.889783
JMJD4	jumonji domain containing 4 [Source:HGNC Symbol;Acc:HGNC:25724]	65094	Q9H9V9	ENSG00000081692	protein_coding	432.912	-0.174508	0.0904238	-1.92937	0.0536853	0.238326
DUSP12	dual specificity phosphatase 12 [Source:HGNC Symbol;Acc:HGNC:3067]	11266		ENSG00000081721	protein_coding	406.983	-0.0307415	0.0938677	-0.327485	0.743301	0.92581
AACS	acetoacetyl-CoA synthetase [Source:HGNC Symbol;Acc:HGNC:21298]	65985	Q86V21	ENSG00000081760	protein_coding	1038.15	-0.0354452	0.0657642	-0.538961	0.589914	0.862921
KIAA0141	KIAA0141 [Source:HGNC Symbol;Acc:HGNC:28969]	9812	Q14154	ENSG00000081791	protein_coding	705.186	-0.129429	0.0781872	-1.65523	0.097878	0.350628
SLC13A1	solute carrier family 13 member 1 [Source:HGNC Symbol;Acc:HGNC:10916]	6561	Q9BZW2	ENSG00000081800	protein_coding	0.152699	-0.00283079	0.0243034	-0.116473	0.907278
CADPS2	calcium dependent secretion activator 2 [Source:HGNC Symbol;Acc:HGNC:16018]	93664		ENSG00000081803	protein_coding	3.38951	-0.00905263	0.0810124	-0.11208	0.91076
PCDHB4	protocadherin beta 4 [Source:HGNC Symbol;Acc:HGNC:8689]	56131	Q9Y5E5	ENSG00000081818	protein_coding	0
PCDHA6	protocadherin alpha 6 [Source:HGNC Symbol;Acc:HGNC:8672]	56142	Q9UN73	ENSG00000081842	protein_coding	0.767519	0.0572332	0.0424683	1.44255	0.149146
PCDHGA2	protocadherin gamma subfamily A, 2 [Source:HGNC Symbol;Acc:HGNC:8700]	56113	Q9Y5H1	ENSG00000081853	protein_coding	0.720013	0.0303347	0.0410413	0.799629	0.423926
HSPB11	heat shock protein family B (small) member 11 [Source:HGNC Symbol;Acc:HGNC:25019]	51668		ENSG00000081870	protein_coding	611.705	0.0939084	0.0799472	1.17469	0.240117	0.588816
PHLPP1	PH domain and leucine rich repeat protein phosphatase 1 [Source:HGNC Symbol;Acc:HGNC:20610]	23239	O60346	ENSG00000081913	protein_coding	320.07	-0.124173	0.105758	-1.1739	0.240435	0.589137
ATP8B1	ATPase phospholipid transporting 8B1 [Source:HGNC Symbol;Acc:HGNC:3706]	5205	O43520	ENSG00000081923	protein_coding	414.008	0.330067	0.0955227	3.45604	0.000548176	0.00718369
IL12RB2	interleukin 12 receptor subunit beta 2 [Source:HGNC Symbol;Acc:HGNC:5972]	3595	Q99665	ENSG00000081985	protein_coding	4.64897	0.149095	0.0978512	1.54439	0.122495	0.403267
SMARCD3	SWI/SNF related, matrix associated, actin dependent regulator of chromatin, subfamily d, member 3 [Source:HGNC Symbol;Acc:HGNC:11108]	6604	Q6STE5	ENSG00000082014	protein_coding	144.118	0.113131	0.13107	0.863362	0.387939	0.739616
WDR70	WD repeat domain 70 [Source:HGNC Symbol;Acc:HGNC:25495]	55100	Q9NW82	ENSG00000082068	protein_coding	1292.28	-0.00658334	0.0650781	-0.10116	0.919423	0.979785
FYB1	FYN binding protein 1 [Source:HGNC Symbol;Acc:HGNC:4036]	2533	O15117	ENSG00000082074	protein_coding	4.14803	0.11399	0.0908485	1.26757	0.204951
MPP4	membrane palmitoylated protein 4 [Source:HGNC Symbol;Acc:HGNC:13680]	58538	Q96JB8	ENSG00000082126	protein_coding	3.83091	0.0763831	0.0907987	0.841206	0.400232
STRADB	STE20-related kinase adaptor beta [Source:HGNC Symbol;Acc:HGNC:13205]	55437		ENSG00000082146	protein_coding	1318.36	-0.166254	0.0609812	-2.7261	0.00640871	0.0515049
BZW1	basic leucine zipper and W2 domains 1 [Source:HGNC Symbol;Acc:HGNC:18380]	9689		ENSG00000082153	protein_coding	3374.64	0.141442	0.0500481	2.82614	0.00471121	0.0406626
PGR	progesterone receptor [Source:HGNC Symbol;Acc:HGNC:8910]	5241	P06401	ENSG00000082175	protein_coding	107.398	-0.191061	0.140716	-1.35702	0.174773	0.493864
C1QTNF3	C1q and TNF related 3 [Source:HGNC Symbol;Acc:HGNC:14326]	114899	Q9BXJ4	ENSG00000082196	protein_coding	938.129	-0.812877	0.0897668	-9.04678	1.47245e-19	2.74456e-17
ME2	malic enzyme 2 [Source:HGNC Symbol;Acc:HGNC:6984]	4200	P23368	ENSG00000082212	protein_coding	667.831	-0.0397943	0.0776337	-0.51257	0.608252	0.872624
C5orf22	chromosome 5 open reading frame 22 [Source:HGNC Symbol;Acc:HGNC:25639]	55322	Q49AR2	ENSG00000082213	protein_coding	504.539	0.130043	0.0878701	1.48013	0.138839	0.434459
CCNT2	cyclin T2 [Source:HGNC Symbol;Acc:HGNC:1600]	905		ENSG00000082258	protein_coding	1274.26	0.000540202	0.064541	0.00836946	0.993322	0.998628
FAM135A	family with sequence similarity 135 member A [Source:HGNC Symbol;Acc:HGNC:21084]	57579	Q9P2D6	ENSG00000082269	protein_coding	423.122	0.325739	0.094634	3.44221	0.000576985	0.00747016
COL19A1	collagen type XIX alpha 1 chain [Source:HGNC Symbol;Acc:HGNC:2196]	1310	Q14993	ENSG00000082293	protein_coding	0.430392	0.0212819	0.0295496	0.746417	0.455416
EPB41L3	erythrocyte membrane protein band 4.1 like 3 [Source:HGNC Symbol;Acc:HGNC:3380]	23136	Q9Y2J2	ENSG00000082397	protein_coding	0.543081	0.0159838	0.0344165	0.493483	0.621672
COBLL1	cordon-bleu WH2 repeat protein like 1 [Source:HGNC Symbol;Acc:HGNC:23571]	22837	Q53SF7	ENSG00000082438	protein_coding	455.086	-0.244825	0.0940652	-2.60184	0.00927243	0.0681183
DLG3	discs large MAGUK scaffold protein 3 [Source:HGNC Symbol;Acc:HGNC:2902]	1741		ENSG00000082458	protein_coding	261.664	-0.150248	0.115786	-1.2974	0.194492	0.523785
KCNK2	potassium two pore domain channel subfamily K member 2 [Source:HGNC Symbol;Acc:HGNC:6277]	3776		ENSG00000082482	protein_coding	311.415	0.57946	0.104505	5.54359	2.96329e-08	1.13362e-06
SERTAD4	SERTA domain containing 4 [Source:HGNC Symbol;Acc:HGNC:25236]	56256	Q9NUC0	ENSG00000082497	protein_coding	265.501	-0.148561	0.109079	-1.36159	0.173327	0.49164
TRAF5	TNF receptor associated factor 5 [Source:HGNC Symbol;Acc:HGNC:12035]	7188	O00463	ENSG00000082512	protein_coding	79.7803	0.473754	0.147597	3.20914	0.00133133	0.0149912
MRPL22	mitochondrial ribosomal protein L22 [Source:HGNC Symbol;Acc:HGNC:14480]	29093	Q9NWU5	ENSG00000082515	protein_coding	650.323	0.0138456	0.0792192	0.174777	0.861255	0.961222
GEMIN5	gem nuclear organelle associated protein 5 [Source:HGNC Symbol;Acc:HGNC:20043]	25929	Q8TEQ6	ENSG00000082516	protein_coding	1055.72	0.165078	0.0707329	2.33391	0.0196004	0.119201
OPRK1	opioid receptor kappa 1 [Source:HGNC Symbol;Acc:HGNC:8154]	4986	P41145	ENSG00000082556	protein_coding	0.367895	0.00450907	0.0302669	0.148979	0.88157
NFE2L1	nuclear factor, erythroid 2 like 1 [Source:HGNC Symbol;Acc:HGNC:7781]	4779		ENSG00000082641	protein_coding	2851.5	-0.211018	0.0545805	-3.86599	0.000110639	0.00184094
SEMA5B	semaphorin 5B [Source:HGNC Symbol;Acc:HGNC:10737]	54437		ENSG00000082684	protein_coding	117.768	0.0176747	0.137232	0.1288	0.897516	0.973495
GSK3B	glycogen synthase kinase 3 beta [Source:HGNC Symbol;Acc:HGNC:4617]	2932	P49841	ENSG00000082701	protein_coding	1192.66	0.0155481	0.0644956	0.241075	0.809497	0.947251
ITGB5	integrin subunit beta 5 [Source:HGNC Symbol;Acc:HGNC:6160]	3693	P18084	ENSG00000082781	protein_coding	2010.11	0.350126	0.0560495	6.24682	4.18897e-10	2.29359e-08
ERC1	ELKS/RAB6-interacting/CAST family member 1 [Source:HGNC Symbol;Acc:HGNC:17072]	23085		ENSG00000082805	protein_coding	793.395	0.144498	0.0738318	1.95725	0.0503178	0.229042
XPO1	exportin 1 [Source:HGNC Symbol;Acc:HGNC:12825]	7514	O14980	ENSG00000082898	protein_coding	6141.17	0.160647	0.0452368	3.55126	0.00038339	0.00533548
				ENSG00000082929		0
RNF13	ring finger protein 13 [Source:HGNC Symbol;Acc:HGNC:10057]	11342	O43567	ENSG00000082996	protein_coding	1013.02	-0.135024	0.0675361	-1.99914	0.0455929	0.215609
TRPM3	transient receptor potential cation channel subfamily M member 3 [Source:HGNC Symbol;Acc:HGNC:17992]	80036	Q9HCF6	ENSG00000083067	protein_coding	1.23778	0.028675	0.0549103	0.528922	0.59686
PALB2	partner and localizer of BRCA2 [Source:HGNC Symbol;Acc:HGNC:26144]	79728		ENSG00000083093	protein_coding	417.955	-0.0324792	0.090627	-0.358369	0.720067	0.916584
DOPEY1	dopey family member 1 [Source:HGNC Symbol;Acc:HGNC:21194]	23033	Q5JWR5	ENSG00000083097	protein_coding	313.98	-0.265837	0.102442	-2.59323	0.00950787	0.0692671
LYRM2	LYR motif containing 2 [Source:HGNC Symbol;Acc:HGNC:25229]	57226		ENSG00000083099	protein_coding	474.115	-0.119638	0.0894994	-1.33657	0.181362	0.503332
BCKDHB	branched chain keto acid dehydrogenase E1 subunit beta [Source:HGNC Symbol;Acc:HGNC:987]	594	P21953	ENSG00000083123	protein_coding	688.873	-0.104552	0.0752674	-1.38893	0.164854	0.478449
KAT6A	lysine acetyltransferase 6A [Source:HGNC Symbol;Acc:HGNC:13013]	7994	Q92794	ENSG00000083168	protein_coding	866.744	-0.0441969	0.0698705	-0.632541	0.527033	0.830783
ZCCHC6	zinc finger CCHC-type containing 6 [Source:HGNC Symbol;Acc:HGNC:25817]	79670		ENSG00000083223	protein_coding	476.476	0.0707808	0.0887473	0.797649	0.425074	0.769235
ULK2	unc-51 like autophagy activating kinase 2 [Source:HGNC Symbol;Acc:HGNC:13480]	9706	Q8IYT8	ENSG00000083290	protein_coding	0.925181	0.0450072	0.0457983	1.0769	0.281527
GRHL2	grainyhead like transcription factor 2 [Source:HGNC Symbol;Acc:HGNC:2799]	79977	Q6ISB3	ENSG00000083307	protein_coding	0.933256	0.0514415	0.0479083	1.14239	0.253294
TNPO1	transportin 1 [Source:HGNC Symbol;Acc:HGNC:6401]	3842	Q92973	ENSG00000083312	protein_coding	6941.43	0.141679	0.040383	3.50841	0.000450801	0.00608043
PLOD1	procollagen-lysine,2-oxoglutarate 5-dioxygenase 1 [Source:HGNC Symbol;Acc:HGNC:9081]	5351		ENSG00000083444	protein_coding	2026.03	-0.141323	0.0631637	-2.23737	0.0252622	0.143057
P2RX5	purinergic receptor P2X 5 [Source:HGNC Symbol;Acc:HGNC:8536]	5026		ENSG00000083454	protein_coding	43.5527	0.526045	0.157926	3.32595	0.000881164	0.0106696
ITGAE	integrin subunit alpha E [Source:HGNC Symbol;Acc:HGNC:6147]	3682	P38570	ENSG00000083457	protein_coding	451.813	0.261214	0.0933551	2.79821	0.00513874	0.0433648
DIS3	DIS3 homolog, exosome endoribonuclease and 3'-5' exoribonuclease [Source:HGNC Symbol;Acc:HGNC:20604]	22894	Q9Y2L1	ENSG00000083520	protein_coding	1866.08	0.0804518	0.0556046	1.44687	0.147933	0.451319
PIBF1	progesterone immunomodulatory binding factor 1 [Source:HGNC Symbol;Acc:HGNC:23352]	10464	Q8WXW3	ENSG00000083535	protein_coding	582.253	-0.0930152	0.0853148	-1.09011	0.275664	0.631691
TDRD3	tudor domain containing 3 [Source:HGNC Symbol;Acc:HGNC:20612]	81550		ENSG00000083544	protein_coding	366.652	-0.186486	0.0952574	-1.95705	0.050342	0.229042
				ENSG00000083622		0
NUFIP1	NUFIP1, FMR1 interacting protein 1 [Source:HGNC Symbol;Acc:HGNC:8057]	26747	Q9UHK0	ENSG00000083635	protein_coding	319.609	0.119285	0.10989	1.0855	0.277702	0.63404
PDS5B	PDS5 cohesin associated factor B [Source:HGNC Symbol;Acc:HGNC:20418]	23047	Q9NTI5	ENSG00000083642	protein_coding	1014.36	-0.0506328	0.068042	-0.744119	0.456805	0.789769
OXCT1	3-oxoacid CoA-transferase 1 [Source:HGNC Symbol;Acc:HGNC:8527]	5019	P55809	ENSG00000083720	protein_coding	1523.17	0.0561213	0.0613551	0.914713	0.360342	0.716066
RRAGB	Ras related GTP binding B [Source:HGNC Symbol;Acc:HGNC:19901]	10325	Q5VZM2	ENSG00000083750	protein_coding	405.753	-0.426181	0.0942851	-4.51613	6.29807e-06	0.000147525
EPYC	epiphycan [Source:HGNC Symbol;Acc:HGNC:3053]	1833	Q99645	ENSG00000083782	protein_coding	2.39918	0.15131	0.0715318	2.39649	0.0165528
CYLD	CYLD lysine 63 deubiquitinase [Source:HGNC Symbol;Acc:HGNC:2584]	1540		ENSG00000083799	protein_coding	874.175	0.0572583	0.0723416	0.791501	0.428652	0.771987
SLC27A5	solute carrier family 27 member 5 [Source:HGNC Symbol;Acc:HGNC:10999]	10998		ENSG00000083807	protein_coding	82.5973	0.0149568	0.150531	0.0993548	0.920857	0.980274
ZNF324	zinc finger protein 324 [Source:HGNC Symbol;Acc:HGNC:14096]	25799	O75467	ENSG00000083812	protein_coding	243.155	0.0700573	0.109996	0.636961	0.52415	0.829138
ZNF671	zinc finger protein 671 [Source:HGNC Symbol;Acc:HGNC:26279]	79891		ENSG00000083814	protein_coding	3.38256	-0.0498871	0.0852503	-0.586141	0.557781
ZNF416	zinc finger protein 416 [Source:HGNC Symbol;Acc:HGNC:20645]	55659	Q9BWM5	ENSG00000083817	protein_coding	118.747	-0.154679	0.139753	-1.10632	0.268589	0.623018
ZNF586	zinc finger protein 586 [Source:HGNC Symbol;Acc:HGNC:25949]	54807	Q9NXT0	ENSG00000083828	protein_coding	224.7	-0.0098515	0.112495	-0.0875695	0.930219	0.982444
ZNF446	zinc finger protein 446 [Source:HGNC Symbol;Acc:HGNC:21036]	55663		ENSG00000083838	protein_coding	110.532	-0.343613	0.139877	-2.45154	0.0142246	0.093463
ZNF264	zinc finger protein 264 [Source:HGNC Symbol;Acc:HGNC:13057]	9422	O43296	ENSG00000083844	protein_coding	334.545	0.0504403	0.0987602	0.510766	0.609515	0.873092
RPS5	ribosomal protein S5 [Source:HGNC Symbol;Acc:HGNC:10426]	6193	P46782	ENSG00000083845	protein_coding	15172.5	0.00560751	0.0511148	0.109704	0.912644	0.977829
FAT1	FAT atypical cadherin 1 [Source:HGNC Symbol;Acc:HGNC:3595]	2195	Q14517	ENSG00000083857	protein_coding	12252.3	0.07848	0.0454825	1.7255	0.0844367	0.320497
YTHDC1	YTH domain containing 1 [Source:HGNC Symbol;Acc:HGNC:30626]	91746	Q96MU7	ENSG00000083896	protein_coding	1623.08	0.11604	0.0570992	2.03229	0.0421244	0.204392
CHMP2B	charged multivesicular body protein 2B [Source:HGNC Symbol;Acc:HGNC:24537]	25978	Q9UQN3	ENSG00000083937	protein_coding	930.944	0.0179666	0.0704409	0.255061	0.798676	0.943754
SMAP2	small ArfGAP2 [Source:HGNC Symbol;Acc:HGNC:25082]	64744		ENSG00000084070	protein_coding	197.499	0.0770523	0.11857	0.649968	0.515713	0.823877
PPIE	peptidylprolyl isomerase E [Source:HGNC Symbol;Acc:HGNC:9258]	10450		ENSG00000084072	protein_coding	577.483	-0.0337965	0.0867908	-0.389368	0.697004	0.907766
ZMPSTE24	zinc metallopeptidase STE24 [Source:HGNC Symbol;Acc:HGNC:12877]	10269	O75844	ENSG00000084073	protein_coding	2048.46	0.0346812	0.0541633	0.640314	0.521969	0.827768
STARD7	StAR related lipid transfer domain containing 7 [Source:HGNC Symbol;Acc:HGNC:18063]	56910	Q9NQZ5	ENSG00000084090	protein_coding	4143.99	0.0833596	0.0463611	1.79807	0.0721667	0.291009
NOA1	nitric oxide associated 1 [Source:HGNC Symbol;Acc:HGNC:28473]	84273	Q8NC60	ENSG00000084092	protein_coding	546.316	-0.0665005	0.0891622	-0.74578	0.455801	0.789372
REST	RE1 silencing transcription factor [Source:HGNC Symbol;Acc:HGNC:9966]	5978	Q13127	ENSG00000084093	protein_coding	1176.94	0.0935128	0.0673421	1.38865	0.164938	0.478479
HAL	histidine ammonia-lyase [Source:HGNC Symbol;Acc:HGNC:4806]	3034	P42357	ENSG00000084110	protein_coding	9.35488	0.135051	0.125771	1.07286	0.283332	0.641046
SSH1	slingshot protein phosphatase 1 [Source:HGNC Symbol;Acc:HGNC:30579]	54434	Q8WYL5	ENSG00000084112	protein_coding	553.404	-0.0327449	0.0974362	-0.336047	0.736835	0.923333
GSTP1	glutathione S-transferase pi 1 [Source:HGNC Symbol;Acc:HGNC:4638]	2950	P09211	ENSG00000084207	protein_coding	23376.6	-0.206119	0.0458685	-4.49367	7.00047e-06	0.000162889
APLP2	amyloid beta precursor like protein 2 [Source:HGNC Symbol;Acc:HGNC:598]	334		ENSG00000084234	protein_coding	10466.6	-0.0672912	0.0418975	-1.60608	0.108255	0.374111
FAM234B	family with sequence similarity 234 member B [Source:HGNC Symbol;Acc:HGNC:29288]	57613	A2RU67	ENSG00000084444	protein_coding	146.222	0.107504	0.130247	0.825725	0.40896	0.757281
SLCO1A2	solute carrier organic anion transporter family member 1A2 [Source:HGNC Symbol;Acc:HGNC:10956]	6579	P46721	ENSG00000084453	protein_coding	4.74396	0.00425195	0.096923	0.0439223	0.964966	0.990483
WBP11	WW domain binding protein 11 [Source:HGNC Symbol;Acc:HGNC:16461]	51729	Q9Y2W2	ENSG00000084463	protein_coding	773.162	0.0799689	0.0837727	0.954587	0.339787	0.69719
EIF3I	eukaryotic translation initiation factor 3 subunit I [Source:HGNC Symbol;Acc:HGNC:3272]	8668		ENSG00000084623	protein_coding	5273.43	-0.0148692	0.0488434	-0.304426	0.760803	0.930803
NKAIN1	sodium/potassium transporting ATPase interacting 1 [Source:HGNC Symbol;Acc:HGNC:25743]	79570	Q4KMZ8	ENSG00000084628	protein_coding	0.376264	0.0227081	0.0305146	0.719179	0.47203
COL16A1	collagen type XVI alpha 1 chain [Source:HGNC Symbol;Acc:HGNC:2193]	1307	Q07092	ENSG00000084636	protein_coding	31.3885	0.167694	0.156598	1.07065	0.284328	0.642498
TXLNA	taxilin alpha [Source:HGNC Symbol;Acc:HGNC:30685]	200081	P40222	ENSG00000084652	protein_coding	5347.21	-0.0437333	0.0429144	-1.01908	0.308166	0.666793
APOB	apolipoprotein B [Source:HGNC Symbol;Acc:HGNC:603]	338	P04114	ENSG00000084674	protein_coding	0.478719	0.0157901	0.0331544	0.426306	0.669885
NCOA1	nuclear receptor coactivator 1 [Source:HGNC Symbol;Acc:HGNC:7668]	8648	Q15788	ENSG00000084676	protein_coding	914.832	-0.0740606	0.0703579	-1.05257	0.292537	0.651387
AGBL5	ATP/GTP binding protein like 5 [Source:HGNC Symbol;Acc:HGNC:26147]	60509		ENSG00000084693	protein_coding	1031.47	-0.194828	0.0660108	-2.95106	0.00316682	0.0298151
EFR3B	EFR3 homolog B [Source:HGNC Symbol;Acc:HGNC:29155]	22979	Q9Y2G0	ENSG00000084710	protein_coding	8.47404	0.041378	0.118933	0.346873	0.728687	0.920432
KIF3C	kinesin family member 3C [Source:HGNC Symbol;Acc:HGNC:6321]	3797	O14782	ENSG00000084731	protein_coding	702.75	0.255106	0.0753891	3.38414	0.000714014	0.00897434
RAB10	RAB10, member RAS oncogene family [Source:HGNC Symbol;Acc:HGNC:9759]	10890	P61026	ENSG00000084733	protein_coding	4490.2	0.0291426	0.0451526	0.645427	0.51865	0.82589
GCKR	glucokinase regulator [Source:HGNC Symbol;Acc:HGNC:4196]	2646		ENSG00000084734	protein_coding	3.57729	0.138151	0.0839112	1.7201	0.0854136
HADHA	hydroxyacyl-CoA dehydrogenase trifunctional multienzyme complex subunit alpha [Source:HGNC Symbol;Acc:HGNC:4801]	3030	P40939	ENSG00000084754	protein_coding	4809.3	-0.073845	0.0454537	-1.6246	0.104247	0.36545
MAPRE3	microtubule associated protein RP/EB family member 3 [Source:HGNC Symbol;Acc:HGNC:6892]	22924	Q9UPY8	ENSG00000084764	protein_coding	8.99983	-0.140615	0.123964	-1.14194	0.253478	0.604279
CAD	carbamoyl-phosphate synthetase 2, aspartate transcarbamylase, and dihydroorotase [Source:HGNC Symbol;Acc:HGNC:1424]	790	P27708	ENSG00000084774	protein_coding	1721.57	-0.0387902	0.0763079	-0.508325	0.611225	0.874133
CD59	CD59 molecule (CD59 blood group) [Source:HGNC Symbol;Acc:HGNC:1689]	966		ENSG00000085063	protein_coding	8415.65	-0.199351	0.0539273	-3.69662	0.000218486	0.00329724
CD82	CD82 molecule [Source:HGNC Symbol;Acc:HGNC:6210]	3732		ENSG00000085117	protein_coding	94.0683	0.920099	0.144402	6.34036	2.29226e-10	1.31681e-08
BCORL1	BCL6 corepressor like 1 [Source:HGNC Symbol;Acc:HGNC:25657]	63035		ENSG00000085185	protein_coding	48.9327	-0.043604	0.157069	-0.277283	0.781563	0.937829
ATRX	ATRX, chromatin remodeler [Source:HGNC Symbol;Acc:HGNC:886]	546	P46100	ENSG00000085224	protein_coding	3339.6	0.0525167	0.0507803	1.0342	0.301044	0.659117
AK6	adenylate kinase 6 [Source:HGNC Symbol;Acc:HGNC:49151]	102157402	Q9Y3D8	ENSG00000085231	protein_coding	313.862	-0.0353284	0.102497	-0.344669	0.730343	0.921007
FCN1	ficolin 1 [Source:HGNC Symbol;Acc:HGNC:3623]	2219	O00602	ENSG00000085265	protein_coding	0.341796	0.0042845	0.0295105	0.145188	0.884562
MYNN	myoneurin [Source:HGNC Symbol;Acc:HGNC:14955]	55892	Q9NPC7	ENSG00000085274	protein_coding	410.483	0.0695452	0.0926534	0.7506	0.452893	0.787529
MECOM	MDS1 and EVI1 complex locus [Source:HGNC Symbol;Acc:HGNC:3498]	2122	Q03112	ENSG00000085276	protein_coding	281.689	-0.00468021	0.109437	-0.0427655	0.965888	0.990537
SCAMP1	secretory carrier membrane protein 1 [Source:HGNC Symbol;Acc:HGNC:10563]	9522	O15126	ENSG00000085365	protein_coding	1526.5	-0.0503379	0.0676415	-0.744172	0.456773	0.789769
PREP	prolyl endopeptidase [Source:HGNC Symbol;Acc:HGNC:9358]	5550	P48147	ENSG00000085377	protein_coding	388.892	-0.024988	0.098519	-0.25362	0.799789	0.943973
HACE1	HECT domain and ankyrin repeat containing E3 ubiquitin protein ligase 1 [Source:HGNC Symbol;Acc:HGNC:21033]	57531	Q8IYU2	ENSG00000085382	protein_coding	437.303	0.0070115	0.092767	0.0755813	0.939752	0.984534
SEH1L	SEH1 like nucleoporin [Source:HGNC Symbol;Acc:HGNC:30379]	81929		ENSG00000085415	protein_coding	824.053	0.0819935	0.0740154	1.1078	0.267946	0.62206
WDR47	WD repeat domain 47 [Source:HGNC Symbol;Acc:HGNC:29141]	22911	O94967	ENSG00000085433	protein_coding	496.57	-0.0685822	0.0872043	-0.786389	0.431639	0.774046
WDFY1	WD repeat and FYVE domain containing 1 [Source:HGNC Symbol;Acc:HGNC:20451]	57590	Q8IWB7	ENSG00000085449	protein_coding	3414.53	0.0309183	0.0490161	0.630783	0.528183	0.831846
OVGP1	oviductal glycoprotein 1 [Source:HGNC Symbol;Acc:HGNC:8524]	5016	Q12889	ENSG00000085465	protein_coding	14.7674	0.125978	0.141522	0.889248	0.37387	0.727904
SLC25A24	solute carrier family 25 member 24 [Source:HGNC Symbol;Acc:HGNC:20662]	29957	Q6NUK1	ENSG00000085491	protein_coding	1927.39	0.123518	0.053329	2.31621	0.020547	0.123841
MAP3K4	mitogen-activated protein kinase kinase kinase 4 [Source:HGNC Symbol;Acc:HGNC:6856]	4216	Q9Y6R4	ENSG00000085511	protein_coding	786.941	-0.00732861	0.0757186	-0.0967861	0.922896	0.981128
PILRA	paired immunoglobin like type 2 receptor alpha [Source:HGNC Symbol;Acc:HGNC:20396]	29992		ENSG00000085514	protein_coding	1.95901	-0.0209521	0.0676007	-0.314493	0.753146
IGSF9	immunoglobulin superfamily member 9 [Source:HGNC Symbol;Acc:HGNC:18132]	57549	Q9P2J2	ENSG00000085552	protein_coding	8.52094	0.379192	0.118984	3.28114	0.00103388	0.0121902
ABCB1	ATP binding cassette subfamily B member 1 [Source:HGNC Symbol;Acc:HGNC:40]	5243	P08183	ENSG00000085563	protein_coding	489.846	-0.186854	0.0870675	-2.14562	0.0319032	0.169387
ZNF213	zinc finger protein 213 [Source:HGNC Symbol;Acc:HGNC:13005]	7760		ENSG00000085644	protein_coding	49.9652	0.036766	0.157927	0.23249	0.816158	0.94855
AKR1B1	aldo-keto reductase family 1 member B [Source:HGNC Symbol;Acc:HGNC:381]	231	P15121	ENSG00000085662	protein_coding	6980.54	-0.0453691	0.0441989	-1.02647	0.304669	0.663236
CPNE3	copine 3 [Source:HGNC Symbol;Acc:HGNC:2316]	8895	O75131	ENSG00000085719	protein_coding	3221.24	-0.0498462	0.0513938	-0.969885	0.332104	0.690348
RRN3	RRN3 homolog, RNA polymerase I transcription factor [Source:HGNC Symbol;Acc:HGNC:30346]	54700	Q9NYV6	ENSG00000085721	protein_coding	968.29	0.135886	0.0679251	2.00062	0.0454332	0.214914
CTTN	cortactin [Source:HGNC Symbol;Acc:HGNC:3338]	2017	Q14247	ENSG00000085733	protein_coding	9340.11	-0.0574847	0.0409915	-1.40235	0.16081	0.471477
WNT11	Wnt family member 11 [Source:HGNC Symbol;Acc:HGNC:12776]	7481	O96014	ENSG00000085741	protein_coding	37.9372	-0.226004	0.157924	-1.42993	0.152738	0.458949
MTIF2	mitochondrial translational initiation factor 2 [Source:HGNC Symbol;Acc:HGNC:7441]	4528	P46199	ENSG00000085760	protein_coding	1226.45	-0.238188	0.06228	-3.82391	0.000131352	0.00213094
DDHD2	DDHD domain containing 2 [Source:HGNC Symbol;Acc:HGNC:29106]	23259		ENSG00000085788	protein_coding	1264.15	-0.00490372	0.0624566	-0.0785151	0.937418	0.983986
TTC39A	tetratricopeptide repeat domain 39A [Source:HGNC Symbol;Acc:HGNC:18657]	22996	Q5SRH9	ENSG00000085831	protein_coding	995.962	-0.354453	0.0765407	-4.62977	3.66065e-06	9.18887e-05
EPS15	epidermal growth factor receptor pathway substrate 15 [Source:HGNC Symbol;Acc:HGNC:3419]	2060		ENSG00000085832	protein_coding	1490.17	-0.090946	0.0579737	-1.56869	0.116721	0.391251
ORC1	origin recognition complex subunit 1 [Source:HGNC Symbol;Acc:HGNC:8487]	4998	Q13415	ENSG00000085840	protein_coding	504.371	0.222285	0.0940704	2.36296	0.0181299	0.112483
MGST2	microsomal glutathione S-transferase 2 [Source:HGNC Symbol;Acc:HGNC:7063]	4258	Q99735	ENSG00000085871	protein_coding	360.029	-0.0610863	0.100673	-0.606752	0.544015	0.841205
CHERP	calcium homeostasis endoplasmic reticulum protein [Source:HGNC Symbol;Acc:HGNC:16930]	10523	Q8IWX8	ENSG00000085872	protein_coding	78.6991	0.116103	0.149597	0.776385	0.437522	0.778335
ATG16L1	autophagy related 16 like 1 [Source:HGNC Symbol;Acc:HGNC:21498]	55054		ENSG00000085978	protein_coding	674.98	0.0548	0.0780296	0.702306	0.482488	0.807026
USP40	ubiquitin specific peptidase 40 [Source:HGNC Symbol;Acc:HGNC:20069]	55230	Q9NVE5	ENSG00000085982	protein_coding	1136.42	-0.130613	0.0648725	-2.01322	0.0440917	0.210786
POMGNT1	protein O-linked mannose N-acetylglucosaminyltransferase 1 (beta 1,2-) [Source:HGNC Symbol;Acc:HGNC:19139]	55624	Q8WZA1	ENSG00000085998	protein_coding	1835.85	-0.0565081	0.0598027	-0.944901	0.34471	0.702481
RAD54L	RAD54 like [Source:HGNC Symbol;Acc:HGNC:9826]	8438		ENSG00000085999	protein_coding	164.966	0.0910598	0.128415	0.709178	0.478214	0.803122
MAST2	microtubule associated serine/threonine kinase 2 [Source:HGNC Symbol;Acc:HGNC:19035]	23139	Q6P0Q8	ENSG00000086015	protein_coding	416.919	-0.0455606	0.111986	-0.406796	0.684158	0.902918
DNAJA1	DnaJ heat shock protein family (Hsp40) member A1 [Source:HGNC Symbol;Acc:HGNC:5229]	3301	P31689	ENSG00000086061	protein_coding	8844.36	0.344389	0.0416328	8.2721	1.31623e-16	1.93795e-14
B4GALT1	beta-1,4-galactosyltransferase 1 [Source:HGNC Symbol;Acc:HGNC:924]	2683	P15291	ENSG00000086062	protein_coding	3319.36	-0.143872	0.0685931	-2.09743	0.0359556	0.183928
CHMP5	charged multivesicular body protein 5 [Source:HGNC Symbol;Acc:HGNC:26942]	51510	Q9NZZ3	ENSG00000086065	protein_coding	1520.03	-0.0594011	0.063574	-0.934345	0.350126	0.707232
NFX1	nuclear transcription factor, X-box binding 1 [Source:HGNC Symbol;Acc:HGNC:7803]	4799	Q12986	ENSG00000086102	protein_coding	354.401	0.00920331	0.100223	0.0918308	0.926832	0.982156
AQP6	aquaporin 6 [Source:HGNC Symbol;Acc:HGNC:639]	363		ENSG00000086159	protein_coding	120.147	-0.589654	0.144398	-4.06942	4.71304e-05	0.000884124
DIMT1	DIM1 dimethyladenosine transferase 1 homolog [Source:HGNC Symbol;Acc:HGNC:30217]	27292	Q9UNQ2	ENSG00000086189	protein_coding	614.9	0.176117	0.0838847	2.09963	0.0357611	0.183101
IPO11	importin 11 [Source:HGNC Symbol;Acc:HGNC:20628]	51194		ENSG00000086200	protein_coding	306.51	0.258714	0.108005	2.39599	0.0165756	0.104732
FOLH1	folate hydrolase 1 [Source:HGNC Symbol;Acc:HGNC:3788]	2346	Q04609	ENSG00000086205	protein_coding	0.543954	0.0175158	0.0366126	0.514887	0.606632
EIF2AK1	eukaryotic translation initiation factor 2 alpha kinase 1 [Source:HGNC Symbol;Acc:HGNC:24921]	27102	Q9BQI3	ENSG00000086232	protein_coding	2427.59	0.0931777	0.0522173	1.78444	0.0743518	0.296612
NME8	NME/NM23 family member 8 [Source:HGNC Symbol;Acc:HGNC:16473]	51314	Q8N427	ENSG00000086288	protein_coding	1.63819	-0.0618237	0.0625996	-1.02418	0.30575
EPDR1	ependymin related 1 [Source:HGNC Symbol;Acc:HGNC:17572]	54749		ENSG00000086289	protein_coding	5095.4	0.180856	0.047012	3.84705	0.000119547	0.00196489
SNX10	sorting nexin 10 [Source:HGNC Symbol;Acc:HGNC:14974]	29887		ENSG00000086300	protein_coding	1002.22	0.0286108	0.0663721	0.431072	0.666416	0.896578
SEPHS1	selenophosphate synthetase 1 [Source:HGNC Symbol;Acc:HGNC:19685]	22929	P49903	ENSG00000086475	protein_coding	1687.7	0.0141608	0.0600532	0.235802	0.813586	0.947858
MRPL28	mitochondrial ribosomal protein L28 [Source:HGNC Symbol;Acc:HGNC:14484]	10573	Q13084	ENSG00000086504	protein_coding	1515.03	-0.0585286	0.0625814	-0.935206	0.349682	0.707126
HBQ1	hemoglobin subunit theta 1 [Source:HGNC Symbol;Acc:HGNC:4833]	3049	P09105	ENSG00000086506	protein_coding	1.35523	0.0196077	0.0597201	0.329008	0.742149
ITPKC	inositol-trisphosphate 3-kinase C [Source:HGNC Symbol;Acc:HGNC:14897]	80271	Q96DU7	ENSG00000086544	protein_coding	451.35	0.0903208	0.0907361	0.995534	0.319477	0.678409
CEACAM6	carcinoembryonic antigen related cell adhesion molecule 6 [Source:HGNC Symbol;Acc:HGNC:1818]	4680		ENSG00000086548	protein_coding	0.391255	0.0232577	0.0308782	0.742954	0.45751
FAT2	FAT atypical cadherin 2 [Source:HGNC Symbol;Acc:HGNC:3596]	2196		ENSG00000086570	protein_coding	32.0395	0.288058	0.15723	1.83194	0.0669598	0.276382
RBM22	RNA binding motif protein 22 [Source:HGNC Symbol;Acc:HGNC:25503]	55696	Q9NW64	ENSG00000086589	protein_coding	817.302	0.0623325	0.072834	0.855835	0.392089	0.743082
TMED2	transmembrane p24 trafficking protein 2 [Source:HGNC Symbol;Acc:HGNC:16996]	10959	Q15363	ENSG00000086598	protein_coding	6435.51	0.0562715	0.0420475	1.33829	0.180801	0.502589
ERO1B	endoplasmic reticulum oxidoreductase 1 beta [Source:HGNC Symbol;Acc:HGNC:14355]	56605	Q86YB8	ENSG00000086619	protein_coding	840.283	0.258223	0.0778878	3.31555	0.000914626	0.0109837
ZFAND6	zinc finger AN1-type containing 6 [Source:HGNC Symbol;Acc:HGNC:30164]	54469	Q6FIF0	ENSG00000086666	protein_coding	1730.72	0.0305535	0.0589542	0.518261	0.604276	0.87064
HSD17B2	hydroxysteroid 17-beta dehydrogenase 2 [Source:HGNC Symbol;Acc:HGNC:5211]	3294		ENSG00000086696	protein_coding	2.25836	-0.0388979	0.0700646	-0.568382	0.569776
TXLNG	taxilin gamma [Source:HGNC Symbol;Acc:HGNC:18578]	55787	Q9NUQ3	ENSG00000086712	protein_coding	757.738	0.0755185	0.0754296	1.0012	0.316732	0.675297
PPEF1	protein phosphatase with EF-hand domain 1 [Source:HGNC Symbol;Acc:HGNC:9243]	5475	O14829	ENSG00000086717	protein_coding	6.85542	0.0520796	0.110501	0.474014	0.63549	0.884712
LAT2	linker for activation of T cells family member 2 [Source:HGNC Symbol;Acc:HGNC:12749]	7462		ENSG00000086730	protein_coding	18.3046	0.505814	0.147134	3.44652	0.000567852	0.00738081
HUWE1	HECT, UBA and WWE domain containing 1, E3 ubiquitin protein ligase [Source:HGNC Symbol;Acc:HGNC:30892]	10075		ENSG00000086758	protein_coding	6046.63	-0.0490674	0.0569899	-0.860981	0.389249	0.740422
ZW10	zw10 kinetochore protein [Source:HGNC Symbol;Acc:HGNC:13194]	9183	O43264	ENSG00000086827	protein_coding	665.562	0.0410605	0.0808365	0.507939	0.611496	0.874133
ALG9	ALG9, alpha-1,2-mannosyltransferase [Source:HGNC Symbol;Acc:HGNC:15672]	79796		ENSG00000086848	protein_coding	103.188	-0.0524194	0.14097	-0.37173	0.710094	0.913478
MYBPC2	myosin binding protein C, fast type [Source:HGNC Symbol;Acc:HGNC:7550]	4606	Q14324	ENSG00000086967	protein_coding	0.1266	-0.00283079	0.0243034	-0.116473	0.907278
NOX4	NADPH oxidase 4 [Source:HGNC Symbol;Acc:HGNC:7891]	50507	Q9NPH5	ENSG00000086991	protein_coding	164.403	-0.457866	0.131915	-3.46473	0.000530765	0.00698639
ACOX3	acyl-CoA oxidase 3, pristanoyl [Source:HGNC Symbol;Acc:HGNC:121]	8310	O15254	ENSG00000087008	protein_coding	621.751	-0.0327872	0.0810773	-0.404386	0.685929	0.904029
MTMR2	myotubularin related protein 2 [Source:HGNC Symbol;Acc:HGNC:7450]	8898	Q13614	ENSG00000087053	protein_coding	1640.22	-0.282543	0.057747	-4.89212	9.97572e-07	2.82823e-05
PPP1R15A	protein phosphatase 1 regulatory subunit 15A [Source:HGNC Symbol;Acc:HGNC:14375]	23645	O75807	ENSG00000087074	protein_coding	1040.45	0.189066	0.071104	2.65918	0.00783316	0.0601742
HSD17B14	hydroxysteroid 17-beta dehydrogenase 14 [Source:HGNC Symbol;Acc:HGNC:23238]	51171	Q9BPX1	ENSG00000087076	protein_coding	80.3432	-0.439992	0.151402	-2.89884	0.00374546	0.0338968
TRIP6	thyroid hormone receptor interactor 6 [Source:HGNC Symbol;Acc:HGNC:12311]	7205	Q15654	ENSG00000087077	protein_coding	1783.47	0.010608	0.0634864	0.167088	0.867301	0.963061
ACHE	acetylcholinesterase (Cartwright blood group) [Source:HGNC Symbol;Acc:HGNC:108]	43	P22303	ENSG00000087085	protein_coding	3.45743	-0.0699647	0.0871732	-0.817706	0.413525
FTL	ferritin light chain [Source:HGNC Symbol;Acc:HGNC:3999]	2512	P02792	ENSG00000087086	protein_coding	23358.1	-0.132244	0.0453488	-2.91614	0.0035439	0.0324117
SRRT	serrate, RNA effector molecule [Source:HGNC Symbol;Acc:HGNC:24101]	51593	Q9BXP5	ENSG00000087087	protein_coding	2164.49	0.0606871	0.0522358	1.16181	0.245315	0.59523
BAX	BCL2 associated X, apoptosis regulator [Source:HGNC Symbol;Acc:HGNC:959]	581	Q07812	ENSG00000087088	protein_coding	1114.82	0.0425989	0.0663563	0.64197	0.520893	0.826883
NLK	nemo like kinase [Source:HGNC Symbol;Acc:HGNC:29858]	51701	Q9UBE8	ENSG00000087095	protein_coding	932.861	-0.0166397	0.0690924	-0.240832	0.809686	0.947307
PIGS	phosphatidylinositol glycan anchor biosynthesis class S [Source:HGNC Symbol;Acc:HGNC:14937]	94005		ENSG00000087111	protein_coding	1013.35	-0.19864	0.0666014	-2.98214	0.0028624	0.0276
ADAMTS2	ADAM metallopeptidase with thrombospondin type 1 motif 2 [Source:HGNC Symbol;Acc:HGNC:218]	9509	O95450	ENSG00000087116	protein_coding	0.758276	0.0330356	0.0416819	0.847975	0.396452
TMPRSS11E	transmembrane serine protease 11E [Source:HGNC Symbol;Acc:HGNC:24465]	28983	Q9UL52	ENSG00000087128	protein_coding	0.176059	0.00862596	0.0243034	0.354932	0.722641
ATXN7L3	ataxin 7 like 3 [Source:HGNC Symbol;Acc:HGNC:25416]	56970		ENSG00000087152	protein_coding	1499.47	-0.0449464	0.0580207	-0.774649	0.438547	0.778656
PGS1	phosphatidylglycerophosphate synthase 1 [Source:HGNC Symbol;Acc:HGNC:30029]	9489	Q32NB8	ENSG00000087157	protein_coding	1188.82	-0.0890982	0.0631522	-1.41078	0.158309	0.46743
PSMC5	proteasome 26S subunit, ATPase 5 [Source:HGNC Symbol;Acc:HGNC:9552]	5705		ENSG00000087191	protein_coding	626.871	0.0589569	0.0943685	0.624752	0.532134	0.83462
UIMC1	ubiquitin interaction motif containing 1 [Source:HGNC Symbol;Acc:HGNC:30298]	51720	Q96RL1	ENSG00000087206	protein_coding	747.091	0.0363373	0.0760323	0.477919	0.632708	0.883778
CETP	cholesteryl ester transfer protein [Source:HGNC Symbol;Acc:HGNC:1869]	1071	P11597	ENSG00000087237	protein_coding	13.8018	0.246841	0.138542	1.79198	0.0731356	0.293564
MMP2	matrix metallopeptidase 2 [Source:HGNC Symbol;Acc:HGNC:7166]	4313	P08253	ENSG00000087245	protein_coding	0.548571	-0.0376767	0.0374121	-0.919496	0.357836
MT3	metallothionein 3 [Source:HGNC Symbol;Acc:HGNC:7408]	4504		ENSG00000087250	protein_coding	0
LPCAT2	lysophosphatidylcholine acyltransferase 2 [Source:HGNC Symbol;Acc:HGNC:26032]	54947	Q7L5N7	ENSG00000087253	protein_coding	0
GNAO1	G protein subunit alpha o1 [Source:HGNC Symbol;Acc:HGNC:4389]	2775	P09471	ENSG00000087258	protein_coding	1.50705	0.0079932	0.0601579	0.133282	0.893971
OGFOD1	2-oxoglutarate and iron dependent oxygenase domain containing 1 [Source:HGNC Symbol;Acc:HGNC:25585]	55239	Q8N543	ENSG00000087263	protein_coding	866.731	0.233992	0.0714902	3.27322	0.00106328	0.0124864
SH3BP2	SH3 domain binding protein 2 [Source:HGNC Symbol;Acc:HGNC:10825]	6452	P78314	ENSG00000087266	protein_coding	915.646	-0.148122	0.072555	-2.04133	0.0412179	0.201454
NOP14	NOP14 nucleolar protein [Source:HGNC Symbol;Acc:HGNC:16821]	8602	P78316	ENSG00000087269	protein_coding	984.595	0.104181	0.068283	1.52576	0.12707	0.411762
ADD1	adducin 1 [Source:HGNC Symbol;Acc:HGNC:243]	118		ENSG00000087274	protein_coding	6418.84	-0.140304	0.0466599	-3.00694	0.00263895	0.0259467
L2HGDH	L-2-hydroxyglutarate dehydrogenase [Source:HGNC Symbol;Acc:HGNC:20499]	79944		ENSG00000087299	protein_coding	275.903	-0.0585657	0.107589	-0.544309	0.586229	0.860748
TXNDC16	thioredoxin domain containing 16 [Source:HGNC Symbol;Acc:HGNC:19965]	57544	Q9P2K2	ENSG00000087301	protein_coding	289.697	-0.139566	0.106315	-1.31242	0.18938	0.517052
RTRAF	RNA transcription, translation and transport factor [Source:HGNC Symbol;Acc:HGNC:23169]	51637	Q9Y224	ENSG00000087302	protein_coding	1359	-0.00942944	0.0618465	-0.152464	0.878821	0.967448
NID2	nidogen 2 [Source:HGNC Symbol;Acc:HGNC:13389]	22795	Q14112	ENSG00000087303	protein_coding	1.62712	0.0393153	0.0597359	0.658526	0.5102
GMCL1	germ cell-less, spermatogenesis associated 1 [Source:HGNC Symbol;Acc:HGNC:23843]	64395	Q96IK5	ENSG00000087338	protein_coding	996.145	0.0772089	0.0836627	0.92285	0.356086	0.712293
SF3B2	splicing factor 3b subunit 2 [Source:HGNC Symbol;Acc:HGNC:10769]	10992		ENSG00000087365	protein_coding	4467.06	-0.0384137	0.0464798	-0.826457	0.408545	0.756945
KLHL42	kelch like family member 42 [Source:HGNC Symbol;Acc:HGNC:29252]	57542	Q9P2K6	ENSG00000087448	protein_coding	664.166	-0.0868232	0.0801464	-1.0832	0.27872	0.635266
GNAS	GNAS complex locus [Source:HGNC Symbol;Acc:HGNC:4392]	2778	O95467	ENSG00000087460	protein_coding	8962.58	-0.0266303	0.0483473	-0.550813	0.581762	0.858922
DNM1L	dynamin 1 like [Source:HGNC Symbol;Acc:HGNC:2973]	10059	O00429	ENSG00000087470	protein_coding	2684.1	0.287231	0.0531166	5.40763	6.38641e-08	2.30714e-06
PTHLH	parathyroid hormone like hormone [Source:HGNC Symbol;Acc:HGNC:9607]	5744	P12272	ENSG00000087494	protein_coding	95.026	-0.0663511	0.143443	-0.462569	0.643673	0.887982
PHACTR3	phosphatase and actin regulator 3 [Source:HGNC Symbol;Acc:HGNC:15833]	116154	Q96KR7	ENSG00000087495	protein_coding	0.788259	0.0302811	0.0397058	0.826715	0.408399
ERGIC2	ERGIC and golgi 2 [Source:HGNC Symbol;Acc:HGNC:30208]	51290	Q96RQ1	ENSG00000087502	protein_coding	1603.38	0.0292683	0.0596341	0.490803	0.623566	0.879551
TFAP2C	transcription factor AP-2 gamma [Source:HGNC Symbol;Acc:HGNC:11744]	7022	Q92754	ENSG00000087510	protein_coding	2.63205	0.10055	0.0740567	1.41032	0.158444
AURKA	aurora kinase A [Source:HGNC Symbol;Acc:HGNC:11393]	6790	O14965	ENSG00000087586	protein_coding	2308.17	0.115401	0.061794	1.86752	0.0618284	0.262681
CASS4	Cas scaffolding protein family member 4 [Source:HGNC Symbol;Acc:HGNC:15878]	57091	Q9NQ75	ENSG00000087589	protein_coding	114.45	0.26575	0.137236	1.93651	0.052805	0.235599
PIR	pirin [Source:HGNC Symbol;Acc:HGNC:30048]	8544	O00625	ENSG00000087842	protein_coding	542.84	-0.201501	0.0835552	-2.41095	0.0159109	0.10178
AAMDC	adipogenesis associated Mth938 domain containing [Source:HGNC Symbol;Acc:HGNC:30205]	28971	Q9H7C9	ENSG00000087884	protein_coding	345.5	0.0292183	0.0992203	0.294487	0.768385	0.933232
RFX2	regulatory factor X2 [Source:HGNC Symbol;Acc:HGNC:9983]	5990	P48378	ENSG00000087903	protein_coding	68.48	-0.22819	0.152884	-1.49085	0.136001	0.429347
METTL2A	methyltransferase like 2A [Source:HGNC Symbol;Acc:HGNC:25755]	339175	Q96IZ6	ENSG00000087995	protein_coding	674.509	0.0156867	0.0810124	0.193643	0.846455	0.957316
SULT2B1	sulfotransferase family 2B member 1 [Source:HGNC Symbol;Acc:HGNC:11459]	6820	O00204	ENSG00000088002	protein_coding	9.4832	-0.0865334	0.127066	-0.680782	0.49601	0.814716
ALG6	ALG6, alpha-1,3-glucosyltransferase [Source:HGNC Symbol;Acc:HGNC:23157]	29929	Q9Y672	ENSG00000088035	protein_coding	330.411	0.00686691	0.098653	0.0696065	0.944507	0.98565
CNOT3	CCR4-NOT transcription complex subunit 3 [Source:HGNC Symbol;Acc:HGNC:7879]	4849	O75175	ENSG00000088038	protein_coding	146.062	-0.121001	0.130371	-0.92774	0.353542	0.709962
GP6	glycoprotein VI platelet [Source:HGNC Symbol;Acc:HGNC:14388]	51206	Q9HCN6	ENSG00000088053	protein_coding	0.881081	0.0412923	0.0447453	1.02078	0.307359
PTPN4	protein tyrosine phosphatase, non-receptor type 4 [Source:HGNC Symbol;Acc:HGNC:9656]	5775	P29074	ENSG00000088179	protein_coding	754.208	0.0669007	0.0746517	0.896224	0.370133	0.72524
DDX18	DEAD-box helicase 18 [Source:HGNC Symbol;Acc:HGNC:2741]	8886	Q9NVP1	ENSG00000088205	protein_coding	3367.24	0.0666481	0.0502482	1.32638	0.184712	0.5095
KHSRP	KH-type splicing regulatory protein [Source:HGNC Symbol;Acc:HGNC:6316]	8570	Q92945	ENSG00000088247	protein_coding	2762.33	-0.0170755	0.0557422	-0.306327	0.759355	0.930461
GNA11	G protein subunit alpha 11 [Source:HGNC Symbol;Acc:HGNC:4379]	2767	P29992	ENSG00000088256	protein_coding	1268.95	-0.0251375	0.0633273	-0.396942	0.69141	0.904797
ASAP3	ArfGAP with SH3 domain, ankyrin repeat and PH domain 3 [Source:HGNC Symbol;Acc:HGNC:14987]	55616	Q8TDY4	ENSG00000088280	protein_coding	47.796	0.00112649	0.15713	0.00716868	0.99428	0.998667
EDEM2	ER degradation enhancing alpha-mannosidase like protein 2 [Source:HGNC Symbol;Acc:HGNC:15877]	55741	Q9BV94	ENSG00000088298	protein_coding	887.023	-0.057578	0.073654	-0.781701	0.43439	0.7765
DNMT3B	DNA methyltransferase 3 beta [Source:HGNC Symbol;Acc:HGNC:2979]	1789	Q9UBC3	ENSG00000088305	protein_coding	252.198	-0.197837	0.113025	-1.74978	0.0801568	0.311055
REM1	RRAD and GEM like GTPase 1 [Source:HGNC Symbol;Acc:HGNC:15922]	28954	O75628	ENSG00000088320	protein_coding	1.07919	-0.0420112	0.0488424	-0.963522	0.335285
TPX2	TPX2, microtubule nucleation factor [Source:HGNC Symbol;Acc:HGNC:1249]	22974	Q9ULW0	ENSG00000088325	protein_coding	5421.08	-0.110103	0.055034	-2.00062	0.0454336	0.214914
				ENSG00000088340		37.6372	-0.0129435	0.157922	-0.0819671	0.934673	0.983596
PDRG1	p53 and DNA damage regulated 1 [Source:HGNC Symbol;Acc:HGNC:16119]	81572	Q9NUG6	ENSG00000088356	protein_coding	333.583	-0.0826313	0.103222	-0.800318	0.423527	0.767791
EPB41L1	erythrocyte membrane protein band 4.1 like 1 [Source:HGNC Symbol;Acc:HGNC:3378]	2036	Q9H4G0	ENSG00000088367	protein_coding	261.733	0.0479329	0.111766	0.428938	0.667968	0.897021
SLC15A1	solute carrier family 15 member 1 [Source:HGNC Symbol;Acc:HGNC:10920]	6564	P46059	ENSG00000088386	protein_coding	0.865349	-0.031699	0.0449364	-0.748705	0.454035
DOCK9	dedicator of cytokinesis 9 [Source:HGNC Symbol;Acc:HGNC:14132]	23348		ENSG00000088387	protein_coding	488.715	0.0101187	0.0886955	0.114084	0.909171	0.976496
ANKRD10	ankyrin repeat domain 10 [Source:HGNC Symbol;Acc:HGNC:20265]	55608	Q9NXR5	ENSG00000088448	protein_coding	1481.49	0.012246	0.0631362	0.193963	0.846205	0.957159
TGDS	TDP-glucose 4,6-dehydratase [Source:HGNC Symbol;Acc:HGNC:20324]	23483	O95455	ENSG00000088451	protein_coding	337.686	0.0848778	0.0981125	0.865209	0.386924	0.739165
DOCK3	dedicator of cytokinesis 3 [Source:HGNC Symbol;Acc:HGNC:2989]	1795	Q8IZD9	ENSG00000088538	protein_coding	8.46444	0.0317646	0.115232	0.274754	0.783505	0.938909
C3orf18	chromosome 3 open reading frame 18 [Source:HGNC Symbol;Acc:HGNC:24837]	51161	Q9UK00	ENSG00000088543	protein_coding	53.1342	-0.336029	0.15732	-2.13503	0.0327587	0.172662
COQ9	coenzyme Q9 [Source:HGNC Symbol;Acc:HGNC:25302]	57017	O75208	ENSG00000088682	protein_coding	1176.83	-0.242583	0.0661133	-3.6686	0.000243882	0.00363062
TMEM40	transmembrane protein 40 [Source:HGNC Symbol;Acc:HGNC:25620]	55287	Q8WWA1	ENSG00000088726	protein_coding	3.70799	0.0747246	0.0874769	0.86477	0.387165
KIF9	kinesin family member 9 [Source:HGNC Symbol;Acc:HGNC:16666]	64147	Q9HAQ2	ENSG00000088727	protein_coding	129.168	-0.248313	0.13731	-1.80641	0.0708538	0.287501
ARHGAP28	Rho GTPase activating protein 28 [Source:HGNC Symbol;Acc:HGNC:25509]	79822	Q9P2N2	ENSG00000088756	protein_coding	333.379	-0.124347	0.101575	-1.22394	0.220977	0.563093
CRLS1	cardiolipin synthase 1 [Source:HGNC Symbol;Acc:HGNC:16148]	54675	Q9UJA2	ENSG00000088766	protein_coding	1339.34	0.010326	0.0675172	0.152937	0.878448	0.967448
DEFB127	defensin beta 127 [Source:HGNC Symbol;Acc:HGNC:16206]	140850	Q9H1M4	ENSG00000088782	protein_coding	0
PPP1R13B	protein phosphatase 1 regulatory subunit 13B [Source:HGNC Symbol;Acc:HGNC:14950]	23368		ENSG00000088808	protein_coding	111.72	0.0526756	0.137893	0.382043	0.70243	0.910477
ATRN	attractin [Source:HGNC Symbol;Acc:HGNC:885]	8455	O75882	ENSG00000088812	protein_coding	766.449	-0.056323	0.0745192	-0.755807	0.449765	0.785284
SMOX	spermine oxidase [Source:HGNC Symbol;Acc:HGNC:15862]	54498	Q9NWM0	ENSG00000088826	protein_coding	253.145	0.0728303	0.114158	0.637993	0.523478	0.829057
SIGLEC1	sialic acid binding Ig like lectin 1 [Source:HGNC Symbol;Acc:HGNC:11127]	6614		ENSG00000088827	protein_coding	2.73188	0.0575858	0.081019	0.713938	0.475266
FKBP1A	FK506 binding protein 1A [Source:HGNC Symbol;Acc:HGNC:3711]	2280	P62942	ENSG00000088832	protein_coding	1033.1	0.0921095	0.0659218	1.39732	0.162318	0.473837
NSFL1C	NSFL1 cofactor [Source:HGNC Symbol;Acc:HGNC:15912]	55968	Q9UNZ2	ENSG00000088833	protein_coding	775.18	-0.0151961	0.0799607	-0.19004	0.849278	0.958178
SLC4A11	solute carrier family 4 member 11 [Source:HGNC Symbol;Acc:HGNC:16438]	83959	Q8NBS3	ENSG00000088836	protein_coding	71.4034	1.53624	0.154732	9.63479	5.7009e-22	1.40684e-19
C20orf194	chromosome 20 open reading frame 194 [Source:HGNC Symbol;Acc:HGNC:17721]	25943	Q5TEA3	ENSG00000088854	protein_coding	255.708	0.129621	0.110948	1.16856	0.24258	0.591544
ZNF343	zinc finger protein 343 [Source:HGNC Symbol;Acc:HGNC:16017]	79175	Q6P1L6	ENSG00000088876	protein_coding	148.132	-0.0861788	0.127688	-0.674749	0.499835	0.816866
EBF4	early B cell factor 4 [Source:HGNC Symbol;Acc:HGNC:29278]	57593		ENSG00000088881	protein_coding	24.1931	0.117853	0.154495	0.762913	0.445516	0.783465
CPXM1	carboxypeptidase X, M14 family member 1 [Source:HGNC Symbol;Acc:HGNC:15771]	56265	Q96SM3	ENSG00000088882	protein_coding	0.881081	0.0412923	0.0447453	1.02078	0.307359
MAVS	mitochondrial antiviral signaling protein [Source:HGNC Symbol;Acc:HGNC:29233]	57506	Q7Z434	ENSG00000088888	protein_coding	2995.83	-0.0871648	0.0539822	-1.61468	0.10638	0.369776
LZTS3	leucine zipper tumor suppressor family member 3 [Source:HGNC Symbol;Acc:HGNC:30139]	9762	O60299	ENSG00000088899	protein_coding	136.46	0.246915	0.131136	1.8832	0.0596738	0.256449
F11	coagulation factor XI [Source:HGNC Symbol;Acc:HGNC:3529]	2160	P03951	ENSG00000088926	protein_coding	0.285343	-0.00939388	0.0254535	-0.362042	0.717321
XRN2	5'-3' exoribonuclease 2 [Source:HGNC Symbol;Acc:HGNC:12836]	22803	Q9H0D6	ENSG00000088930	protein_coding	3559.64	0.0231338	0.0476937	0.485052	0.627639	0.881937
KIZ	kizuna centrosomal protein [Source:HGNC Symbol;Acc:HGNC:15865]	55857	Q2M2Z5	ENSG00000088970	protein_coding	183.861	-0.222665	0.124445	-1.78781	0.0738061	0.295498
DYNLL1	dynein light chain LC8-type 1 [Source:HGNC Symbol;Acc:HGNC:15476]	8655	P63167	ENSG00000088986	protein_coding	1782	-0.0376896	0.0551834	-0.682983	0.494618	0.814177
TESC	tescalcin [Source:HGNC Symbol;Acc:HGNC:26065]	54997	Q96BS2	ENSG00000088992	protein_coding	4.86719	0.139725	0.0986795	1.43437	0.151466	0.456455
SNX5	sorting nexin 5 [Source:HGNC Symbol;Acc:HGNC:14969]	27131	Q9Y5X3	ENSG00000089006	protein_coding	2831.24	0.104736	0.0509411	2.05604	0.039779	0.196606
RPL6	ribosomal protein L6 [Source:HGNC Symbol;Acc:HGNC:10362]	6128	Q02878	ENSG00000089009	protein_coding	8201.27	-0.0347704	0.0454954	-0.764259	0.444713	0.783074
SIRPG	signal regulatory protein gamma [Source:HGNC Symbol;Acc:HGNC:15757]	55423	Q9P1W8	ENSG00000089012	protein_coding	0.200205	0.00862596	0.0243034	0.354932	0.722641
MAPKAPK5	mitogen-activated protein kinase-activated protein kinase 5 [Source:HGNC Symbol;Acc:HGNC:6889]	8550	Q8IW41	ENSG00000089022	protein_coding	689.141	-0.0142753	0.0769696	-0.18547	0.852861	0.959852
P2RX7	purinergic receptor P2X 7 [Source:HGNC Symbol;Acc:HGNC:8537]	5027		ENSG00000089041	protein_coding	1.25164	-0.00754636	0.0561981	-0.133803	0.893558
ESF1	ESF1 nucleolar pre-rRNA processing protein homolog [Source:HGNC Symbol;Acc:HGNC:15898]	51575	Q9H501	ENSG00000089048	protein_coding	366.839	0.18517	0.101063	1.8324	0.0668918	0.276287
RBBP9	RB binding protein 9, serine hydrolase [Source:HGNC Symbol;Acc:HGNC:9892]	10741	O75884	ENSG00000089050	protein_coding	474.502	-0.0062114	0.0921041	-0.0674397	0.946232	0.985902
ANAPC5	anaphase promoting complex subunit 5 [Source:HGNC Symbol;Acc:HGNC:15713]	51433		ENSG00000089053	protein_coding	3428.47	0.00644529	0.0454804	0.141716	0.887305	0.970515
SLC23A2	solute carrier family 23 member 2 [Source:HGNC Symbol;Acc:HGNC:10973]	9962	Q9UGH3	ENSG00000089057	protein_coding	407.089	-0.0364113	0.0920985	-0.395342	0.692591	0.905385
SLC8B1	solute carrier family 8 member B1 [Source:HGNC Symbol;Acc:HGNC:26175]	80024	Q6J4K2	ENSG00000089060	protein_coding	273.453	0.239856	0.10848	2.21117	0.0270241	0.150123
TMEM230	transmembrane protein 230 [Source:HGNC Symbol;Acc:HGNC:15876]	29058		ENSG00000089063	protein_coding	907.8	-0.0836857	0.0709147	-1.18006	0.237978	0.587187
DZANK1	double zinc ribbon and ankyrin repeat domains 1 [Source:HGNC Symbol;Acc:HGNC:15858]	55184		ENSG00000089091	protein_coding	57.7109	-0.0340194	0.155066	-0.219413	0.826329	0.951549
KDM2B	lysine demethylase 2B [Source:HGNC Symbol;Acc:HGNC:13610]	84678	Q8NHM5	ENSG00000089094	protein_coding	729.545	0.0120408	0.077591	0.155189	0.876672	0.966582
CFAP61	cilia and flagella associated protein 61 [Source:HGNC Symbol;Acc:HGNC:15872]	26074		ENSG00000089101	protein_coding	1.76878	-0.0755256	0.0669094	-1.16834	0.242671
LHX5	LIM homeobox 5 [Source:HGNC Symbol;Acc:HGNC:14216]	64211	Q9H2C1	ENSG00000089116	protein_coding	0
TASP1	taspase 1 [Source:HGNC Symbol;Acc:HGNC:15859]	55617	Q9H6P5	ENSG00000089123	protein_coding	177.683	-0.150569	0.121787	-1.23582	0.216525	0.556511
OAS1	2'-5'-oligoadenylate synthetase 1 [Source:HGNC Symbol;Acc:HGNC:8086]	4938	P00973	ENSG00000089127	protein_coding	155.371	0.766718	0.138511	5.52981	3.2058e-08	1.21577e-06
GCN1	GCN1, eIF2 alpha kinase activator homolog [Source:HGNC Symbol;Acc:HGNC:4199]	10985	Q92616	ENSG00000089154	protein_coding	6179.34	0.0284077	0.041029	0.692382	0.488697	0.810226
RPLP0	ribosomal protein lateral stalk subunit P0 [Source:HGNC Symbol;Acc:HGNC:10371]	6175	P05388	ENSG00000089157	protein_coding	38946.8	0.0821965	0.0508276	1.61716	0.105844	0.369199
PXN	paxillin [Source:HGNC Symbol;Acc:HGNC:9718]	5829	P49023	ENSG00000089159	protein_coding	689.696	0.0201701	0.0796014	0.253398	0.799961	0.943973
SIRT4	sirtuin 4 [Source:HGNC Symbol;Acc:HGNC:14932]	23409		ENSG00000089163	protein_coding	19.0451	-0.132273	0.147986	-0.892907	0.371907	0.726396
RPH3A	rabphilin 3A [Source:HGNC Symbol;Acc:HGNC:17056]	22895		ENSG00000089169	protein_coding	0.481457	-0.00573565	0.033031	-0.17007	0.864955
KIF16B	kinesin family member 16B [Source:HGNC Symbol;Acc:HGNC:15869]	55614	Q96L93	ENSG00000089177	protein_coding	288.908	0.113522	0.104933	1.08204	0.279235	0.63572
TRMT6	tRNA methyltransferase 6 [Source:HGNC Symbol;Acc:HGNC:20900]	51605	Q9UJA5	ENSG00000089195	protein_coding	598.881	0.16865	0.0822041	2.05179	0.0401899	0.197966
CHGB	chromogranin B [Source:HGNC Symbol;Acc:HGNC:1930]	1114	P05060	ENSG00000089199	protein_coding	9.21902	-0.150132	0.125389	-1.20619	0.227745	0.571516
PEBP1	phosphatidylethanolamine binding protein 1 [Source:HGNC Symbol;Acc:HGNC:8630]	5037	P30086	ENSG00000089220	protein_coding	12198.1	0.112307	0.0504823	2.22469	0.0261018	0.146279
TBX5	T-box 5 [Source:HGNC Symbol;Acc:HGNC:11604]	6910	Q99593	ENSG00000089225	protein_coding	0.305398	-0.00985477	0.0260662	-0.394137	0.69348
BRAP	BRCA1 associated protein [Source:HGNC Symbol;Acc:HGNC:1099]	8315	Q7Z569	ENSG00000089234	protein_coding	789.058	-0.0936761	0.0730238	-1.28275	0.19958	0.53221
ERP29	endoplasmic reticulum protein 29 [Source:HGNC Symbol;Acc:HGNC:13799]	10961	P30040	ENSG00000089248	protein_coding	2671.32	-0.147152	0.0614486	-2.39465	0.0166363	0.105002
NOS1	nitric oxide synthase 1 [Source:HGNC Symbol;Acc:HGNC:7872]	4842	P29475	ENSG00000089250	protein_coding	0.923756	-0.010642	0.0475472	-0.224267	0.822549
FUS	FUS RNA binding protein [Source:HGNC Symbol;Acc:HGNC:4010]	2521	P35637	ENSG00000089280	protein_coding	710.634	0.0564473	0.0808002	0.698615	0.484792	0.807975
IGBP1	immunoglobulin binding protein 1 [Source:HGNC Symbol;Acc:HGNC:5461]	3476	P78318	ENSG00000089289	protein_coding	2149.58	-0.144252	0.0552716	-2.60976	0.00906064	0.0670403
FXYD5	FXYD domain containing ion transport regulator 5 [Source:HGNC Symbol;Acc:HGNC:4029]	53827		ENSG00000089327	protein_coding	186.801	-0.024995	0.122514	-0.204018	0.83834	0.954967
ZNF302	zinc finger protein 302 [Source:HGNC Symbol;Acc:HGNC:13848]	55900		ENSG00000089335	protein_coding	387.395	-0.013639	0.0960665	-0.14197	0.887103	0.970463
GRAMD1A	GRAM domain containing 1A [Source:HGNC Symbol;Acc:HGNC:29305]	57655		ENSG00000089351	protein_coding	446.9	-0.14661	0.0977517	-1.49951	0.133741	0.425382
FXYD3	FXYD domain containing ion transport regulator 3 [Source:HGNC Symbol;Acc:HGNC:4027]	5349	Q14802	ENSG00000089356	protein_coding	6.44851	0.0575299	0.112235	0.511757	0.608821	0.872926
HEPH	hephaestin [Source:HGNC Symbol;Acc:HGNC:4866]	9843	Q9BQS7	ENSG00000089472	protein_coding	0
CDIP1	cell death inducing p53 target 1 [Source:HGNC Symbol;Acc:HGNC:13234]	29965	Q9H305	ENSG00000089486	protein_coding	25.0601	0.0633299	0.152585	0.415392	0.677855	0.900179
CMTM1	CKLF like MARVEL transmembrane domain containing 1 [Source:HGNC Symbol;Acc:HGNC:19172]	113540	Q8IZ96	ENSG00000089505	protein_coding	15.7968	-0.07088	0.140939	-0.504985	0.613569	0.874968
KCNH4	potassium voltage-gated channel subfamily H member 4 [Source:HGNC Symbol;Acc:HGNC:6253]	23415	Q9UQ05	ENSG00000089558	protein_coding	0.520594	-0.00601041	0.0338692	-0.173985	0.861877
GANAB	glucosidase II alpha subunit [Source:HGNC Symbol;Acc:HGNC:4138]	23193	Q14697	ENSG00000089597	protein_coding	6669.45	-0.0639842	0.0529672	-1.20799	0.227051	0.570756
GMIP	GEM interacting protein [Source:HGNC Symbol;Acc:HGNC:24852]	51291	Q9P107	ENSG00000089639	protein_coding	102.747	0.00329252	0.142702	0.0230701	0.981594	0.995112
RBM41	RNA binding motif protein 41 [Source:HGNC Symbol;Acc:HGNC:25617]	55285	Q96IZ5	ENSG00000089682	protein_coding	543.515	0.0214266	0.0899449	0.238238	0.811697	0.947622
BIRC5	baculoviral IAP repeat containing 5 [Source:HGNC Symbol;Acc:HGNC:593]	332		ENSG00000089685	protein_coding	4909.7	0.00126921	0.0503387	0.025213	0.979885	0.994871
LAG3	lymphocyte activating 3 [Source:HGNC Symbol;Acc:HGNC:6476]	3902	P18627	ENSG00000089692	protein_coding	0.458097	-0.0216853	0.0301911	-0.645641	0.518512
MLF2	myeloid leukemia factor 2 [Source:HGNC Symbol;Acc:HGNC:7126]	8079	Q15773	ENSG00000089693	protein_coding	1631.19	0.0672719	0.0589449	1.1413	0.253747	0.604473
OTUB2	OTU deubiquitinase, ubiquitin aldehyde binding 2 [Source:HGNC Symbol;Acc:HGNC:20351]	78990	Q96DC9	ENSG00000089723	protein_coding	164.781	0.200331	0.125313	1.5988	0.109864	0.377438
DDX24	DEAD-box helicase 24 [Source:HGNC Symbol;Acc:HGNC:13266]	57062	Q9GZR7	ENSG00000089737	protein_coding	3009.57	0.183326	0.0563085	3.2558	0.00113075	0.0131464
ZBTB25	zinc finger and BTB domain containing 25 [Source:HGNC Symbol;Acc:HGNC:13112]	7597		ENSG00000089775	protein_coding	224.684	-0.187556	0.124121	-1.51035	0.130955	0.419981
NECAP1	NECAP endocytosis associated 1 [Source:HGNC Symbol;Acc:HGNC:24539]	25977	Q8NC96	ENSG00000089818	protein_coding	339.936	0.0635576	0.0988828	0.642816	0.520343	0.826783
ARHGAP4	Rho GTPase activating protein 4 [Source:HGNC Symbol;Acc:HGNC:674]	393		ENSG00000089820	protein_coding	27.7265	-0.224164	0.154185	-1.45217	0.146453	0.448965
ANKRD24	ankyrin repeat domain 24 [Source:HGNC Symbol;Acc:HGNC:29424]	170961	Q8TF21	ENSG00000089847	protein_coding	1.64563	-0.00465798	0.0648169	-0.0721447	0.942487
DHX32	DEAH-box helicase 32 (putative) [Source:HGNC Symbol;Acc:HGNC:16717]	55760		ENSG00000089876	protein_coding	980.746	-0.0548195	0.0677885	-0.80865	0.418717	0.764918
RCOR1	REST corepressor 1 [Source:HGNC Symbol;Acc:HGNC:17441]	23186	Q9UKL0	ENSG00000089902	protein_coding	613.663	0.322037	0.0821856	3.91851	8.90997e-05	0.00152751
GPATCH2L	G-patch domain containing 2 like [Source:HGNC Symbol;Acc:HGNC:20210]	55668		ENSG00000089916	protein_coding	882.158	0.081654	0.0718649	1.13625	0.255854	0.60711
LTBP4	latent transforming growth factor beta binding protein 4 [Source:HGNC Symbol;Acc:HGNC:6717]	8425		ENSG00000090006	protein_coding	303.443	-0.0410106	0.111383	-0.368151	0.712761	0.913711
BLVRB	biliverdin reductase B [Source:HGNC Symbol;Acc:HGNC:1063]	645		ENSG00000090013	protein_coding	634.009	-0.225954	0.0820796	-2.75212	0.00592107	0.0484102
SLC9A1	solute carrier family 9 member A1 [Source:HGNC Symbol;Acc:HGNC:11071]	6548	P19634	ENSG00000090020	protein_coding	107.625	0.0611249	0.140782	0.434208	0.664137	0.895861
SPTLC1	serine palmitoyltransferase long chain base subunit 1 [Source:HGNC Symbol;Acc:HGNC:11277]	10558		ENSG00000090054	protein_coding	1301.94	0.0488287	0.0656397	0.743902	0.456936	0.789769
PAPOLA	poly(A) polymerase alpha [Source:HGNC Symbol;Acc:HGNC:14981]	10914	P51003	ENSG00000090060	protein_coding	2553.22	0.0929549	0.0509625	1.82401	0.0681505	0.279706
CCNK	cyclin K [Source:HGNC Symbol;Acc:HGNC:1596]	8812	O75909	ENSG00000090061	protein_coding	44.446	0.0147955	0.157632	0.0937785	0.925285	0.981765
PCBP4	poly(rC) binding protein 4 [Source:HGNC Symbol;Acc:HGNC:8652]	57060	P57723	ENSG00000090097	protein_coding	195.201	-0.16398	0.121524	-1.34884	0.177389	0.497843
RGS1	regulator of G protein signaling 1 [Source:HGNC Symbol;Acc:HGNC:9991]	5996	Q08116	ENSG00000090104	protein_coding	0.142671	-0.00283079	0.0243034	-0.116473	0.907278
YPEL3	yippee like 3 [Source:HGNC Symbol;Acc:HGNC:18327]	83719		ENSG00000090238	protein_coding	268.755	-0.486178	0.106043	-4.57659	4.72625e-06	0.000114219
MRPS33	mitochondrial ribosomal protein S33 [Source:HGNC Symbol;Acc:HGNC:16634]	51650	Q9Y291	ENSG00000090263	protein_coding	983.998	-0.222876	0.0679707	-3.27851	0.00104358	0.0122963
NDUFB2	NADH:ubiquinone oxidoreductase subunit B2 [Source:HGNC Symbol;Acc:HGNC:7697]	4708		ENSG00000090266	protein_coding	1711.57	0.0471614	0.0598159	0.788449	0.430434	0.773161
NUDC	nuclear distribution C, dynein complex regulator [Source:HGNC Symbol;Acc:HGNC:8045]	10726		ENSG00000090273	protein_coding	1657.22	-0.100029	0.0702273	-1.42429	0.154362	0.461624
MAEA	macrophage erythroblast attacher [Source:HGNC Symbol;Acc:HGNC:13731]	10296	Q7L5Y9	ENSG00000090316	protein_coding	1636.23	-0.0694887	0.0595591	-1.16669	0.243337	0.5924
ICAM1	intercellular adhesion molecule 1 [Source:HGNC Symbol;Acc:HGNC:5344]	3383	P05362	ENSG00000090339	protein_coding	275.448	0.218984	0.105022	2.08557	0.0370176	0.18767
STRN4	striatin 4 [Source:HGNC Symbol;Acc:HGNC:15721]	29888	Q9NRL3	ENSG00000090372	protein_coding	1327.7	-0.0286875	0.0652994	-0.439327	0.660425	0.894523
IRAK3	interleukin 1 receptor associated kinase 3 [Source:HGNC Symbol;Acc:HGNC:17020]	11213	Q9Y616	ENSG00000090376	protein_coding	0.668601	0.0101509	0.0395544	0.256456	0.797599
LYZ	lysozyme [Source:HGNC Symbol;Acc:HGNC:6740]	4069	P61626	ENSG00000090382	protein_coding	0.671634	0.0070736	0.041616	0.170186	0.864864
SI	sucrase-isomaltase [Source:HGNC Symbol;Acc:HGNC:10856]	6476	P14410	ENSG00000090402	protein_coding	0.78251	0.0517622	0.0405652	1.38061	0.1674
MUL1	mitochondrial E3 ubiquitin protein ligase 1 [Source:HGNC Symbol;Acc:HGNC:25762]	79594	Q969V5	ENSG00000090432	protein_coding	671.565	-0.138245	0.080458	-1.71802	0.0857921	0.323122
TFAP4	transcription factor AP-4 [Source:HGNC Symbol;Acc:HGNC:11745]	7023	Q01664	ENSG00000090447	protein_coding	288.333	0.361998	0.109166	3.31604	0.000913034	0.0109796
PDCD7	programmed cell death 7 [Source:HGNC Symbol;Acc:HGNC:8767]	10081	Q8N8D1	ENSG00000090470	protein_coding	827.88	-0.0258323	0.0737068	-0.350464	0.725991	0.919413
SPG21	SPG21, maspardin [Source:HGNC Symbol;Acc:HGNC:20373]	51324	Q9NZD8	ENSG00000090487	protein_coding	1208.8	-0.0121707	0.062051	-0.19614	0.844501	0.956897
FETUB	fetuin B [Source:HGNC Symbol;Acc:HGNC:3658]	26998		ENSG00000090512	protein_coding	0
DNAJB11	DnaJ heat shock protein family (Hsp40) member B11 [Source:HGNC Symbol;Acc:HGNC:14889]	51726	Q9UBS4	ENSG00000090520	protein_coding	1017.18	0.20575	0.0690145	2.98141	0.00286921	0.0276217
P3H2	prolyl 3-hydroxylase 2 [Source:HGNC Symbol;Acc:HGNC:19317]	55214	Q8IVL5	ENSG00000090530	protein_coding	3905.66	-0.262082	0.0498116	-5.26127	1.43065e-07	4.82977e-06
THPO	thrombopoietin [Source:HGNC Symbol;Acc:HGNC:11795]	7066	P40225	ENSG00000090534	protein_coding	0.328758	0.00416899	0.0291134	0.143201	0.886132
CHRD	chordin [Source:HGNC Symbol;Acc:HGNC:1949]	8646	Q9H2X0	ENSG00000090539	protein_coding	4.00818	0.0115163	0.0887036	0.129139	0.897247
FLT3LG	fms related tyrosine kinase 3 ligand [Source:HGNC Symbol;Acc:HGNC:3766]	2323		ENSG00000090554	protein_coding	2.50919	0.0136683	0.0728251	0.187997	0.850879
RAB11FIP3	RAB11 family interacting protein 3 [Source:HGNC Symbol;Acc:HGNC:17224]	9727	O75154	ENSG00000090565	protein_coding	1289.67	-0.217016	0.0641913	-3.38042	0.00072374	0.00907057
GNPTG	N-acetylglucosamine-1-phosphate transferase gamma subunit [Source:HGNC Symbol;Acc:HGNC:23026]	84572	Q9UJJ9	ENSG00000090581	protein_coding	1094.45	-0.267016	0.0728046	-3.667	0.000245416	0.00365019
ZNF268	zinc finger protein 268 [Source:HGNC Symbol;Acc:HGNC:13061]	10795	Q14587	ENSG00000090612	protein_coding	357.072	-0.0365719	0.0978691	-0.373635	0.708676	0.913174
GOLGA3	golgin A3 [Source:HGNC Symbol;Acc:HGNC:4426]	2802	Q08378	ENSG00000090615	protein_coding	4519.14	0.145752	0.0477675	3.05129	0.00227857	0.0230902
PABPC4	poly(A) binding protein cytoplasmic 4 [Source:HGNC Symbol;Acc:HGNC:8557]	8761		ENSG00000090621	protein_coding	2407.46	0.0447508	0.0751855	0.595199	0.551711	0.84538
CD209	CD209 molecule [Source:HGNC Symbol;Acc:HGNC:1641]	30835	Q9NNX6	ENSG00000090659	protein_coding	0.871839	0.0215853	0.0462605	0.473363	0.635954
CERS4	ceramide synthase 4 [Source:HGNC Symbol;Acc:HGNC:23747]	79603		ENSG00000090661	protein_coding	2.58186	0.153181	0.0766811	2.0907	0.0365547
MCOLN1	mucolipin 1 [Source:HGNC Symbol;Acc:HGNC:13356]	57192	Q9GZU1	ENSG00000090674	protein_coding	75.23	-0.299502	0.14932	-2.00172	0.0453143	0.21464
USP48	ubiquitin specific peptidase 48 [Source:HGNC Symbol;Acc:HGNC:18533]	84196	Q86UV5	ENSG00000090686	protein_coding	1102.39	0.0372501	0.0718321	0.518573	0.604058	0.870442
EFNB1	ephrin B1 [Source:HGNC Symbol;Acc:HGNC:3226]	1947	P98172	ENSG00000090776	protein_coding	1.5108	0.0906066	0.0590244	1.73855	0.0821141
PDPR	pyruvate dehydrogenase phosphatase regulatory subunit [Source:HGNC Symbol;Acc:HGNC:30264]	55066	Q8NCN5	ENSG00000090857	protein_coding	817.964	-0.0311772	0.0737982	-0.422455	0.672693	0.898449
AARS	alanyl-tRNA synthetase [Source:HGNC Symbol;Acc:HGNC:20]	16	P49588	ENSG00000090861	protein_coding	4554.91	-0.108015	0.0501014	-2.15589	0.0310923	0.166698
GLG1	golgi glycoprotein 1 [Source:HGNC Symbol;Acc:HGNC:4316]	2734	Q92896	ENSG00000090863	protein_coding	6710.67	-0.00967576	0.0475524	-0.203476	0.838763	0.95499
KIF4A	kinesin family member 4A [Source:HGNC Symbol;Acc:HGNC:13339]	24137	O95239	ENSG00000090889	protein_coding	2425.67	0.0225591	0.0532486	0.423659	0.671815	0.898167
TNRC6A	trinucleotide repeat containing 6A [Source:HGNC Symbol;Acc:HGNC:11969]	27327	Q8NDV7	ENSG00000090905	protein_coding	1266.25	0.0305219	0.069008	0.442301	0.658272	0.894284
PLEKHG2	pleckstrin homology and RhoGEF domain containing G2 [Source:HGNC Symbol;Acc:HGNC:29515]	64857	Q9H7P9	ENSG00000090924	protein_coding	195.443	-0.024683	0.1206	-0.204631	0.83786	0.954819
DLL3	delta like canonical Notch ligand 3 [Source:HGNC Symbol;Acc:HGNC:2909]	10683	Q9NYJ7	ENSG00000090932	protein_coding	9.42467	0.101396	0.124011	0.81844	0.413106	0.760777
NAT14	N-acetyltransferase 14 (putative) [Source:HGNC Symbol;Acc:HGNC:28918]	57106	Q8WUY8	ENSG00000090971	protein_coding	468.614	-0.281932	0.0895839	-3.14576	0.00165658	0.017871
PITPNM2	phosphatidylinositol transfer protein membrane associated 2 [Source:HGNC Symbol;Acc:HGNC:21044]	57605	Q9BZ72	ENSG00000090975	protein_coding	178.609	-0.0858634	0.13148	-0.653016	0.513746	0.823318
EXOC1	exocyst complex component 1 [Source:HGNC Symbol;Acc:HGNC:30380]	55763	Q9NV70	ENSG00000090989	protein_coding	1367.56	-0.259084	0.0636475	-4.0701	4.69938e-05	0.000882507
RBM27	RNA binding motif protein 27 [Source:HGNC Symbol;Acc:HGNC:29243]	54439	Q9P2N5	ENSG00000091009	protein_coding	782.052	0.227253	0.0721508	3.14994	0.00163302	0.017651
POU4F3	POU class 4 homeobox 3 [Source:HGNC Symbol;Acc:HGNC:9220]	5459		ENSG00000091010	protein_coding	0.738748	-0.0235805	0.0419576	-0.57975	0.562083
OSBPL8	oxysterol binding protein like 8 [Source:HGNC Symbol;Acc:HGNC:16396]	114882	Q9BZF1	ENSG00000091039	protein_coding	4852.8	-0.250212	0.0442743	-5.65119	1.59337e-08	6.58429e-07
DTX2	deltex E3 ubiquitin ligase 2 [Source:HGNC Symbol;Acc:HGNC:15973]	113878		ENSG00000091073	protein_coding	70.6589	0.0971461	0.151086	0.642992	0.520229	0.826677
NLRC4	NLR family CARD domain containing 4 [Source:HGNC Symbol;Acc:HGNC:16412]	58484	Q9NPP4	ENSG00000091106	protein_coding	11.337	0.0270049	0.134233	0.201203	0.84054	0.95533
PUS7	pseudouridylate synthase 7 (putative) [Source:HGNC Symbol;Acc:HGNC:26033]	54517		ENSG00000091127	protein_coding	735.376	0.0404224	0.0763973	0.529123	0.59672	0.867136
LAMB4	laminin subunit beta 4 [Source:HGNC Symbol;Acc:HGNC:6491]	22798	A4D0S4	ENSG00000091128	protein_coding	3.49839	0.0044516	0.0891905	0.0500732	0.960064
NRCAM	neuronal cell adhesion molecule [Source:HGNC Symbol;Acc:HGNC:7994]	4897	Q92823	ENSG00000091129	protein_coding	23.4735	0.109519	0.152606	0.718979	0.472154	0.799132
LAMB1	laminin subunit beta 1 [Source:HGNC Symbol;Acc:HGNC:6486]	3912		ENSG00000091136	protein_coding	5137.35	-0.229573	0.050595	-4.53736	5.69625e-06	0.00013487
SLC26A4	solute carrier family 26 member 4 [Source:HGNC Symbol;Acc:HGNC:8818]	5172	O43511	ENSG00000091137	protein_coding	3.70431	0.0867114	0.0898374	0.96842	0.332835
SLC26A3	solute carrier family 26 member 3 [Source:HGNC Symbol;Acc:HGNC:3018]	1811		ENSG00000091138	protein_coding	0.176059	0.00862596	0.0243034	0.354932	0.722641
DLD	dihydrolipoamide dehydrogenase [Source:HGNC Symbol;Acc:HGNC:2898]	1738	P09622	ENSG00000091140	protein_coding	1348.06	0.0463645	0.0615176	0.753688	0.451037	0.786486
WDR7	WD repeat domain 7 [Source:HGNC Symbol;Acc:HGNC:13490]	23335		ENSG00000091157	protein_coding	306.414	-0.160095	0.102079	-1.56796	0.116891	0.391669
TXNL1	thioredoxin like 1 [Source:HGNC Symbol;Acc:HGNC:12436]	9352	O43396	ENSG00000091164	protein_coding	1247.21	0.0340321	0.0629586	0.54055	0.588818	0.862238
IL5RA	interleukin 5 receptor subunit alpha [Source:HGNC Symbol;Acc:HGNC:6017]	3568	Q01344	ENSG00000091181	protein_coding	0.1266	-0.00283079	0.0243034	-0.116473	0.907278
ABCC6	ATP binding cassette subfamily C member 6 [Source:HGNC Symbol;Acc:HGNC:57]	368	O95255	ENSG00000091262	protein_coding	426.969	0.203609	0.0937705	2.17161	0.0298854	0.162012
CMTM6	CKLF like MARVEL transmembrane domain containing 6 [Source:HGNC Symbol;Acc:HGNC:19177]	54918	Q9NX76	ENSG00000091317	protein_coding	2689.59	0.127696	0.0590003	2.16436	0.0304367	0.164409
ITGA6	integrin subunit alpha 6 [Source:HGNC Symbol;Acc:HGNC:6142]	3655		ENSG00000091409	protein_coding	723.538	0.21231	0.0740681	2.86664	0.00414852	0.0368031
RAPGEF4	Rap guanine nucleotide exchange factor 4 [Source:HGNC Symbol;Acc:HGNC:16626]	11069	Q8WZA2	ENSG00000091428	protein_coding	6.76574	0.2221	0.111092	2.0336	0.041992	0.204033
MAP3K20	mitogen-activated protein kinase kinase kinase 20 [Source:HGNC Symbol;Acc:HGNC:17797]	51776	Q9NYL2	ENSG00000091436	protein_coding	3864.49	-0.114456	0.0483849	-2.36551	0.0180052	0.111883
SMPX	small muscle protein, X-linked [Source:HGNC Symbol;Acc:HGNC:11122]	23676		ENSG00000091482	protein_coding	5.93844	-0.0850182	0.107264	-0.795635	0.426244	0.770317
FH	fumarate hydratase [Source:HGNC Symbol;Acc:HGNC:3700]	2271	P07954	ENSG00000091483	protein_coding	2197	-0.0866851	0.0561133	-1.54479	0.122397	0.403181
SEL1L3	SEL1L family member 3 [Source:HGNC Symbol;Acc:HGNC:29108]	23231	Q68CR1	ENSG00000091490	protein_coding	8.83328	0.160178	0.119487	1.34519	0.178565	0.499542
TF	transferrin [Source:HGNC Symbol;Acc:HGNC:11740]	7018	P02787	ENSG00000091513	protein_coding	1.50829	-0.075919	0.0595103	-1.44168	0.149391
CDV3	CDV3 homolog [Source:HGNC Symbol;Acc:HGNC:26928]	55573	Q9UKY7	ENSG00000091527	protein_coding	10377.9	-0.142665	0.0404612	-3.52595	0.000421963	0.00577525
MYO15A	myosin XVA [Source:HGNC Symbol;Acc:HGNC:7594]	51168	Q9UKN7	ENSG00000091536	protein_coding	2.21704	0.0416827	0.0738438	0.56629	0.571197
ALKBH5	alkB homolog 5, RNA demethylase [Source:HGNC Symbol;Acc:HGNC:25996]	54890		ENSG00000091542	protein_coding	1877.59	-0.0308316	0.0621705	-0.495924	0.619948	0.877755
APOH	apolipoprotein H [Source:HGNC Symbol;Acc:HGNC:616]	350	P02749	ENSG00000091583	protein_coding	19.3187	-0.140172	0.147775	-0.951486	0.341358	0.698544
NLRP1	NLR family pyrin domain containing 1 [Source:HGNC Symbol;Acc:HGNC:14374]	22861	Q9C000	ENSG00000091592	protein_coding	26.361	-0.106008	0.154272	-0.688412	0.491193	0.811293
PITPNM3	PITPNM family member 3 [Source:HGNC Symbol;Acc:HGNC:21043]	83394	Q9BZ71	ENSG00000091622	protein_coding	79.5525	-0.0257843	0.149003	-0.172939	0.862699	0.96172
SPAG7	sperm associated antigen 7 [Source:HGNC Symbol;Acc:HGNC:11216]	9552		ENSG00000091640	protein_coding	731.836	-0.035253	0.0765947	-0.460245	0.64534	0.888217
ORC6	origin recognition complex subunit 6 [Source:HGNC Symbol;Acc:HGNC:17151]	23594		ENSG00000091651	protein_coding	635.143	0.134143	0.0788381	1.70165	0.0888211	0.3302
ZFHX4	zinc finger homeobox 4 [Source:HGNC Symbol;Acc:HGNC:30939]	79776	Q86UP3	ENSG00000091656	protein_coding	1945.26	-0.129043	0.0555299	-2.32377	0.0201381	0.121795
SLC17A6	solute carrier family 17 member 6 [Source:HGNC Symbol;Acc:HGNC:16703]	57084	Q9P2U8	ENSG00000091664	protein_coding	0
CPA1	carboxypeptidase A1 [Source:HGNC Symbol;Acc:HGNC:2296]	1357		ENSG00000091704	protein_coding	0.142671	-0.00283079	0.0243034	-0.116473	0.907278
ZC3HC1	zinc finger C3HC-type containing 1 [Source:HGNC Symbol;Acc:HGNC:29913]	51530	Q86WB0	ENSG00000091732	protein_coding	499.641	-0.0292189	0.086495	-0.33781	0.735506	0.923072
ESR1	estrogen receptor 1 [Source:HGNC Symbol;Acc:HGNC:3467]	2099		ENSG00000091831	protein_coding	10.2628	-0.00964367	0.127687	-0.0755149	0.939805	0.984534
RGS17	regulator of G protein signaling 17 [Source:HGNC Symbol;Acc:HGNC:14088]	26575	Q9UGC6	ENSG00000091844	protein_coding	240.364	0.346546	0.119588	2.89757	0.0037607	0.0339996
ANGPT2	angiopoietin 2 [Source:HGNC Symbol;Acc:HGNC:485]	285	O15123	ENSG00000091879	protein_coding	46.6683	1.10121	0.157762	6.92888	4.24184e-12	3.14921e-10
TMEM101	transmembrane protein 101 [Source:HGNC Symbol;Acc:HGNC:28653]	84336	Q96IK0	ENSG00000091947	protein_coding	960.389	-0.280046	0.0700734	-3.99555	6.45454e-05	0.00115516
CD200	CD200 molecule [Source:HGNC Symbol;Acc:HGNC:7203]	4345		ENSG00000091972	protein_coding	1.04033	-0.0187741	0.0497809	-0.380027	0.703926
CCDC80	coiled-coil domain containing 80 [Source:HGNC Symbol;Acc:HGNC:30649]	151887	Q76M96	ENSG00000091986	protein_coding	2839.1	0.236485	0.056357	4.1963	2.71308e-05	0.000543888
CMA1	chymase 1 [Source:HGNC Symbol;Acc:HGNC:2097]	1215	P23946	ENSG00000092009	protein_coding	0.200205	0.00862596	0.0243034	0.354932	0.722641
PSME1	proteasome activator subunit 1 [Source:HGNC Symbol;Acc:HGNC:9568]	5720	Q06323	ENSG00000092010	protein_coding	2151.35	-0.0587984	0.0575969	-1.02085	0.307326	0.665842
PPP2R3C	protein phosphatase 2 regulatory subunit B''gamma [Source:HGNC Symbol;Acc:HGNC:17485]	55012		ENSG00000092020	protein_coding	323.106	-0.0108578	0.0989577	-0.109717	0.912634	0.977829
HAUS4	HAUS augmin like complex subunit 4 [Source:HGNC Symbol;Acc:HGNC:20163]	54930	Q9H6D7	ENSG00000092036	protein_coding	240.607	-0.100682	0.114245	-0.880962	0.378338	0.731421
JPH4	junctophilin 4 [Source:HGNC Symbol;Acc:HGNC:20156]	84502	Q96JJ6	ENSG00000092051	protein_coding	1.39632	0.0173053	0.0577037	0.302788	0.762052
MYH7	myosin heavy chain 7 [Source:HGNC Symbol;Acc:HGNC:7577]	4625	P12883	ENSG00000092054	protein_coding	0.215196	0.00862596	0.0243034	0.354932	0.722641
CEBPE	CCAAT/enhancer binding protein epsilon [Source:HGNC Symbol;Acc:HGNC:1836]	1053	Q15744	ENSG00000092067	protein_coding	0
SLC7A8	solute carrier family 7 member 8 [Source:HGNC Symbol;Acc:HGNC:11066]	23428		ENSG00000092068	protein_coding	0.637461	0.00496871	0.0367597	0.133959	0.893435
OSGEP	O-sialoglycoprotein endopeptidase [Source:HGNC Symbol;Acc:HGNC:18028]	55644	Q9NPF4	ENSG00000092094	protein_coding	446.94	-0.0296189	0.0883954	-0.335063	0.737578	0.923549
SLC22A17	solute carrier family 22 member 17 [Source:HGNC Symbol;Acc:HGNC:23095]	51310		ENSG00000092096	protein_coding	50.0499	-0.343993	0.157019	-2.18594	0.02882	0.157461
RNF31	ring finger protein 31 [Source:HGNC Symbol;Acc:HGNC:16031]	55072		ENSG00000092098	protein_coding	316.878	-0.0528368	0.102175	-0.517024	0.605139	0.870729
SCFD1	sec1 family domain containing 1 [Source:HGNC Symbol;Acc:HGNC:20726]	23256	Q8WVM8	ENSG00000092108	protein_coding	982.891	0.191665	0.0684475	2.8003	0.00510554	0.0432021
G2E3	G2/M-phase specific E3 ubiquitin protein ligase [Source:HGNC Symbol;Acc:HGNC:20338]	55632	Q7L622	ENSG00000092140	protein_coding	643.513	0.097245	0.0799398	1.21657	0.223769	0.566978
HECTD1	HECT domain E3 ubiquitin protein ligase 1 [Source:HGNC Symbol;Acc:HGNC:20157]	25831		ENSG00000092148	protein_coding	5017.86	0.00693825	0.0429995	0.161356	0.871813	0.964797
HNRNPC	heterogeneous nuclear ribonucleoprotein C (C1/C2) [Source:HGNC Symbol;Acc:HGNC:5035]	3183		ENSG00000092199	protein_coding	11089.4	0.178613	0.0536851	3.32706	0.000877671	0.010642
RPGRIP1	RPGR interacting protein 1 [Source:HGNC Symbol;Acc:HGNC:13436]	57096		ENSG00000092200	protein_coding	4.04715	0.111209	0.0949493	1.18353	0.236599
SUPT16H	SPT16 homolog, facilitates chromatin remodeling subunit [Source:HGNC Symbol;Acc:HGNC:11465]	11198	Q9Y5B9	ENSG00000092201	protein_coding	2292.35	0.170019	0.0520395	3.26717	0.00108628	0.0127054
TOX4	TOX high mobility group box family member 4 [Source:HGNC Symbol;Acc:HGNC:20161]	9878		ENSG00000092203	protein_coding	1201.62	-0.00572906	0.0642914	-0.0891103	0.928994	0.982312
GEMIN2	gem nuclear organelle associated protein 2 [Source:HGNC Symbol;Acc:HGNC:10884]	8487	O14893	ENSG00000092208	protein_coding	204.649	-0.0873315	0.117699	-0.741905	0.458145	0.790124
TGM1	transglutaminase 1 [Source:HGNC Symbol;Acc:HGNC:11777]	7051	P22735	ENSG00000092295	protein_coding	5.69177	0.195073	0.105474	1.88439	0.0595118	0.256077
TINF2	TERF1 interacting nuclear factor 2 [Source:HGNC Symbol;Acc:HGNC:11824]	26277		ENSG00000092330	protein_coding	502.096	-0.0864754	0.0900819	-0.959897	0.337107	0.694468
DAZL	deleted in azoospermia like [Source:HGNC Symbol;Acc:HGNC:2685]	1618	Q92904	ENSG00000092345	protein_coding	0.633002	-0.0333177	0.0342882	-0.906275	0.36479
TBL1Y	transducin beta like 1 Y-linked [Source:HGNC Symbol;Acc:HGNC:18502]	90665	Q9BQ87	ENSG00000092377	protein_coding	0
SEMA6A	semaphorin 6A [Source:HGNC Symbol;Acc:HGNC:10738]	57556	Q9H2E6	ENSG00000092421	protein_coding	846.301	-0.197992	0.0755802	-2.61927	0.00881193	0.0656995
TRPM7	transient receptor potential cation channel subfamily M member 7 [Source:HGNC Symbol;Acc:HGNC:17994]	54822		ENSG00000092439	protein_coding	4600.82	-0.131014	0.0449532	-2.9144	0.00356368	0.0325356
TYRO3	TYRO3 protein tyrosine kinase [Source:HGNC Symbol;Acc:HGNC:12446]	7301		ENSG00000092445	protein_coding	794.09	0.266236	0.076271	3.49092	0.000481355	0.00643511
WDR76	WD repeat domain 76 [Source:HGNC Symbol;Acc:HGNC:25773]	79968	Q9H967	ENSG00000092470	protein_coding	764.74	0.0337878	0.0776612	0.435076	0.663507	0.895588
CAPN3	calpain 3 [Source:HGNC Symbol;Acc:HGNC:1480]	825	P20807	ENSG00000092529	protein_coding	0.542001	0.0190028	0.036367	0.538214	0.590429
SNAP23	synaptosome associated protein 23 [Source:HGNC Symbol;Acc:HGNC:11131]	8773		ENSG00000092531	protein_coding	2096.51	0.0409878	0.0553293	0.740803	0.458813	0.790388
TBX15	T-box 15 [Source:HGNC Symbol;Acc:HGNC:11594]	6913	Q96SF7	ENSG00000092607	protein_coding	1177.07	0.261026	0.0644355	4.05119	5.09582e-05	0.000942424
PHGDH	phosphoglycerate dehydrogenase [Source:HGNC Symbol;Acc:HGNC:8923]	26227	O43175	ENSG00000092621	protein_coding	1697.84	-0.211797	0.0688827	-3.07445	0.00210892	0.0216845
COL9A3	collagen type IX alpha 3 chain [Source:HGNC Symbol;Acc:HGNC:2219]	1299	Q14050	ENSG00000092758	protein_coding	8.43973	0.386385	0.117053	3.40925	0.00065142	0.00830075
EZR	ezrin [Source:HGNC Symbol;Acc:HGNC:12691]	7430	P15311	ENSG00000092820	protein_coding	9803.13	0.0457654	0.0424424	1.07829	0.280902	0.638186
MYL6	myosin light chain 6 [Source:HGNC Symbol;Acc:HGNC:7587]	4637	P60660	ENSG00000092841	protein_coding	17246.1	-0.114792	0.0553687	-2.07323	0.0381507	0.191579
AGO1	argonaute 1, RISC catalytic component [Source:HGNC Symbol;Acc:HGNC:3262]	26523		ENSG00000092847	protein_coding	1523.46	-0.0644532	0.0607905	-1.06022	0.289043	0.648384
TEKT2	tektin 2 [Source:HGNC Symbol;Acc:HGNC:11725]	27285	Q9UIF3	ENSG00000092850	protein_coding	1.52096	0.00989859	0.059689	0.1667	0.867606
CLSPN	claspin [Source:HGNC Symbol;Acc:HGNC:19715]	63967	Q9HAW4	ENSG00000092853	protein_coding	799.306	0.295169	0.0791935	3.72728	0.000193559	0.00297189
RFFL	ring finger and FYVE like domain containing E3 ubiquitin protein ligase [Source:HGNC Symbol;Acc:HGNC:24821]	117584	Q8WZ73	ENSG00000092871	protein_coding	214.473	-0.211819	0.114717	-1.84523	0.0650046	0.270984
UNC13D	unc-13 homolog D [Source:HGNC Symbol;Acc:HGNC:23147]	201294		ENSG00000092929	protein_coding	1404.5	0.0130739	0.0627856	0.208228	0.835051	0.954007
MFSD11	major facilitator superfamily domain containing 11 [Source:HGNC Symbol;Acc:HGNC:25458]	79157	O43934	ENSG00000092931	protein_coding	648.965	-0.057091	0.0778948	-0.732889	0.463626	0.794289
DPYSL2	dihydropyrimidinase like 2 [Source:HGNC Symbol;Acc:HGNC:3014]	1808		ENSG00000092964	protein_coding	853.183	0.230472	0.0735385	3.13433	0.00172246	0.0184132
TGFB2	transforming growth factor beta 2 [Source:HGNC Symbol;Acc:HGNC:11768]	7042	P61812	ENSG00000092969	protein_coding	491.225	0.0195609	0.0888507	0.220171	0.825738	0.951549
GPATCH2	G-patch domain containing 2 [Source:HGNC Symbol;Acc:HGNC:25499]	55105	Q9NW75	ENSG00000092978	protein_coding	1205.47	0.0152997	0.0622142	0.245918	0.805746	0.946148
NUP50	nucleoporin 50 [Source:HGNC Symbol;Acc:HGNC:8065]	10762	Q9UKX7	ENSG00000093000	protein_coding	1589.19	0.13692	0.0586977	2.33271	0.0196635	0.119502
CDC45	cell division cycle 45 [Source:HGNC Symbol;Acc:HGNC:1739]	8318	O75419	ENSG00000093009	protein_coding	385.333	0.167734	0.0943665	1.7776	0.0754696	0.299096
COMT	catechol-O-methyltransferase [Source:HGNC Symbol;Acc:HGNC:2228]	1312	P21964	ENSG00000093010	protein_coding	922.888	-0.0451632	0.0683104	-0.661124	0.508533	0.820914
ADA2	adenosine deaminase 2 [Source:HGNC Symbol;Acc:HGNC:1839]	51816	Q9NZK5	ENSG00000093072	protein_coding	66.6211	-0.00193003	0.151913	-0.0127044	0.989864	0.997195
				ENSG00000093100		6.815	-0.1159	0.112116	-1.03836	0.2991	0.657451
VNN3	vanin 3 [Source:HGNC Symbol;Acc:HGNC:16431]	55350	Q9NY84	ENSG00000093134	protein_coding	0.152699	-0.00283079	0.0243034	-0.116473	0.907278
ECHDC1	ethylmalonyl-CoA decarboxylase 1 [Source:HGNC Symbol;Acc:HGNC:21489]	55862	Q9NTX5	ENSG00000093144	protein_coding	925.803	0.0890033	0.0684998	1.29938	0.193813	0.523019
[truncated: 56,303 more rows]
