# Supplementary material for: Oncogenic Herpesvirus Engages Endothelial Transcription Factors SOX18 and PROX1 to Increase Viral Genome Copies and Virus Production
Source: Oxford University Press journal article supplement (doi:10.1158/0008-5472.can-19-3103), 2020-06-09
Supplement: 00085472can193103-sup-230139_4_supp_6320225_qmzvm5.pdf [file 00085472can193103-sup-230139_4_supp_6320225_qmzvm5.pdf]

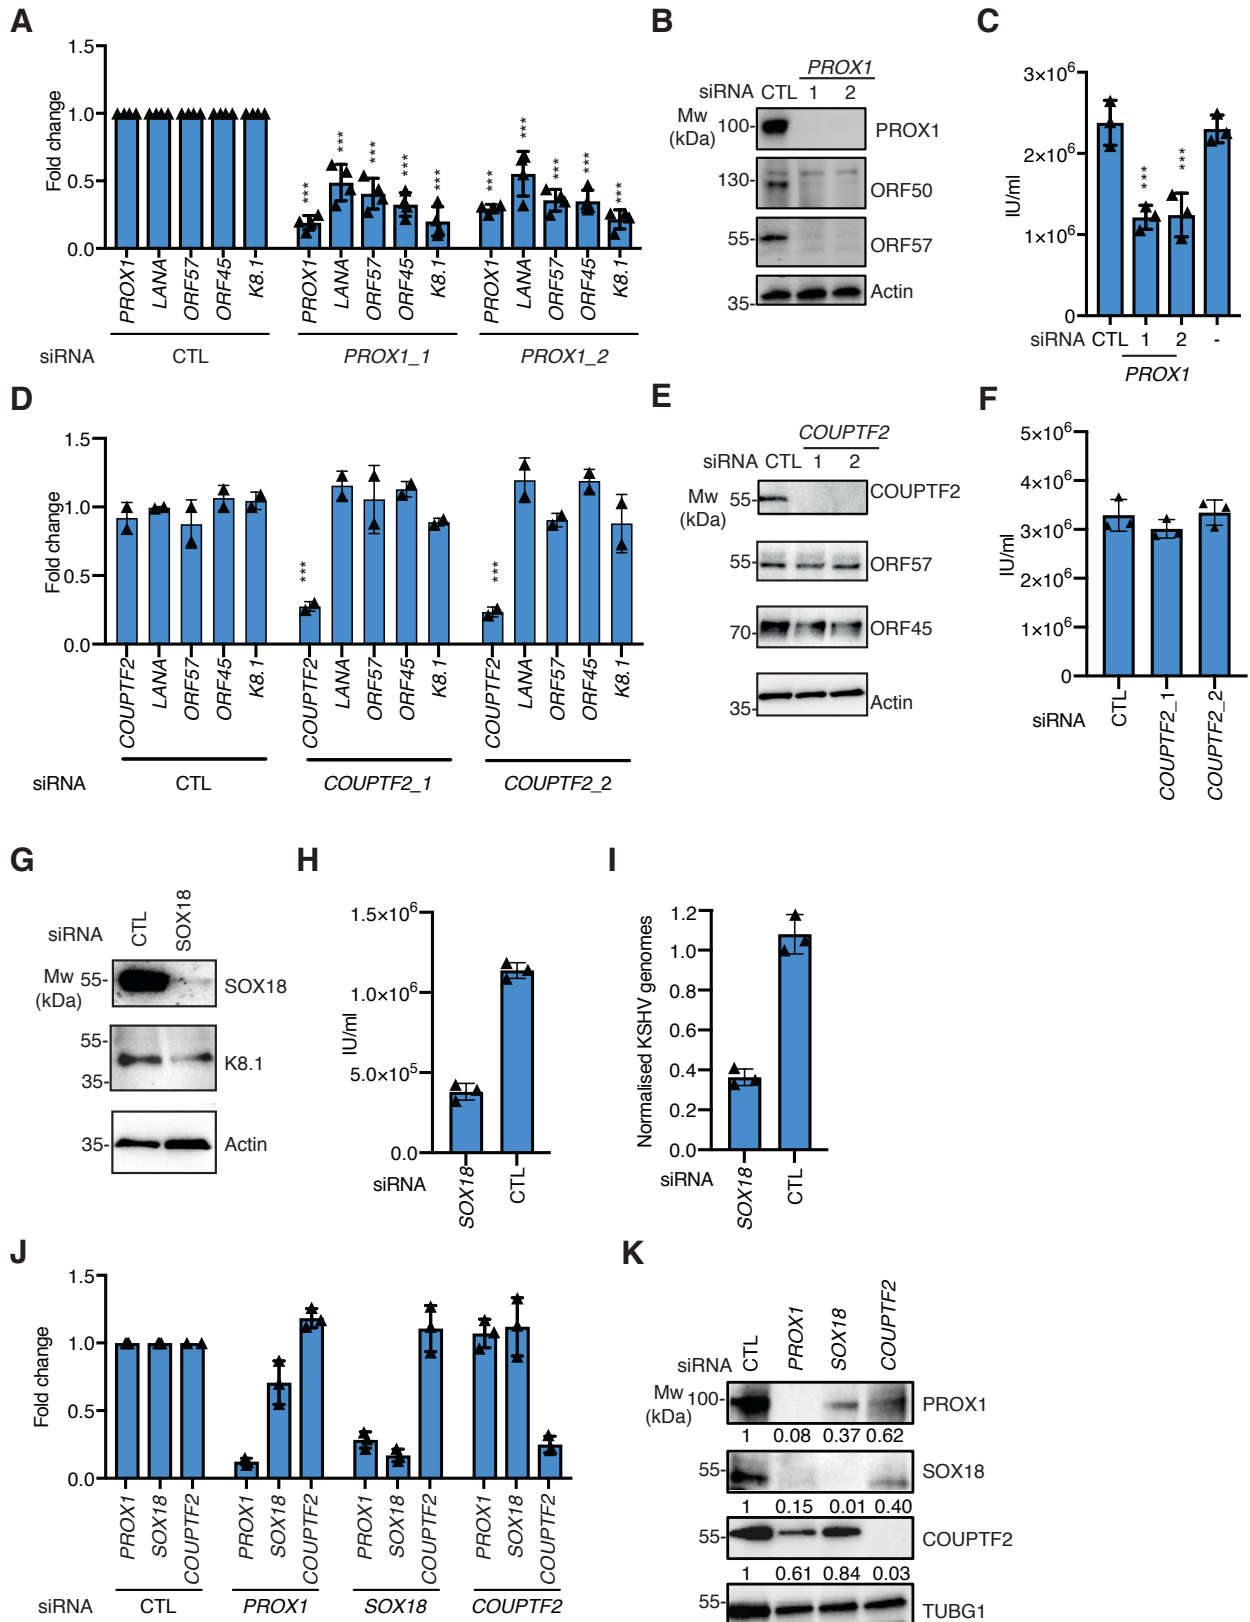

**Supplementary Fig. S2. Effect of PROX1, SOX18 and COUPTF2 depletion by independent siRNAs on the KSHV replication program in KLECs.** (A-F) KLECs were treated with control

siRNAs (CTL) or two different PROX1(A-C) or COUPTF2 (D-F) targeting siRNAs for 72h. Cells were analysed (A,D) by RTqPCR for the indicated viral and cellular targets; single values from n=3 independent experiments are shown. Bars represent mean  $\pm$  SD. (B,E) by immunoblot for the expression of the indicated proteins using actin as a loading control; the experiment was repeated two independent times (C,F) the cell free supernatant was titrated for the presence of infectious virus. Single values from n=3 independent replicates are shown. Bars represent mean  $\pm$  SD. **(G-I)** KLECs were treated with either control or **ON-TARGETplus** SOX18 siRNAs and samples were analysed (G) by immunoblotting for the indicated proteins (H) the cell free supernatant was titrated for the presence of infectious virus. (I) Intracellular viral genome copies were quantified. **(J)** The silencing efficiency of the experiment shown in Fig. 3A was assessed by RTqPCR. Single values from n=3 independent replicates are shown. **(K)** LECs were treated with the indicated siRNAs for 72h. Cell lysates were analysed by immunoblot for the indicated targets, TUBG1 as a loading control.

P values were calculated using ordinary one way-anova followed by Dunn's correction for multiple comparisons. \*:  $p < 0.033$ ; \*\*:  $p < 0.02$ , \*\*\*:  $p < 0.001$ .
